# Supplementary material
Source: PubMed Central journal article supplement (PMC3113711)

**L. NMR SPECTRA OF NEW COMPOUNDS**

|                                                                                   |      |
|-----------------------------------------------------------------------------------|------|
| 1. Section F sidechain precursors ( <b>S1–S25</b> )                               | S60  |
| 2. Section G substituted C1-aryl glycal substrates ( <b>S26, 5–7</b> )            | S107 |
| 3. Section H spiroketal products with retention of configuration ( <b>11–13</b> ) | S137 |
| 4. Section I spiroketal products with inversion of configuration ( <b>8–10</b> )  | S167 |
| 5. Section J cyclohexene oxide substrates ( <b>S27–S30, 26–28</b> )               | S189 |
| 6. Section K TBS-protected methyl glycoside substrates ( <b>29–30</b> )           | S199 |

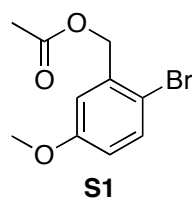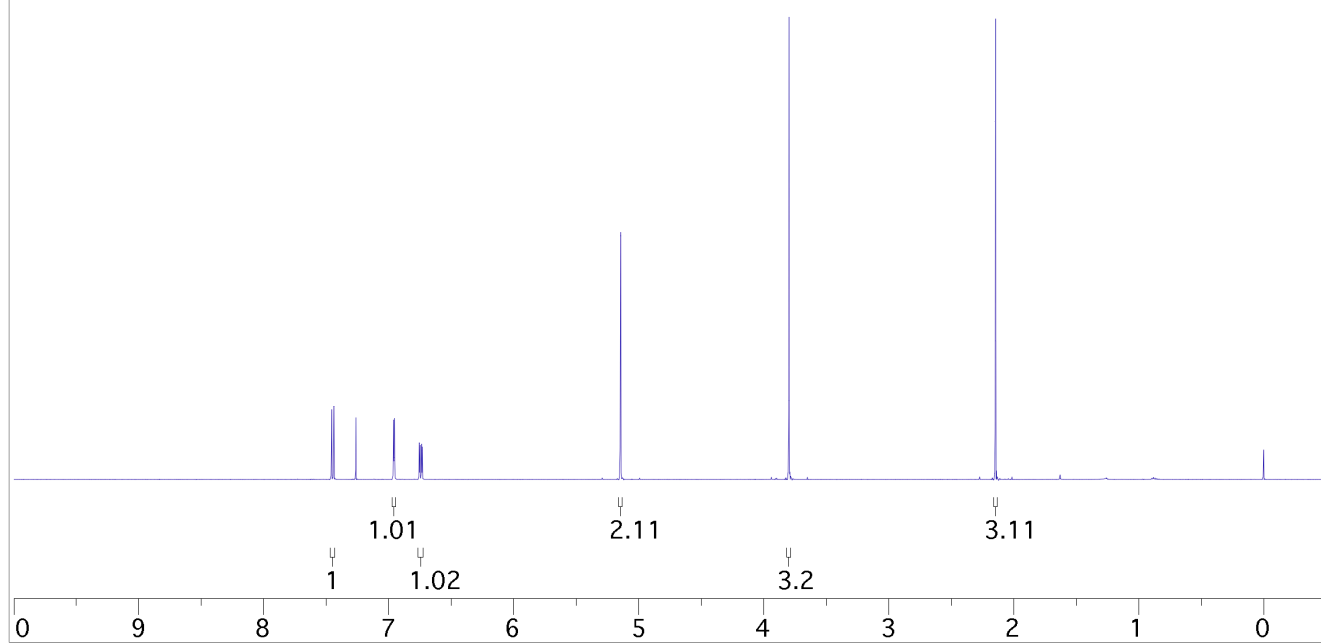

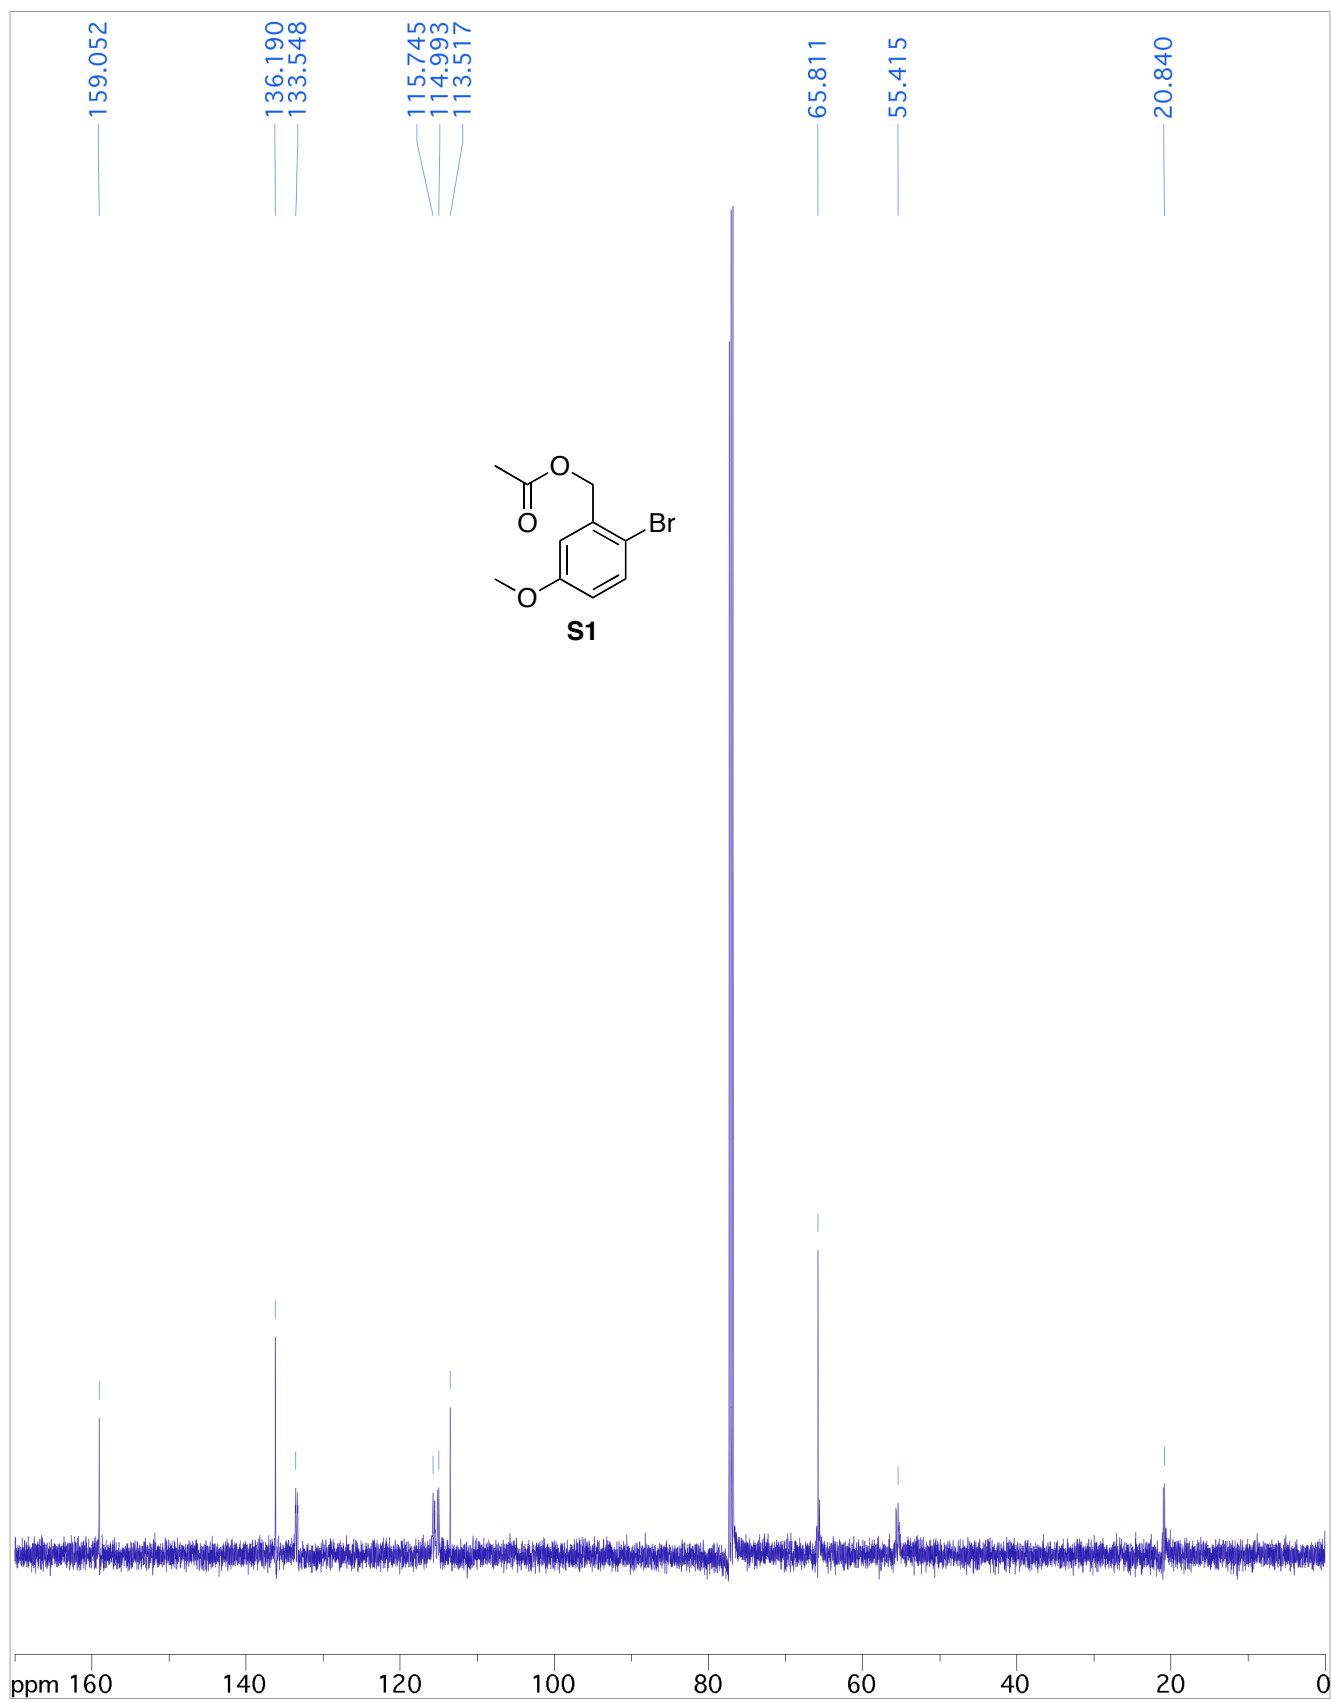

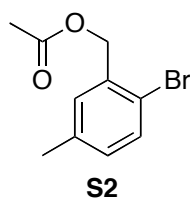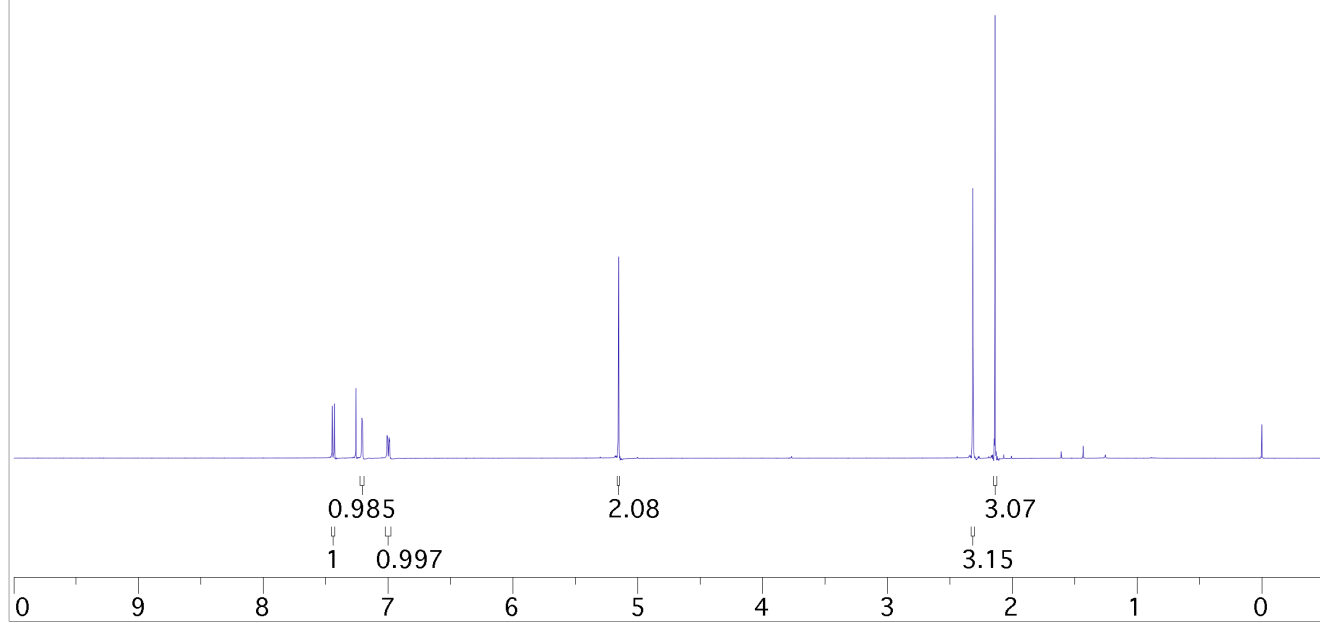

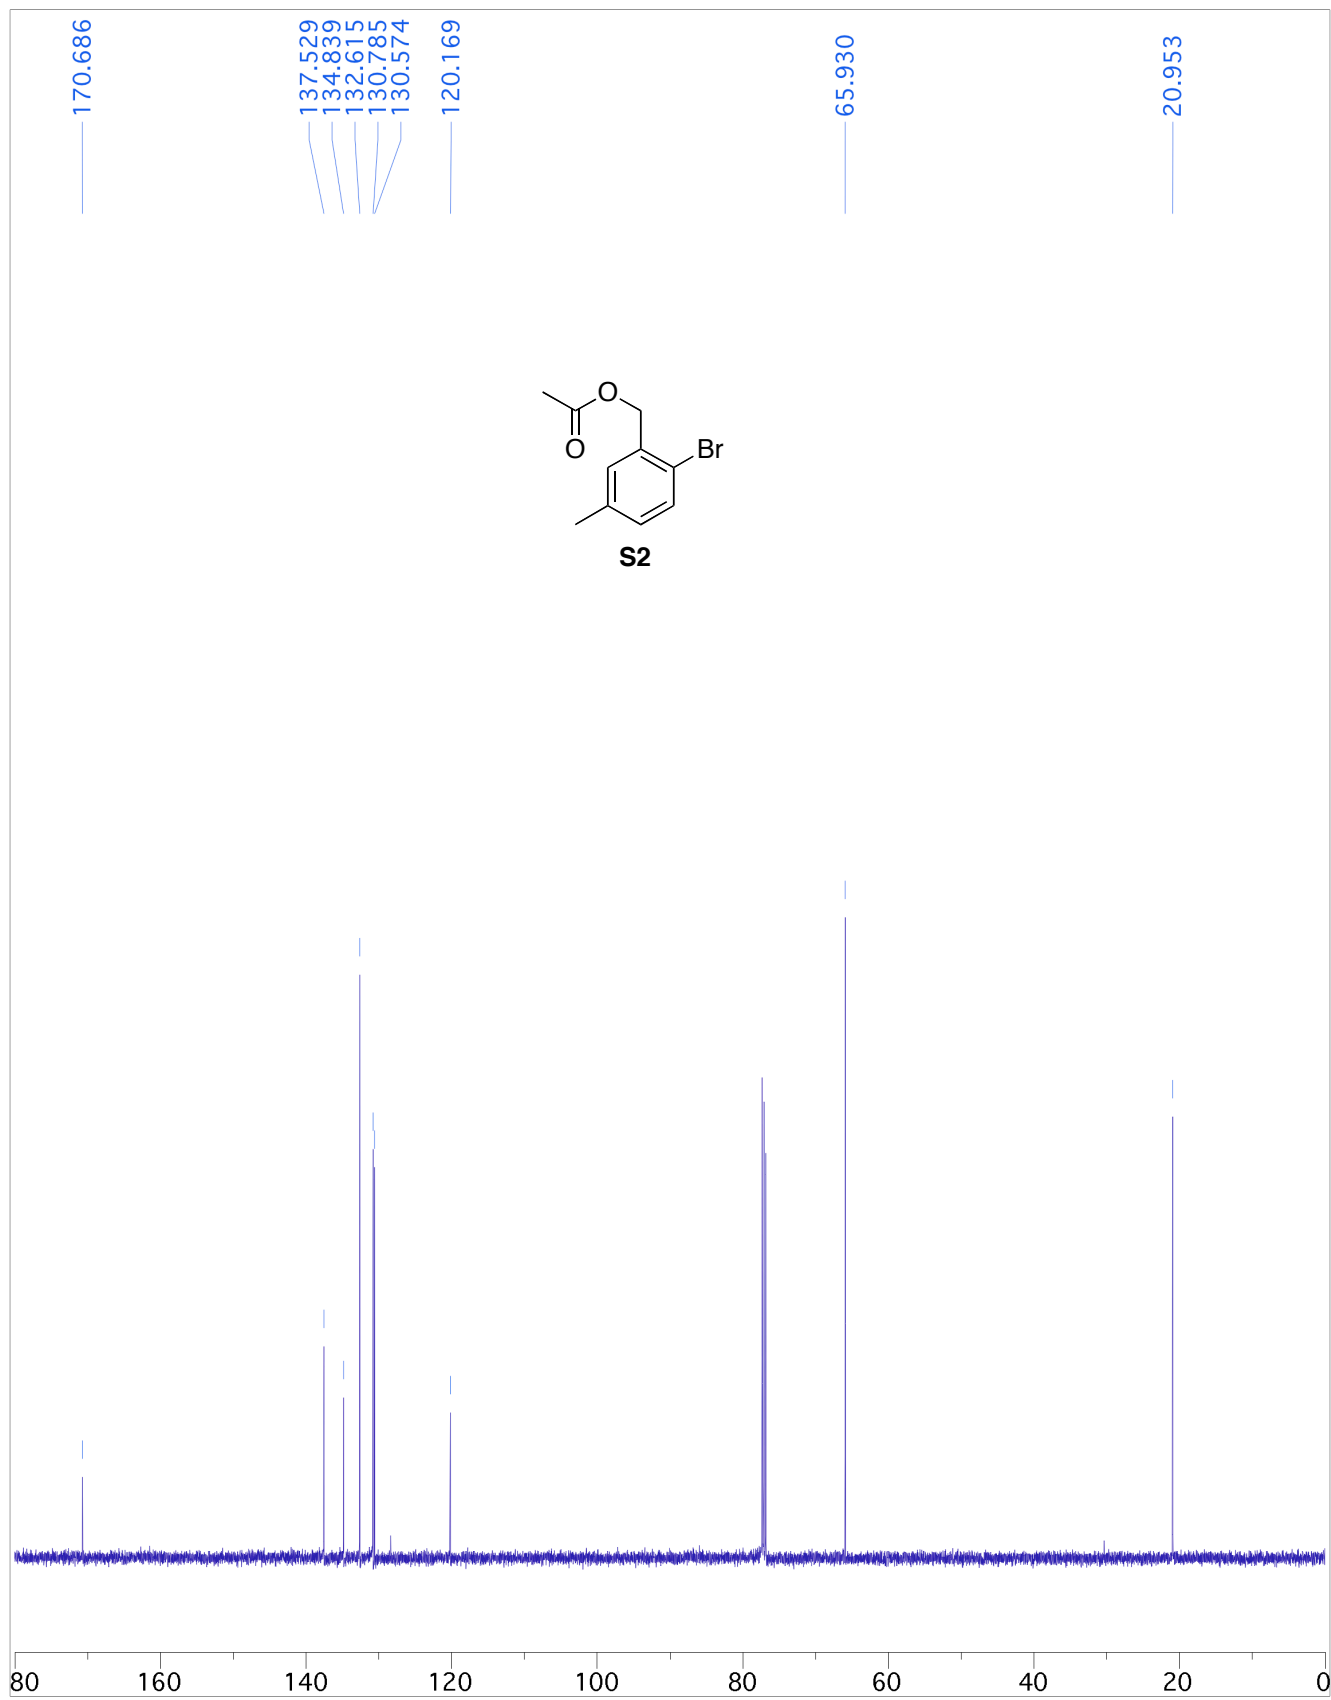

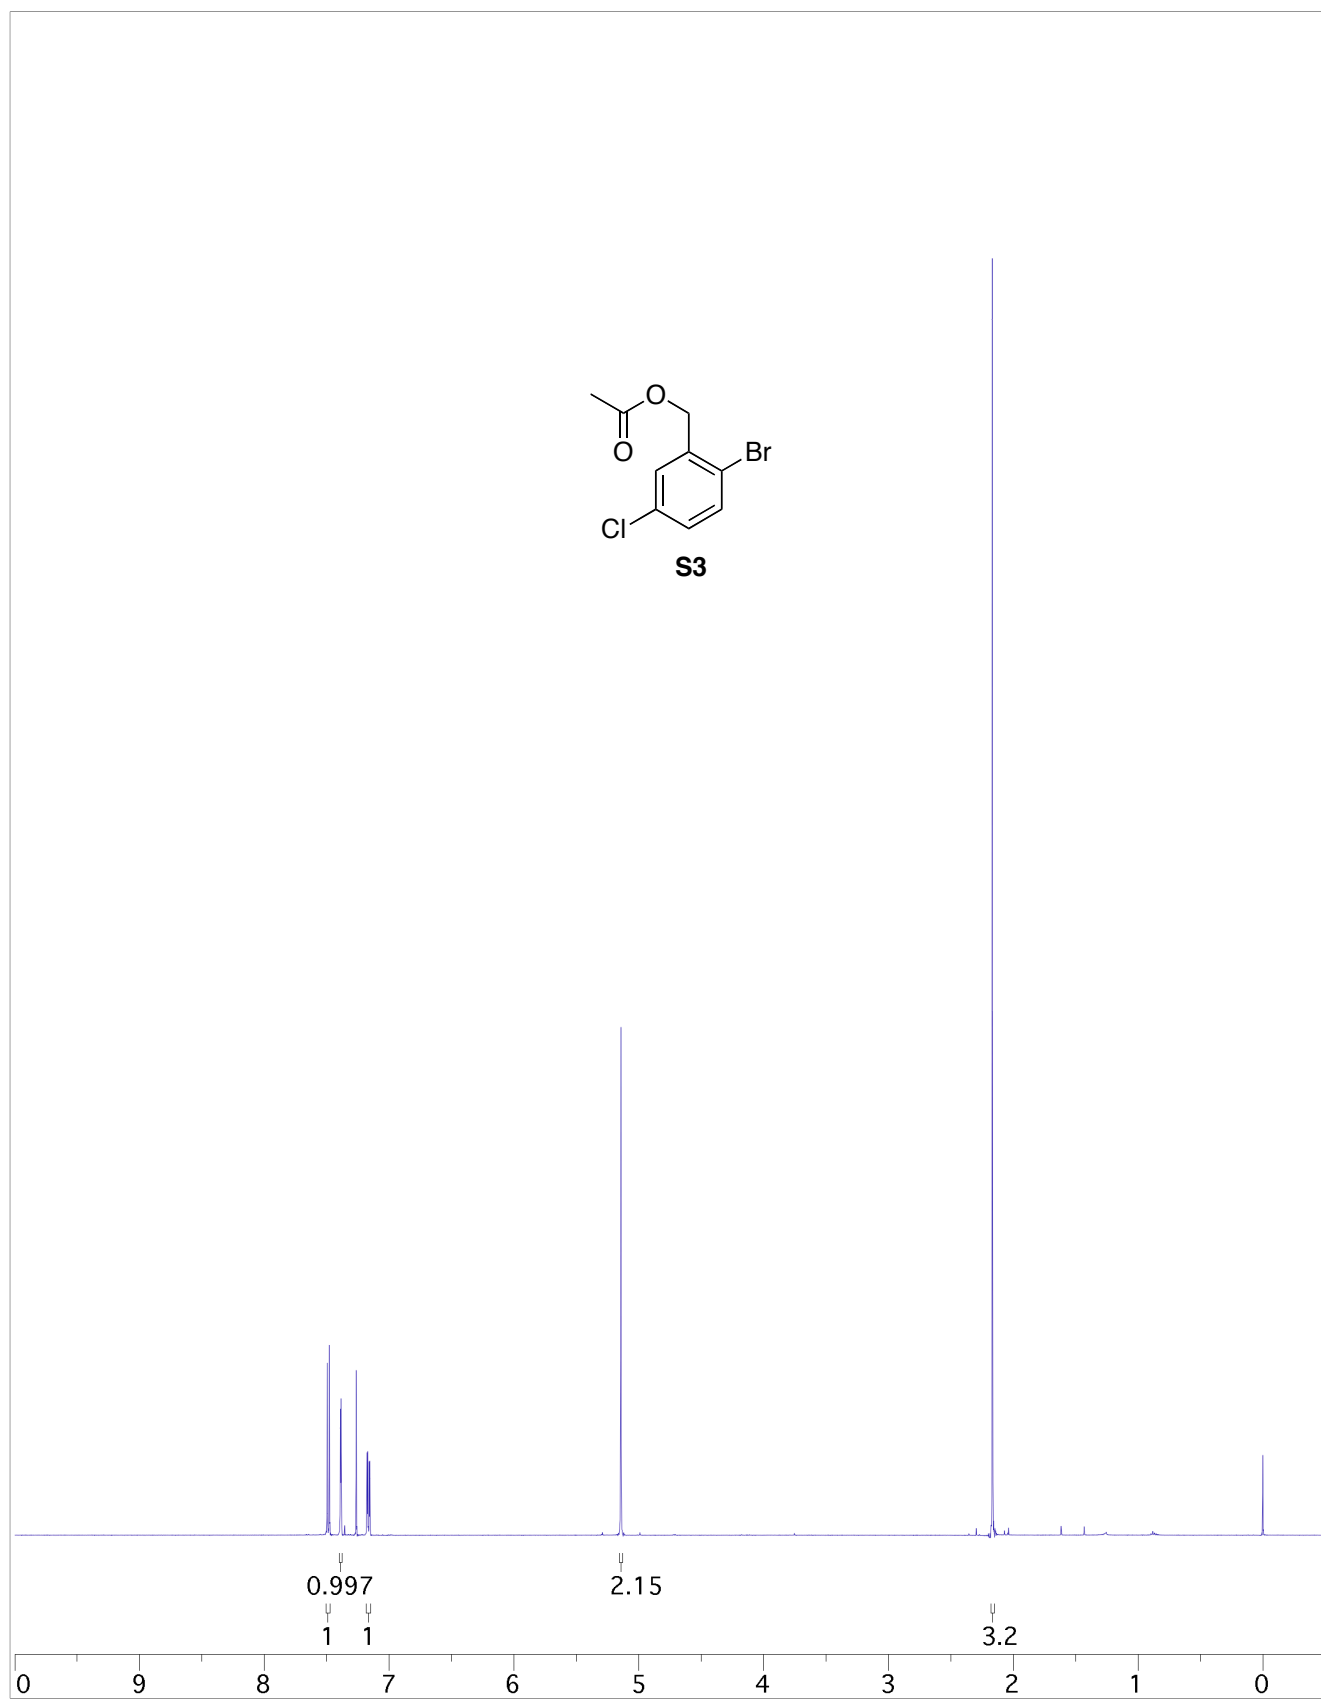

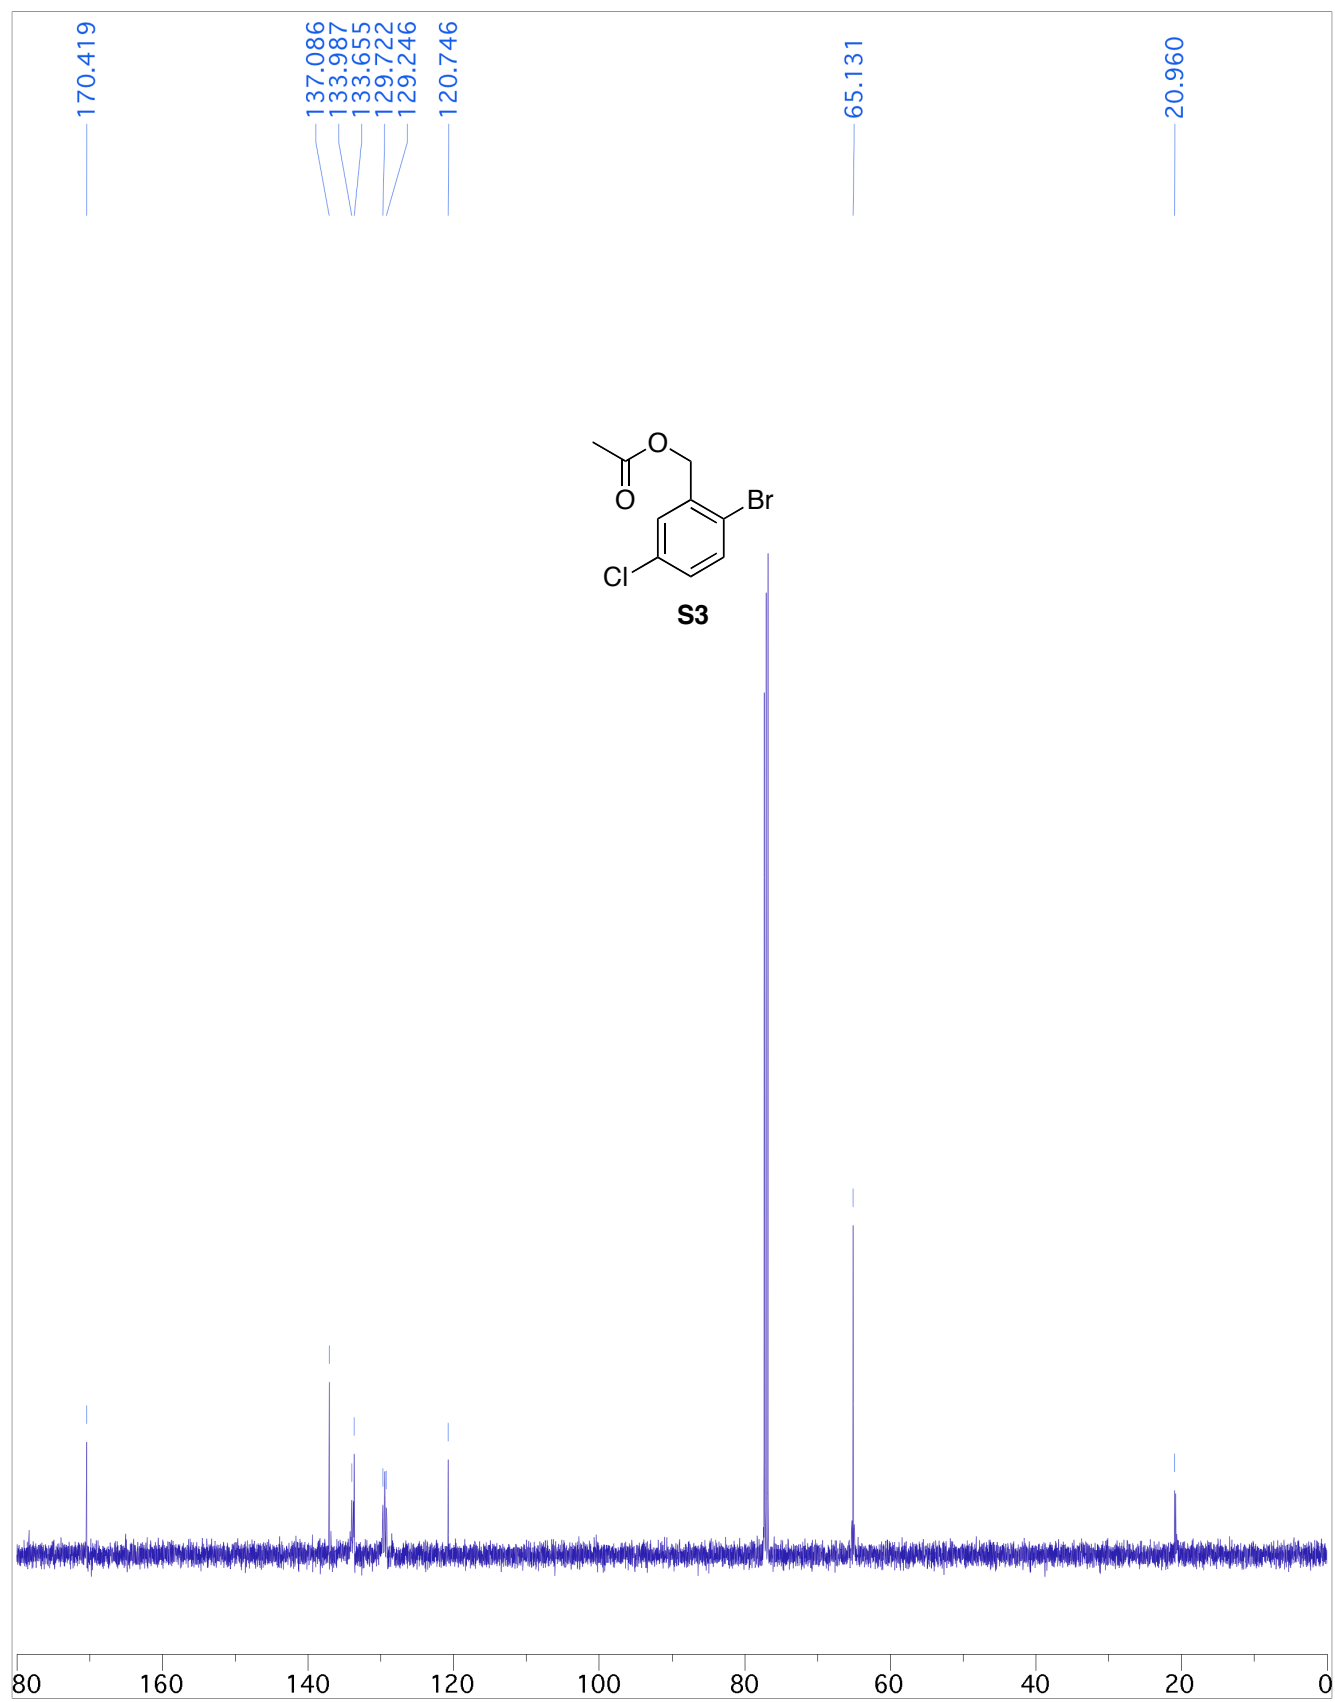

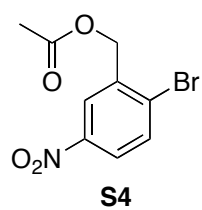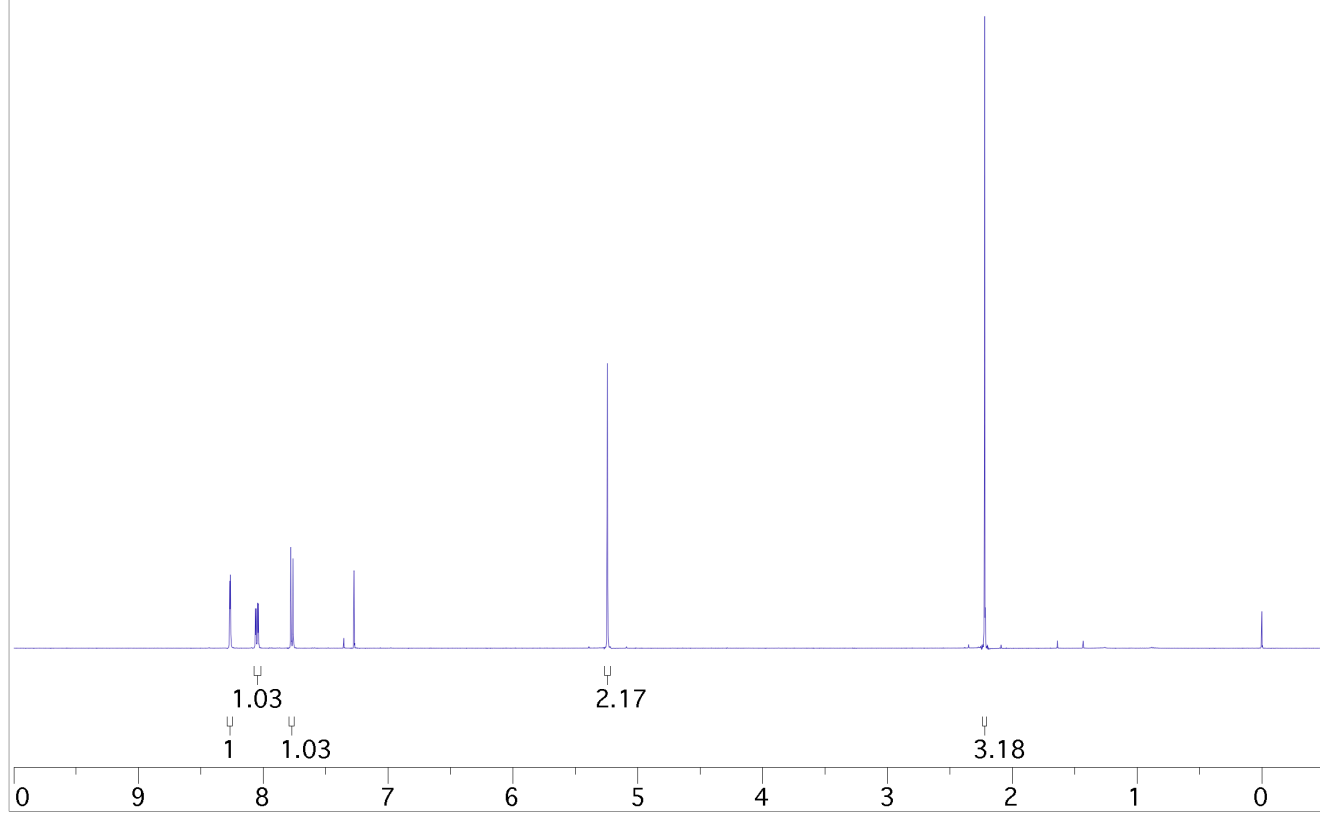



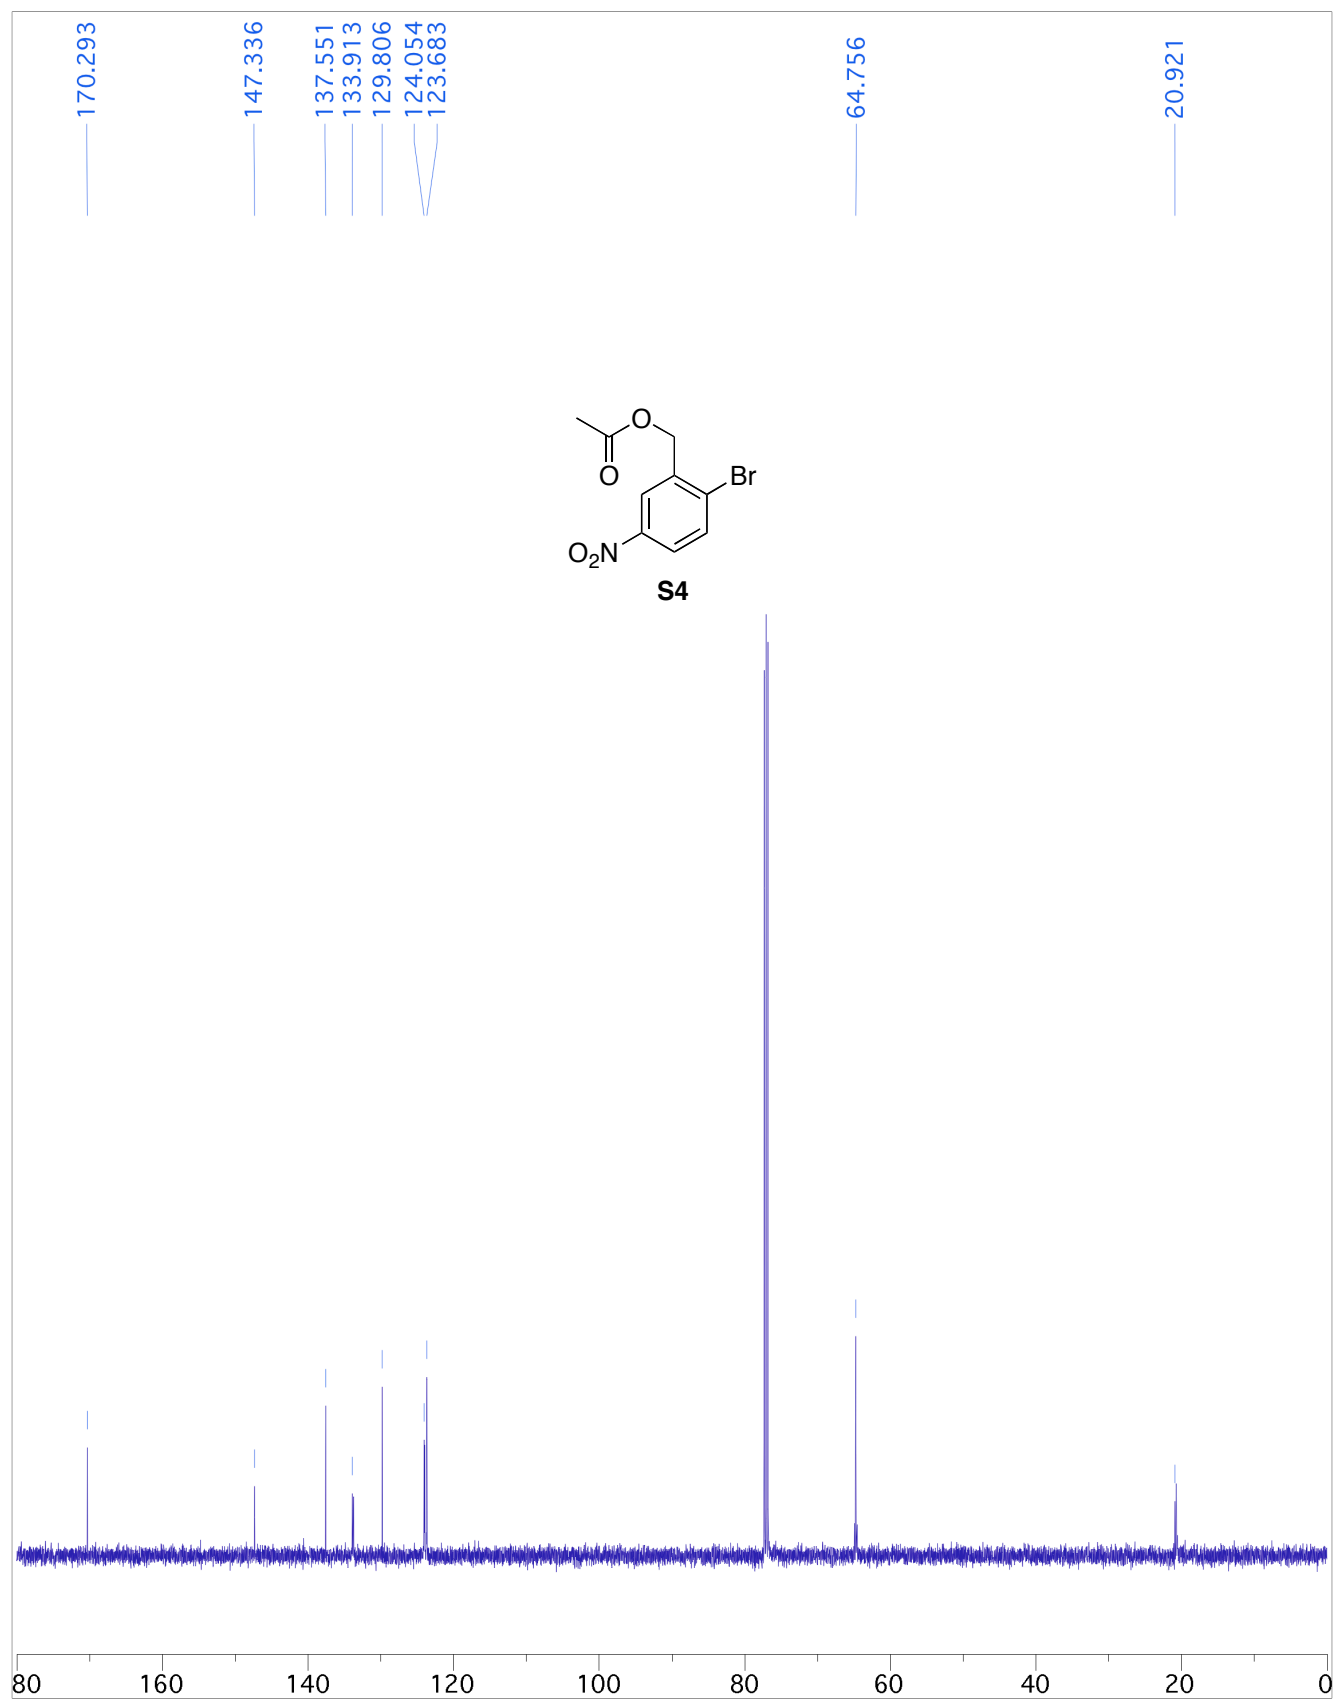

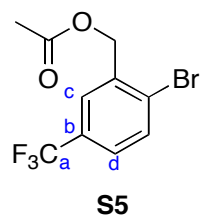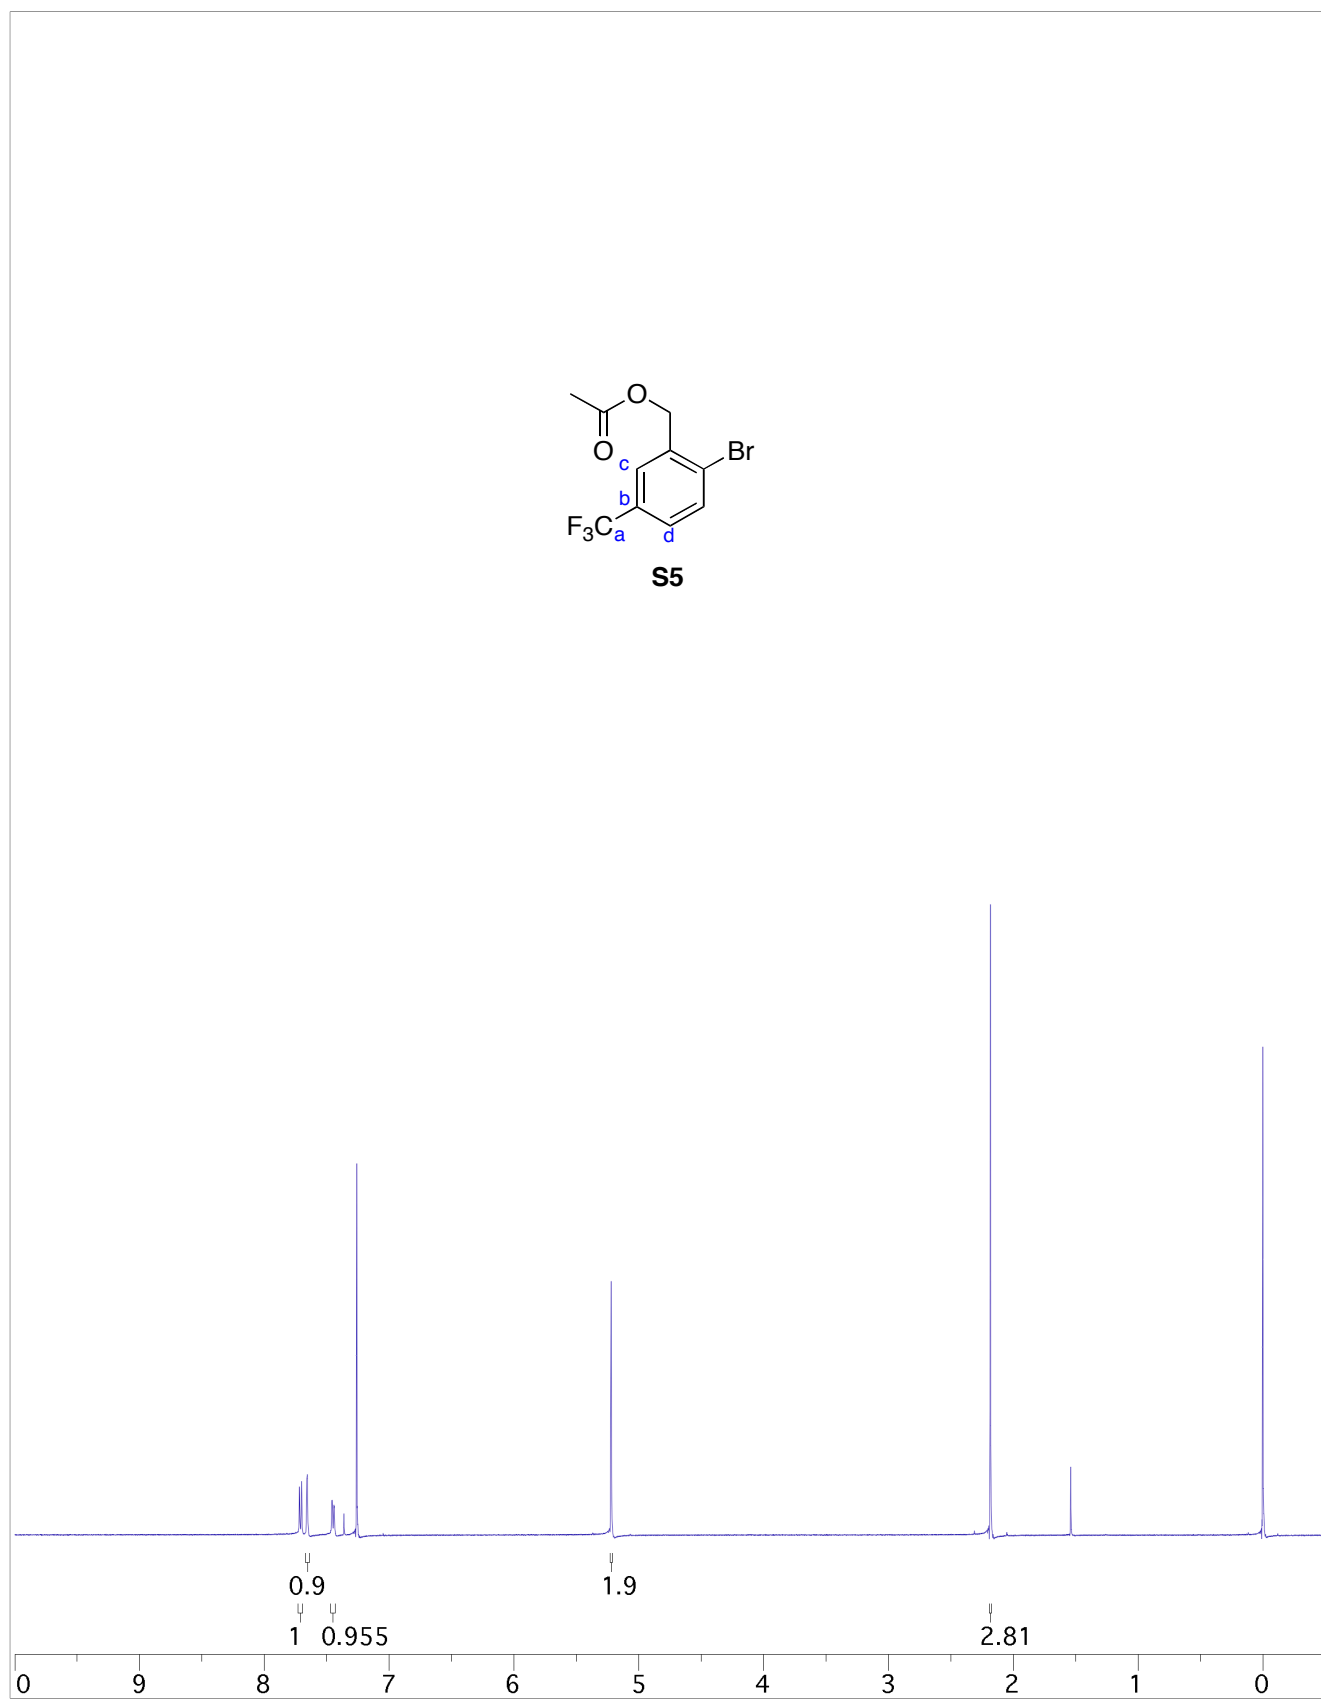

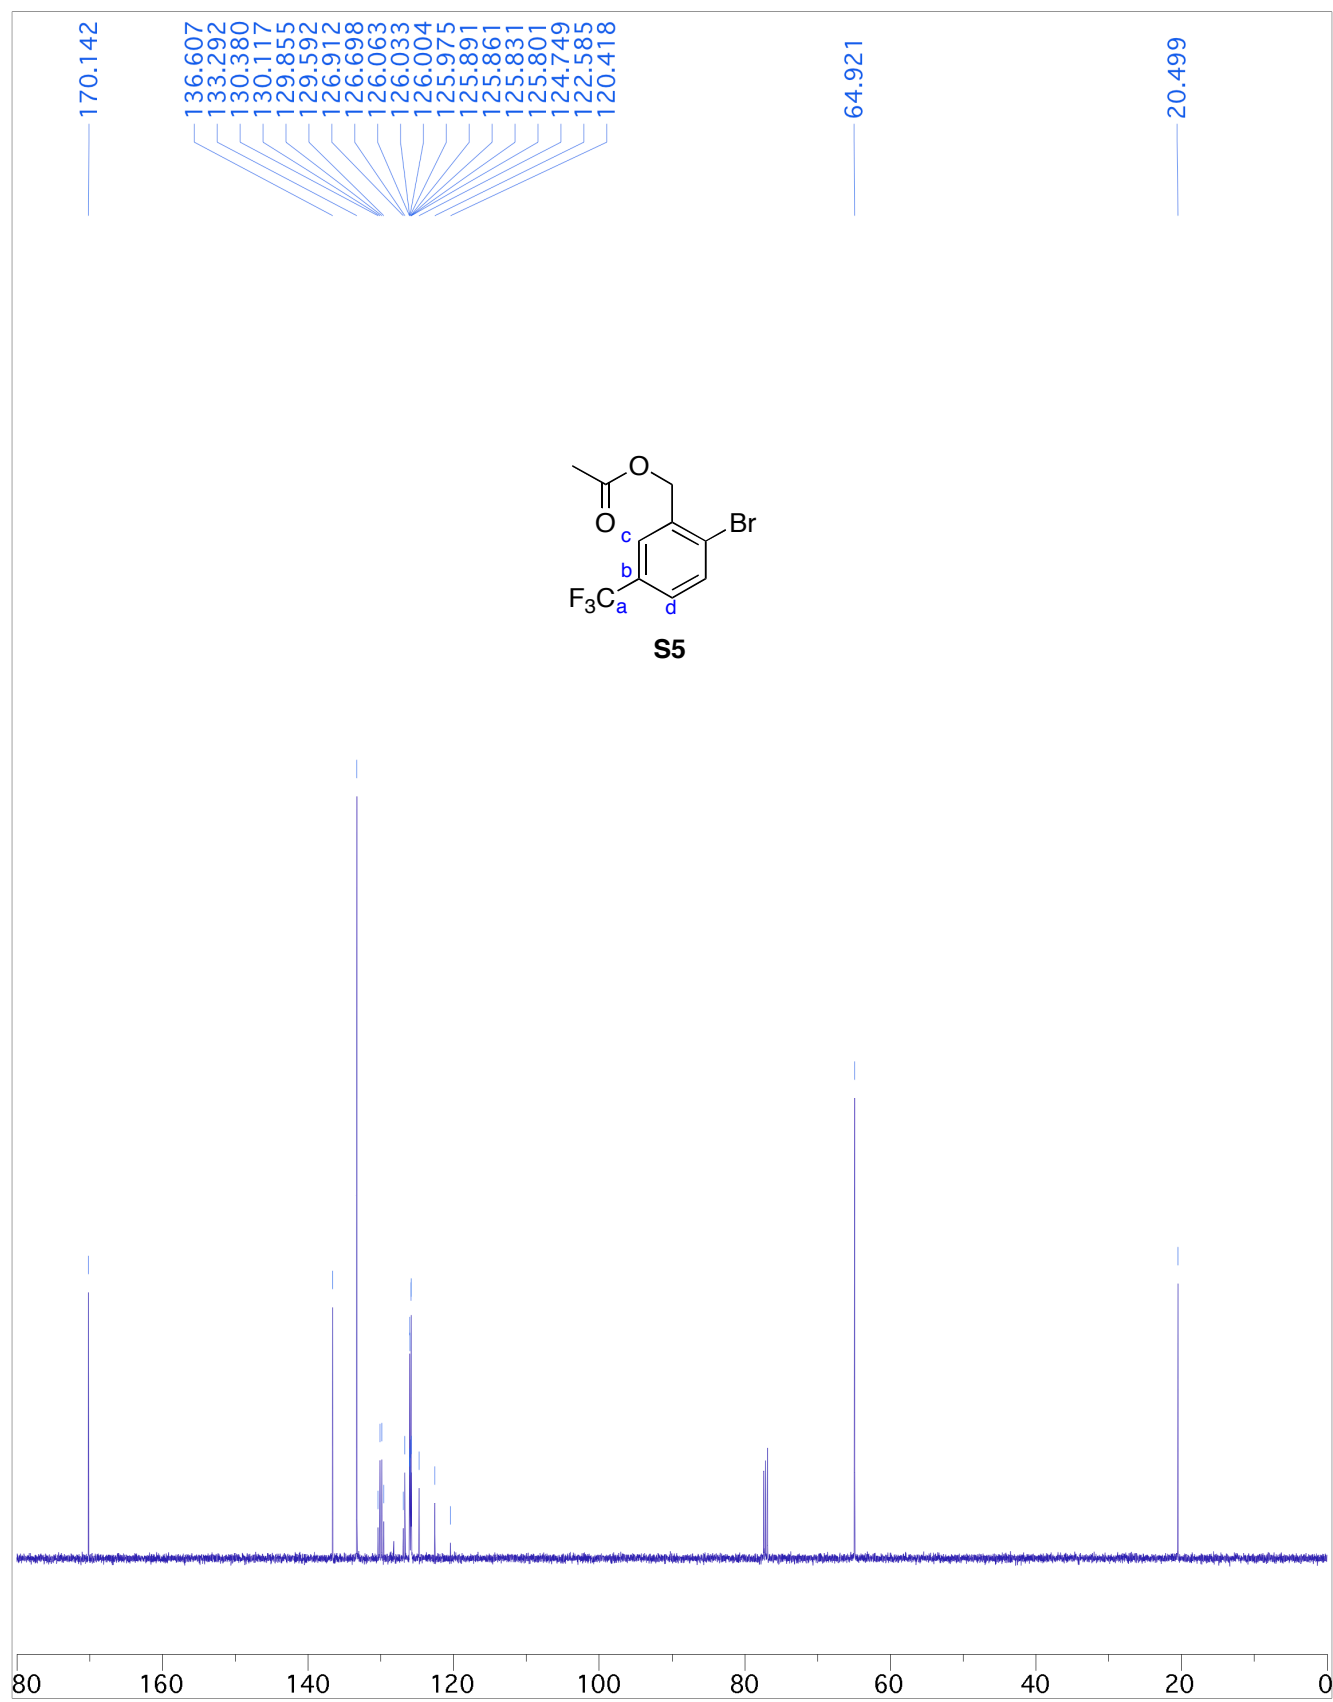

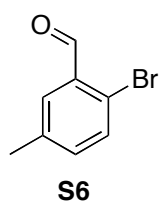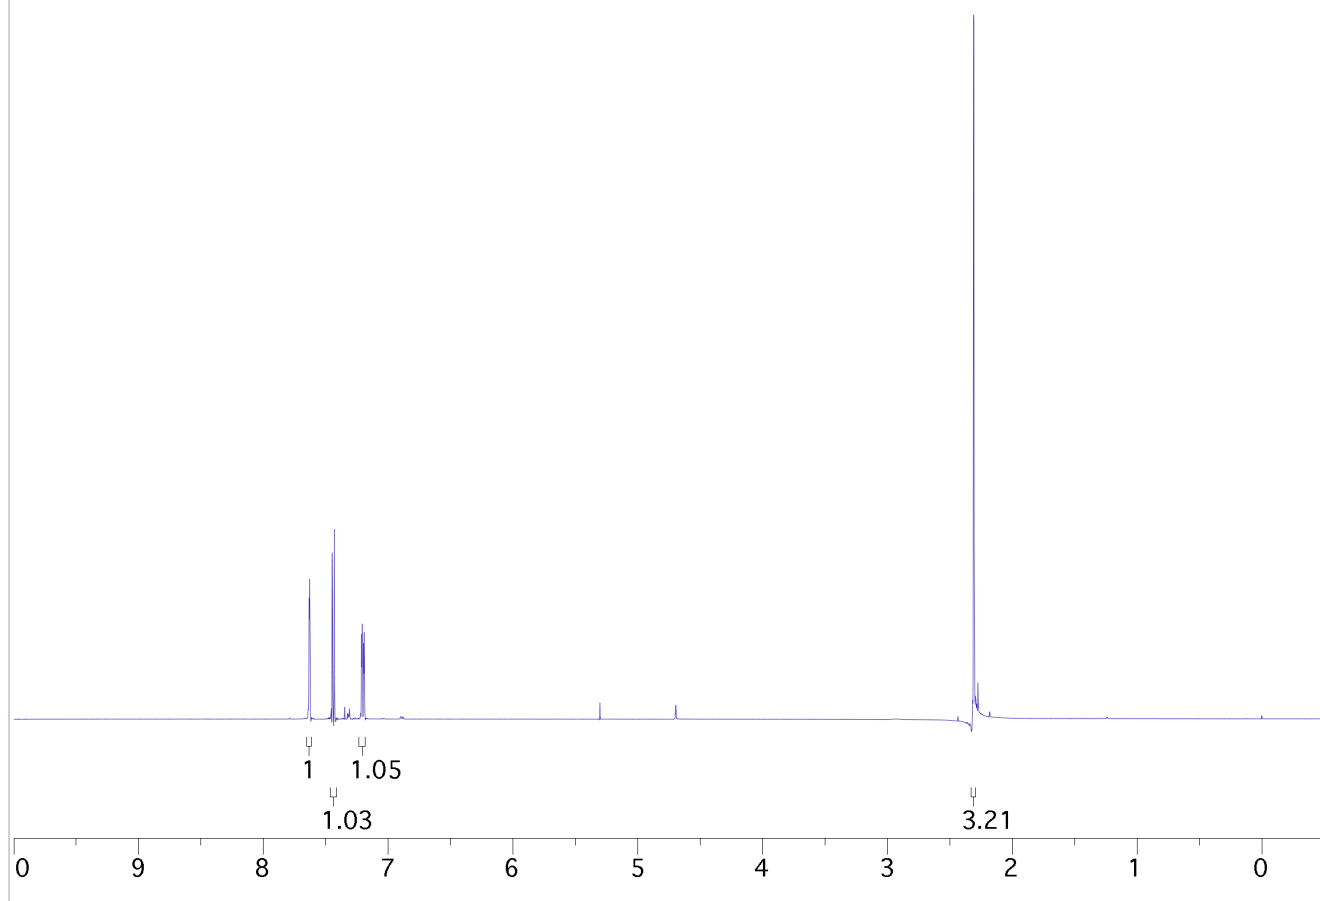

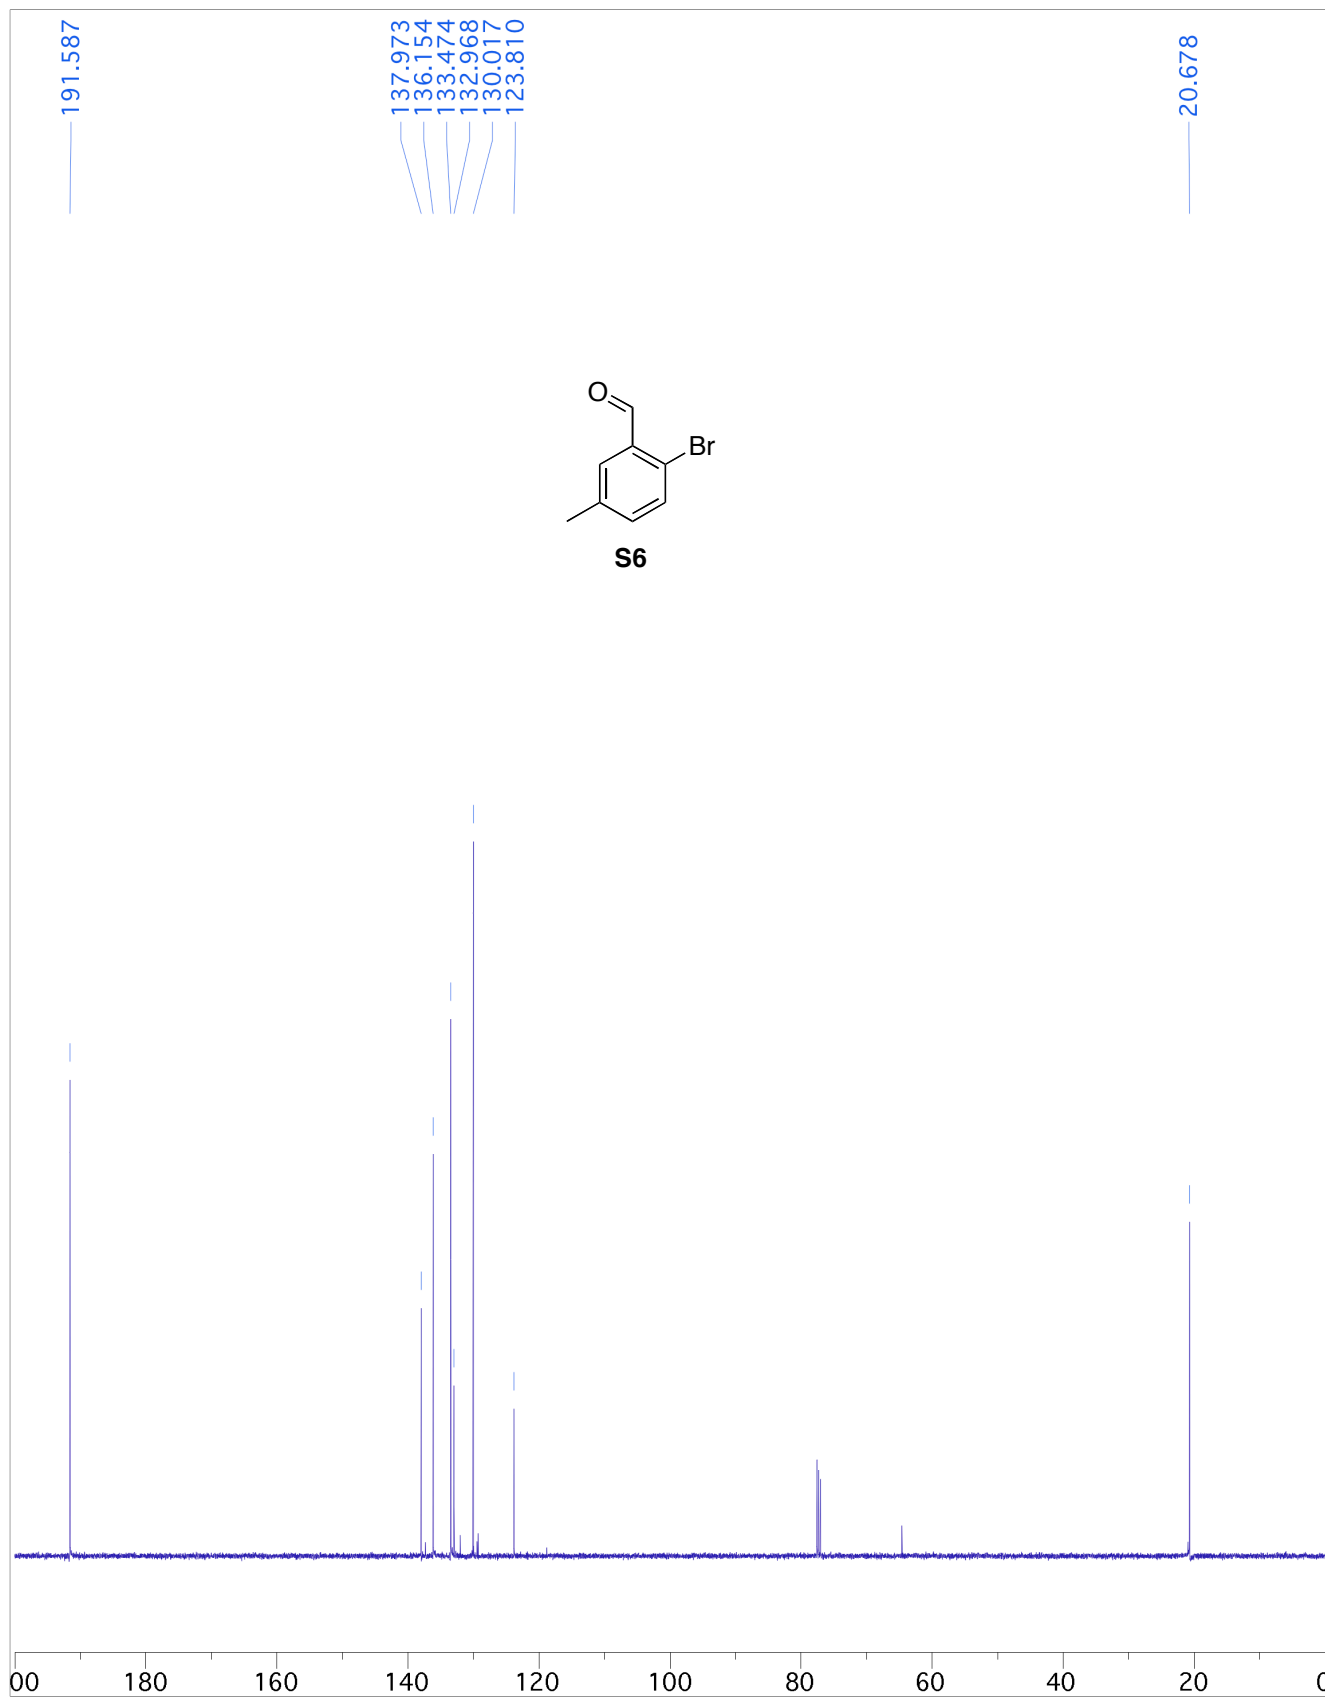

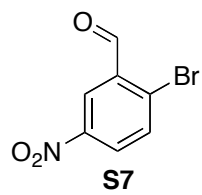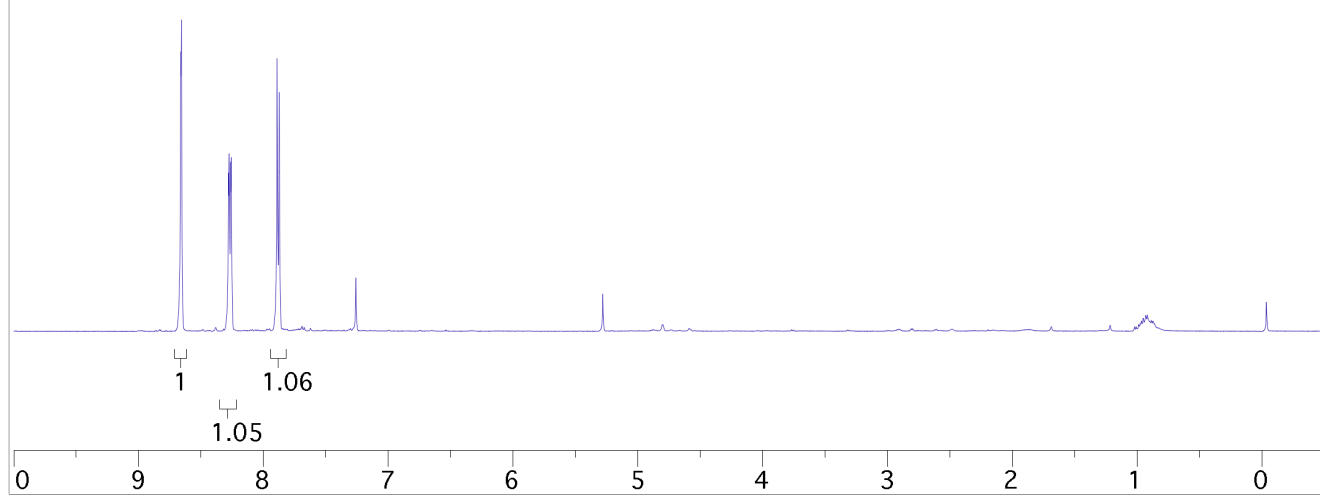

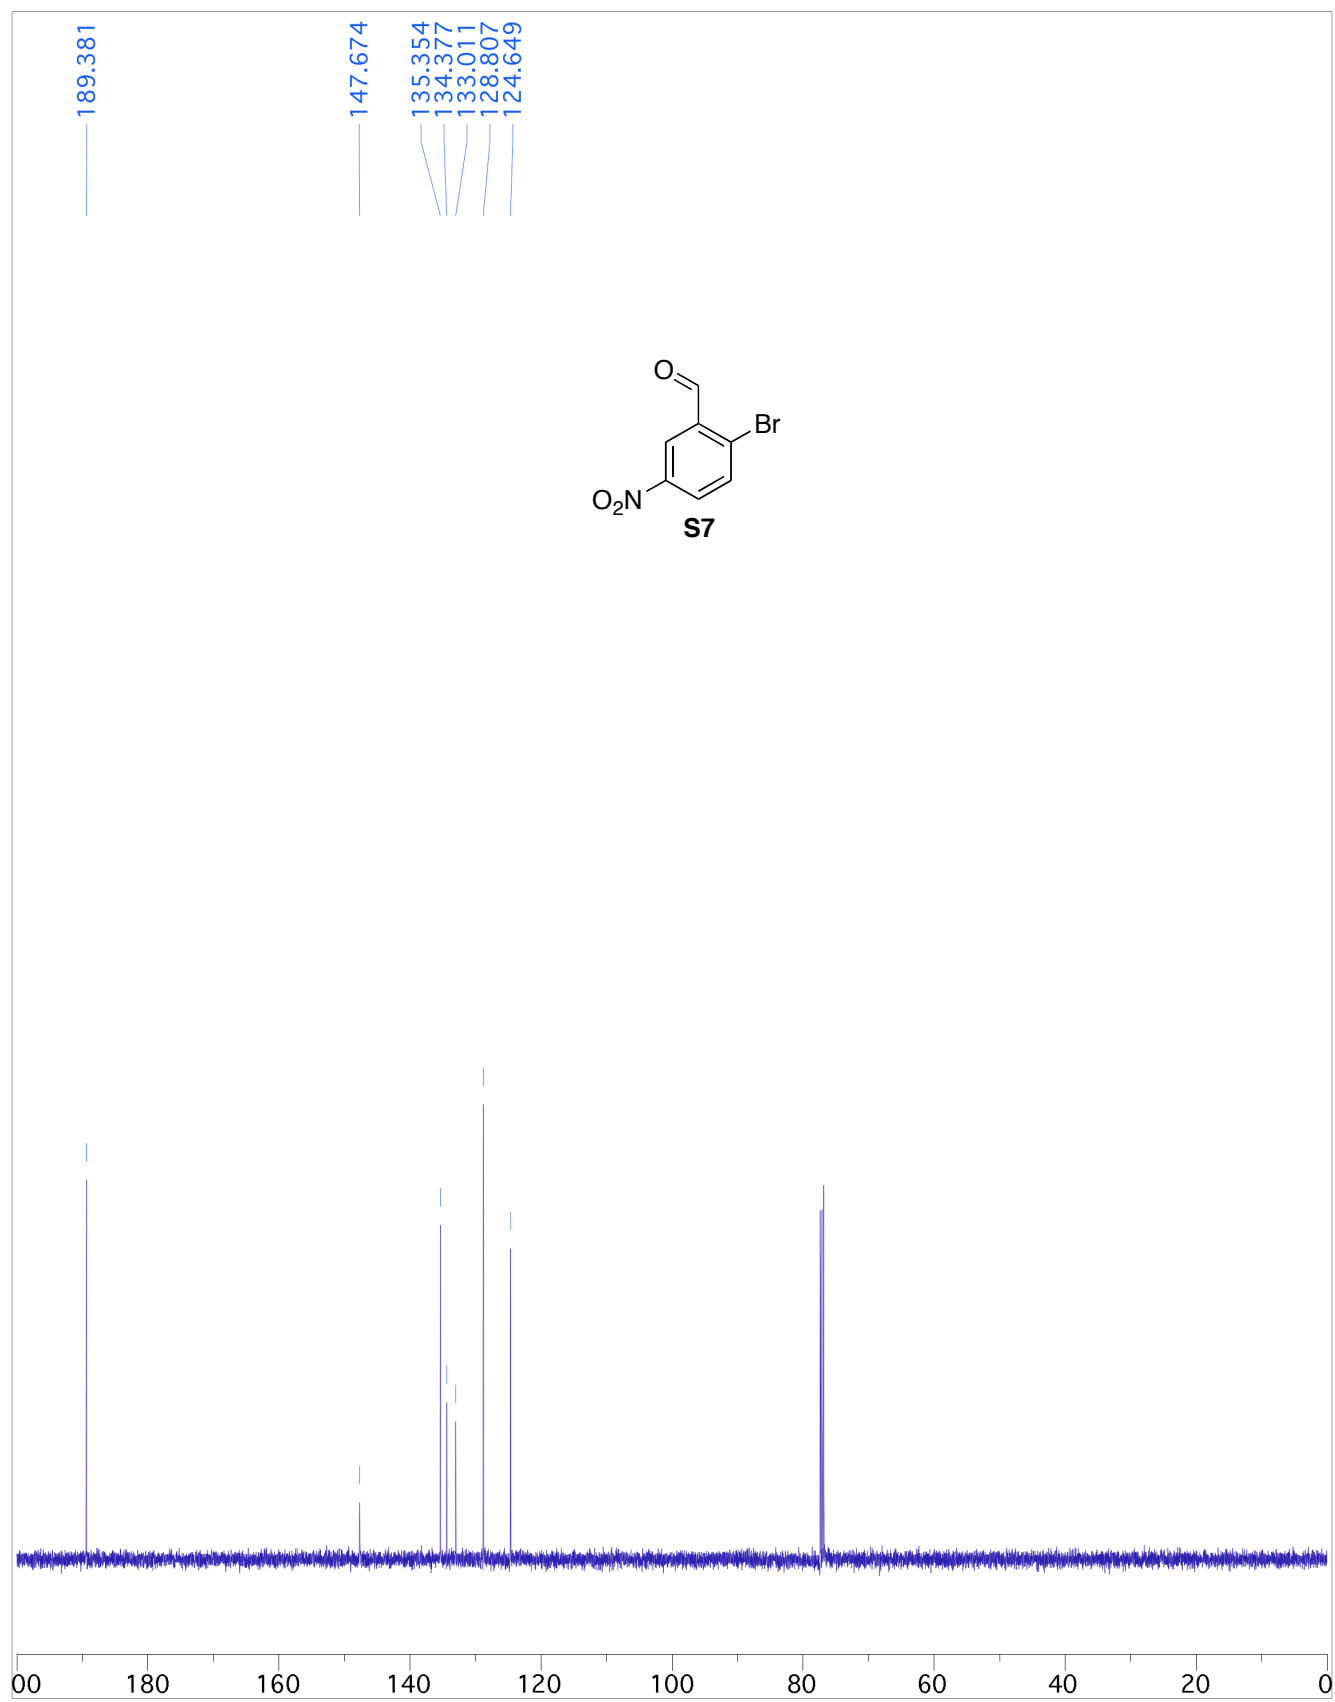

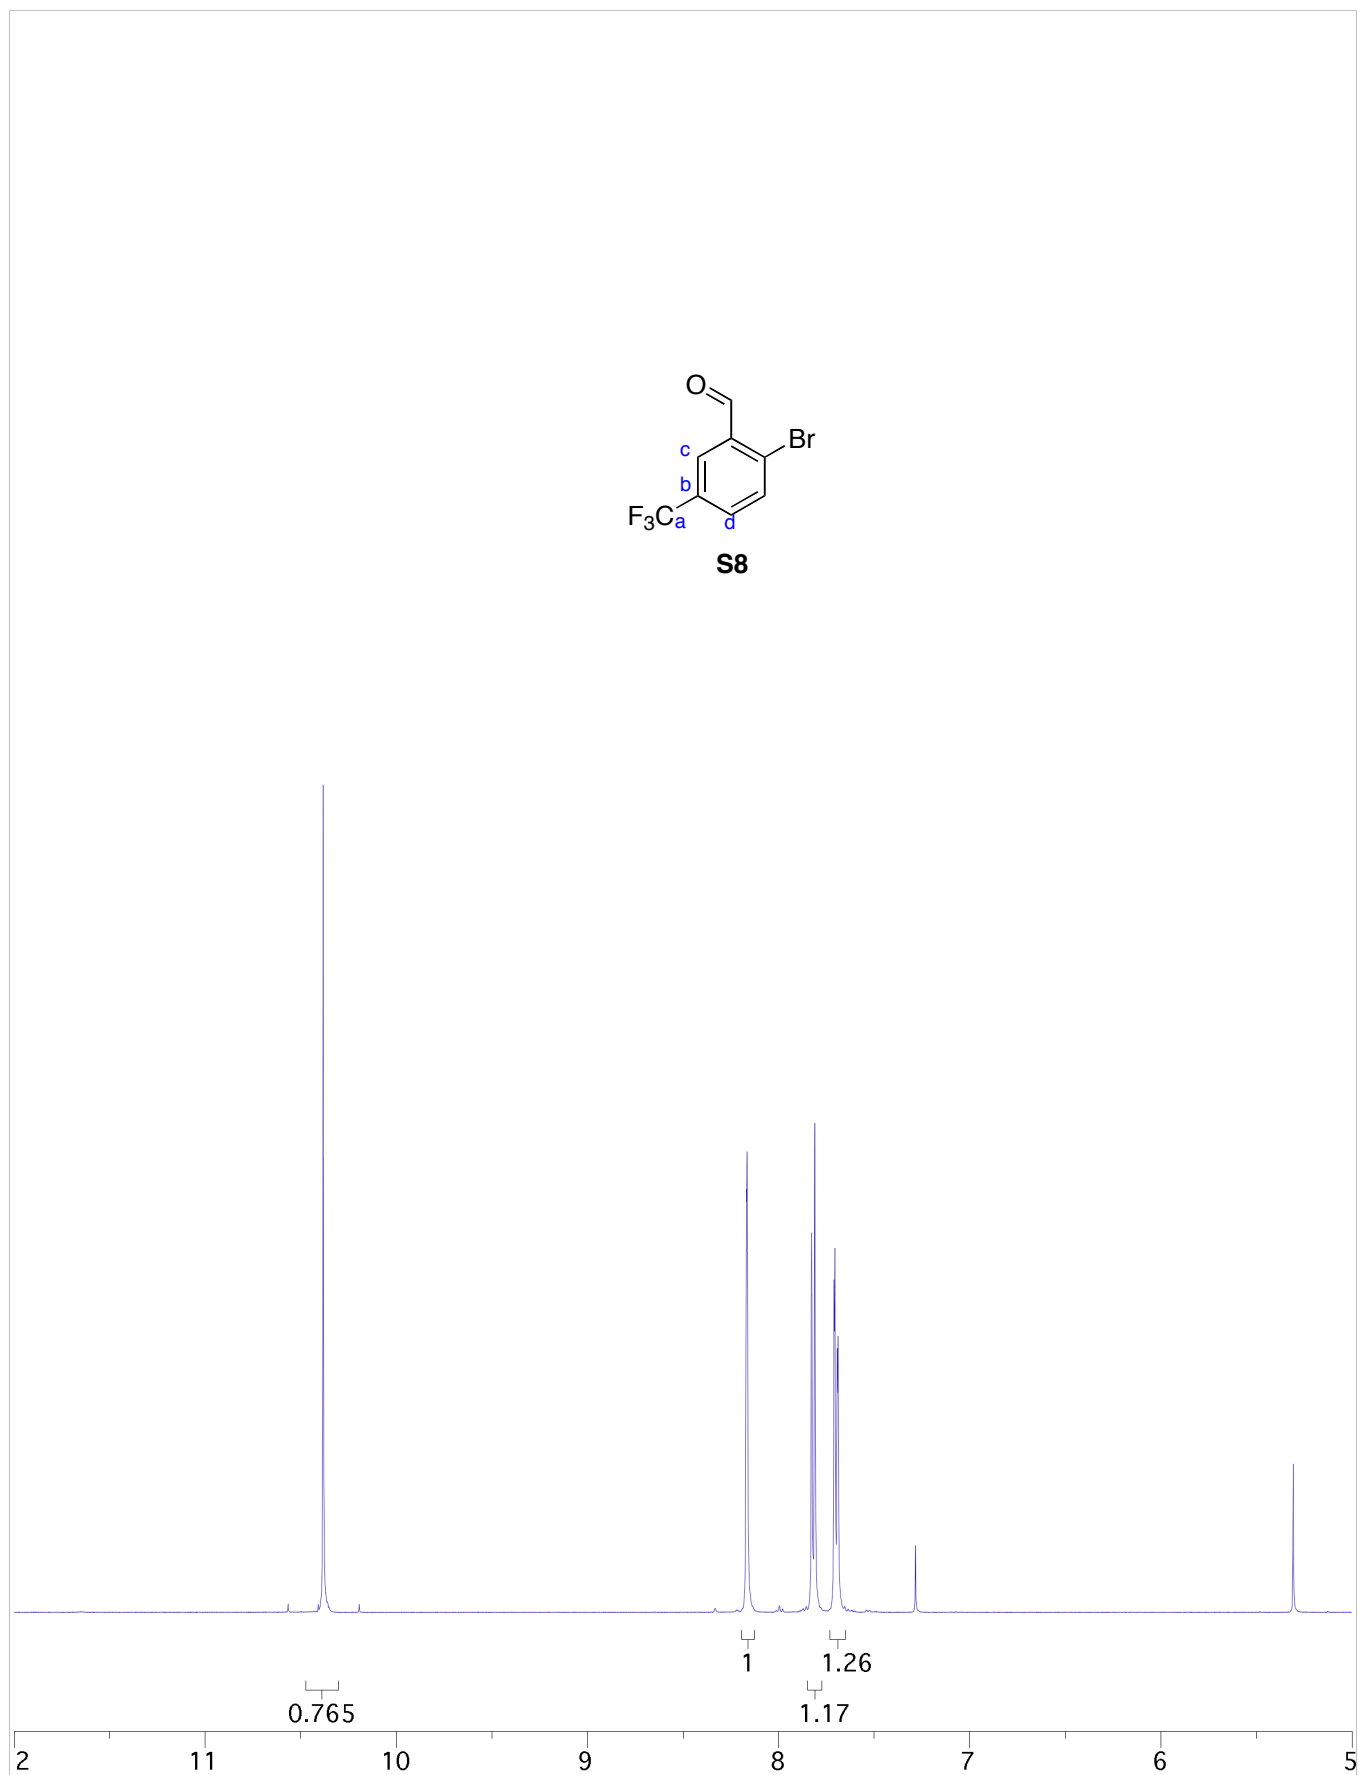



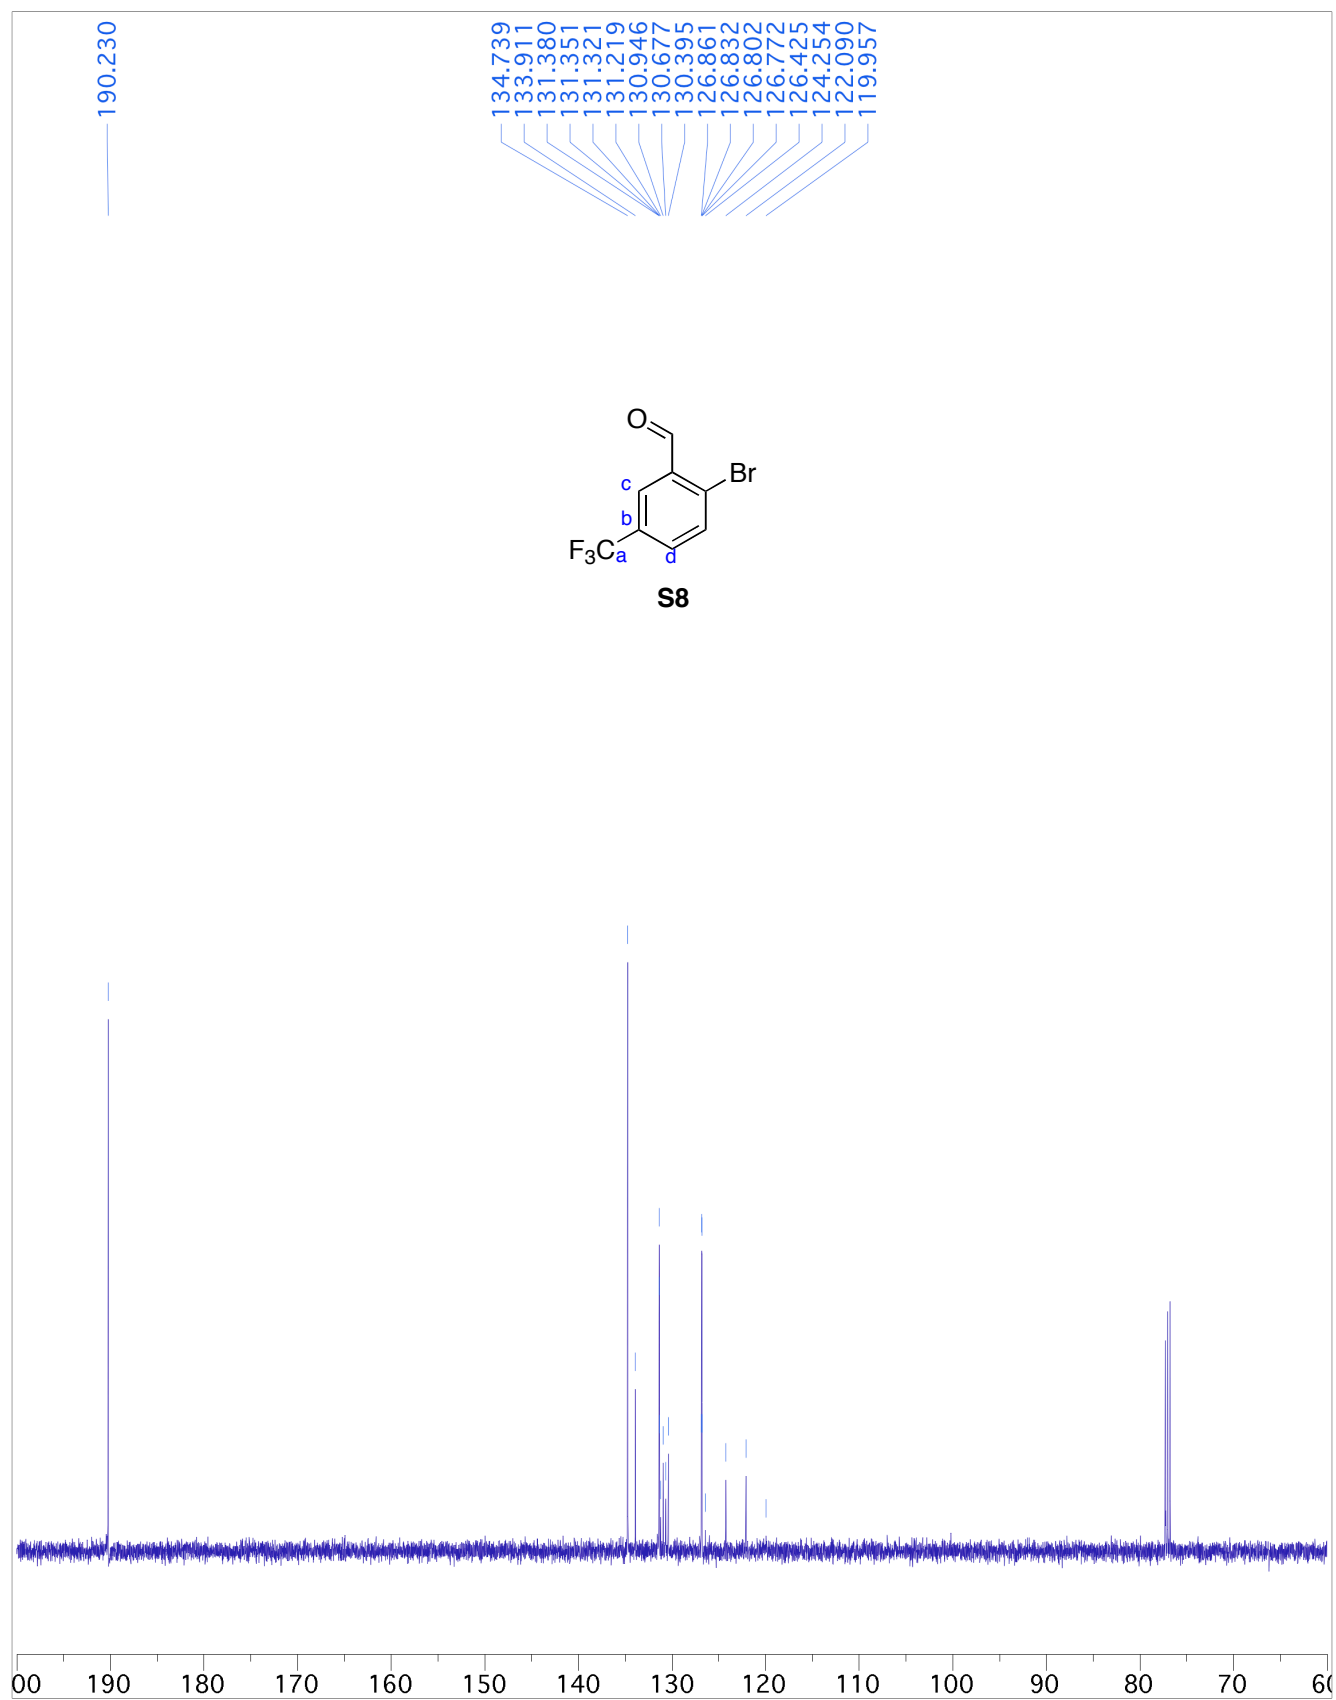

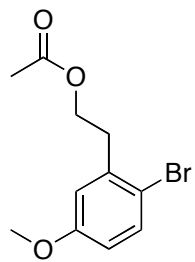**S11**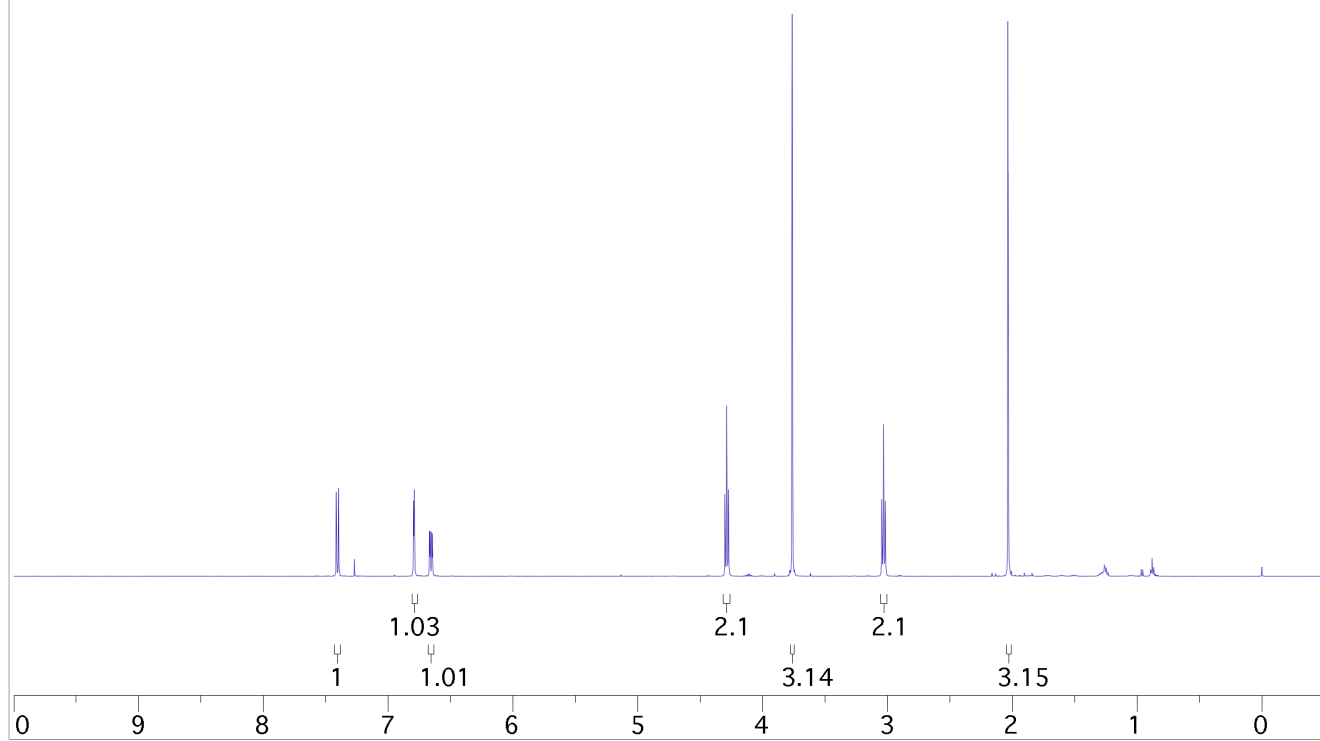

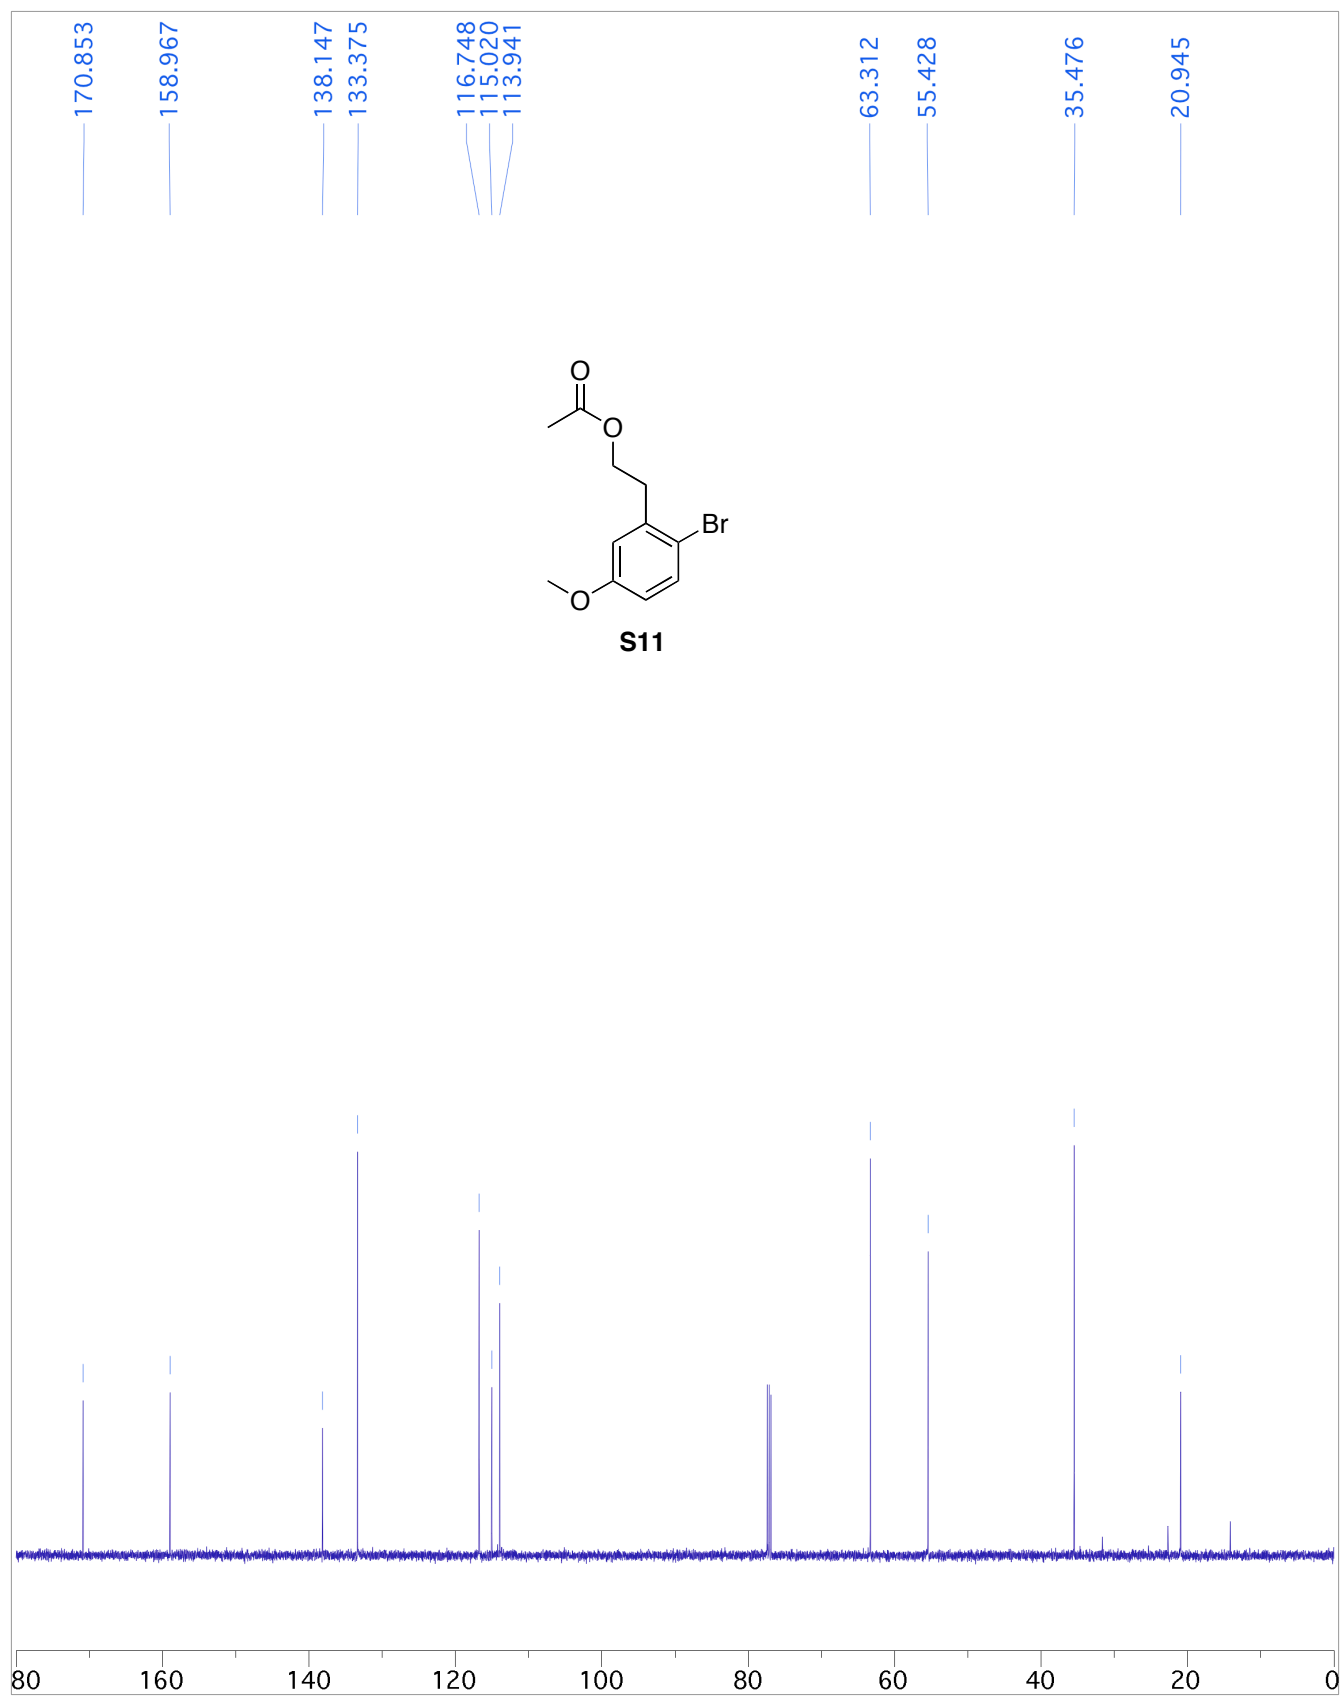

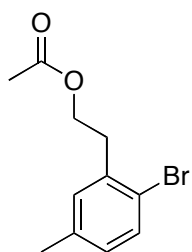

**S12**

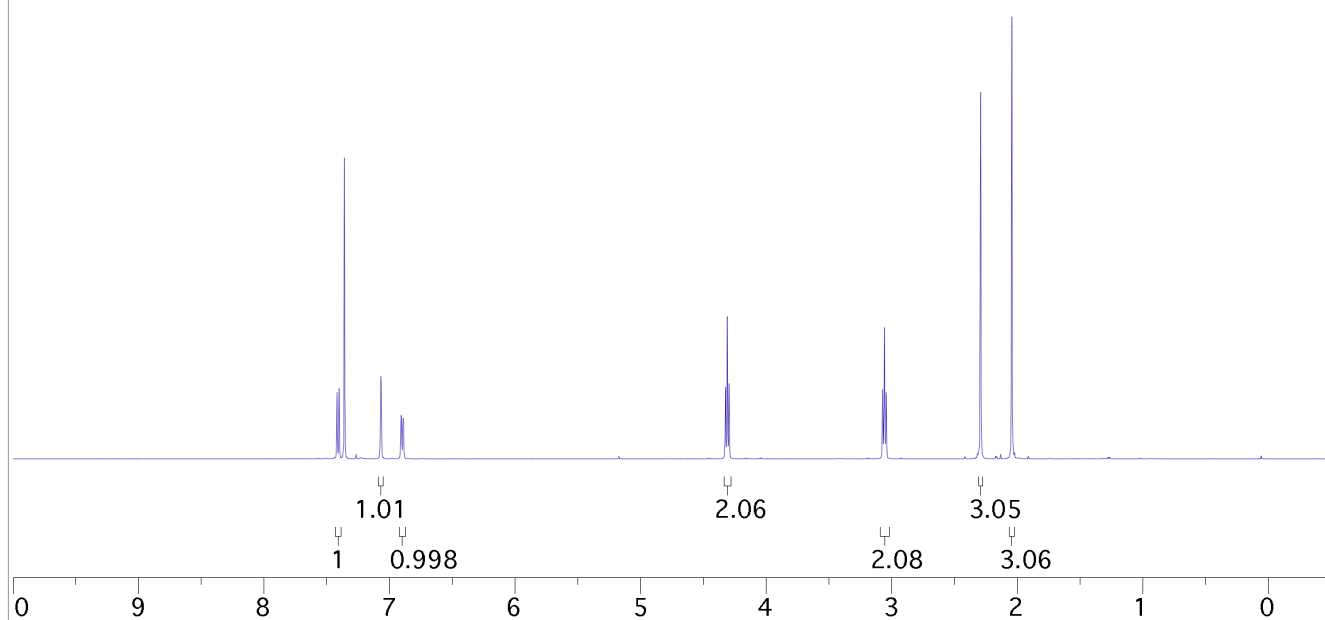

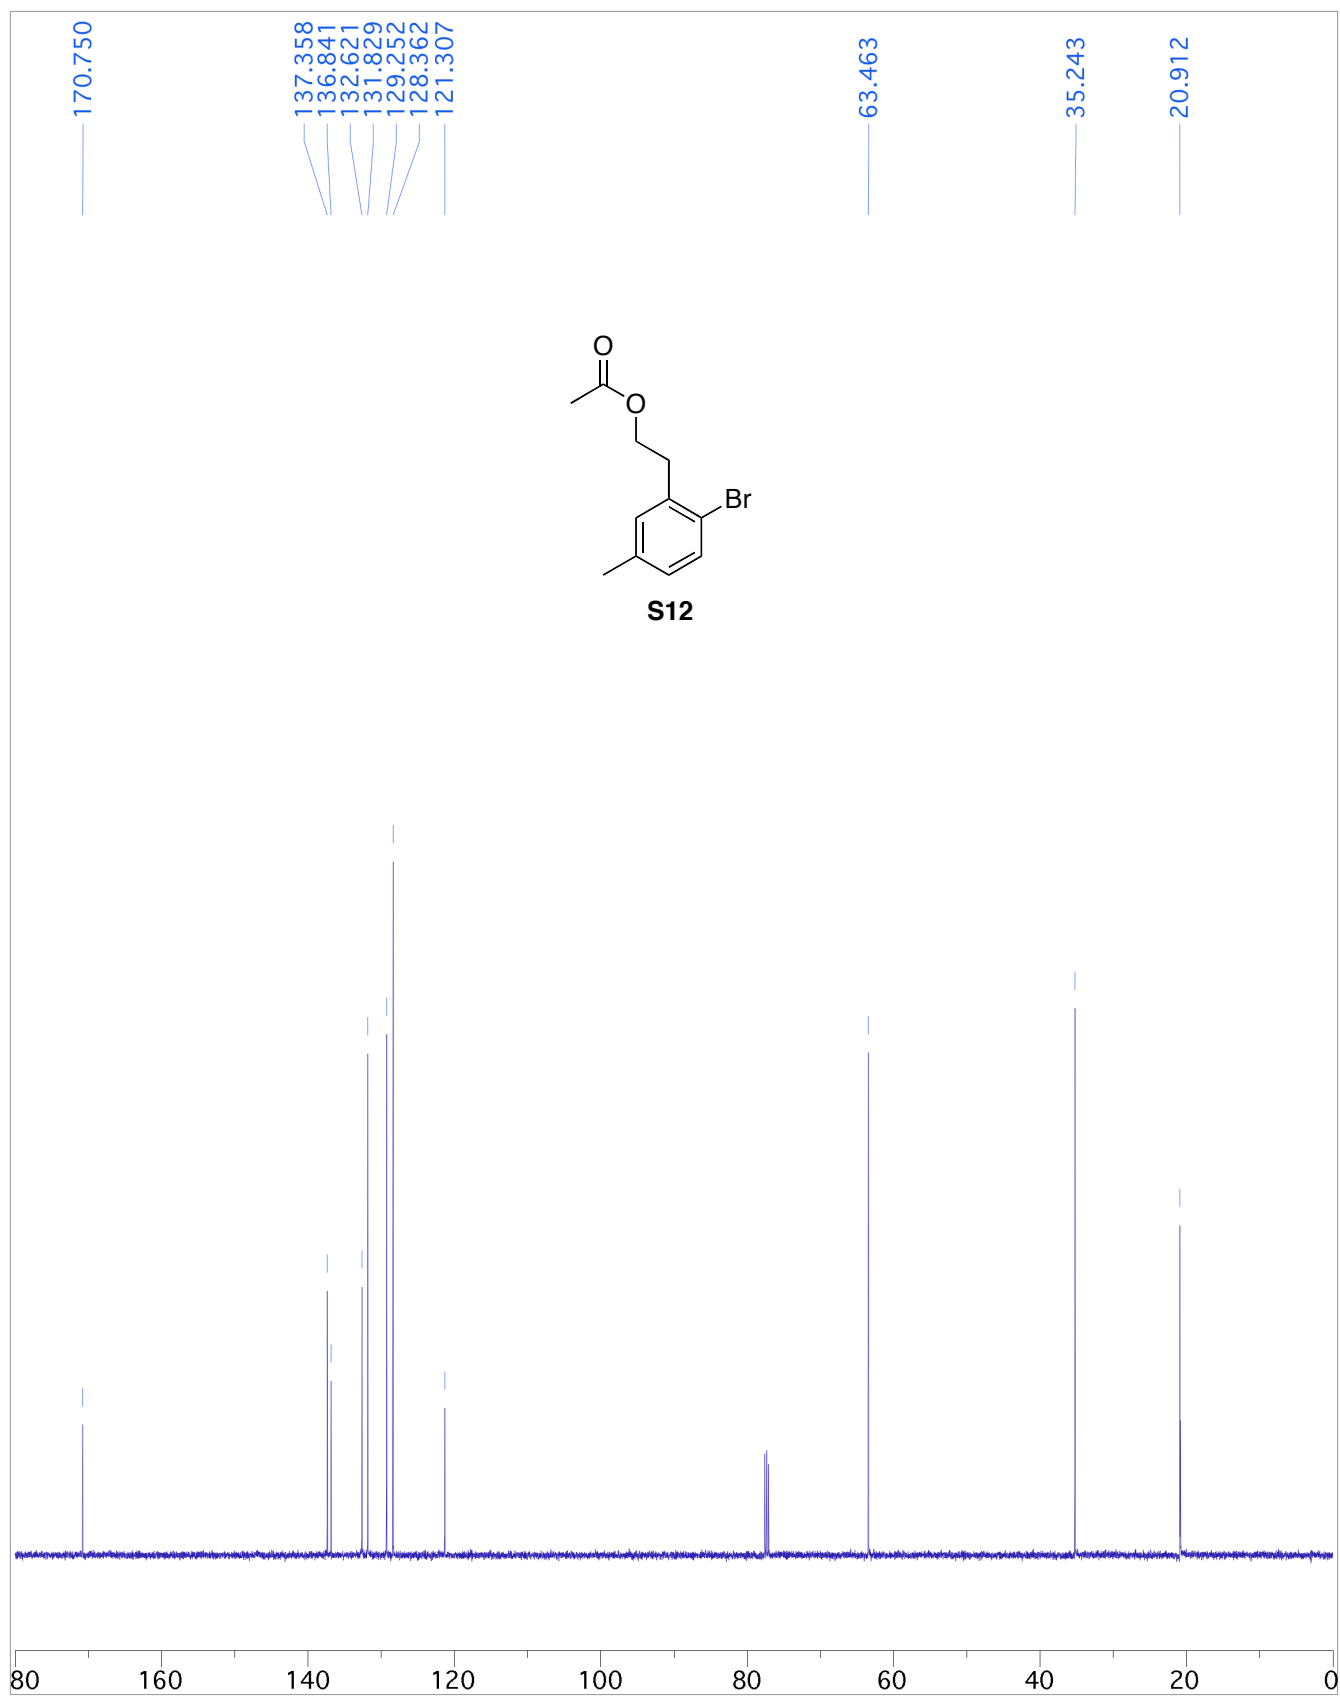

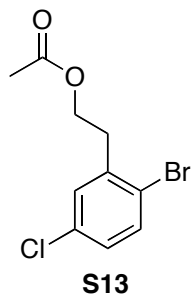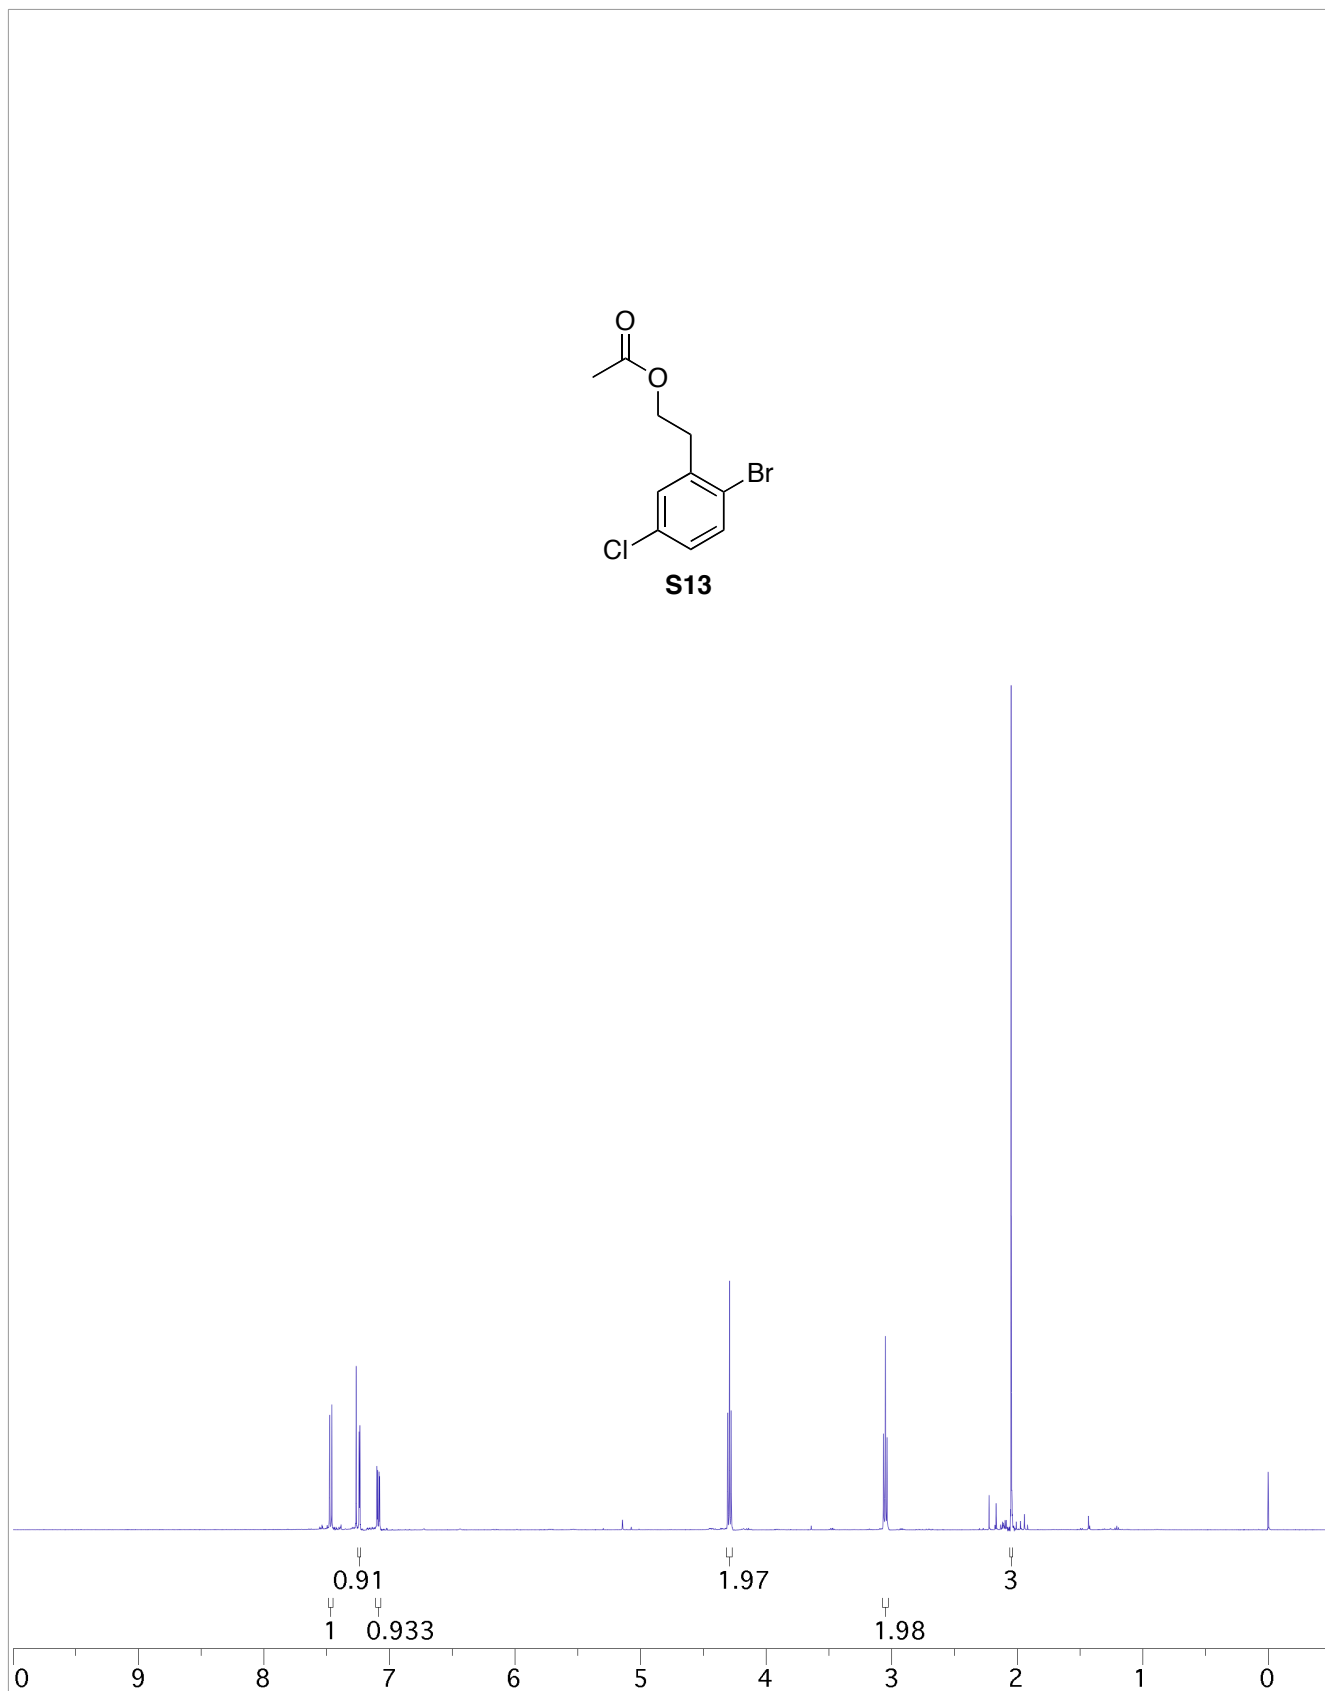

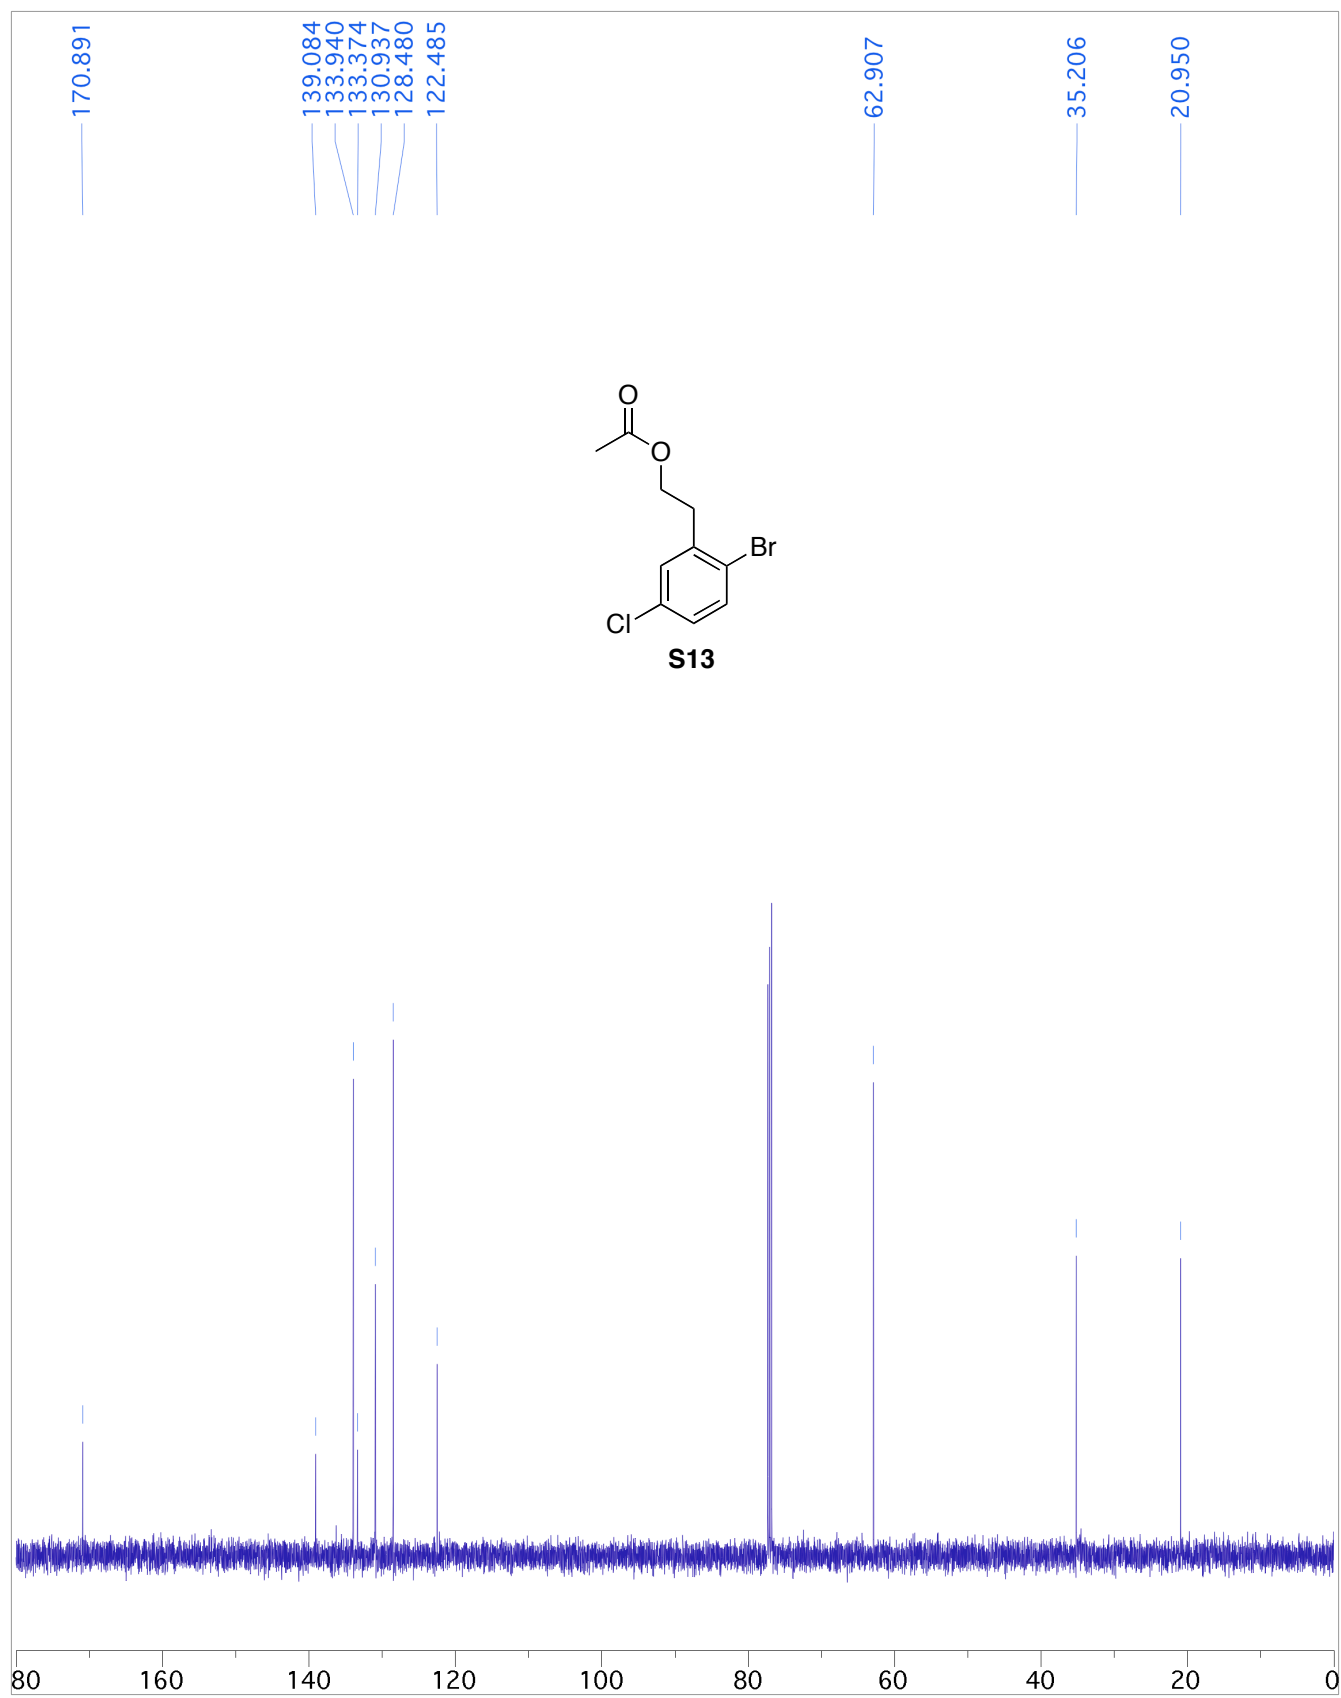

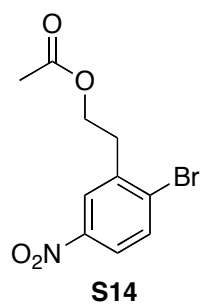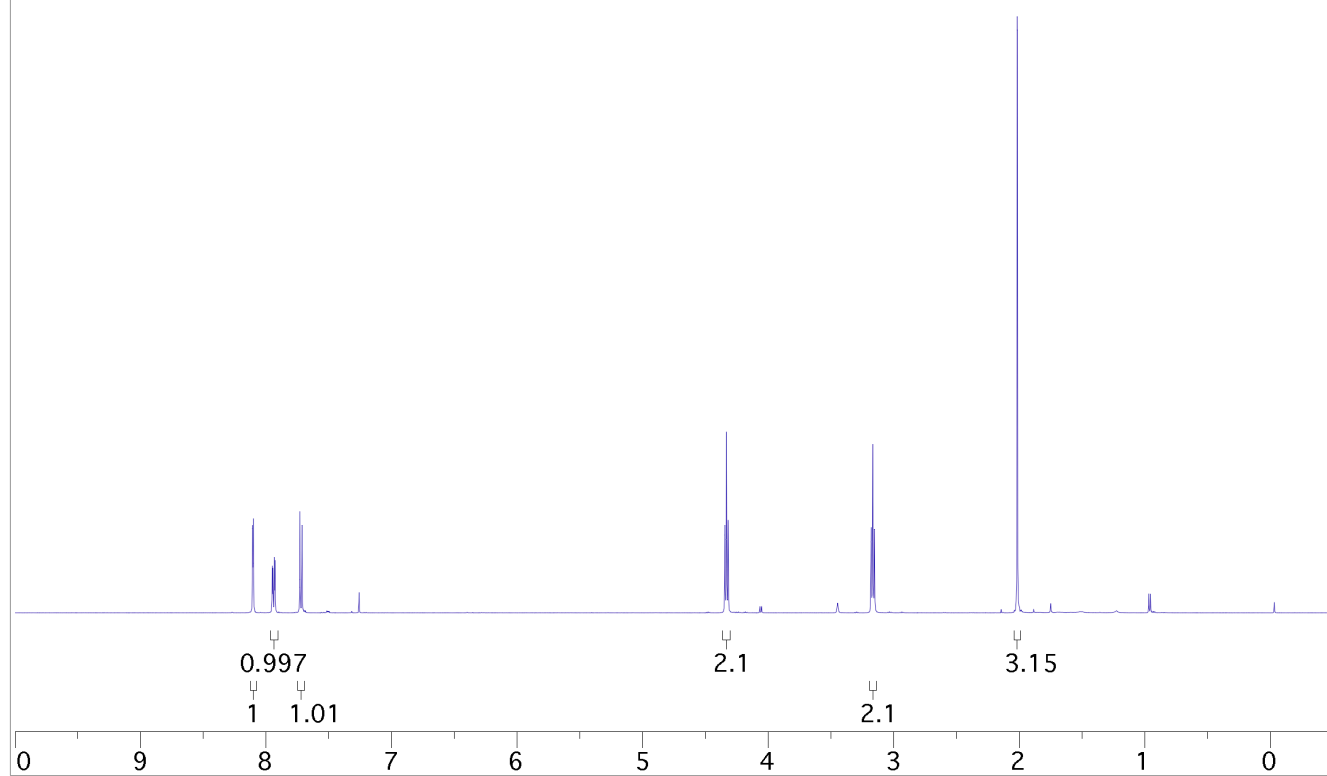



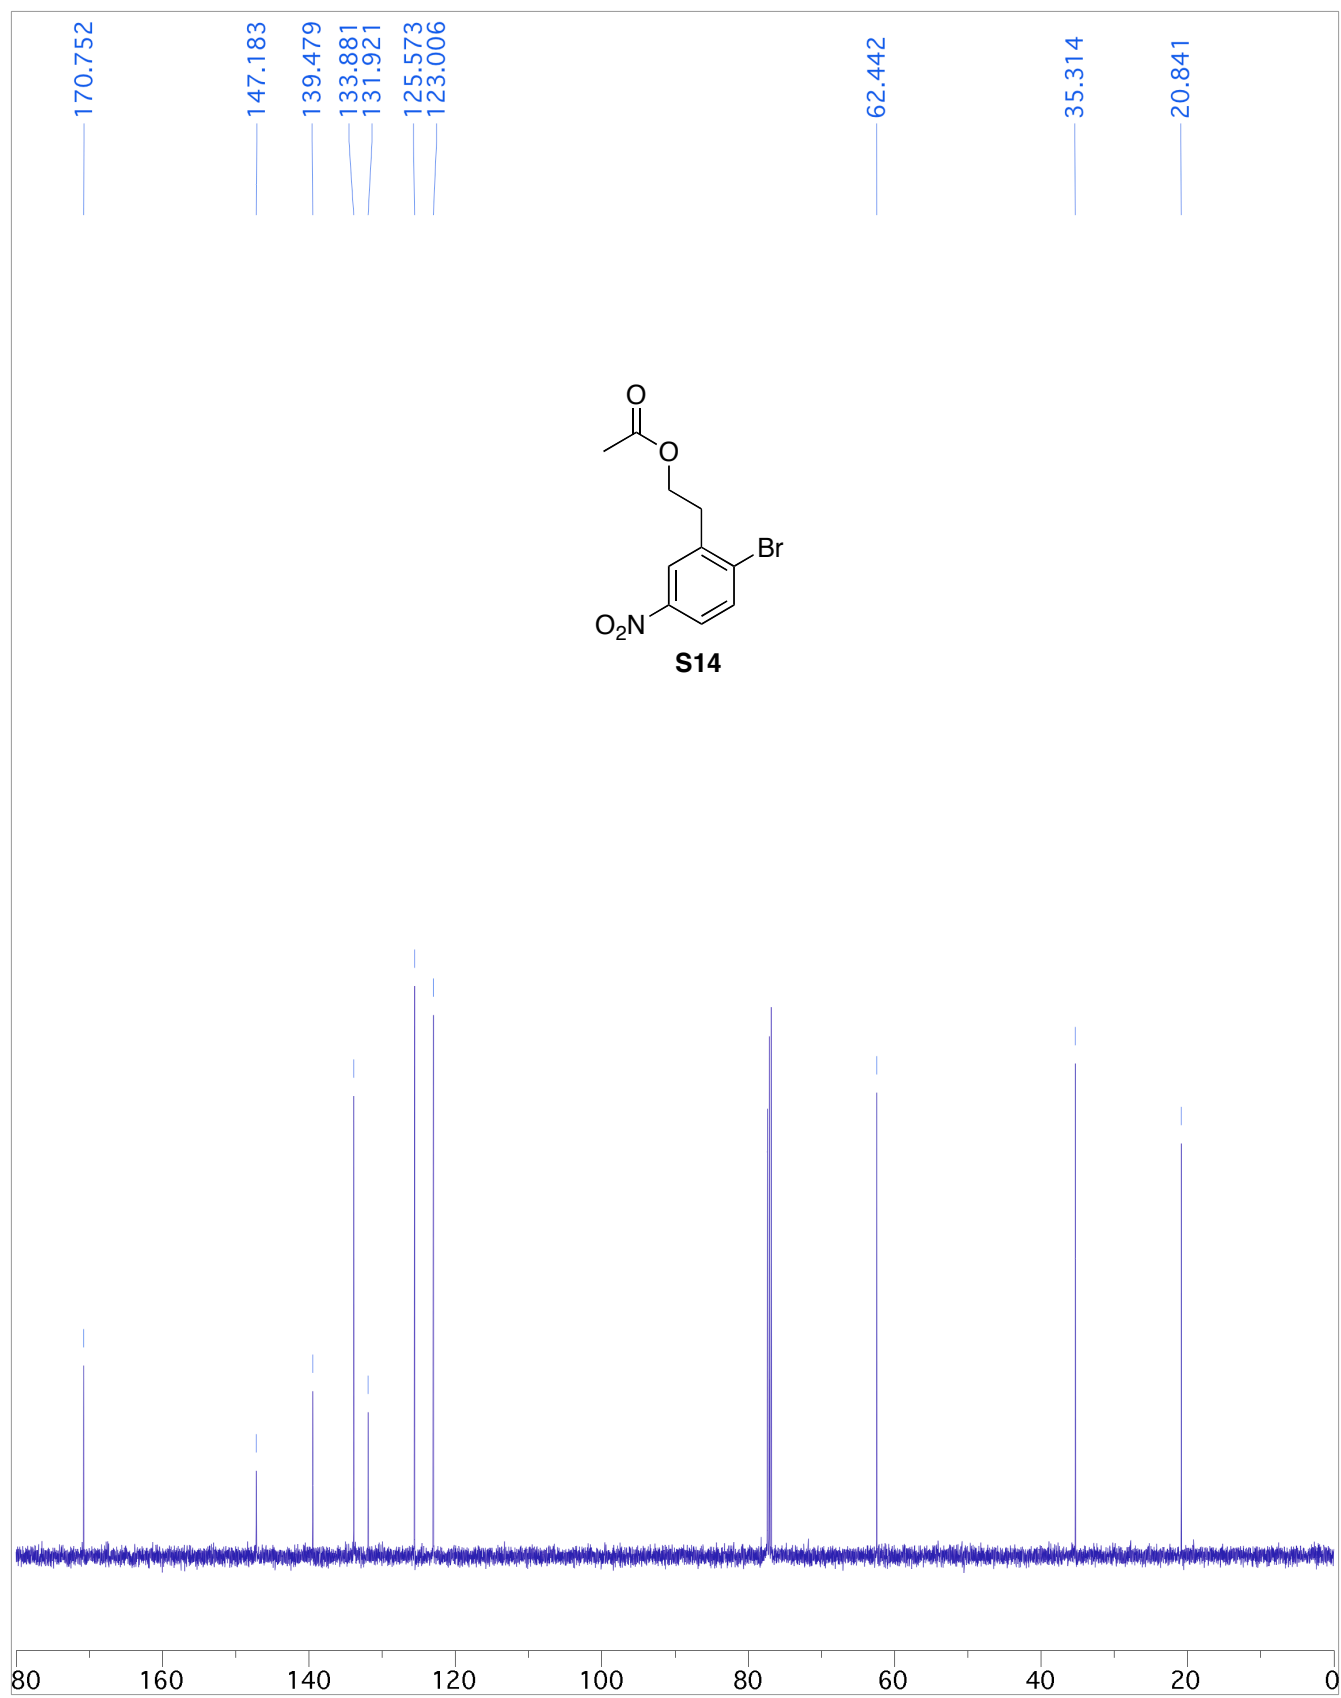

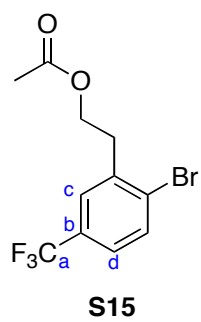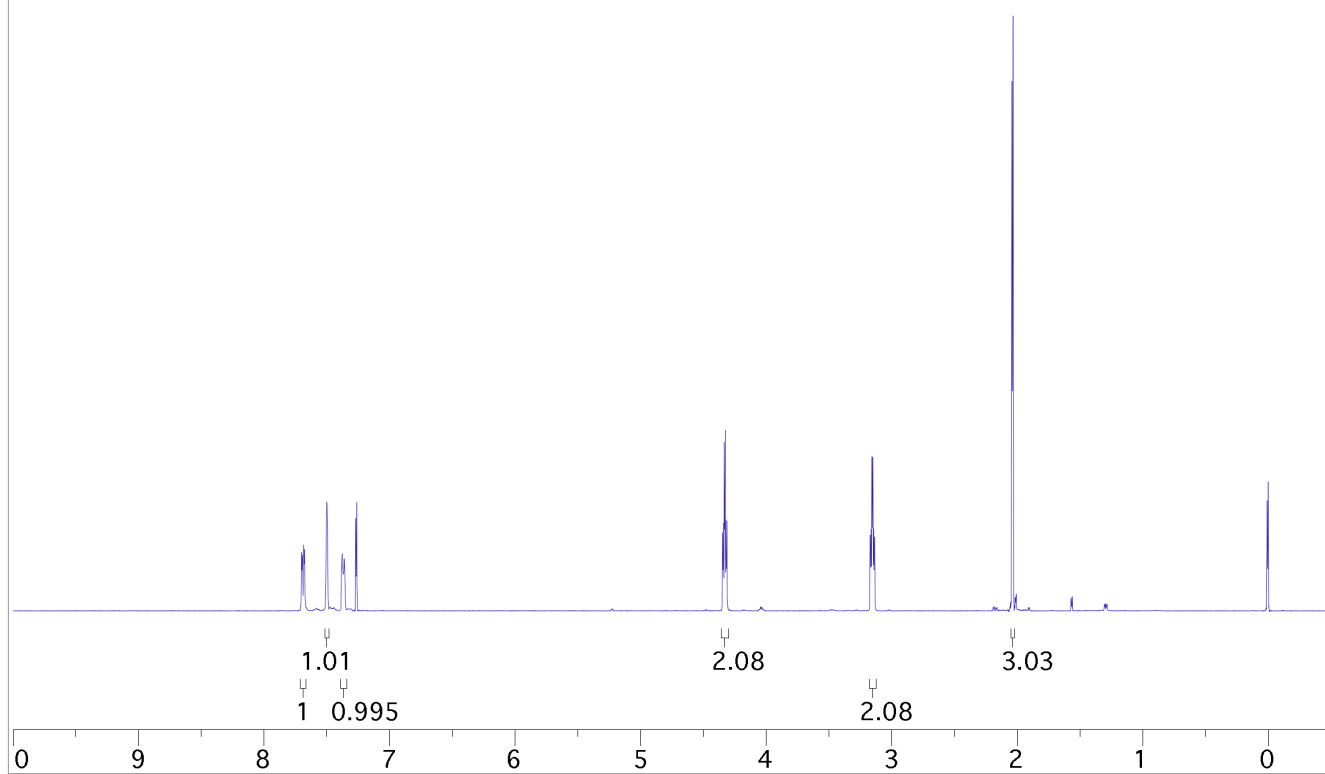

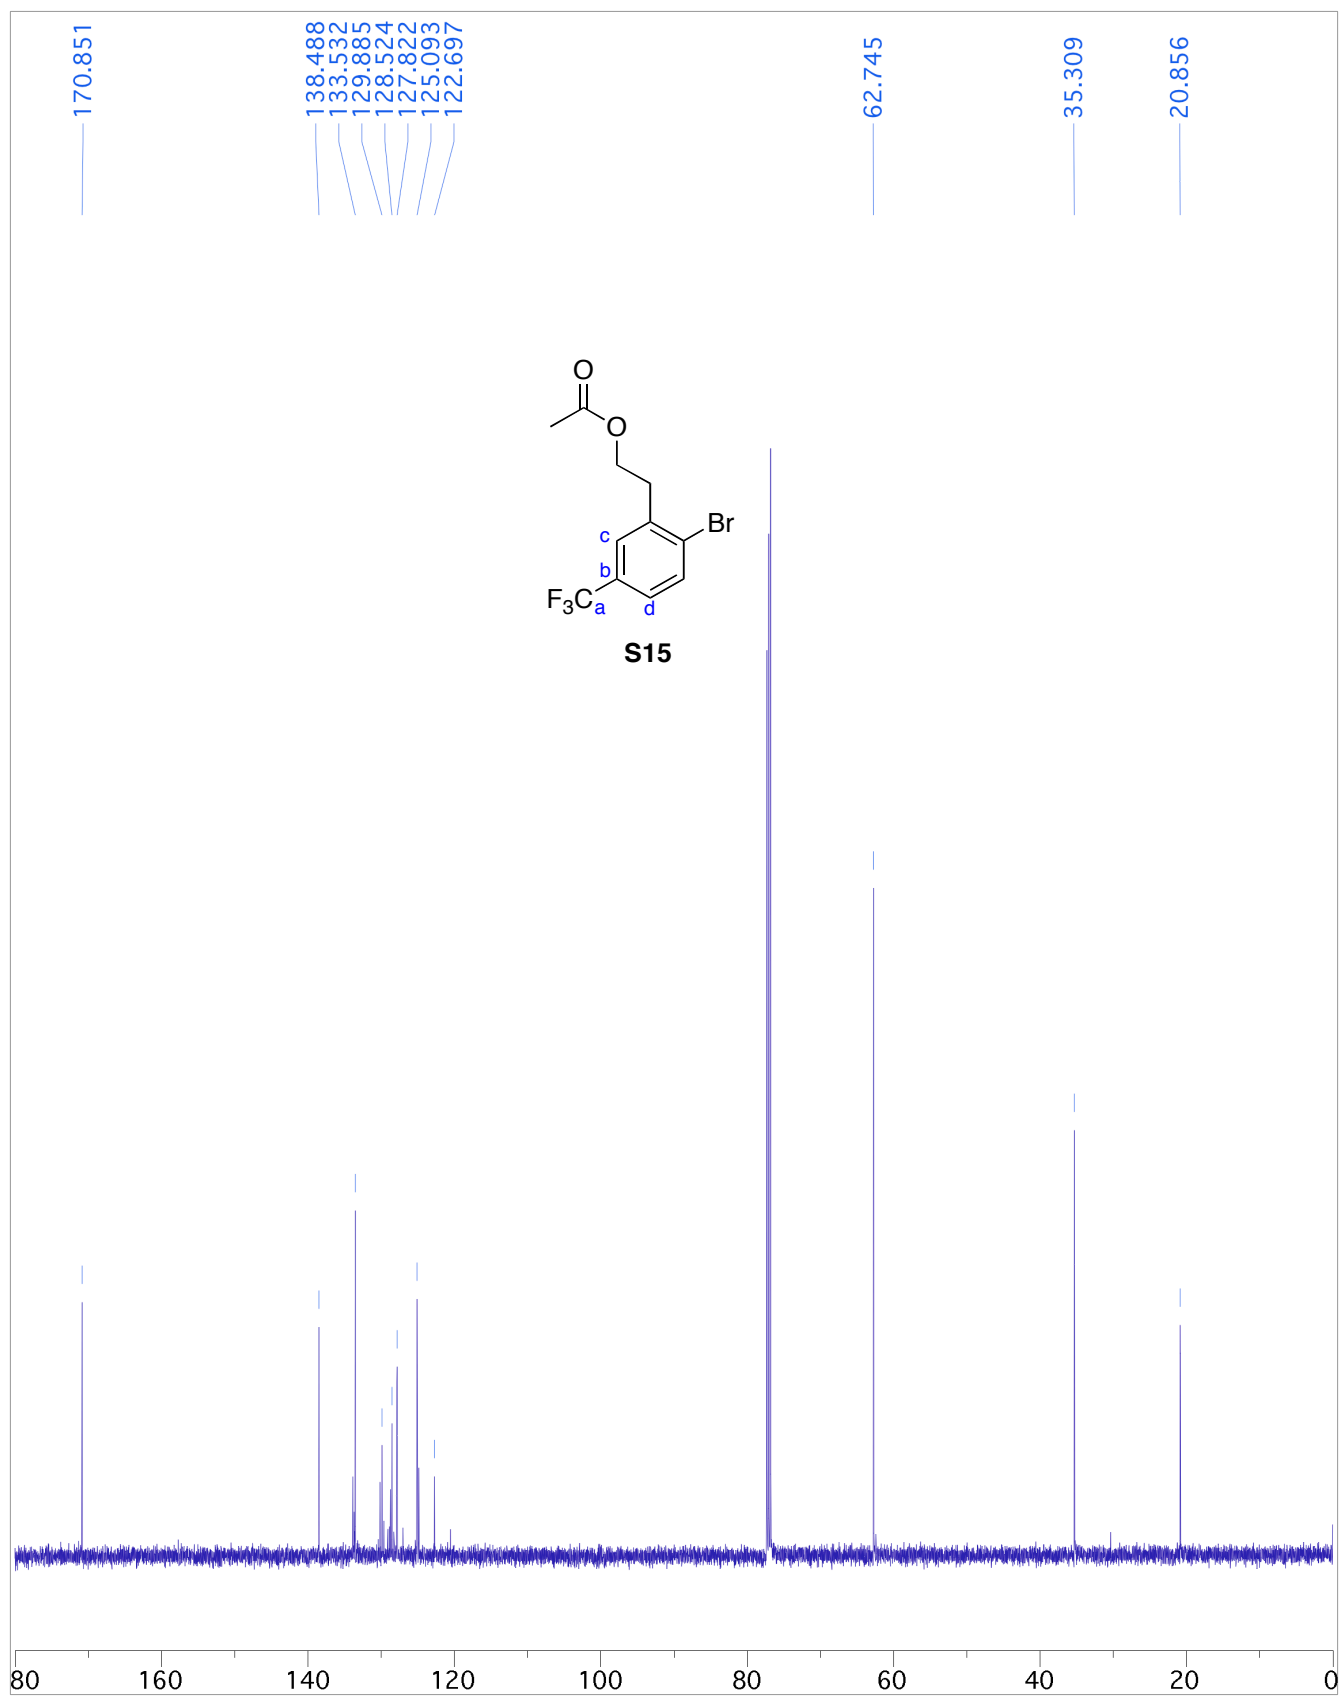

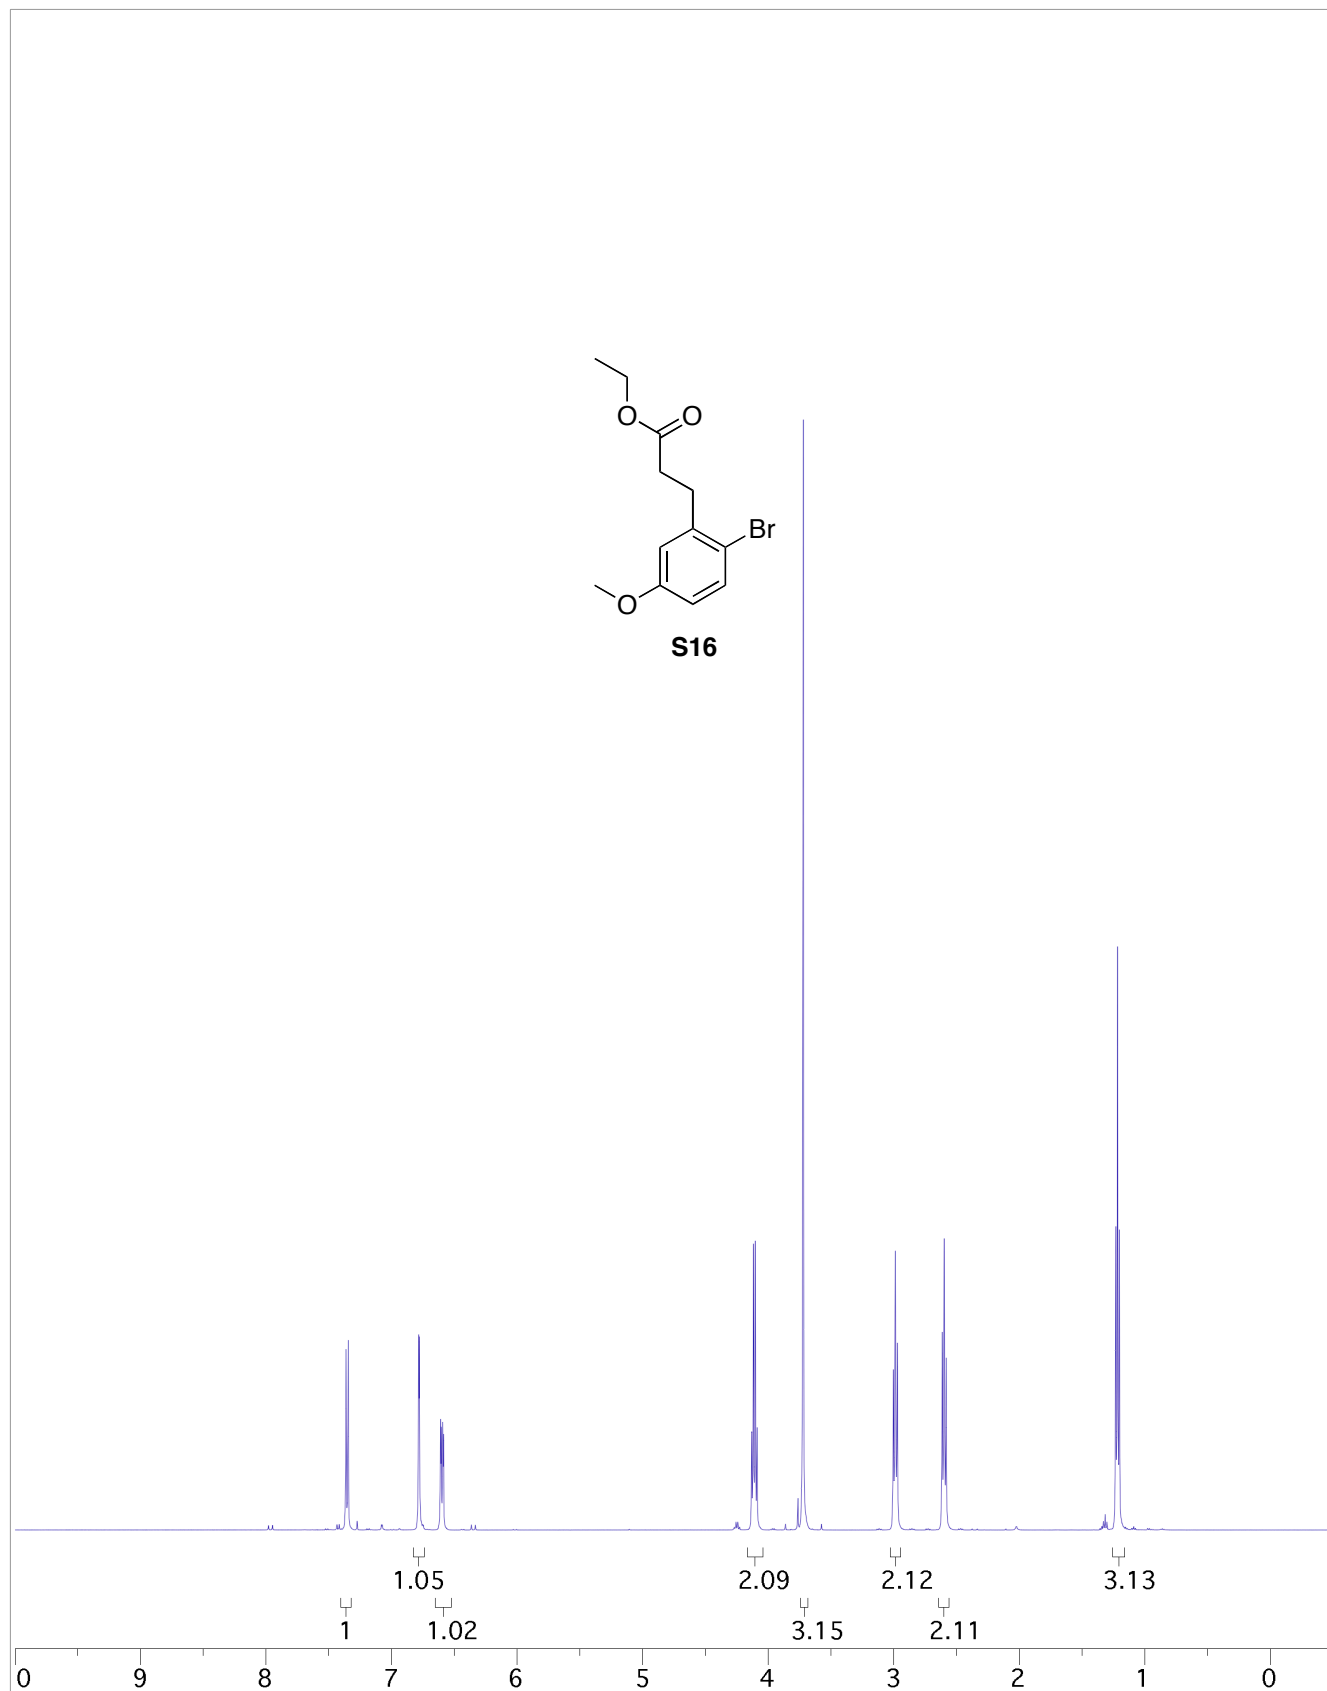

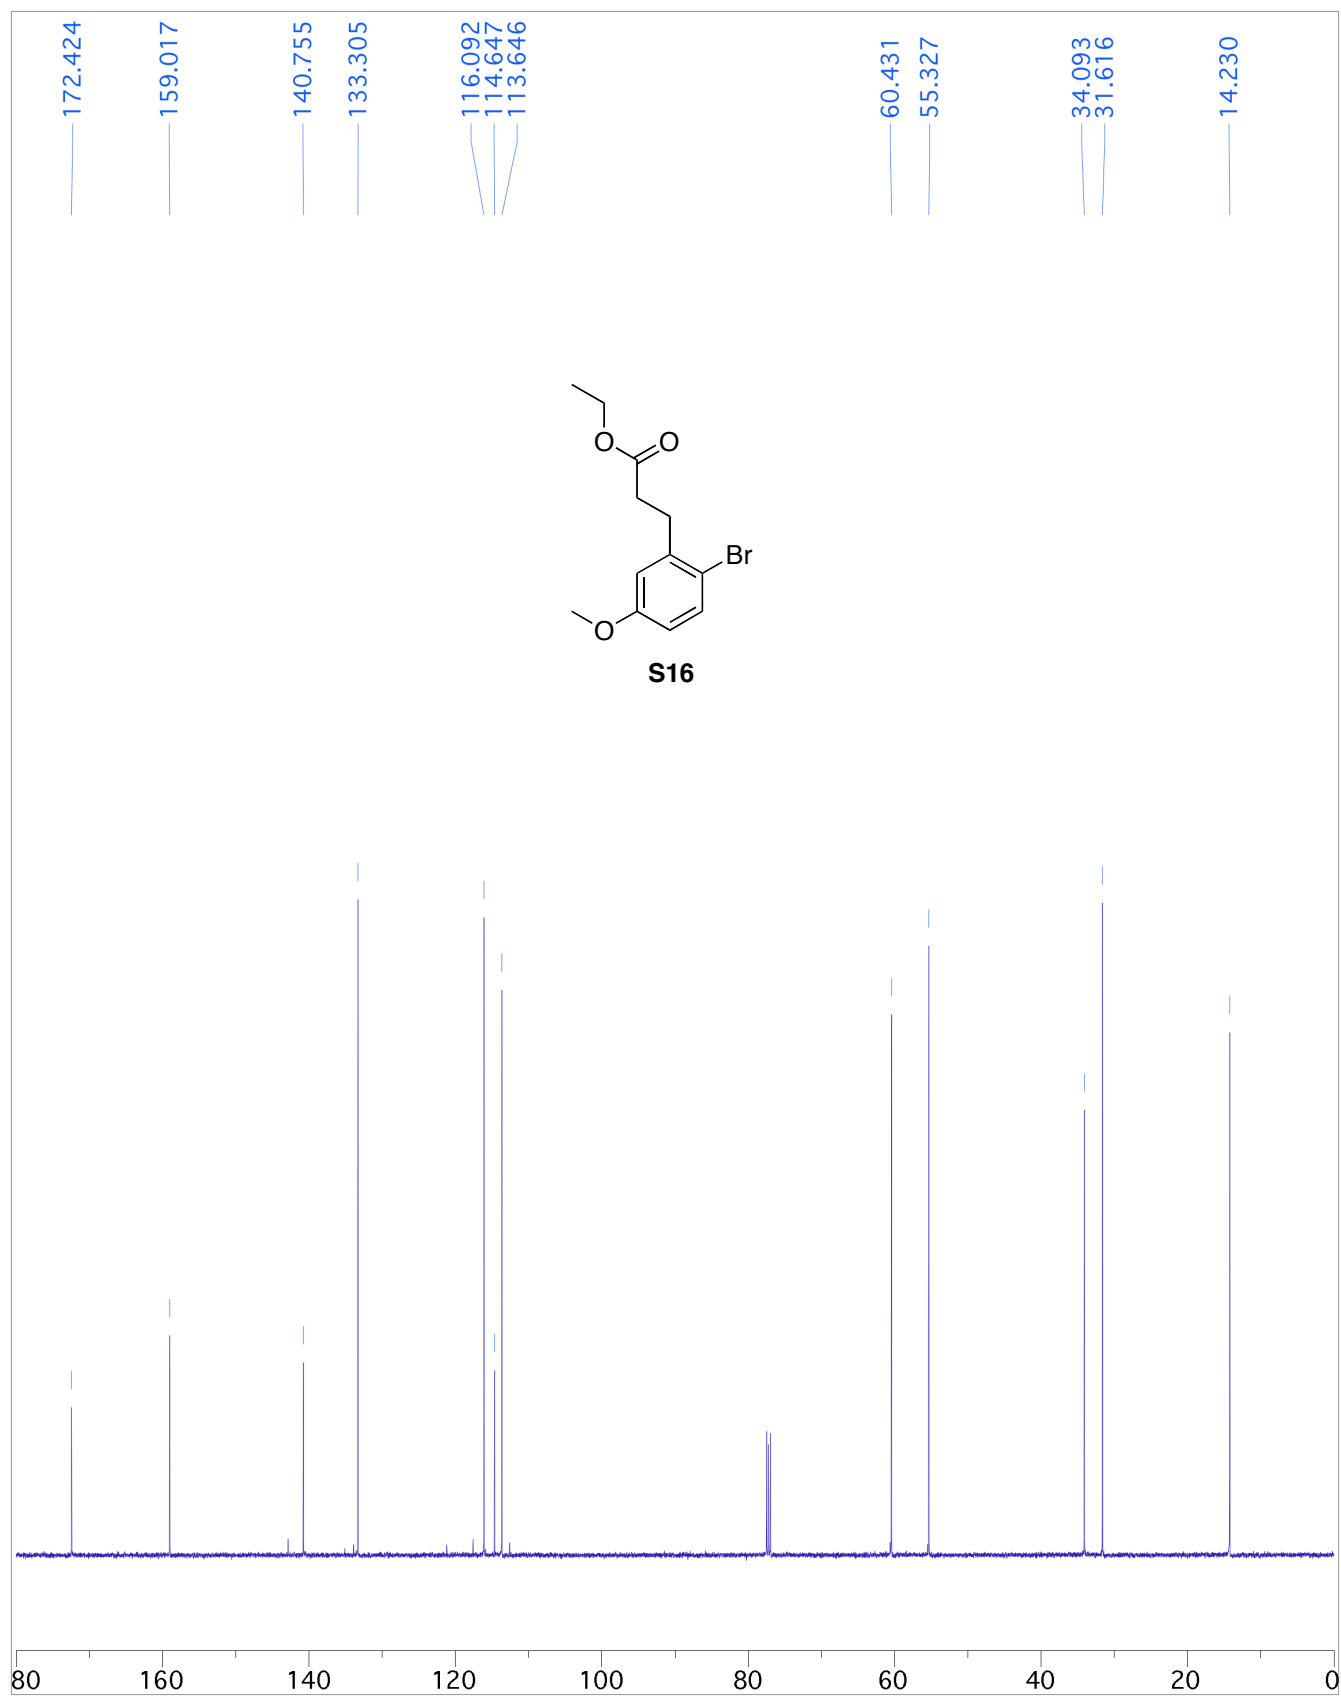

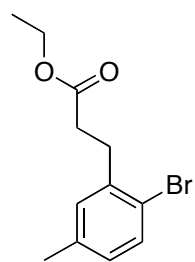**S17**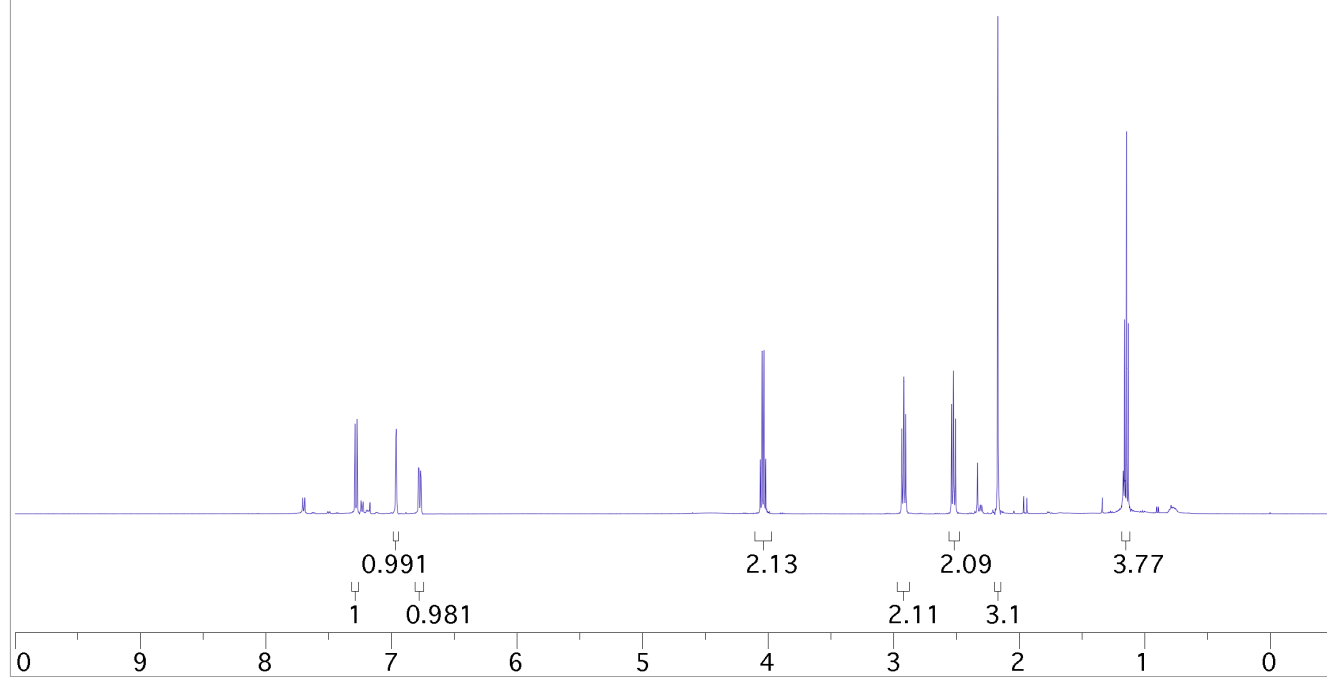

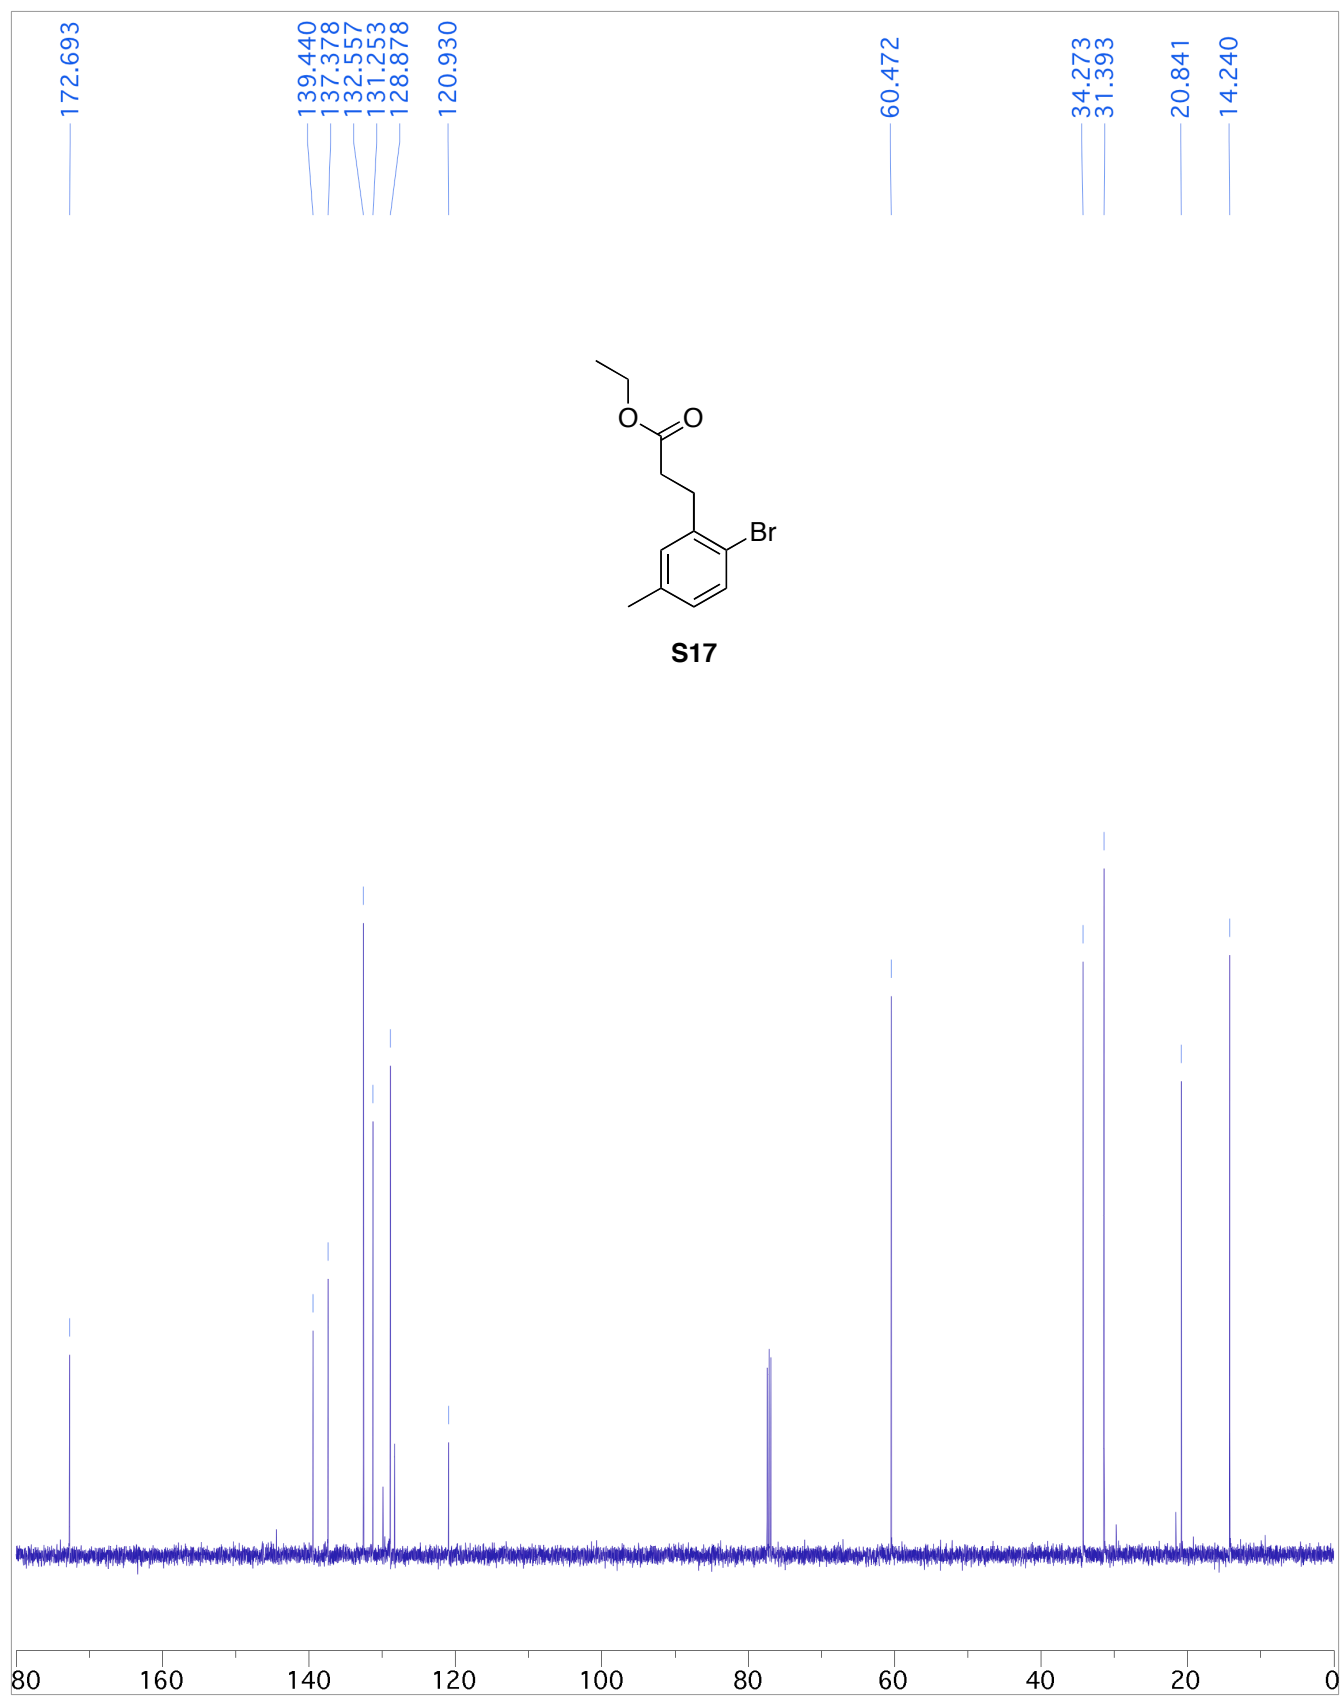

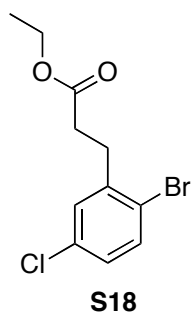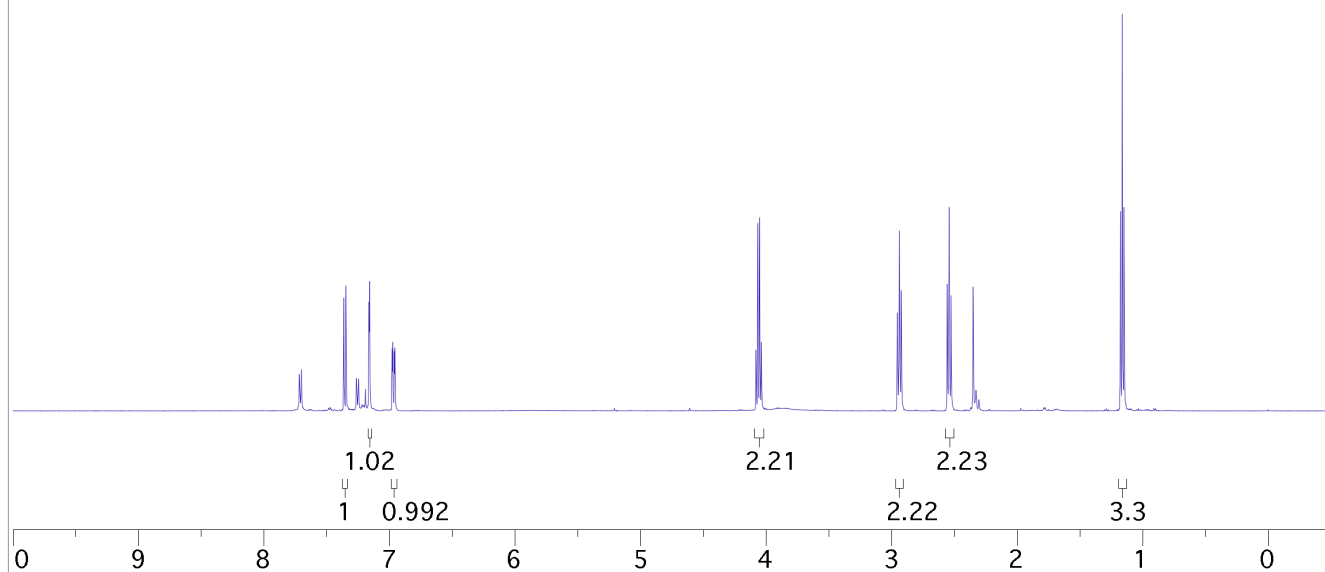



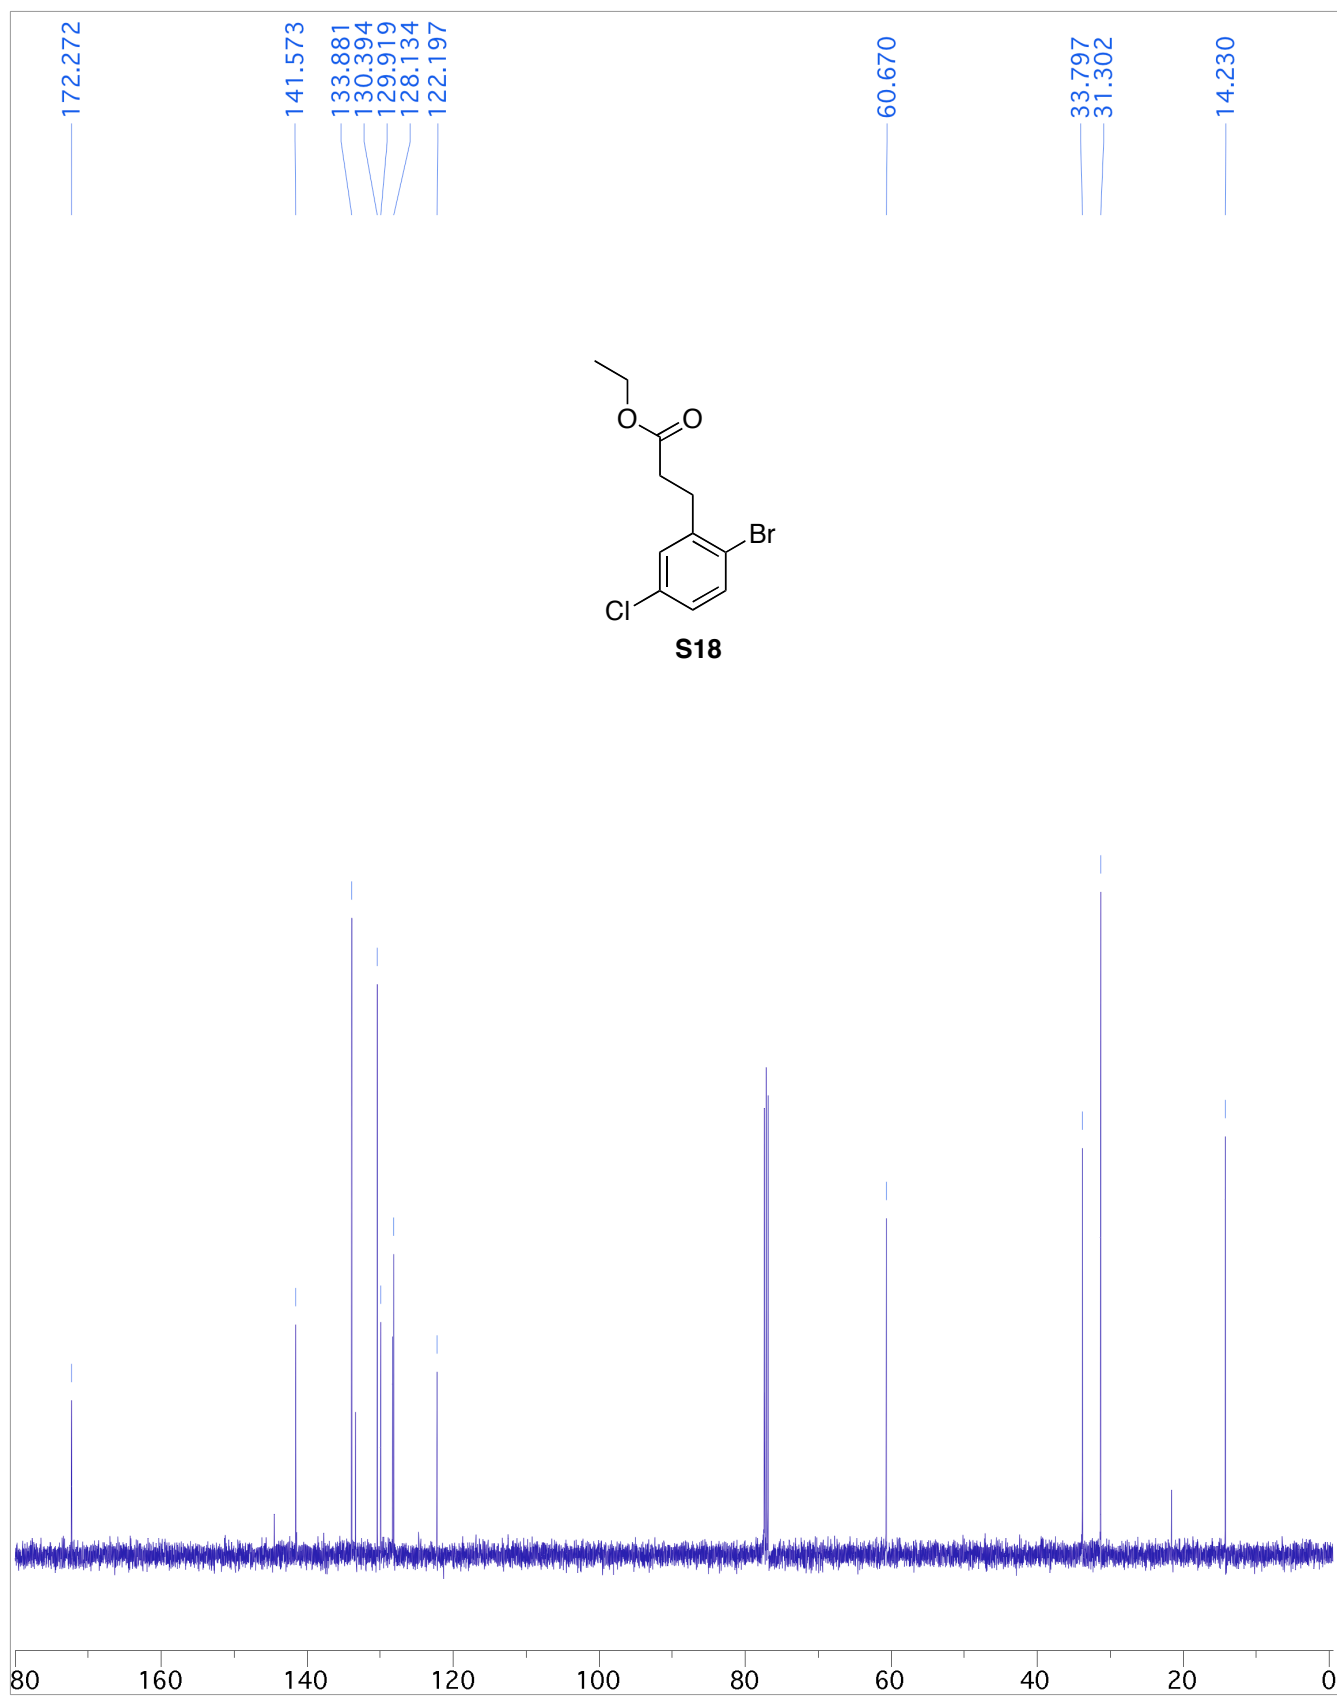

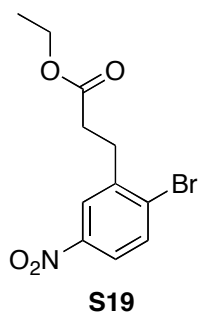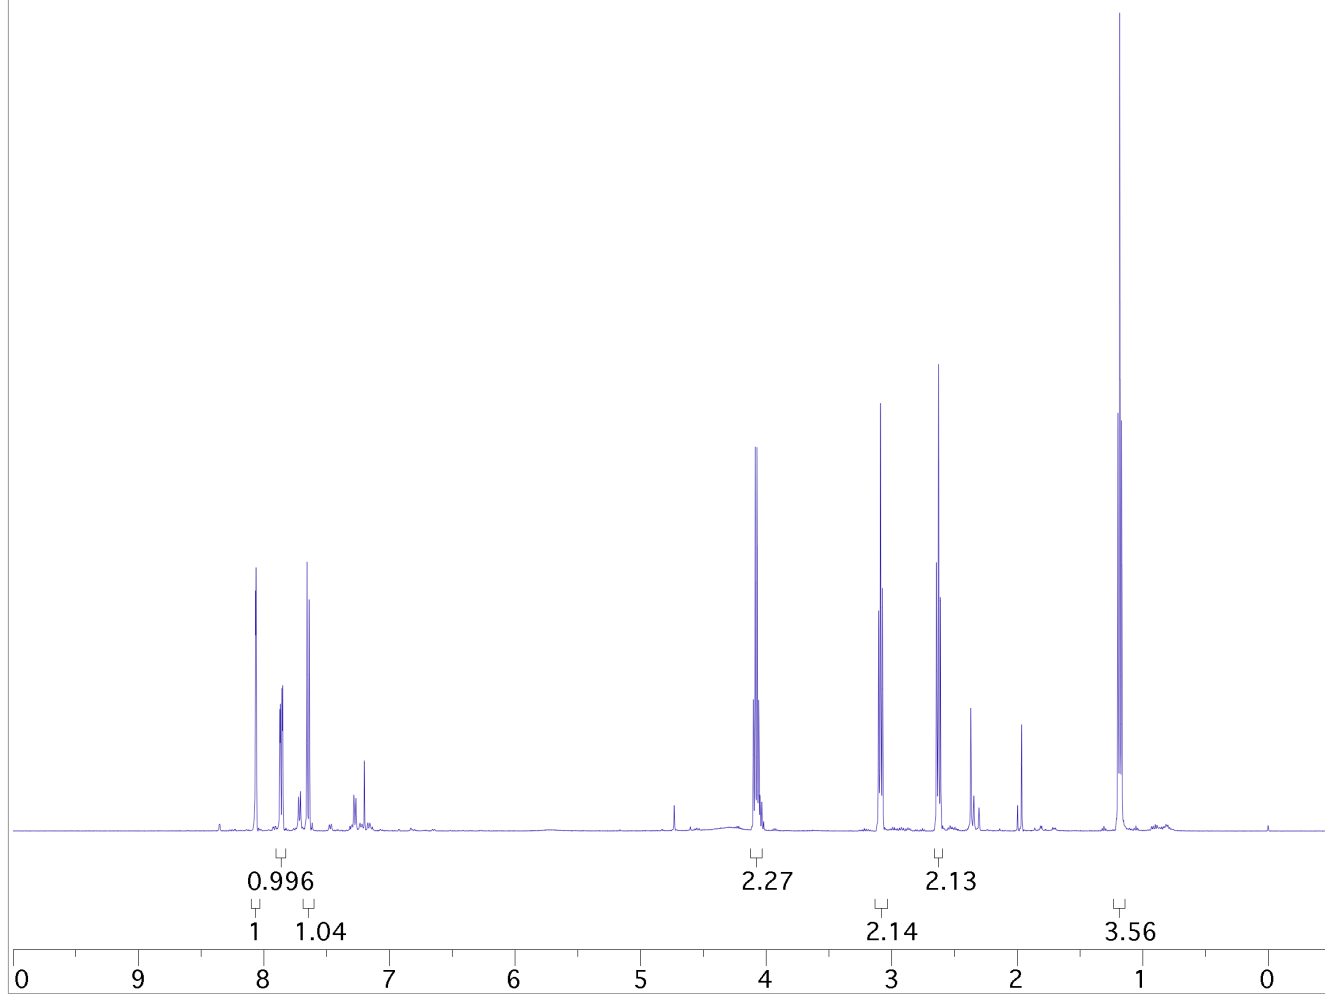

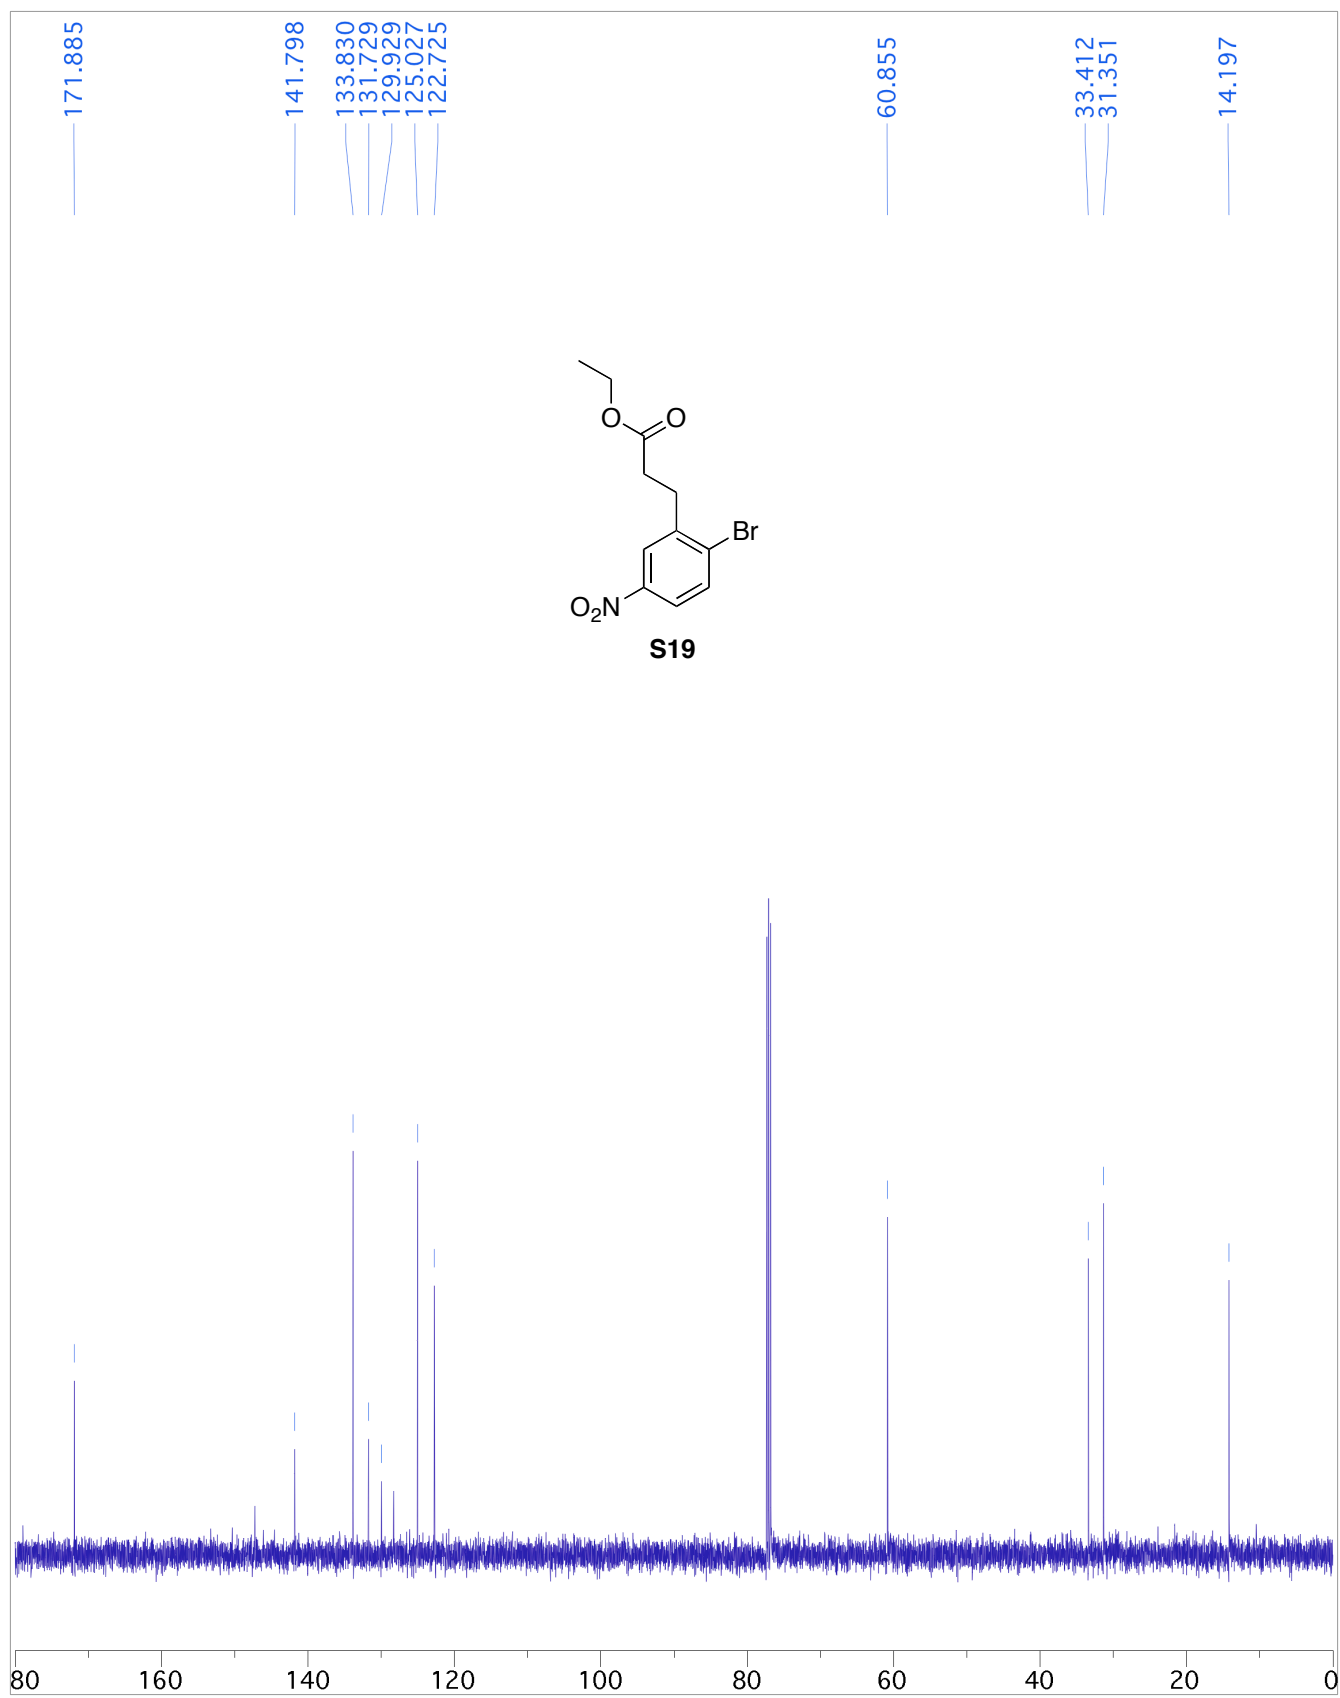

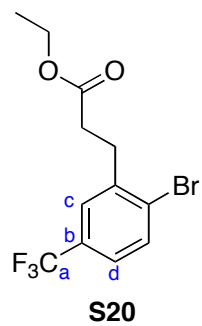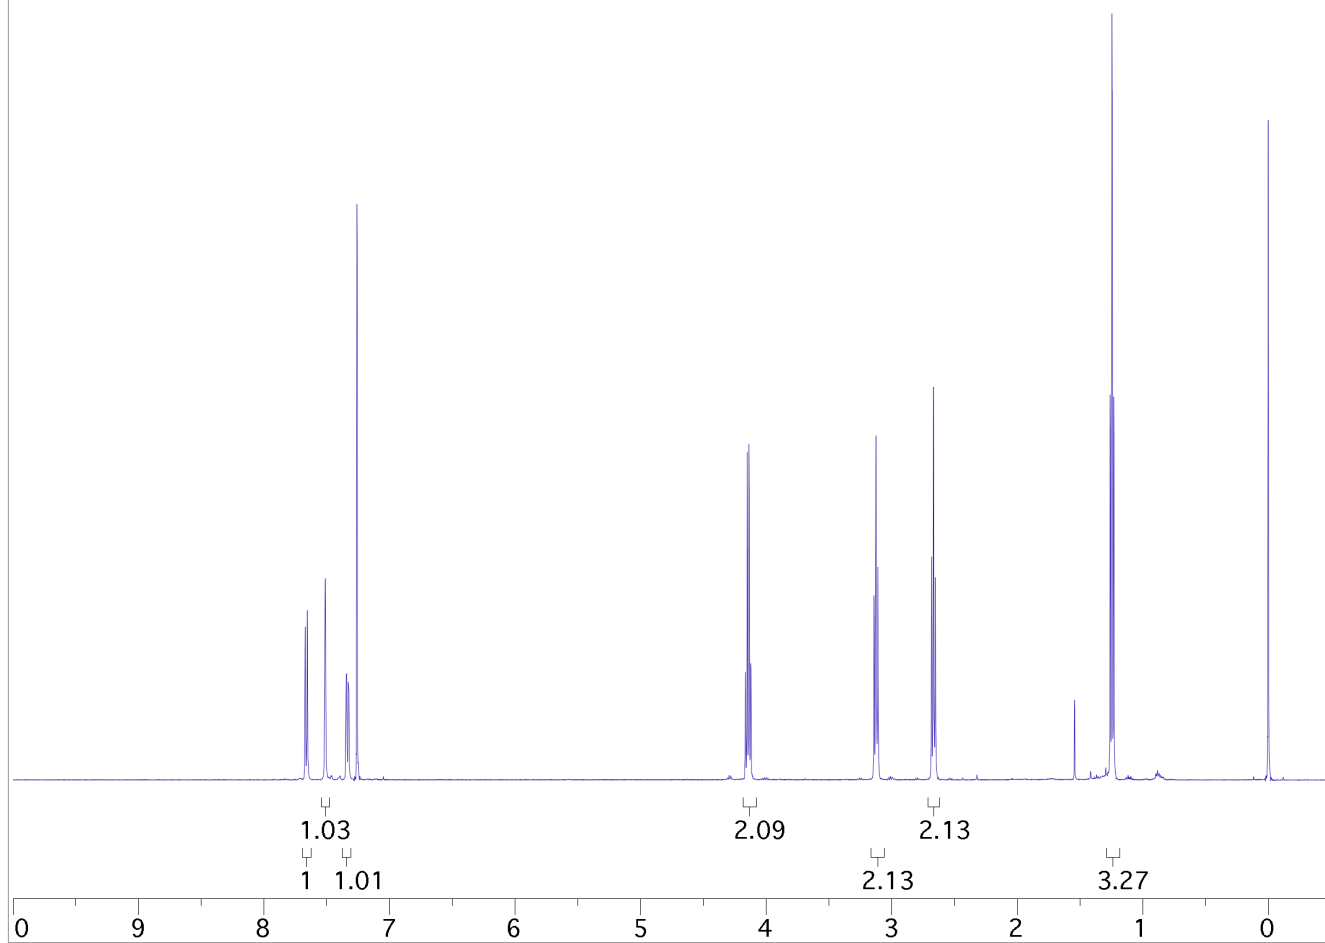

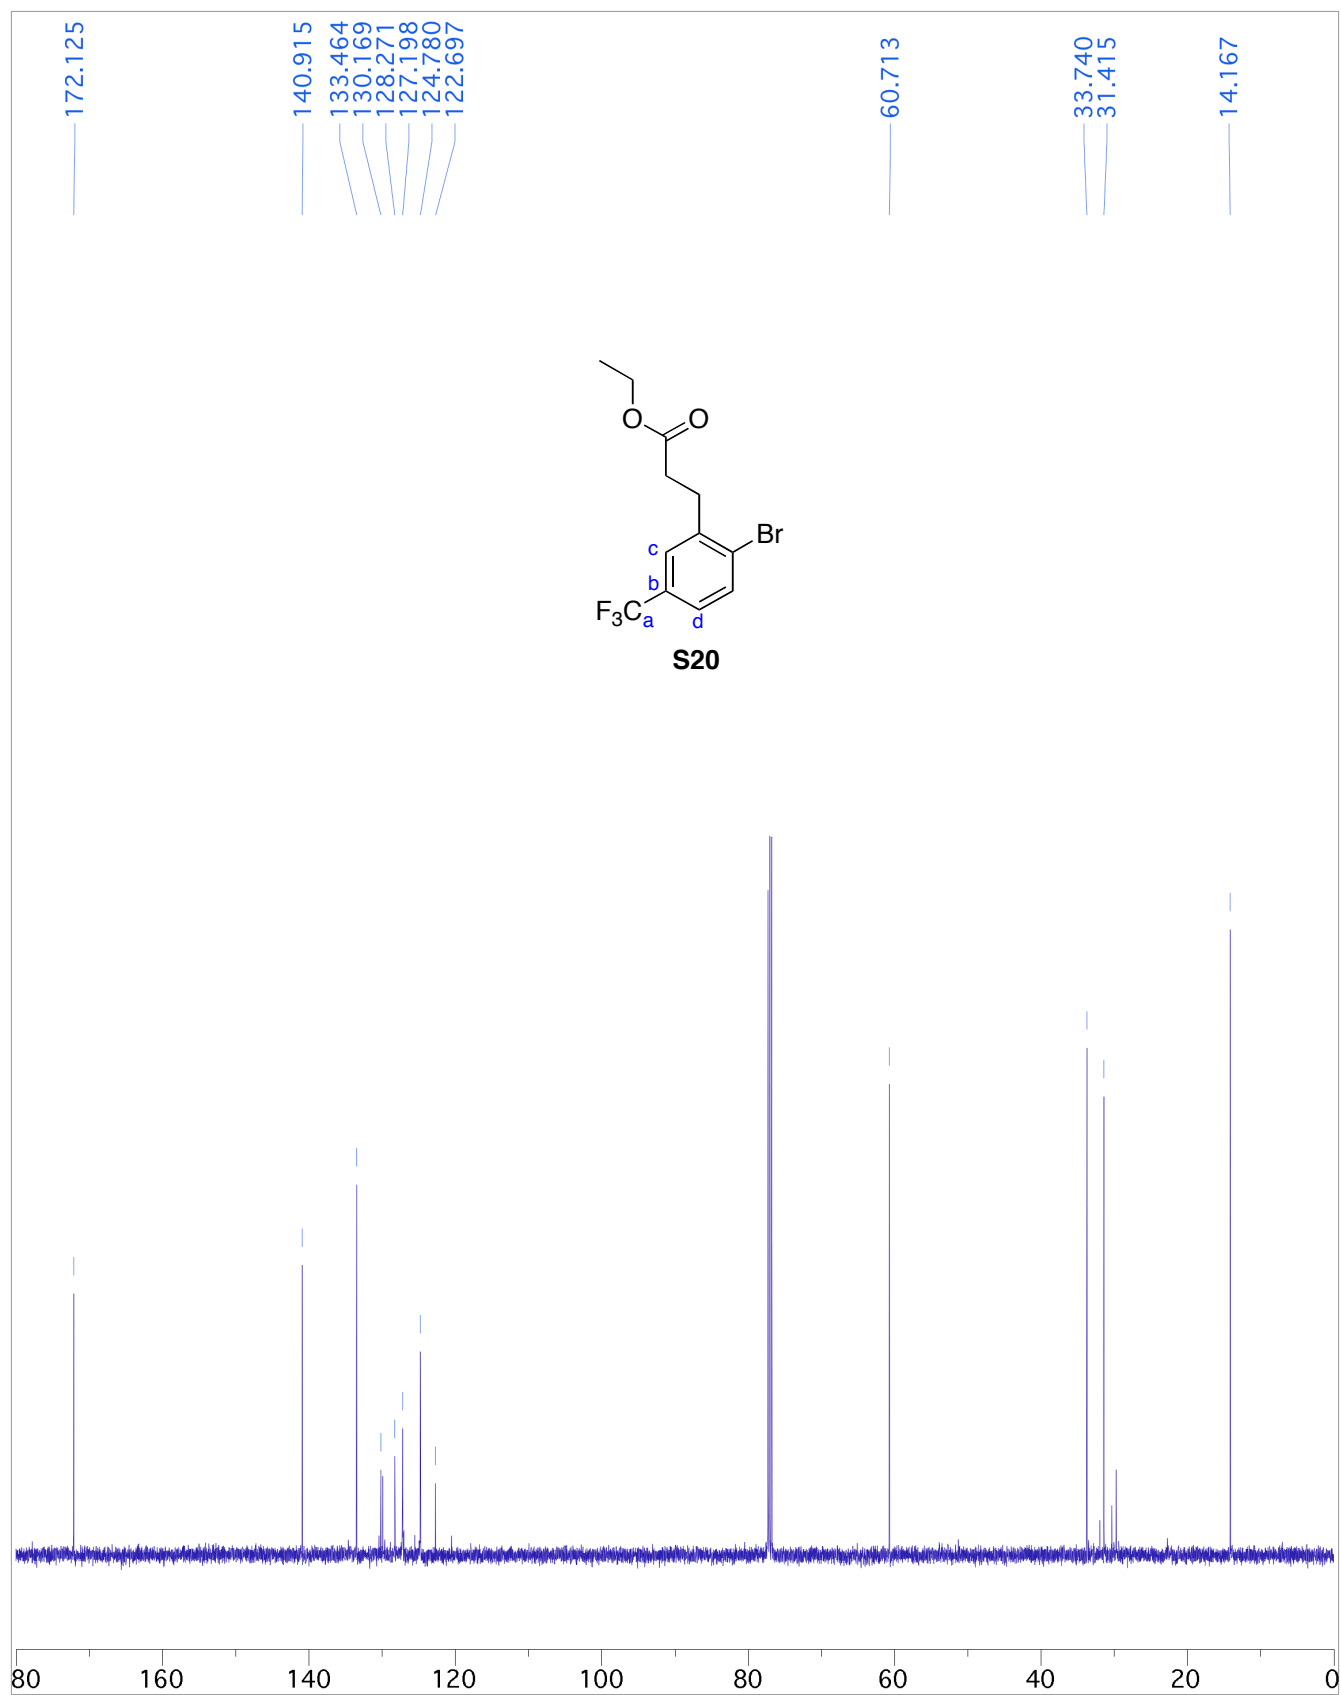

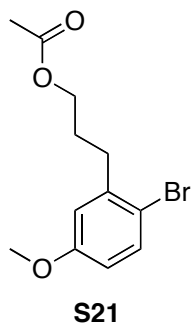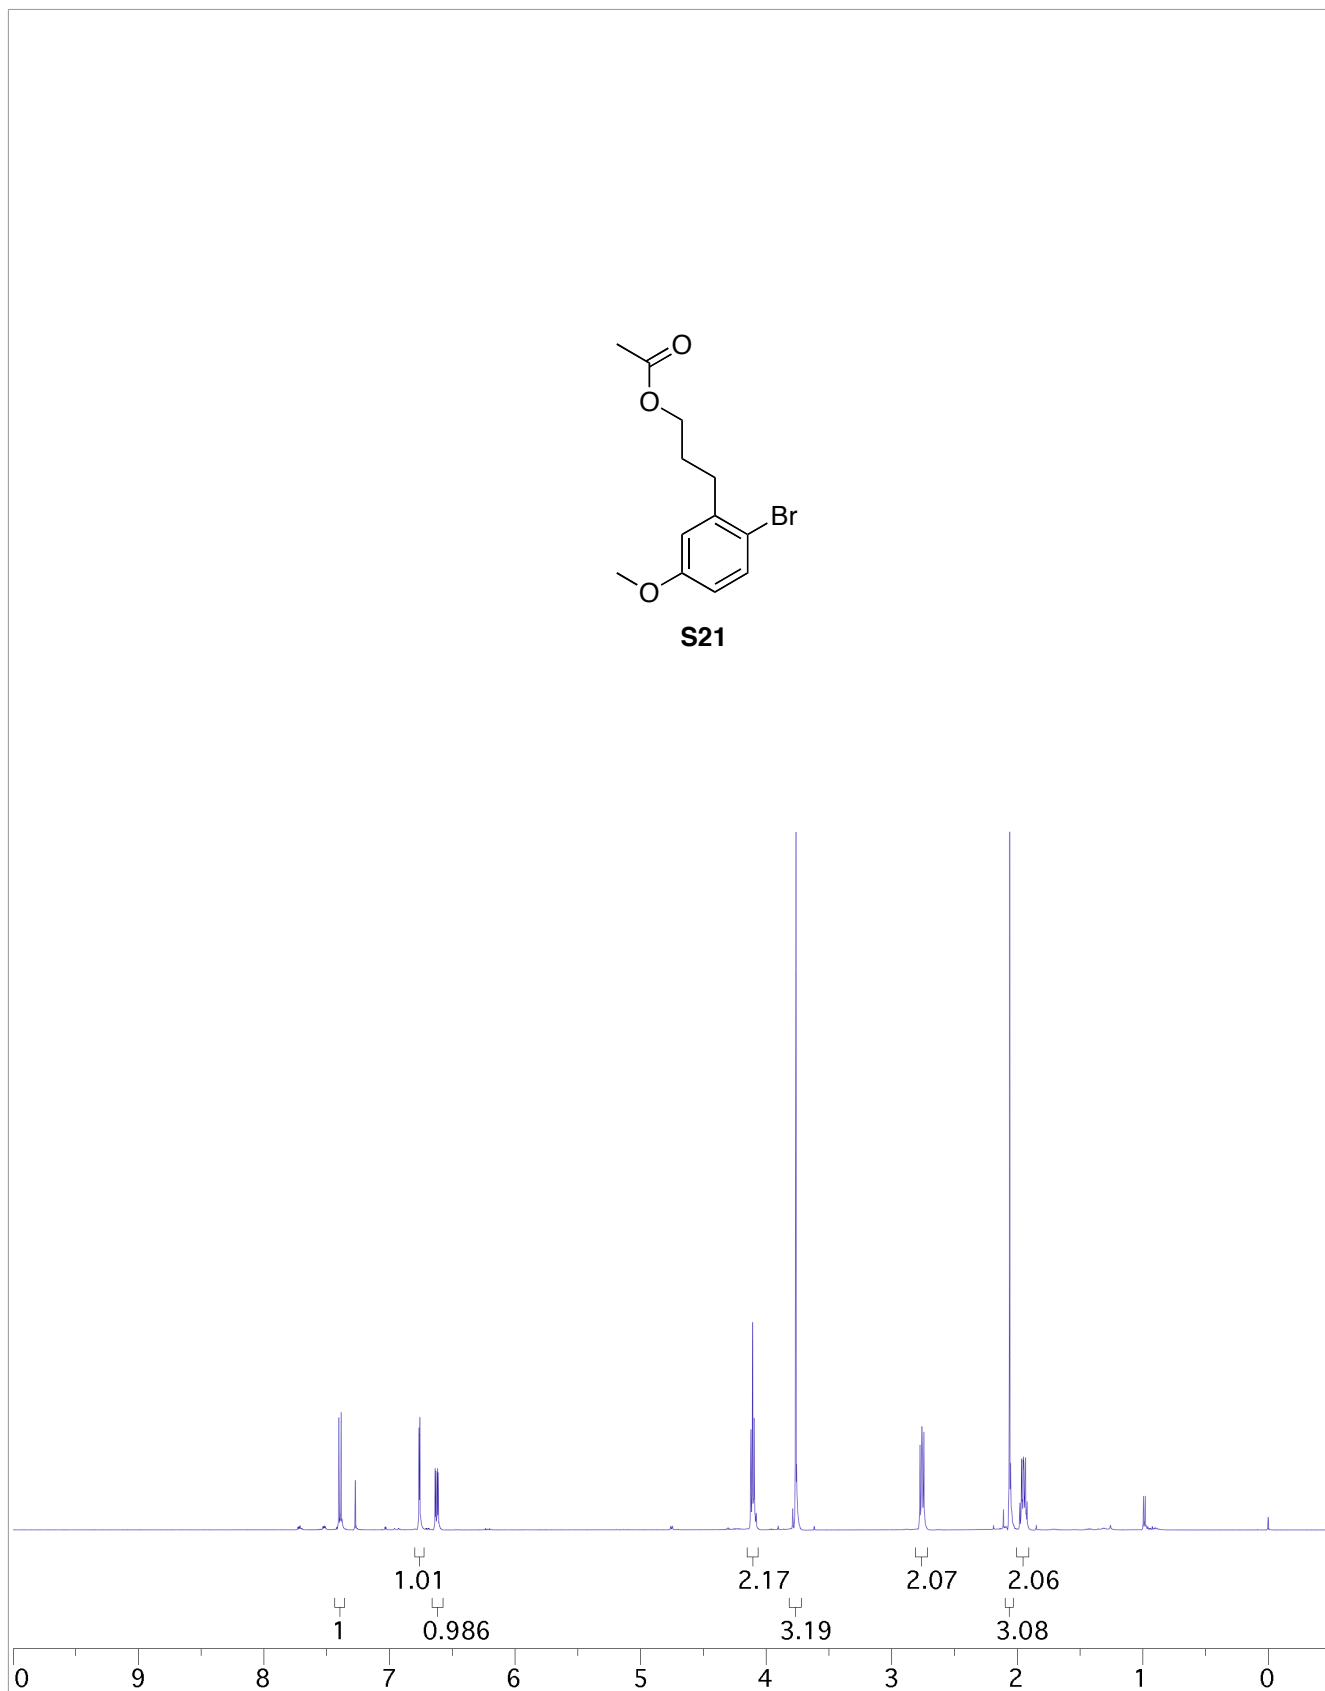

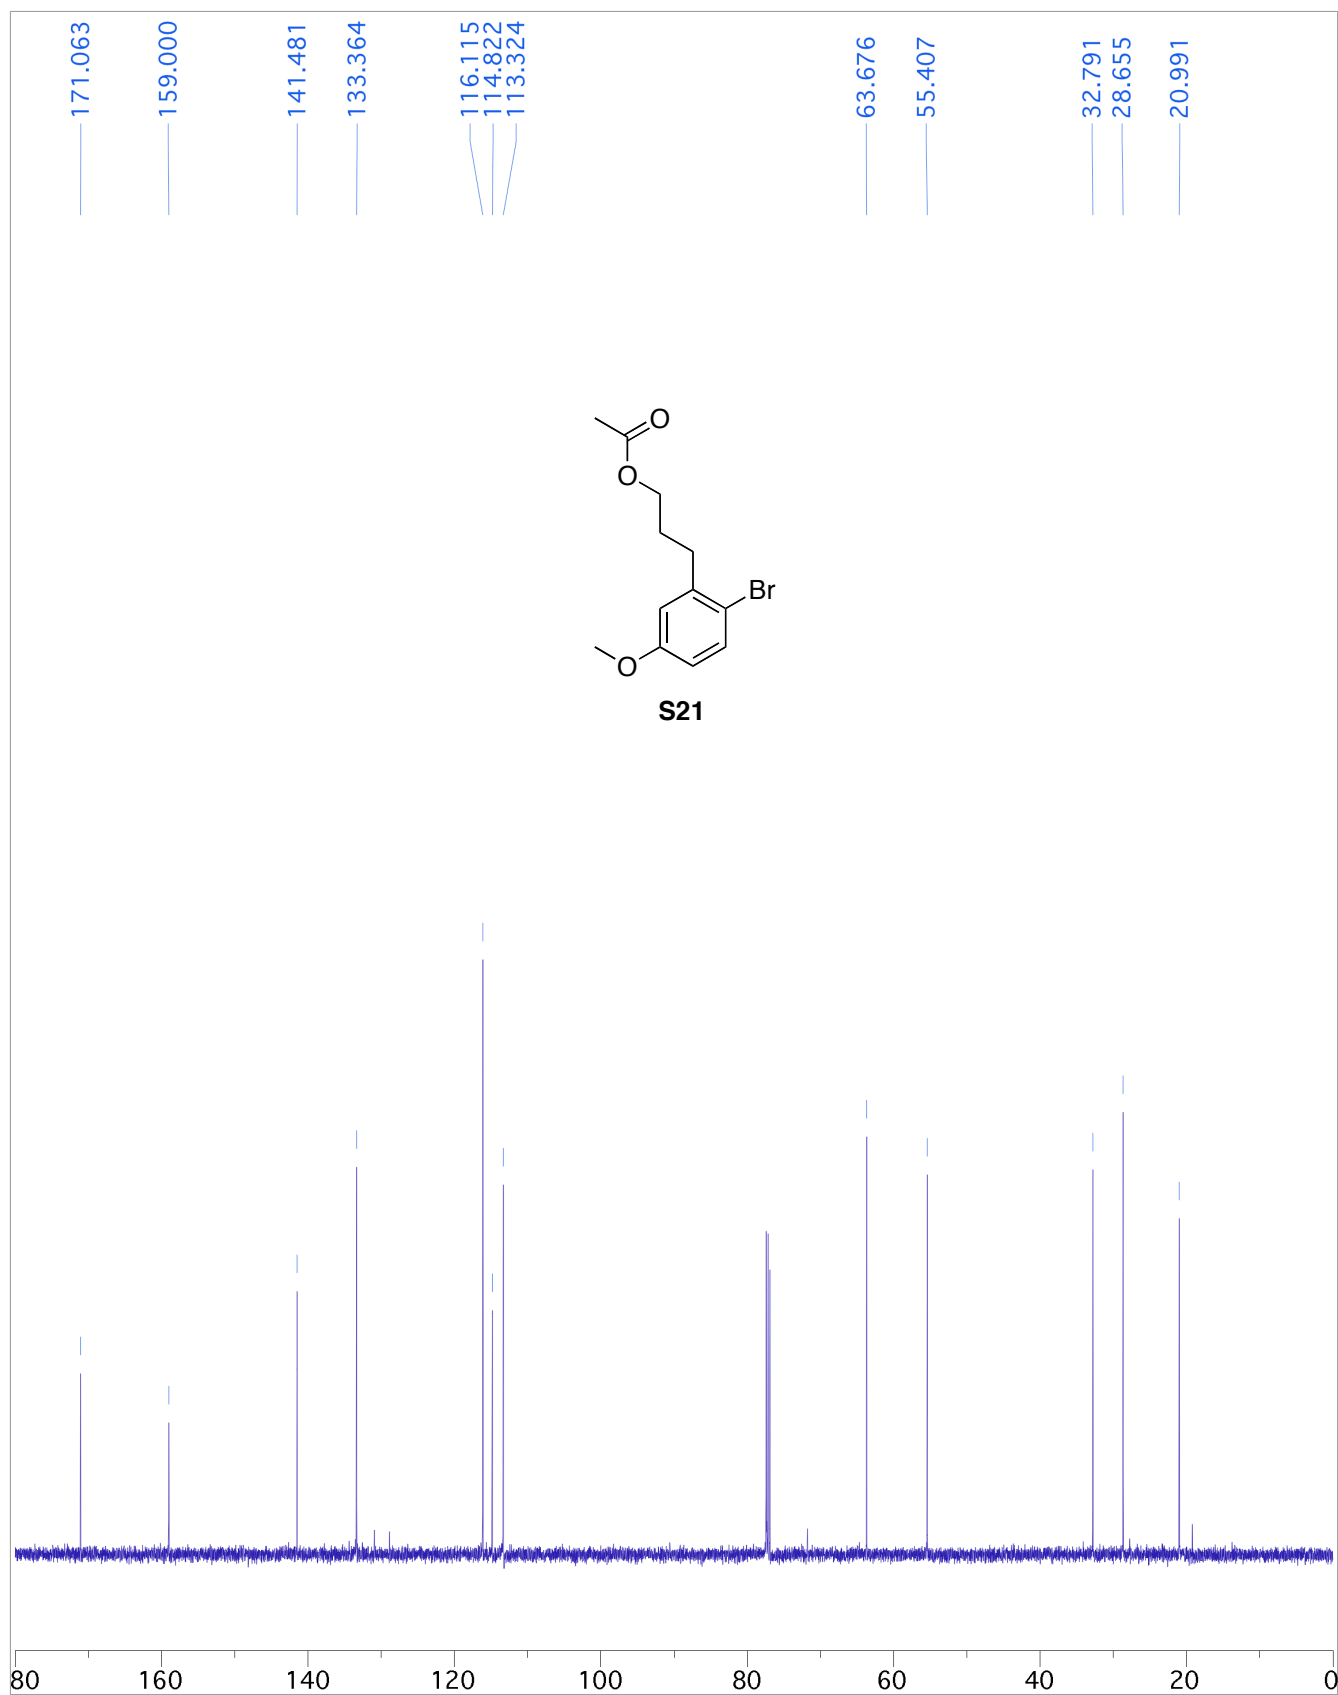

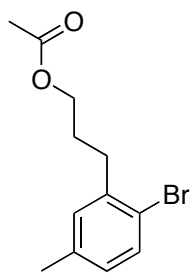

S22

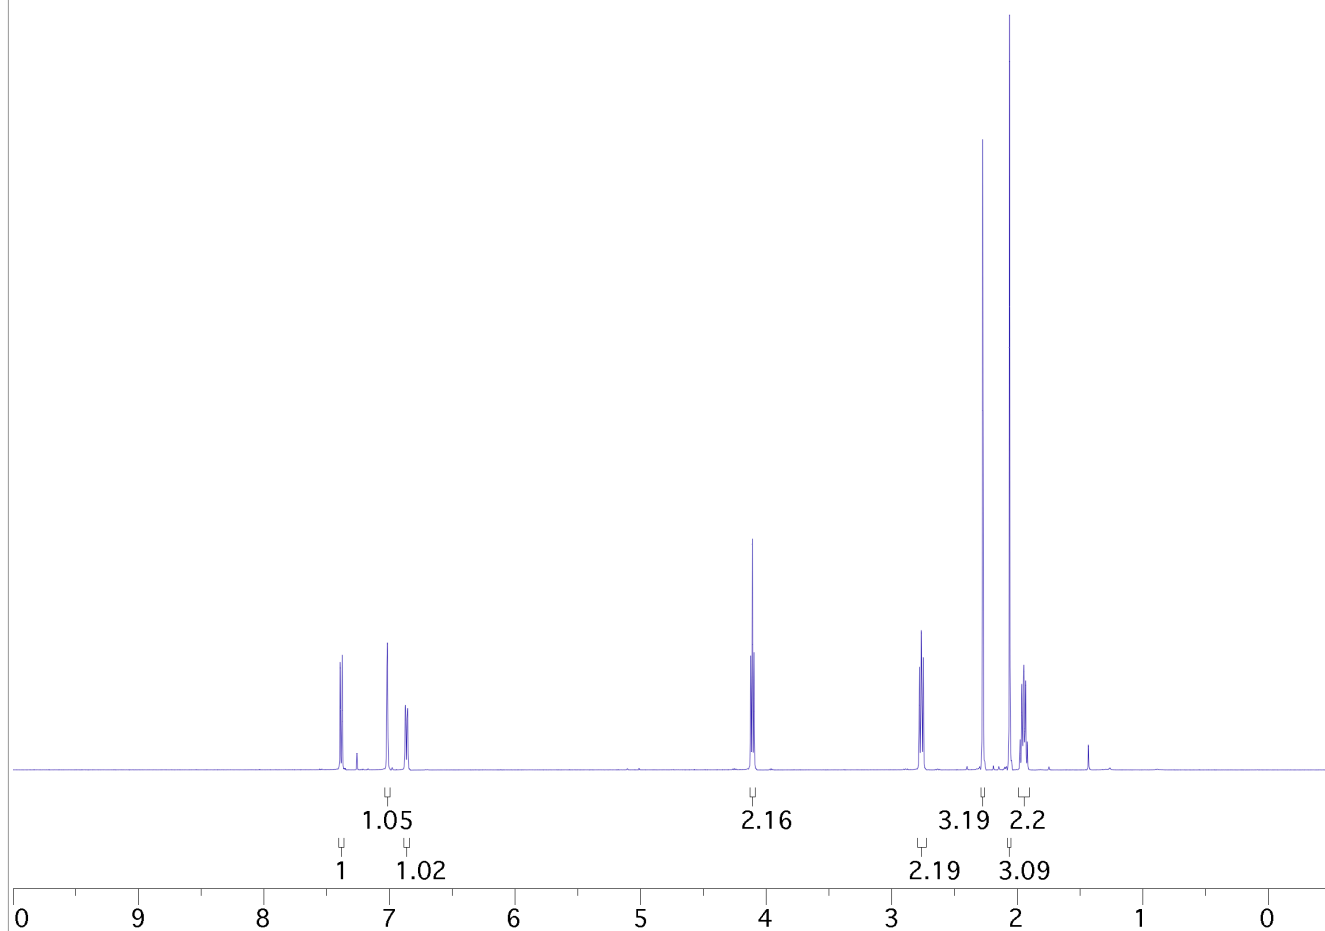



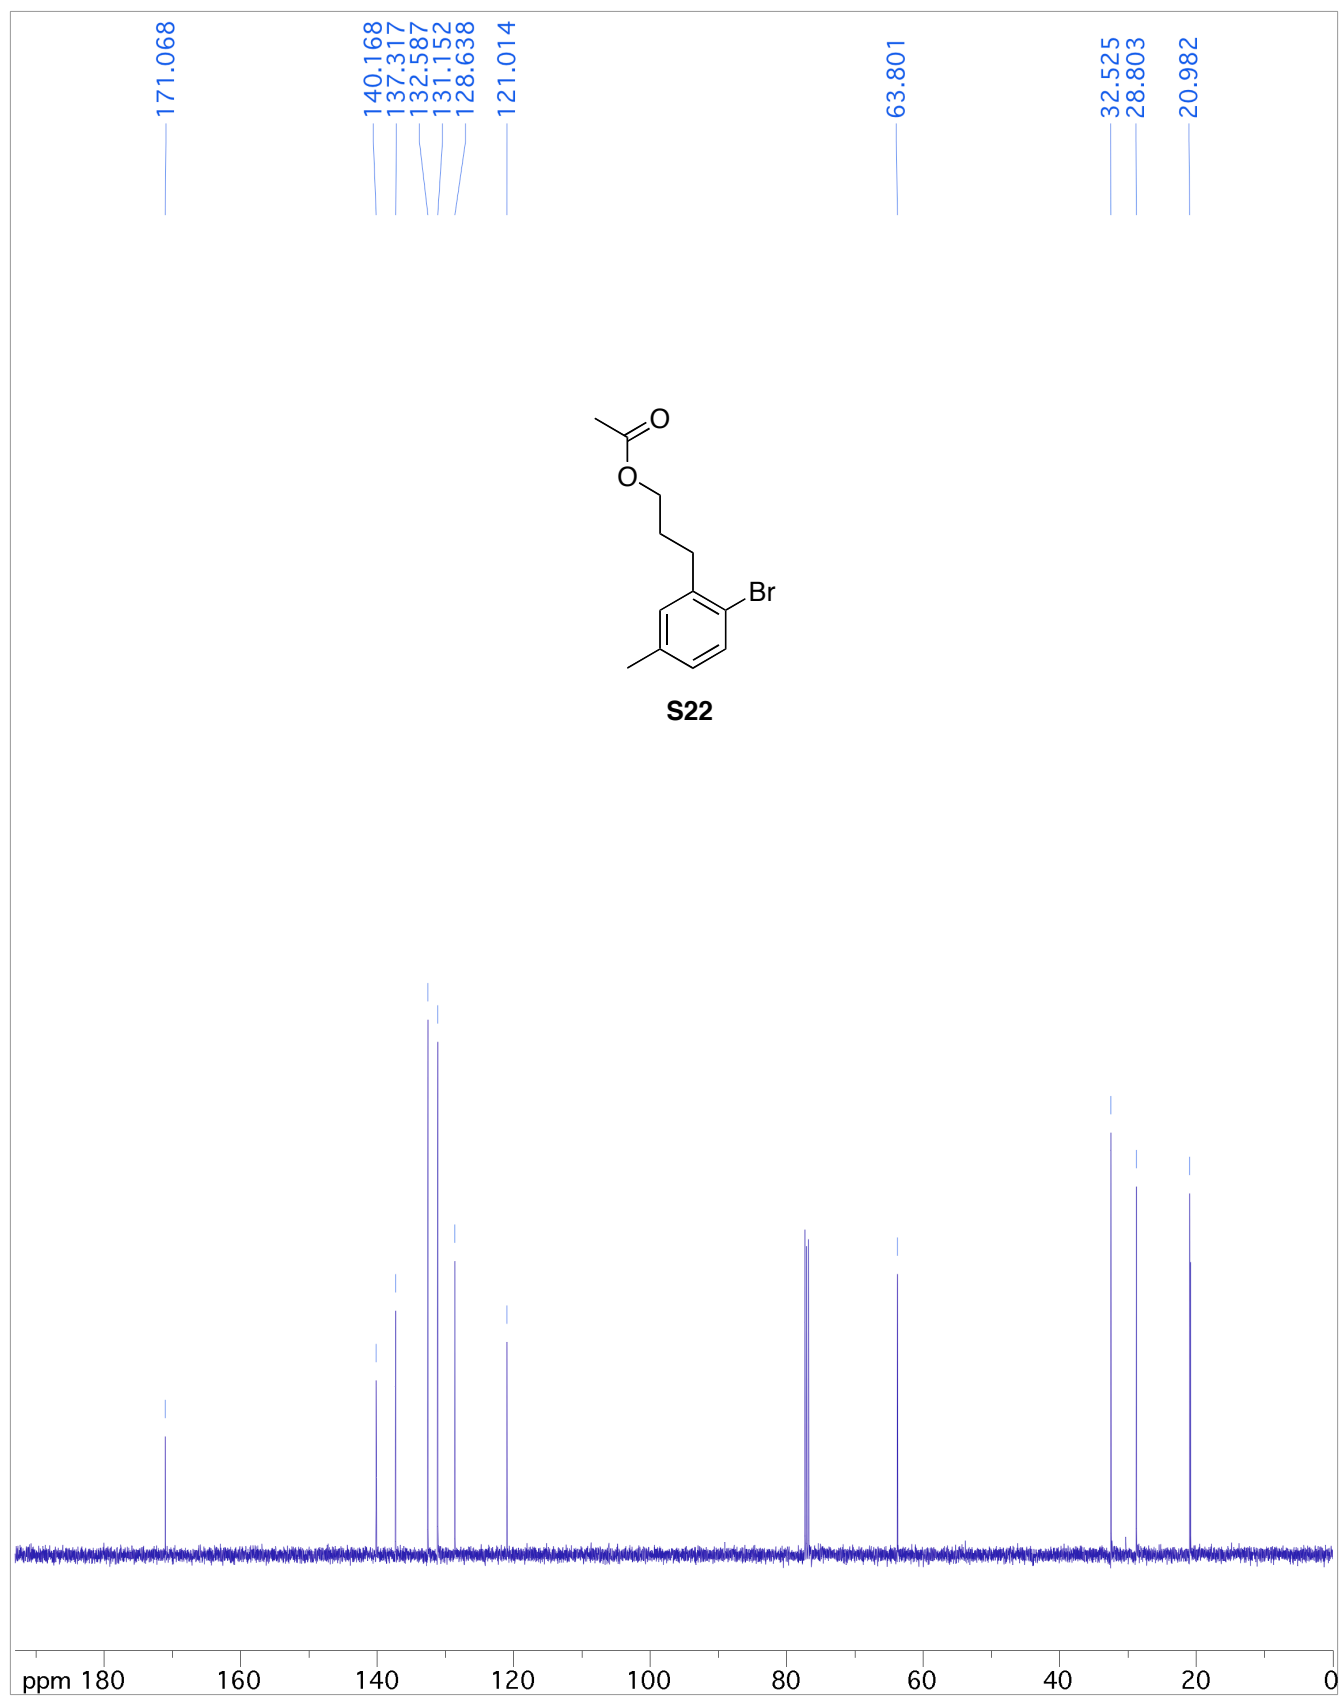

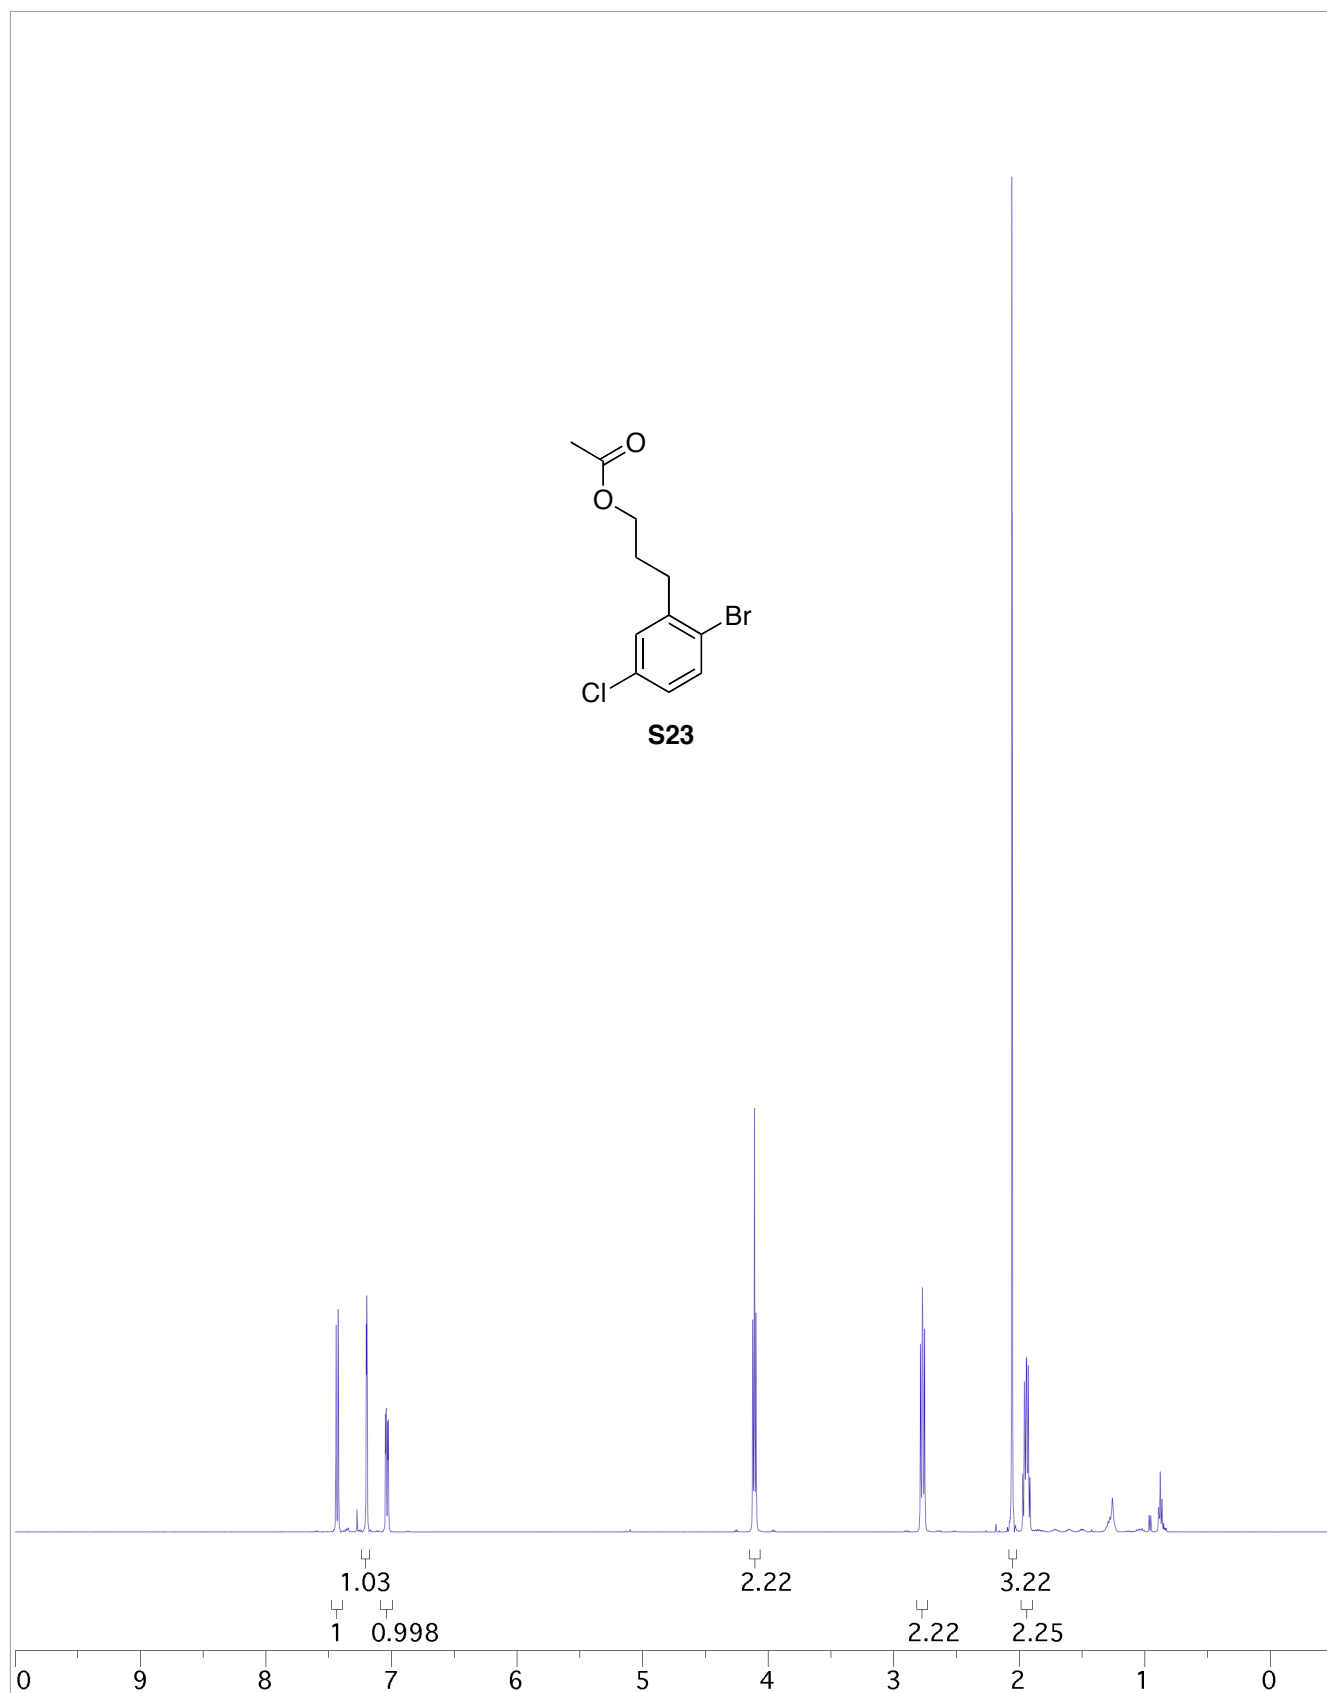

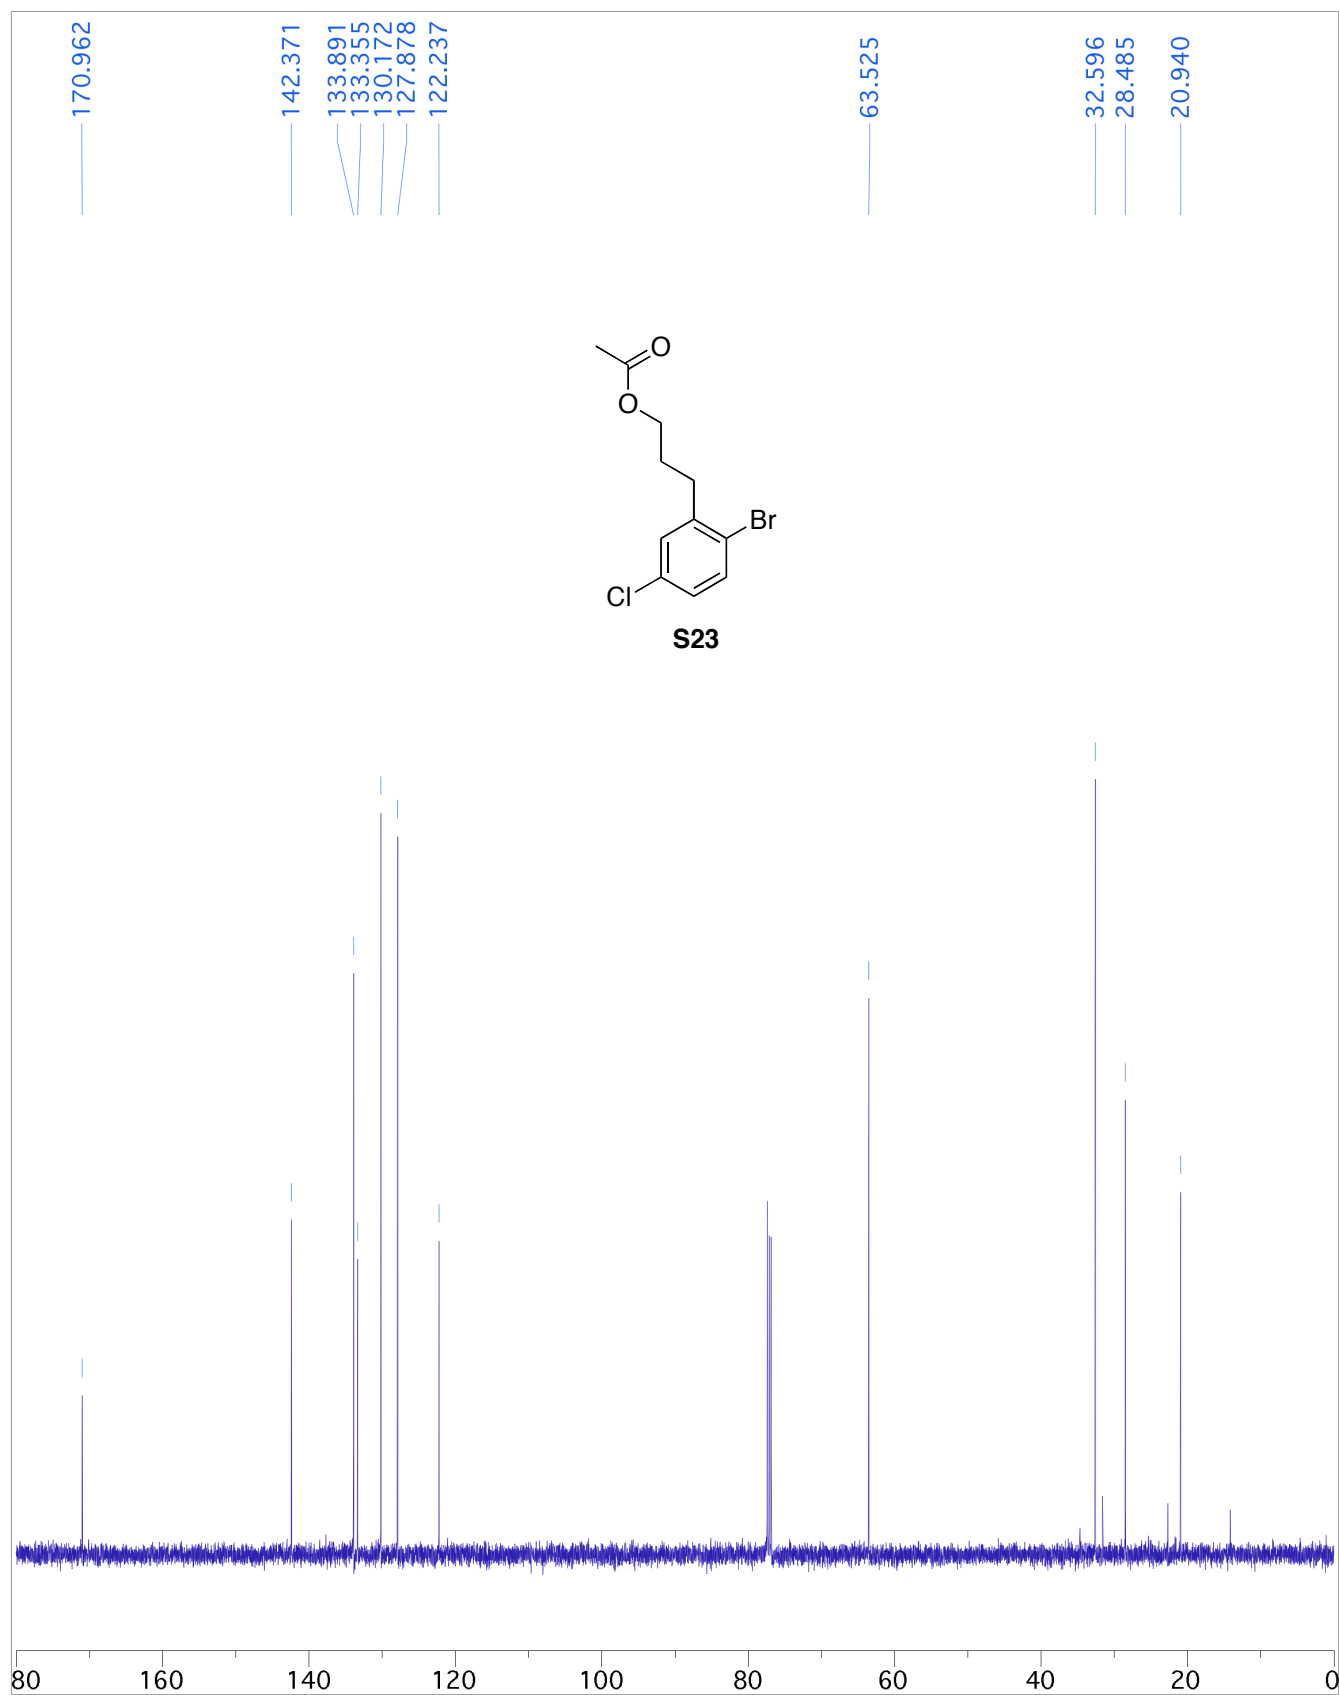

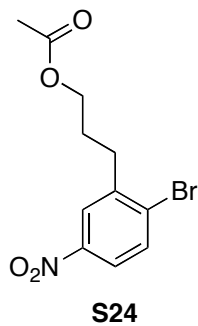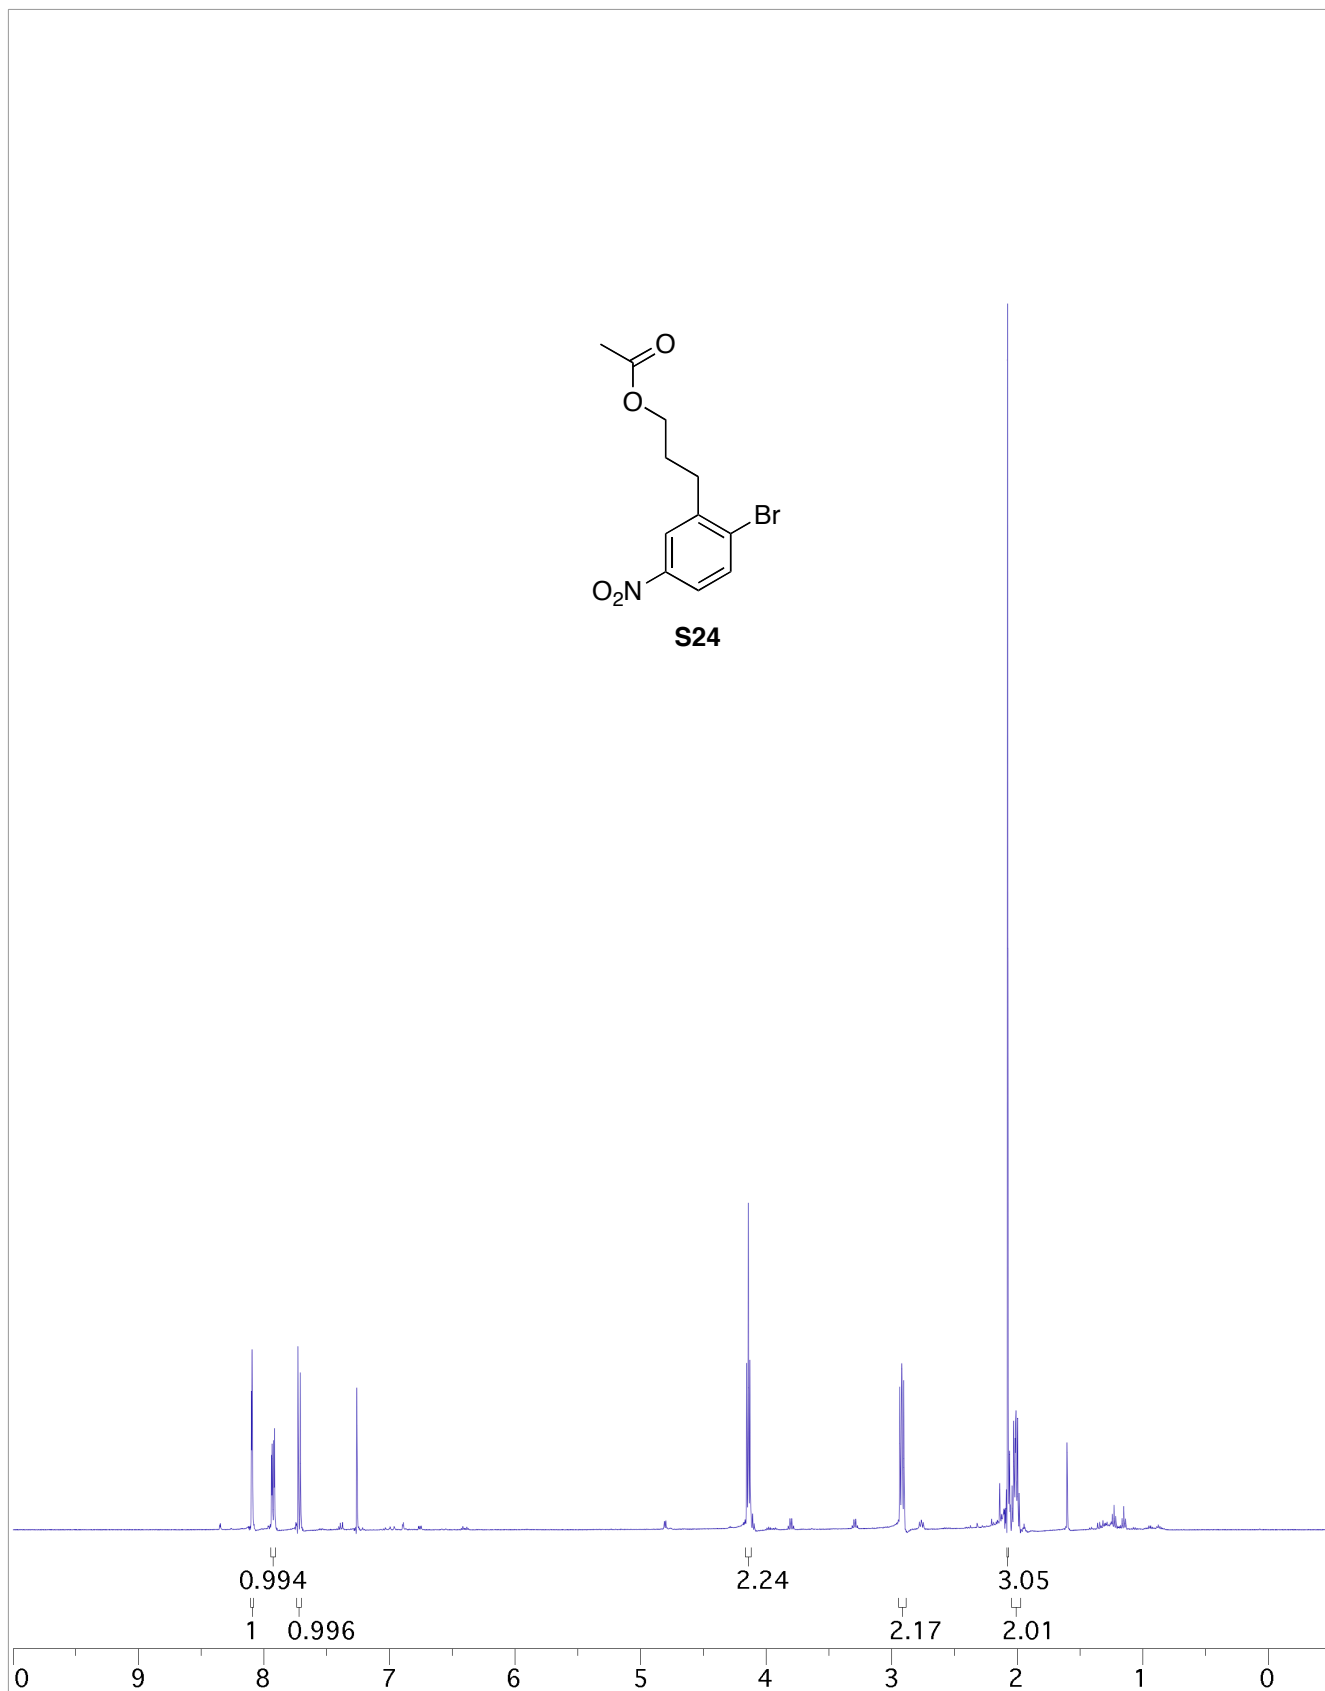

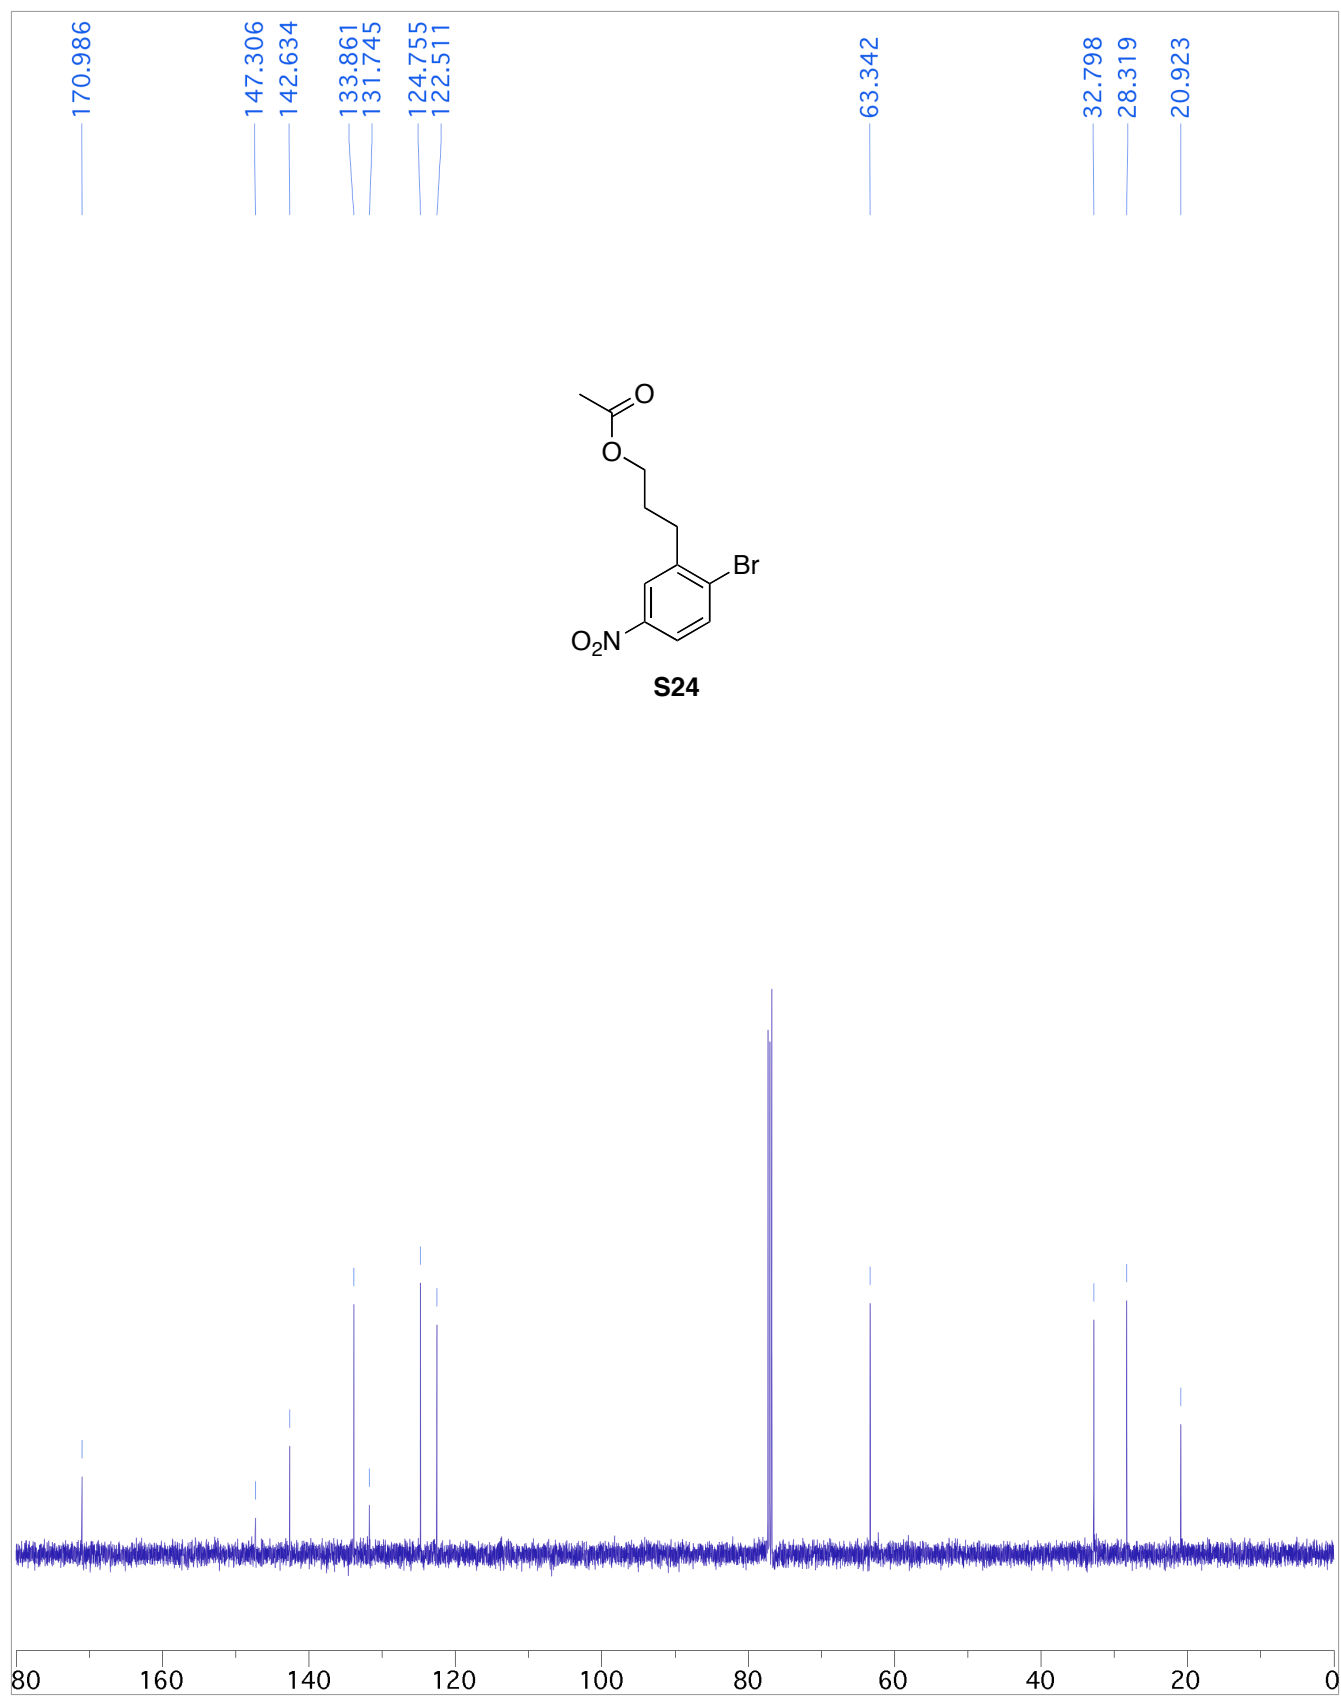

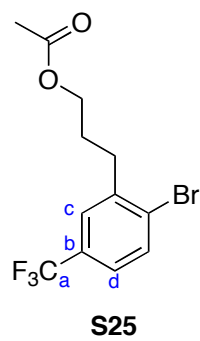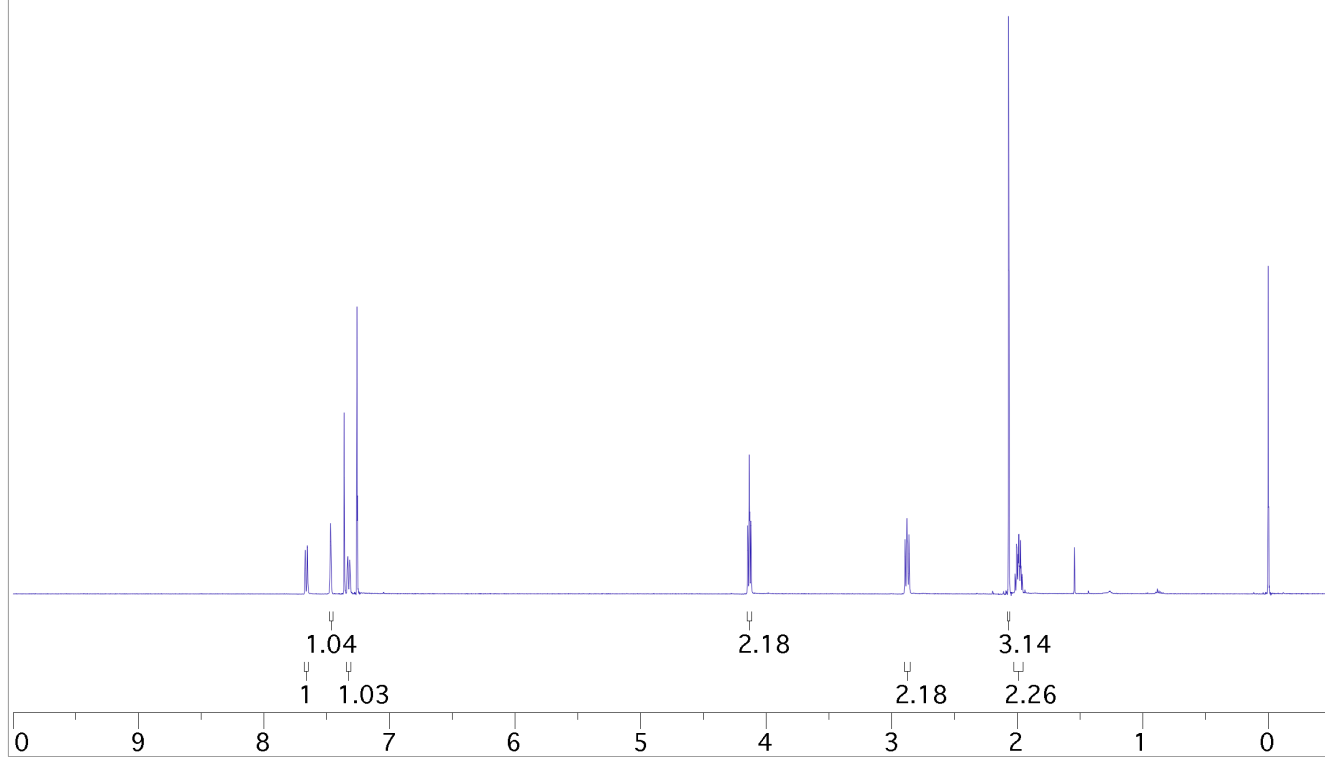

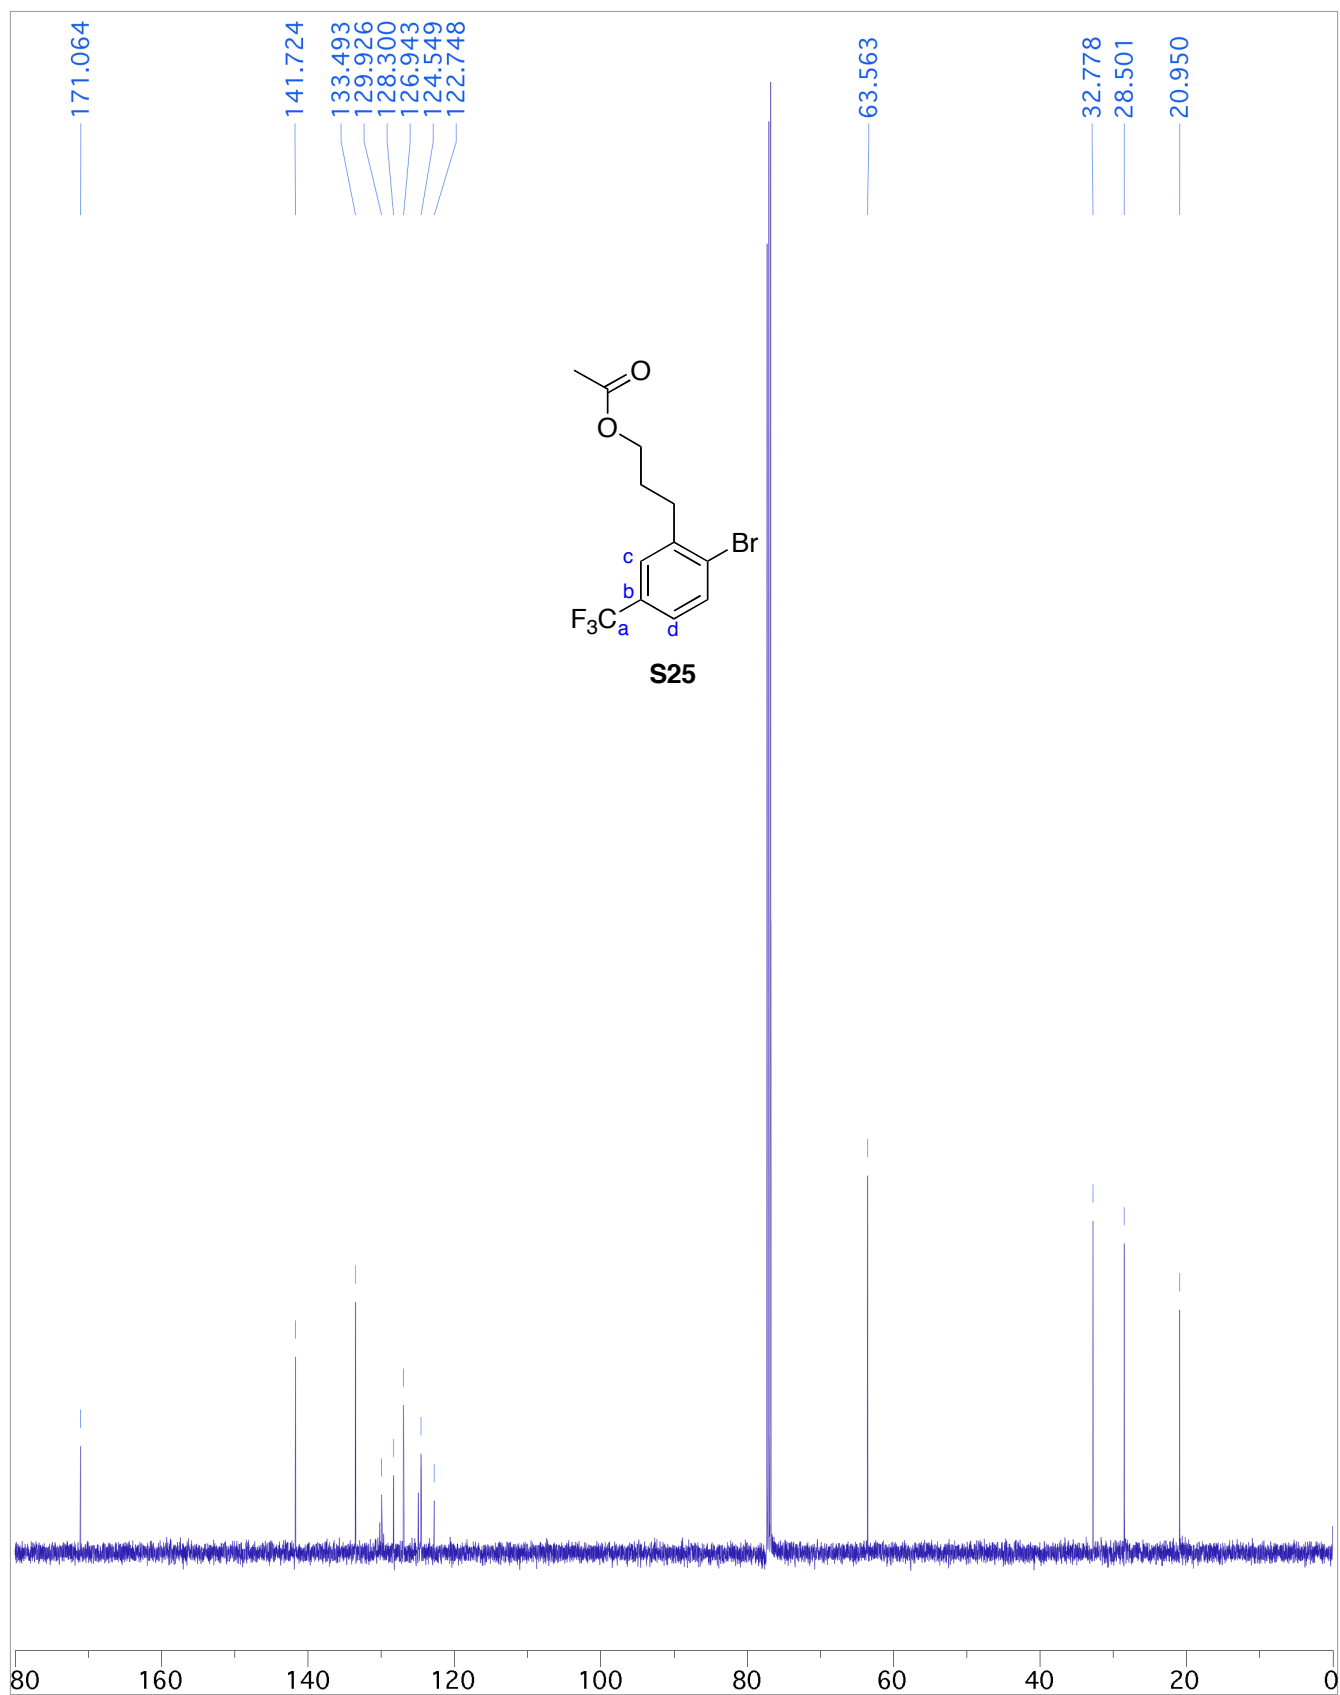





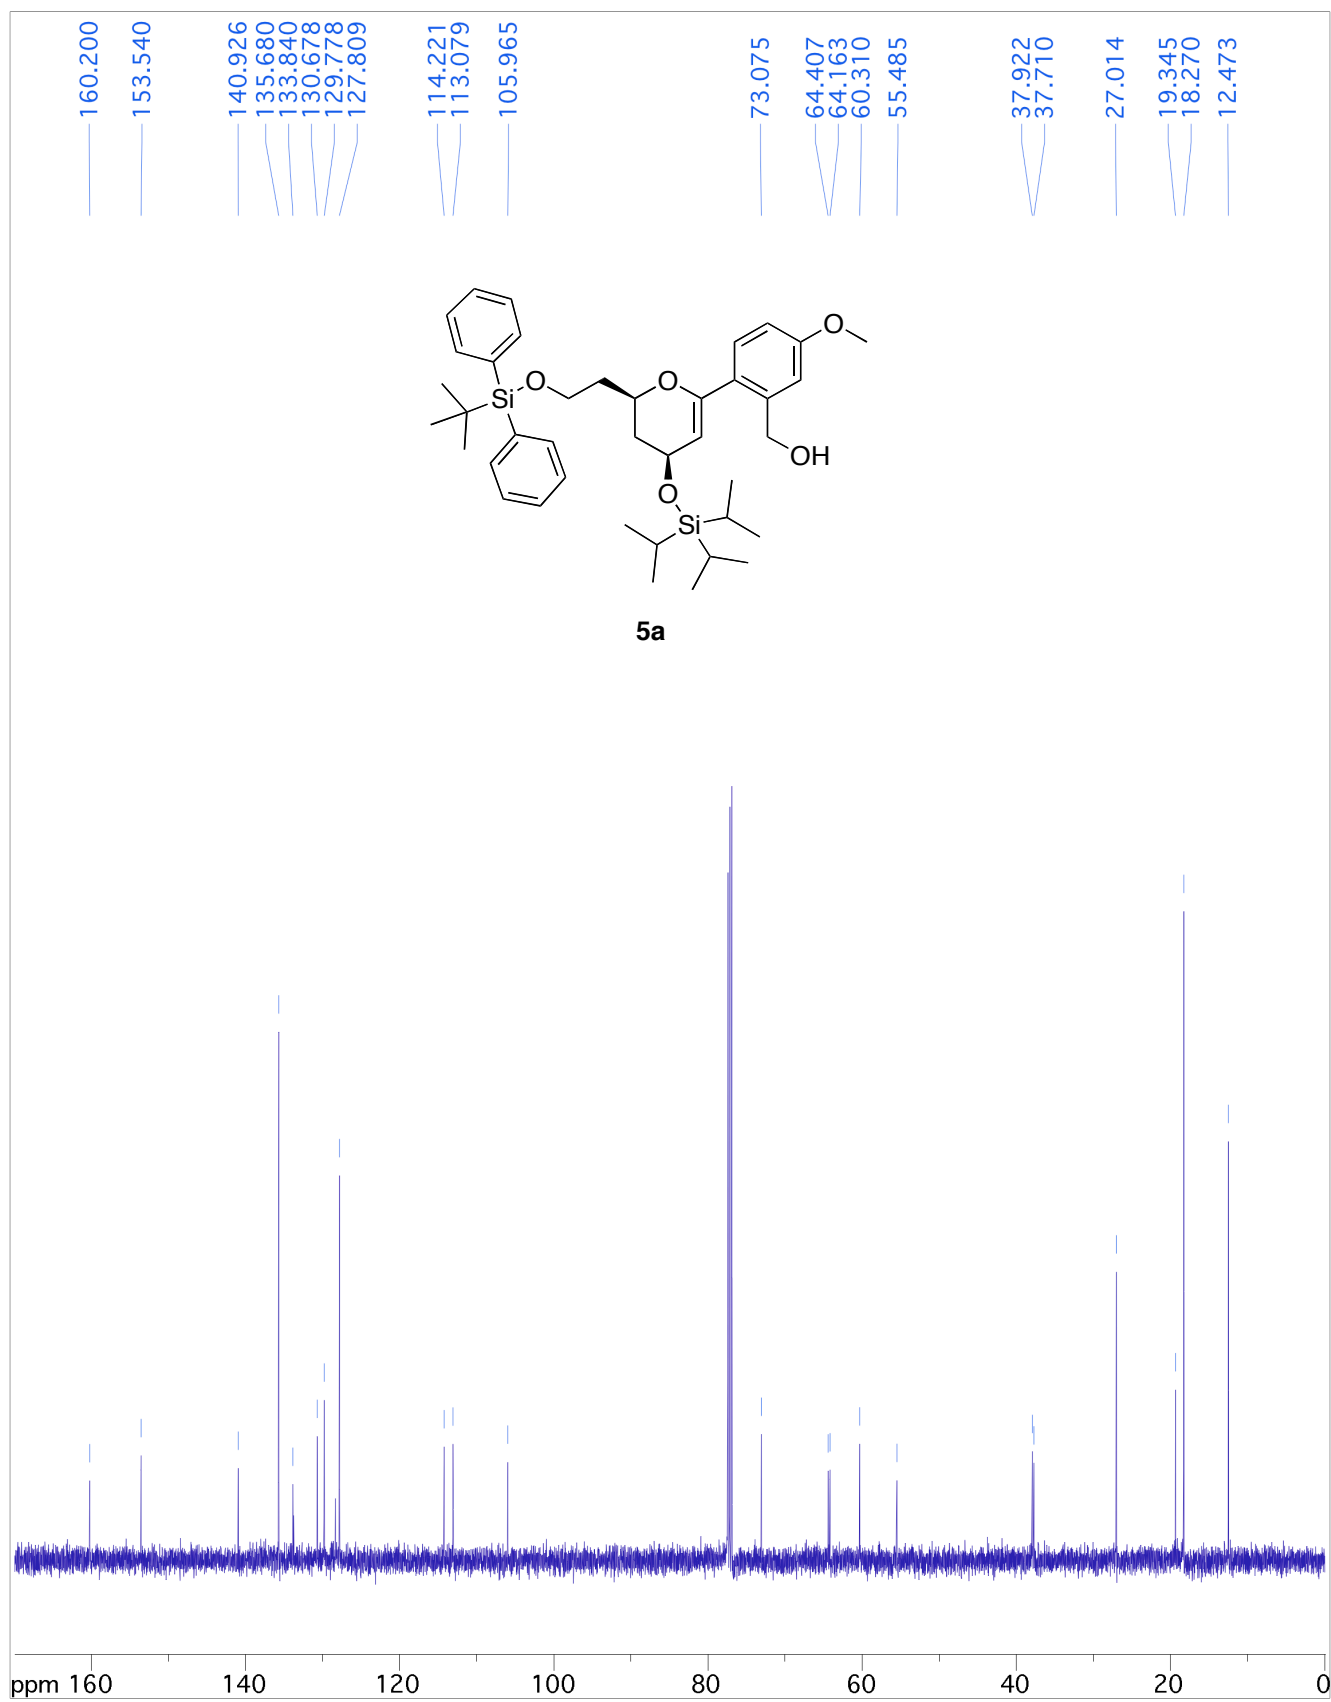

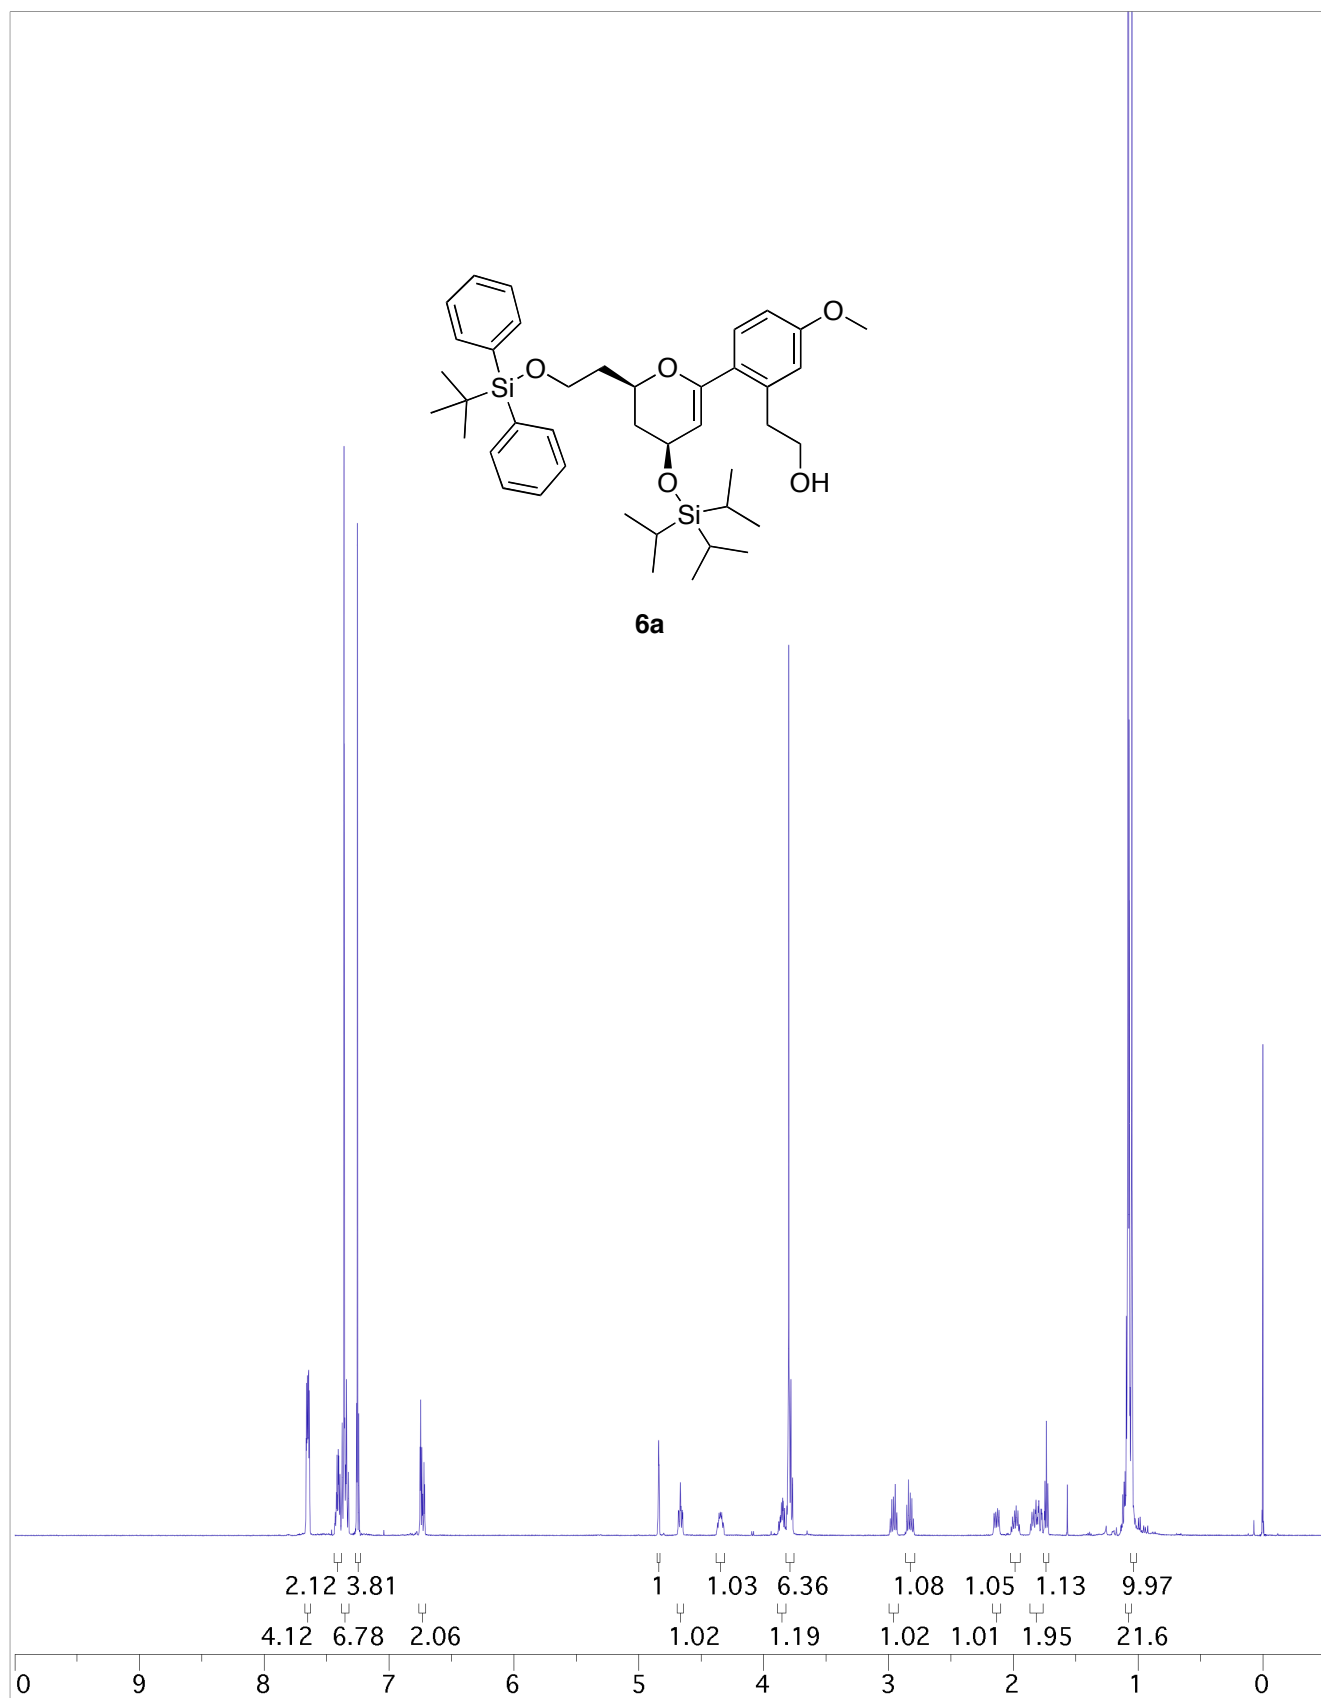

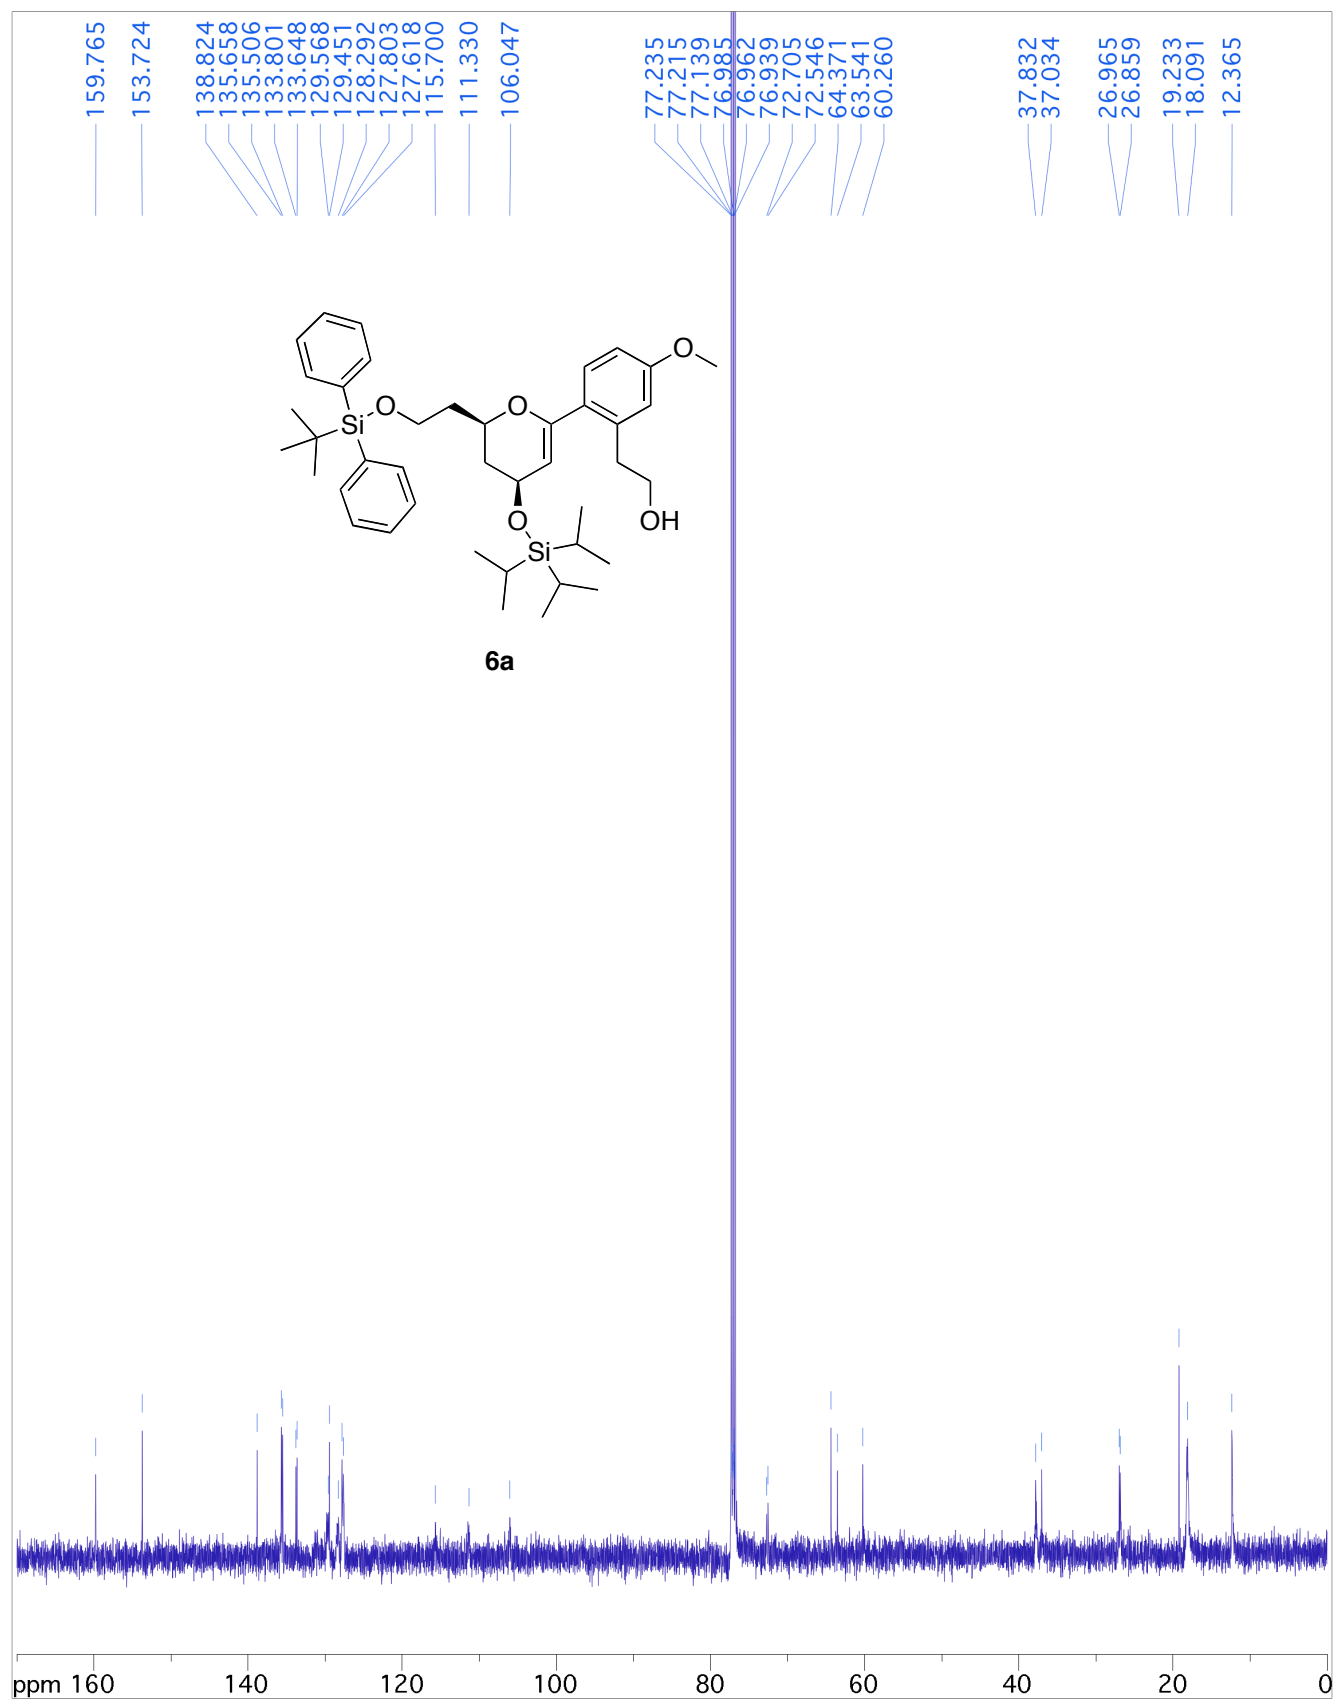

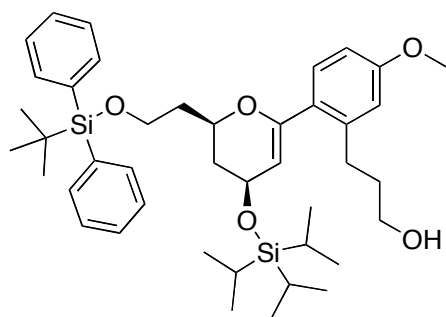**7a**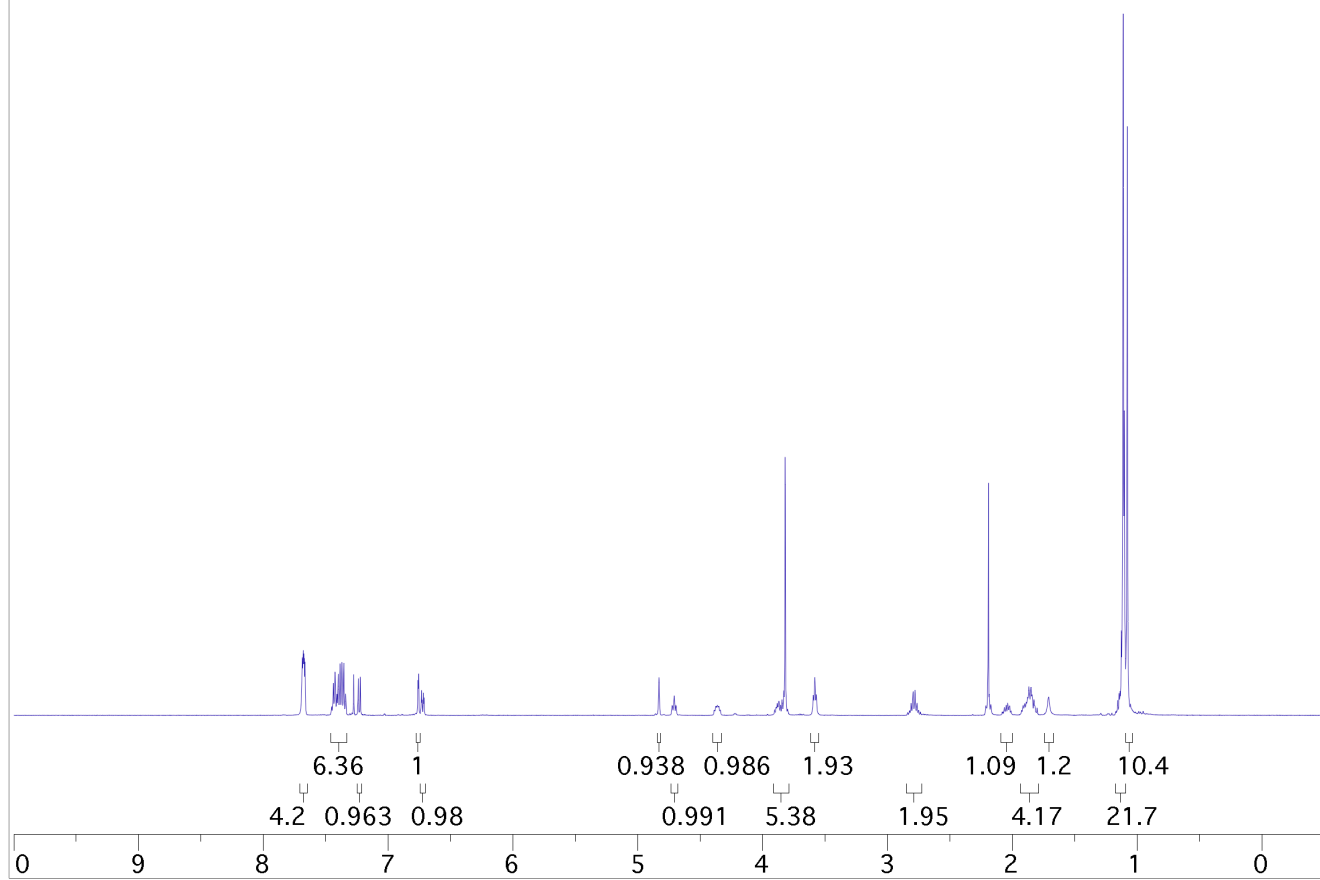

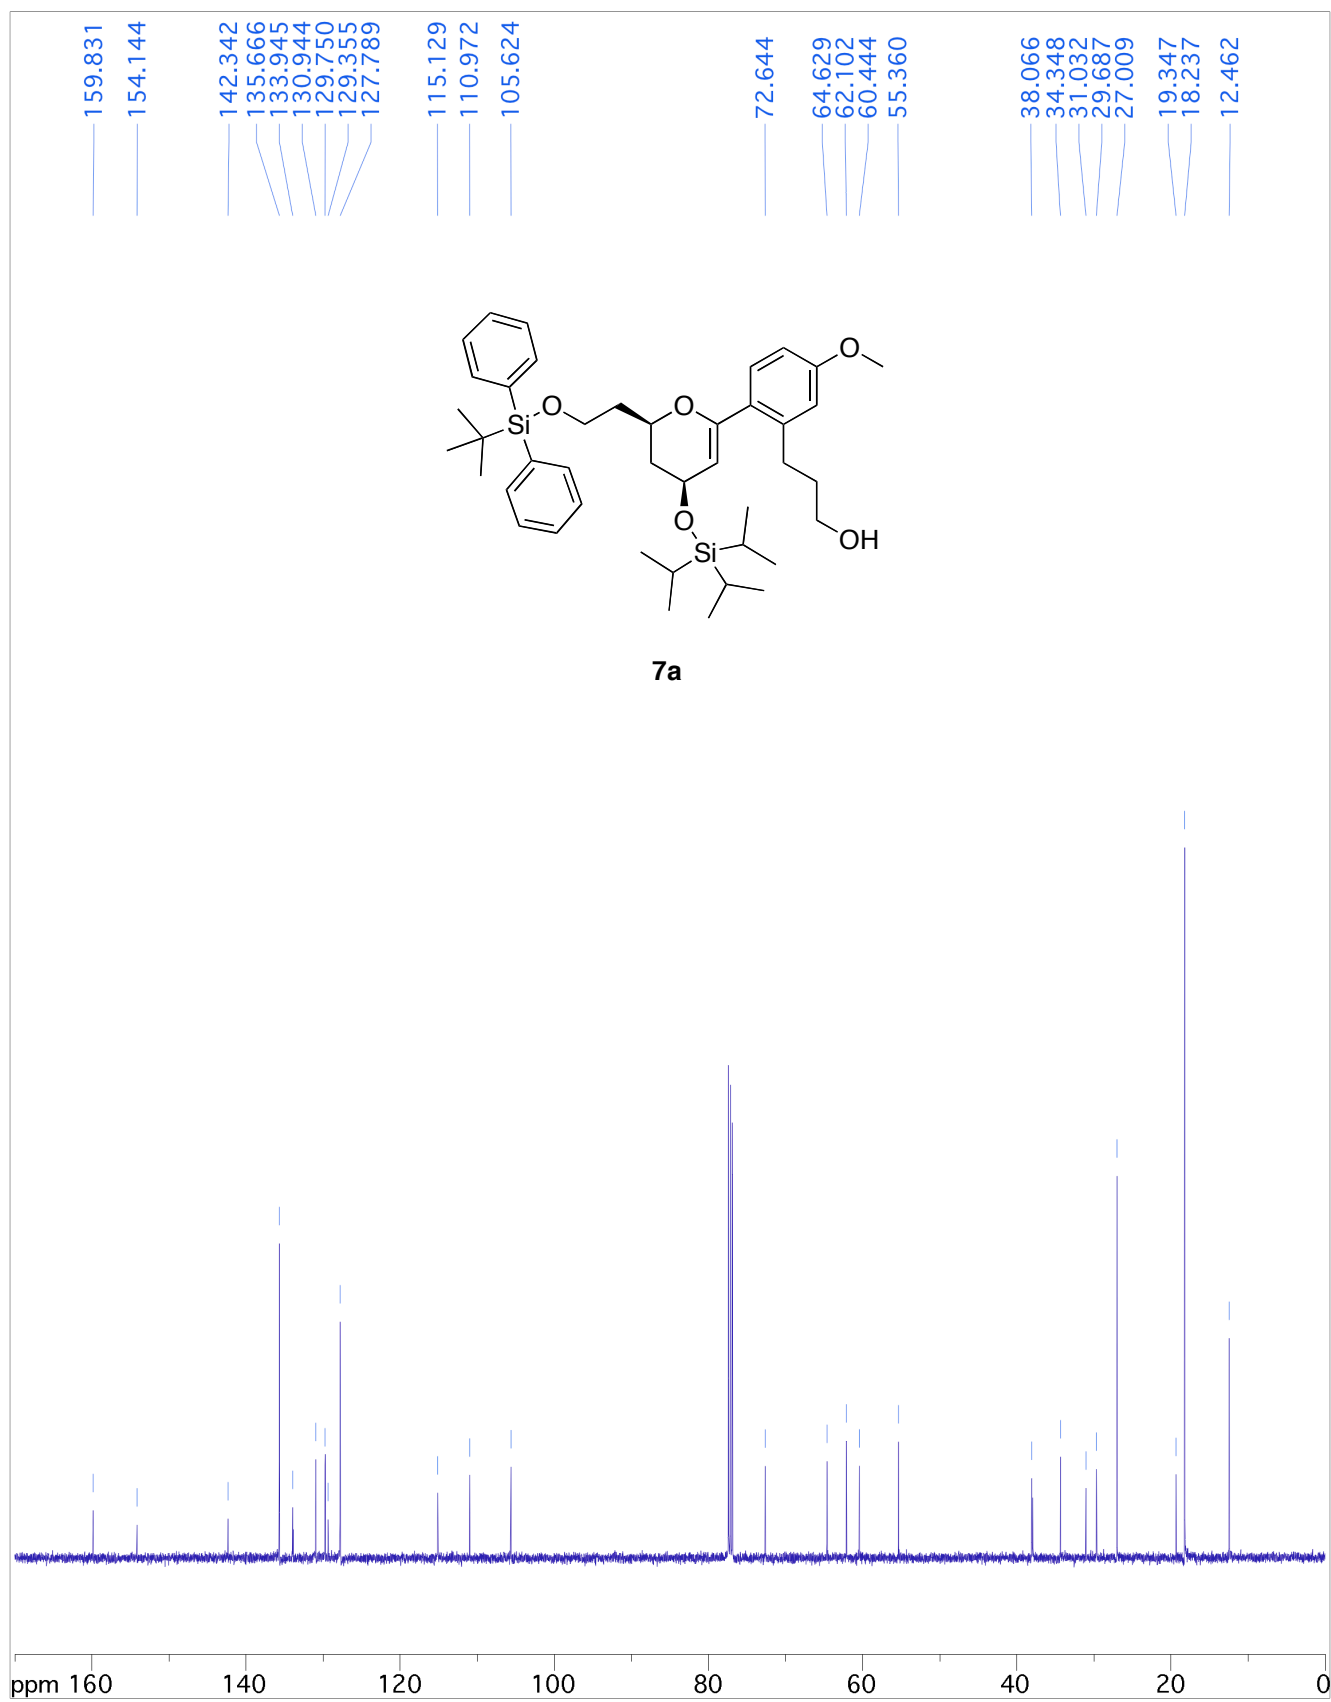

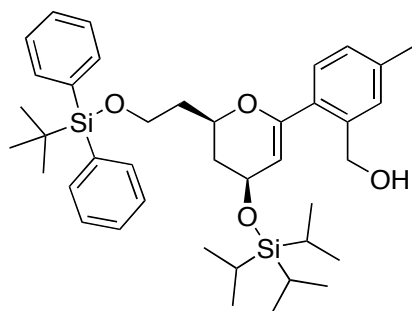**5b**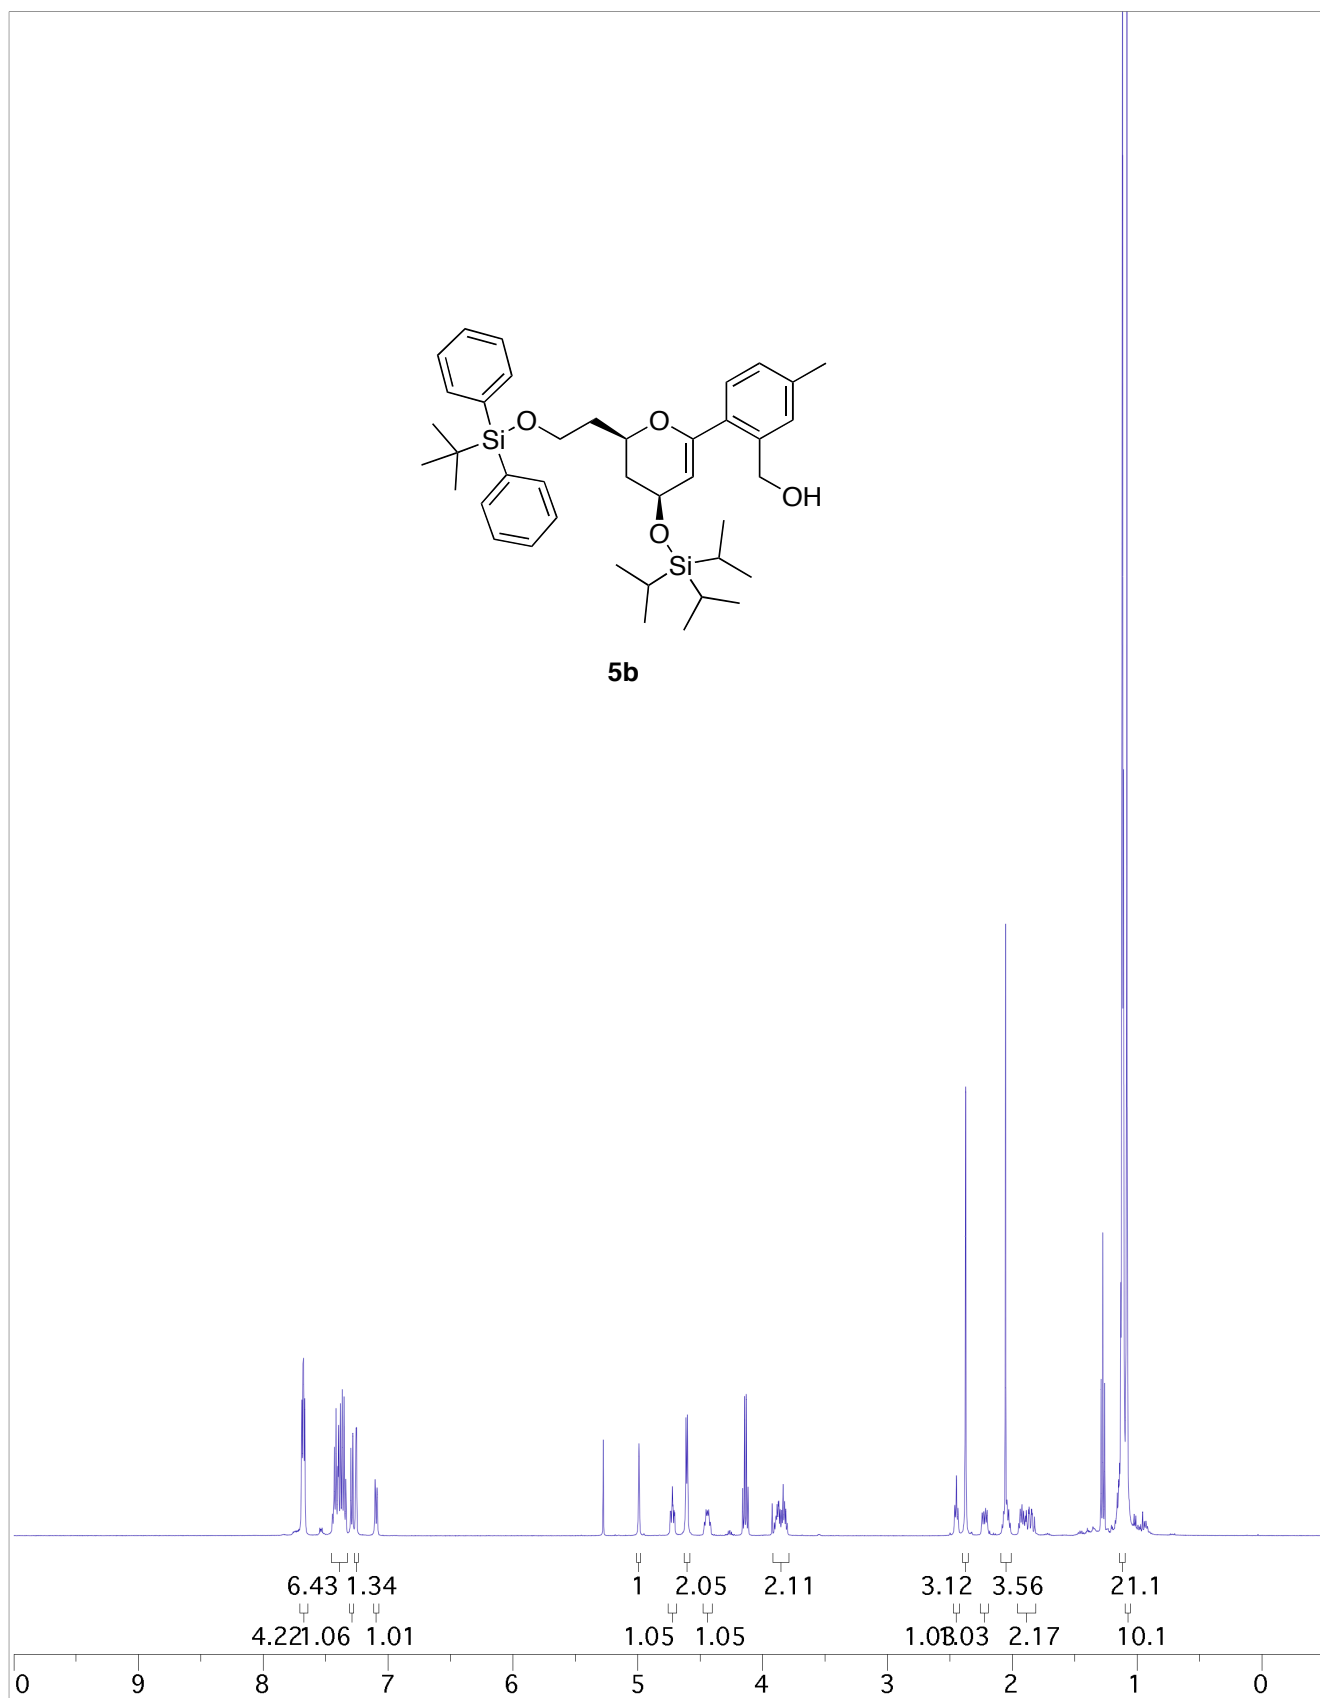

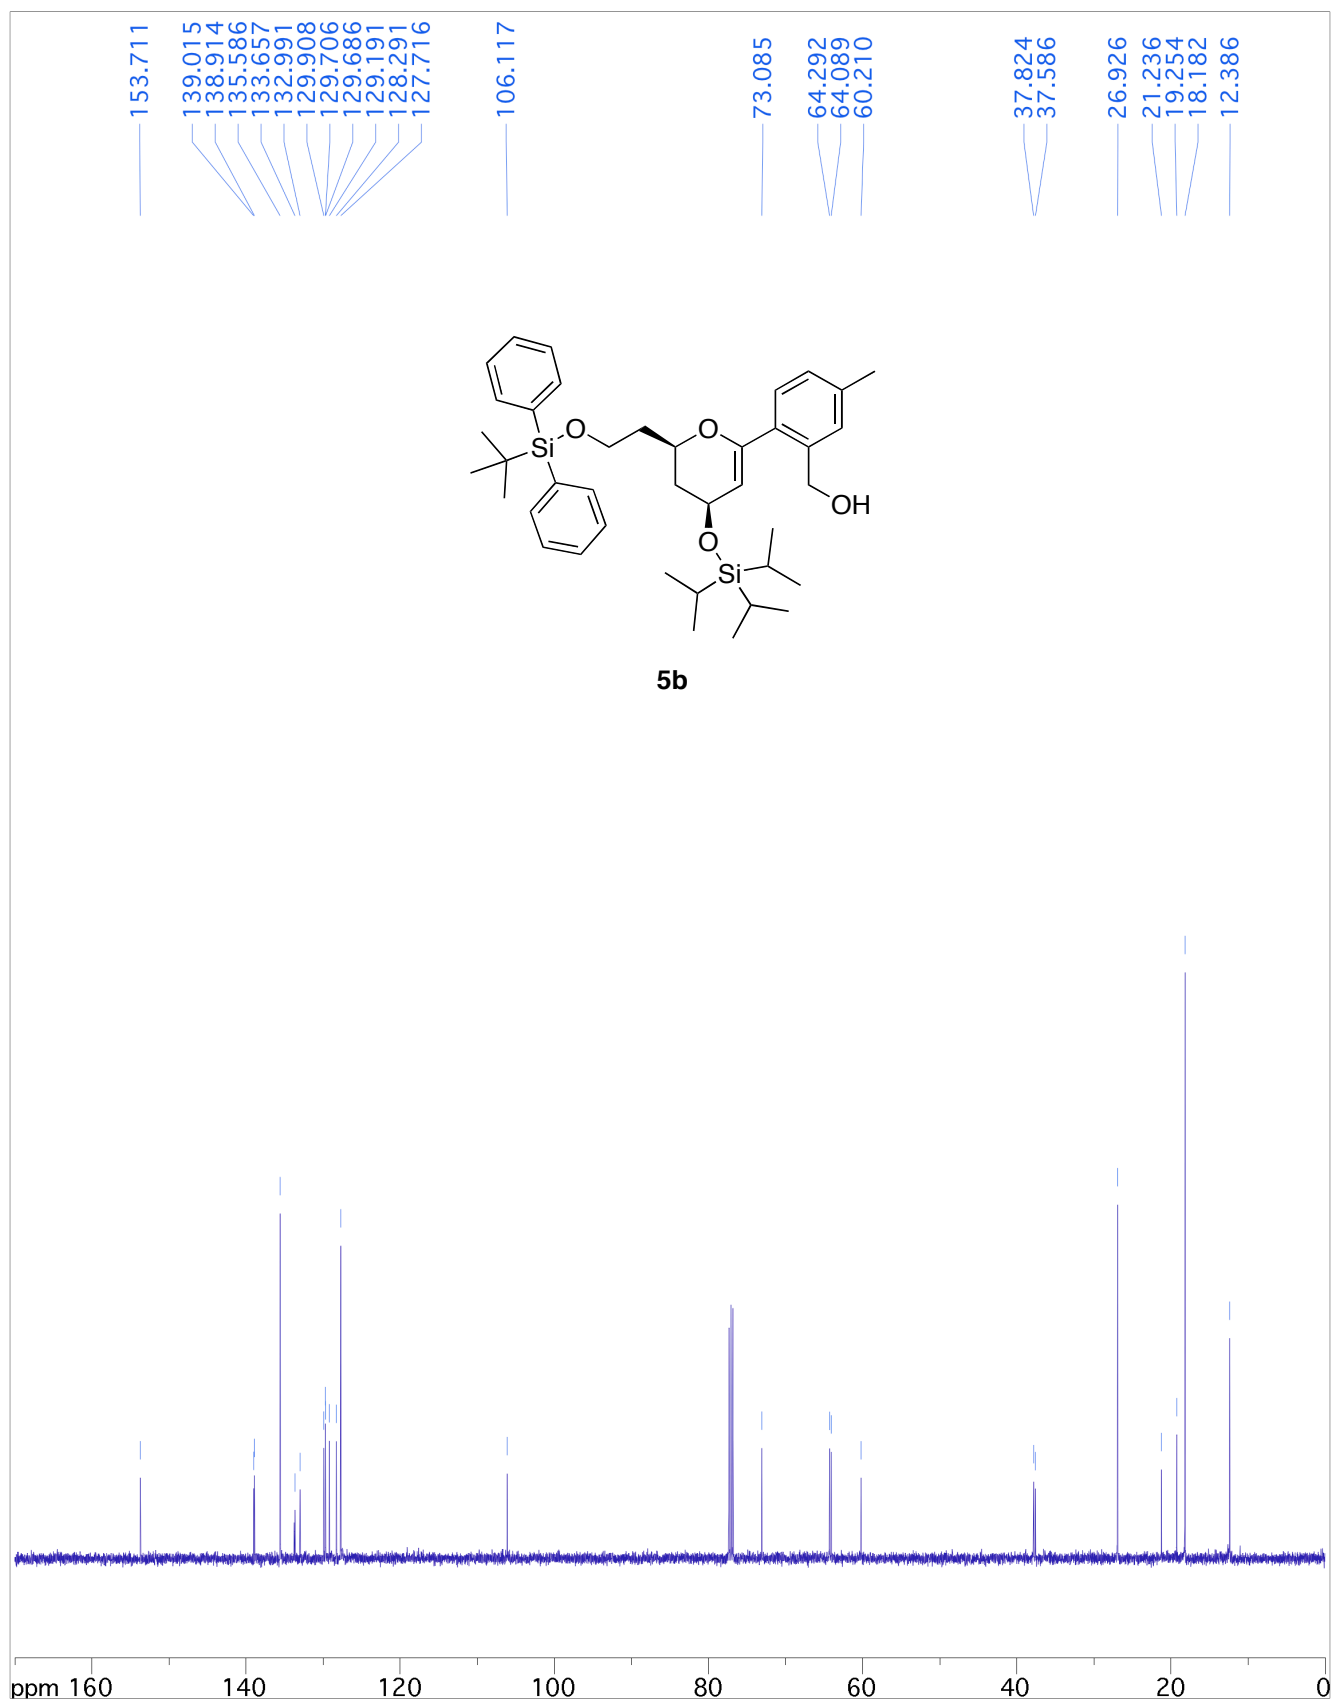

153.711

139.015

138.914

135.586

133.657

132.991

129.908

129.706

129.686

129.191

128.291

127.716

106.117

73.085

64.292

64.089

60.210

37.824

37.586

26.926

21.236

19.254

18.182

12.386

5b

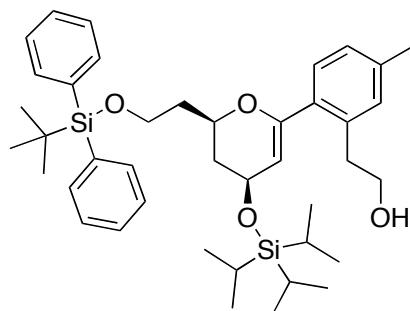**6b**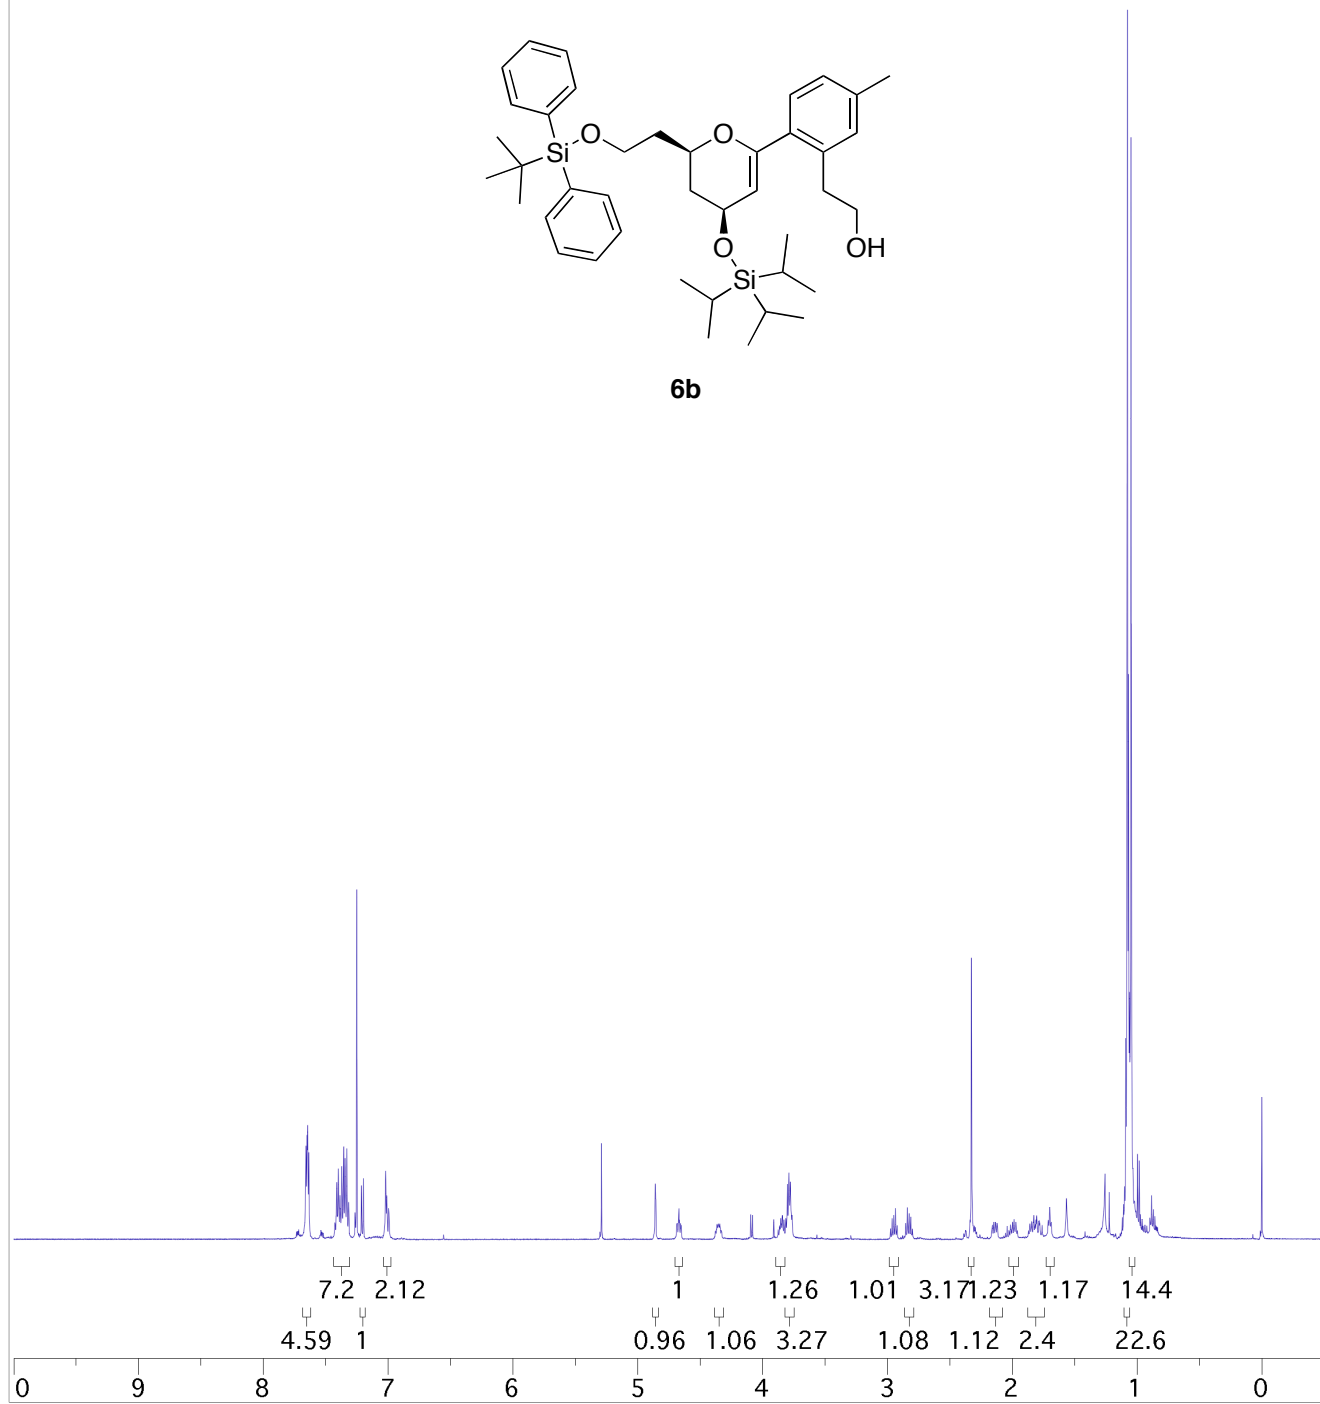





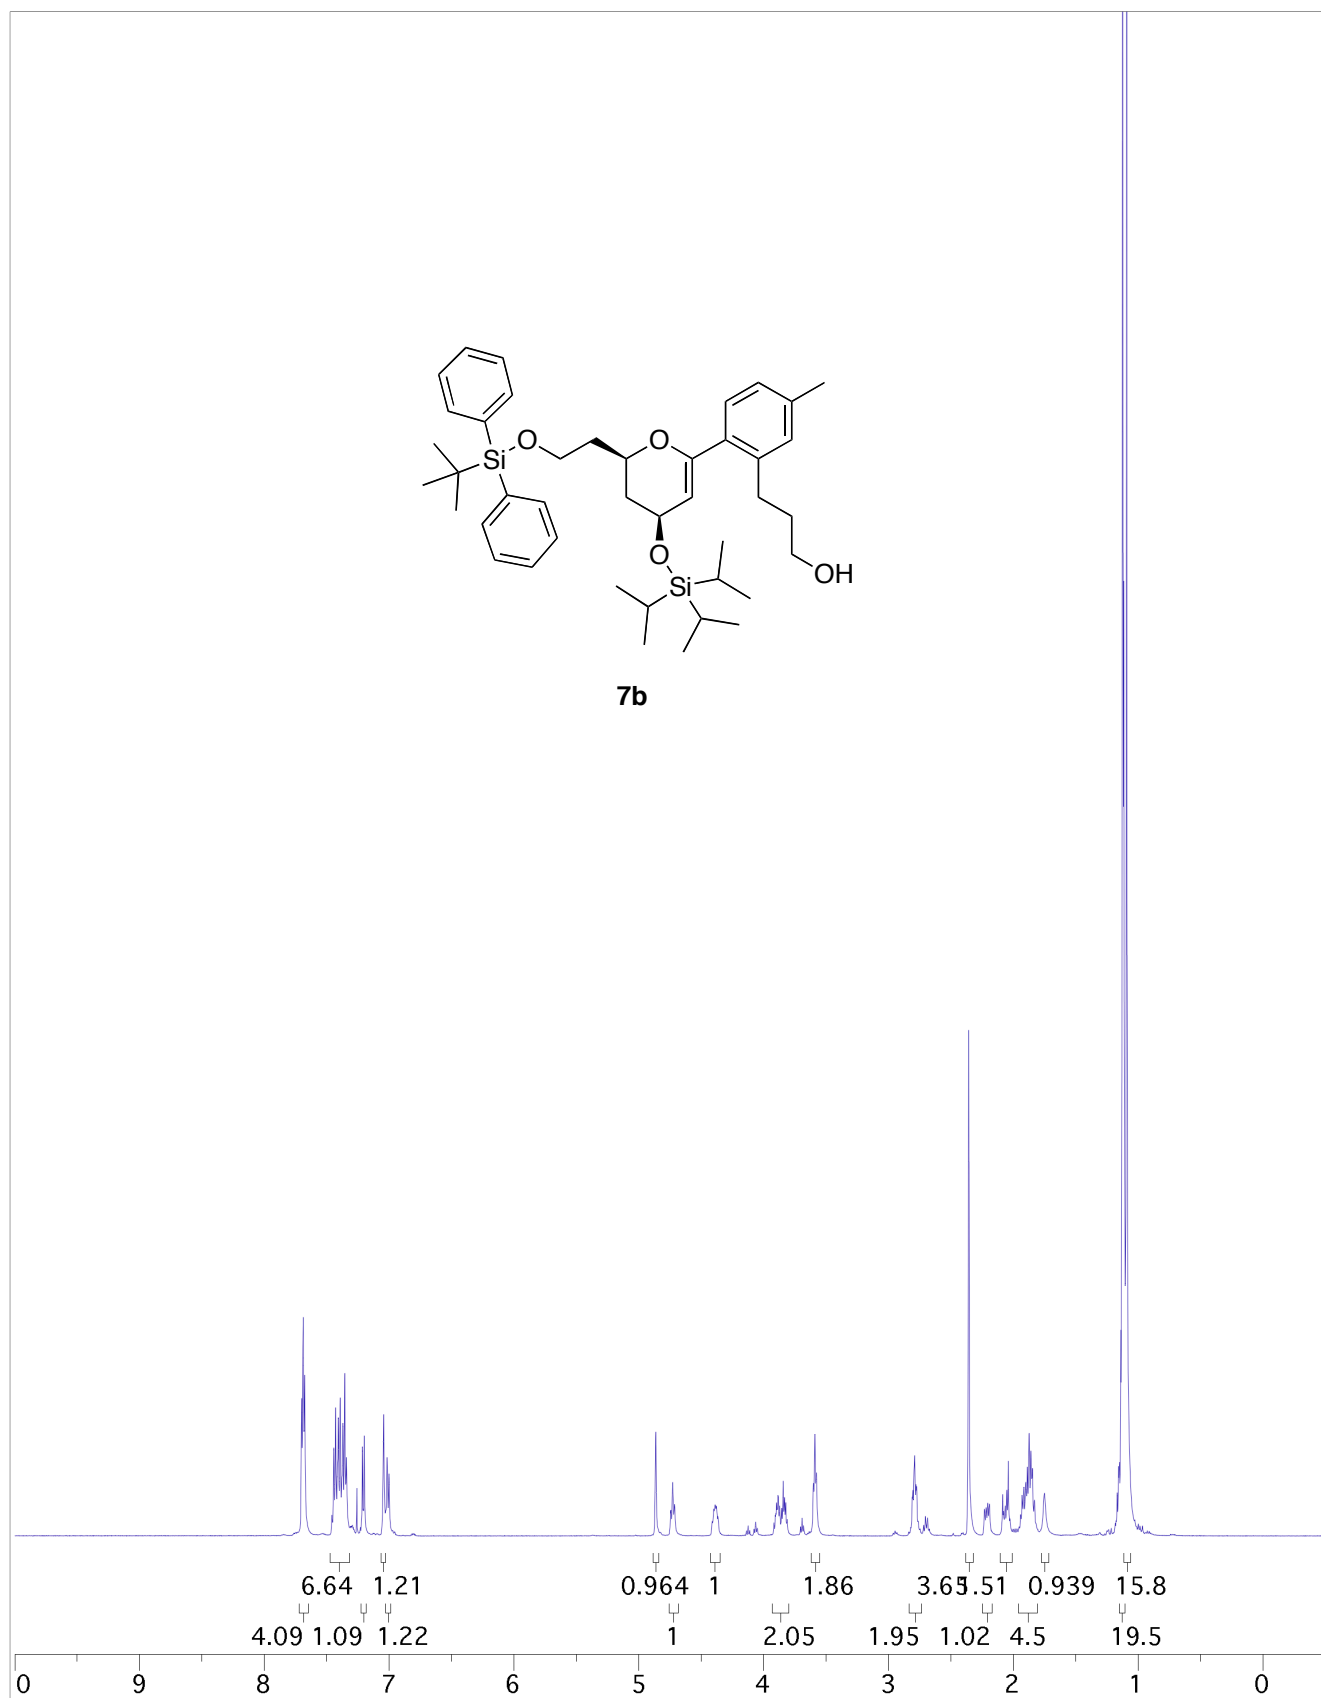

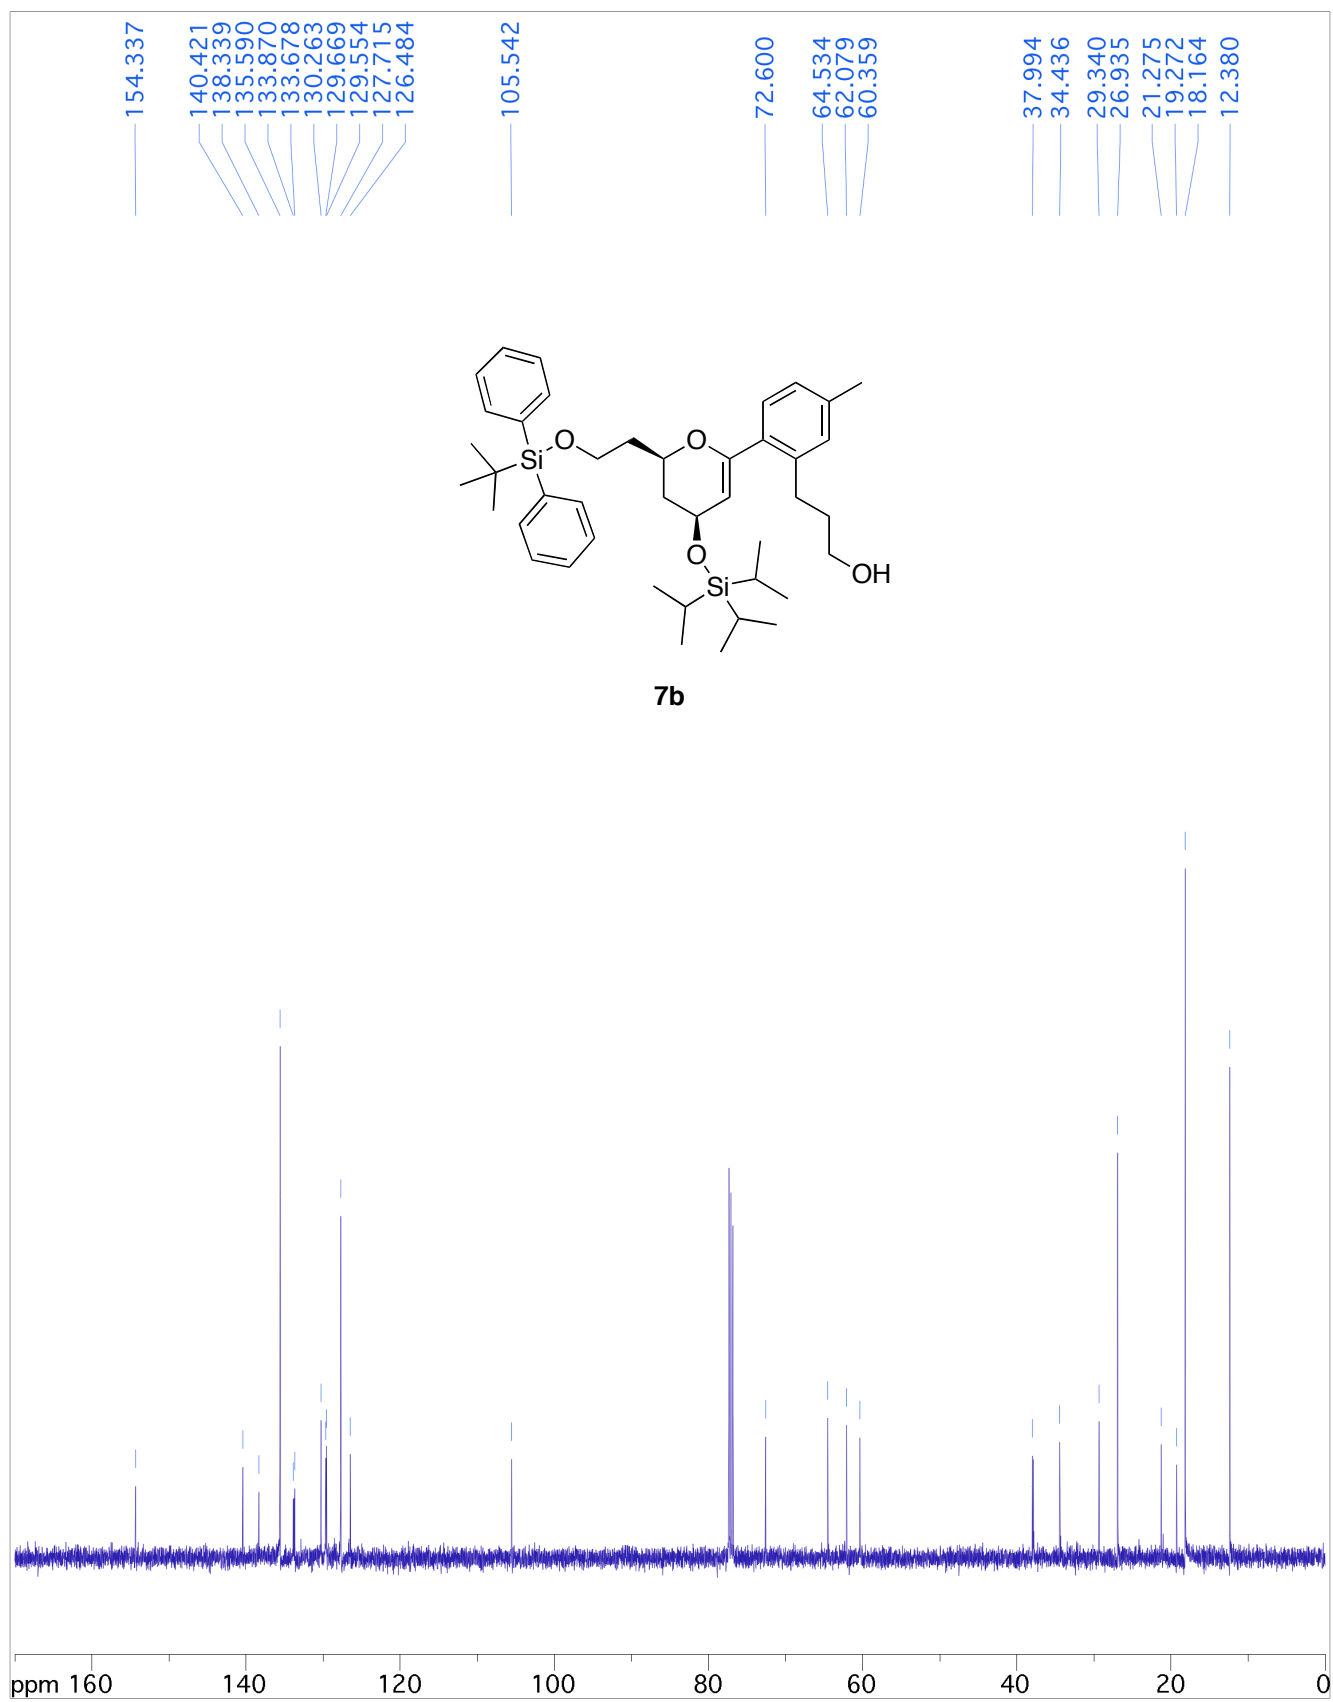

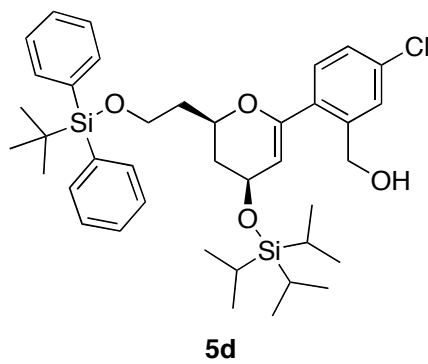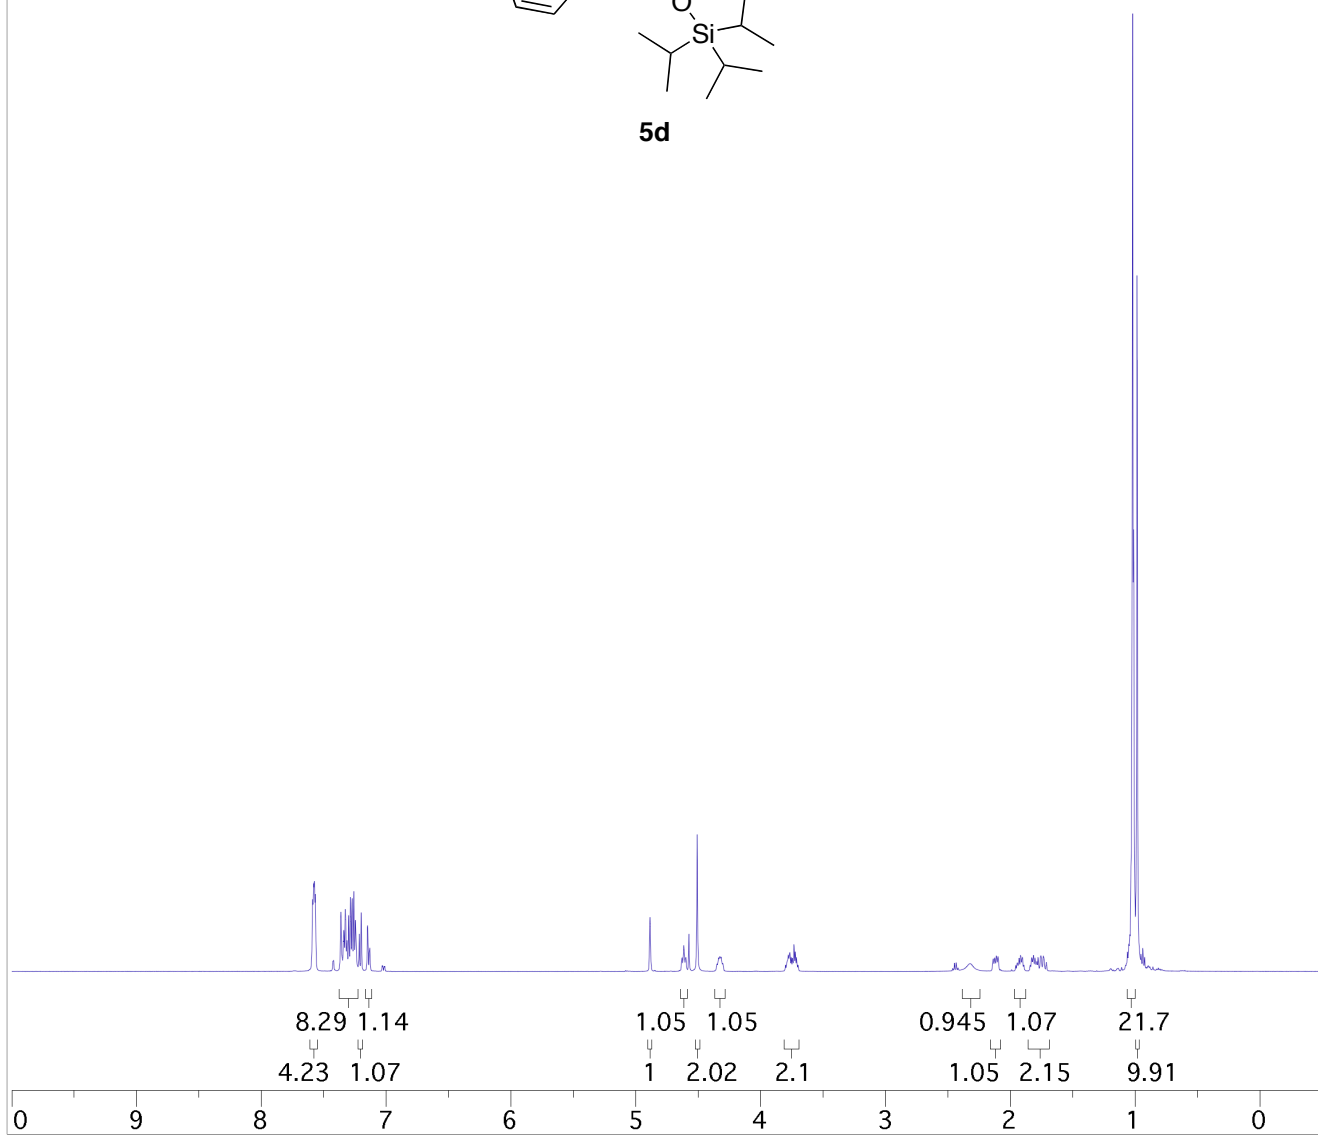

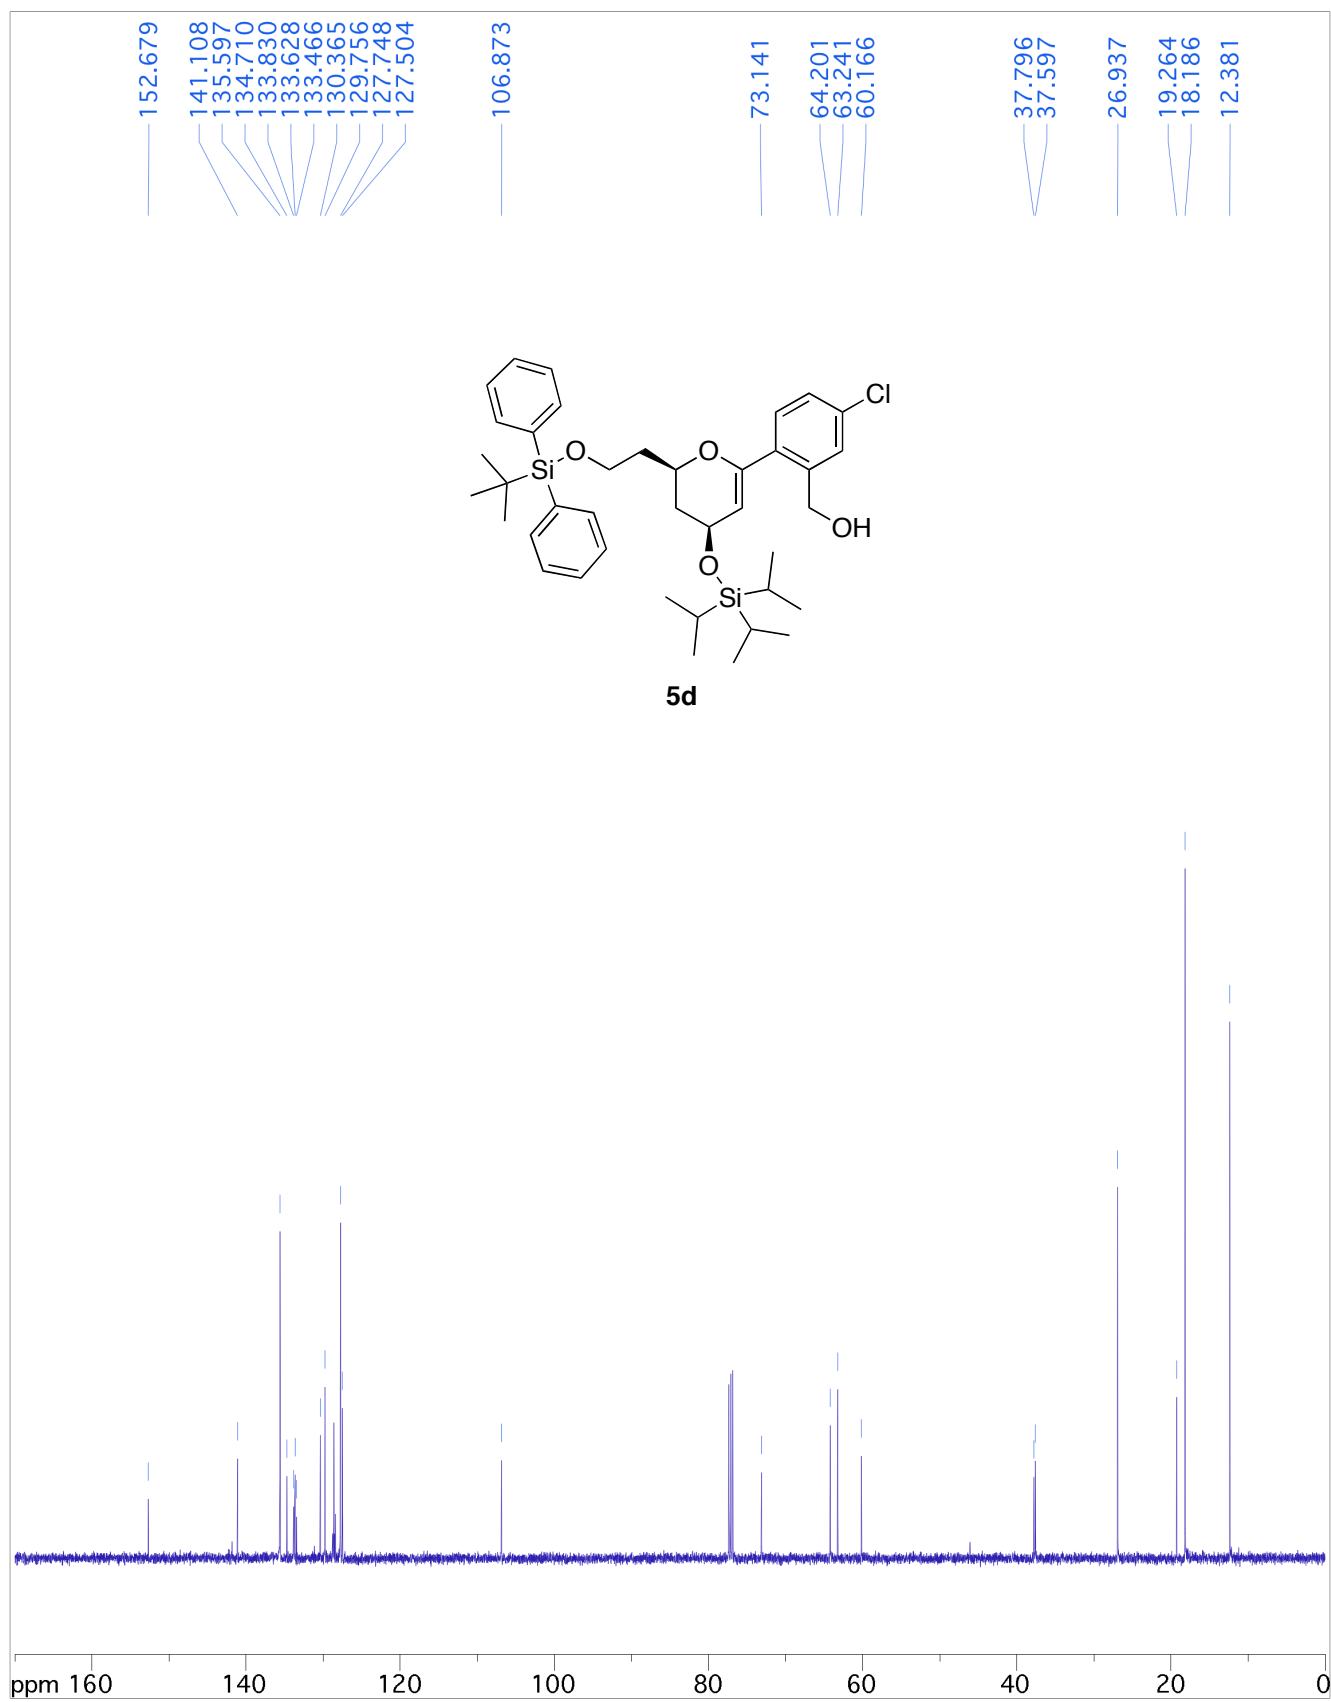

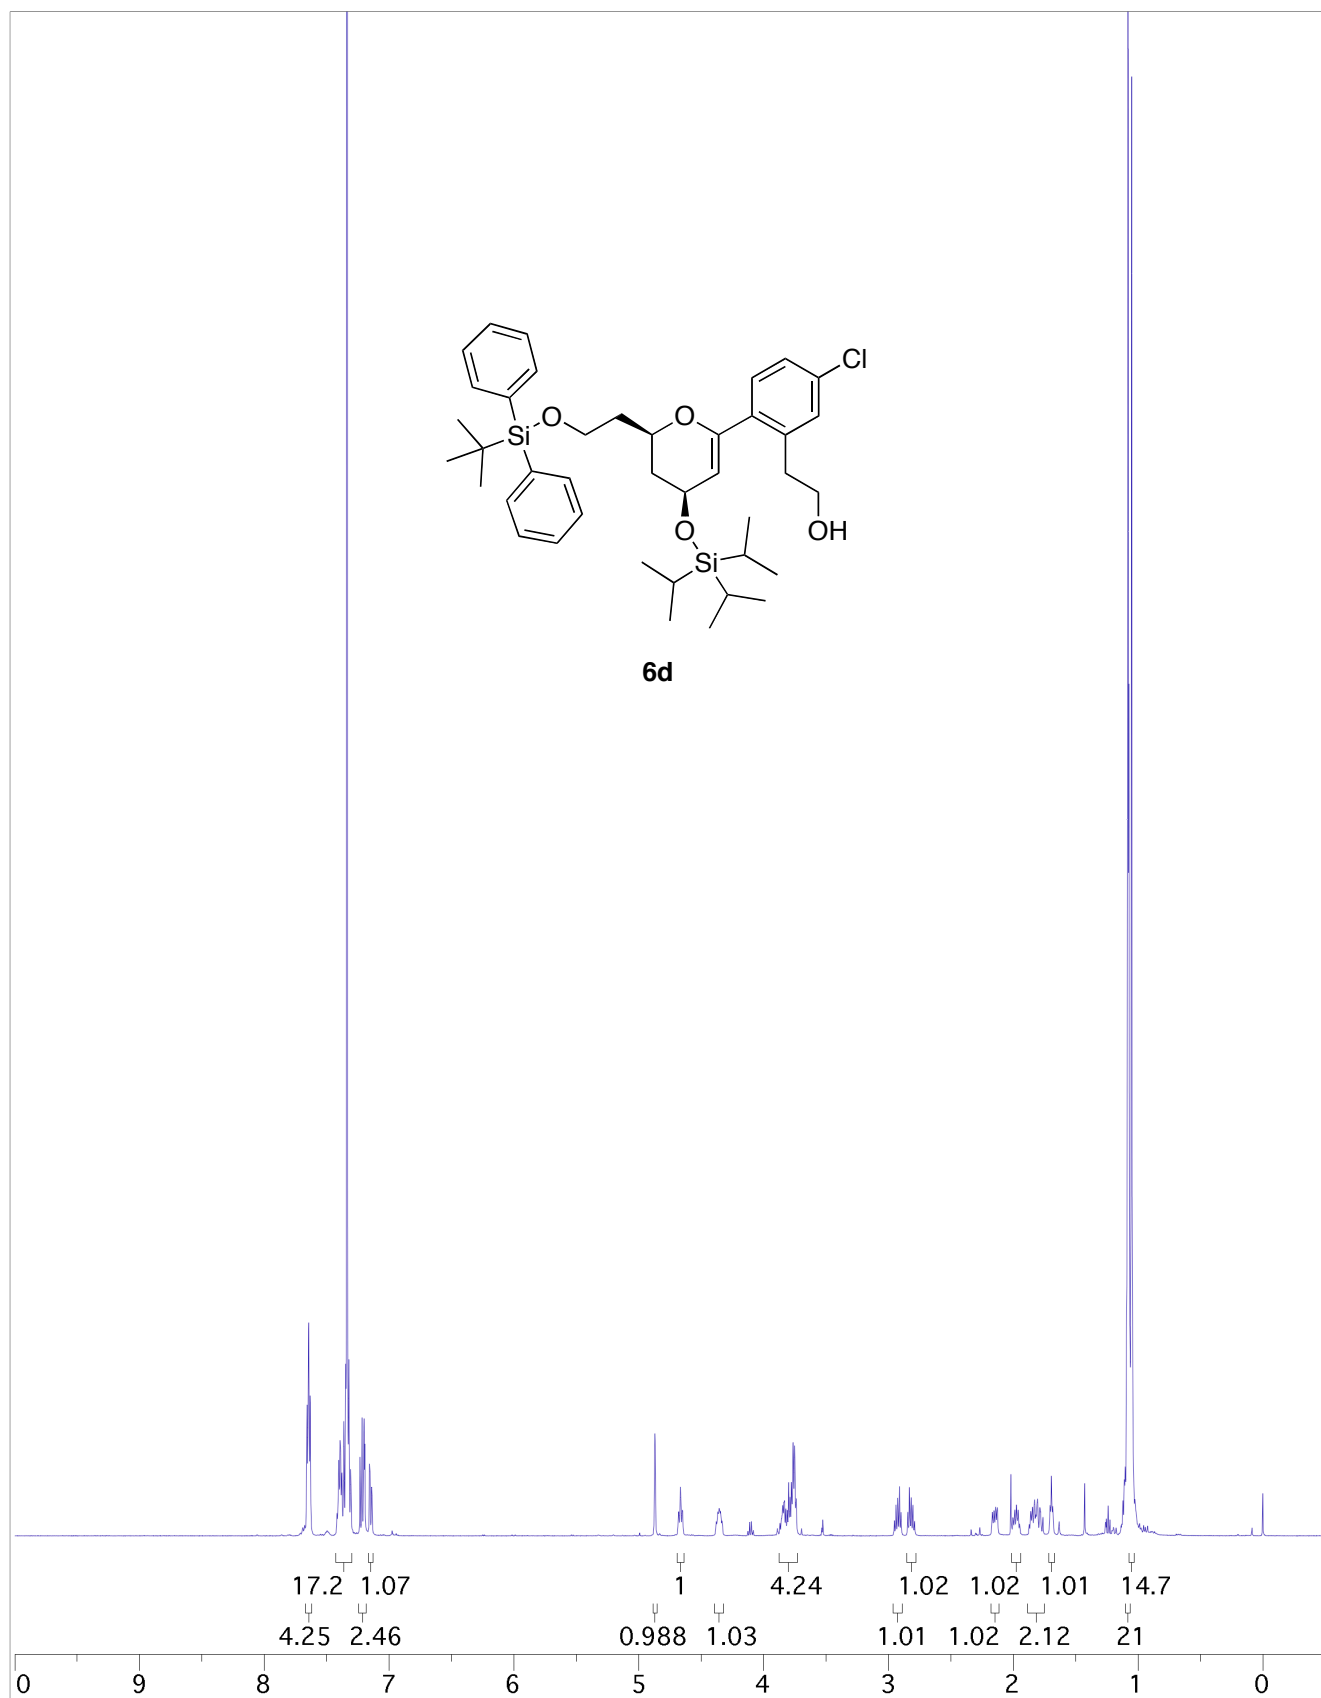

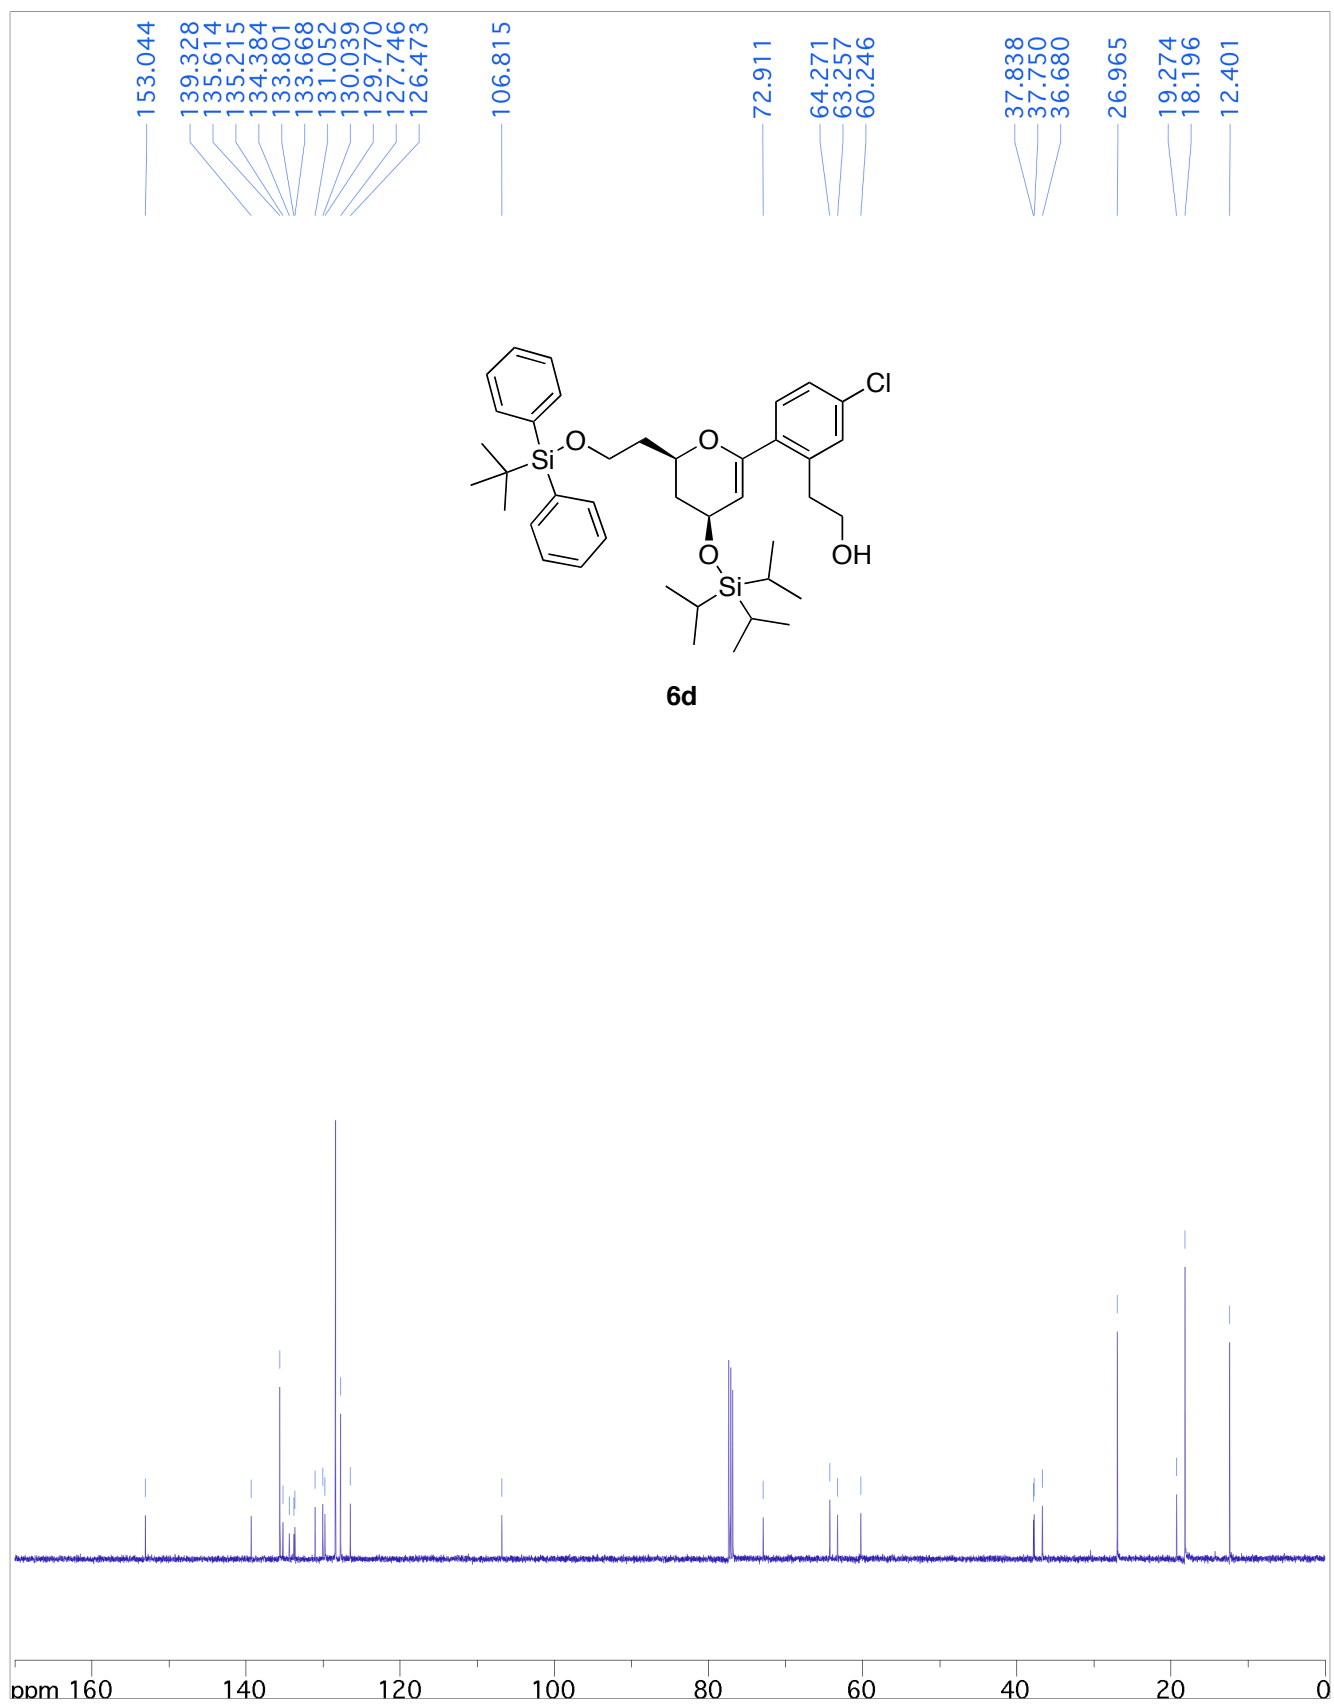

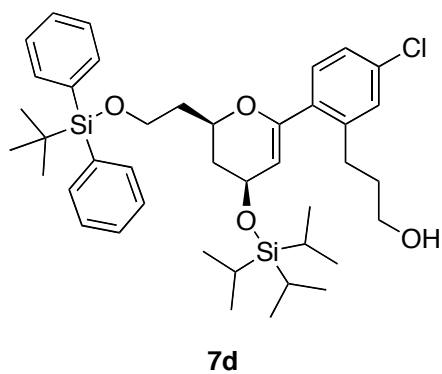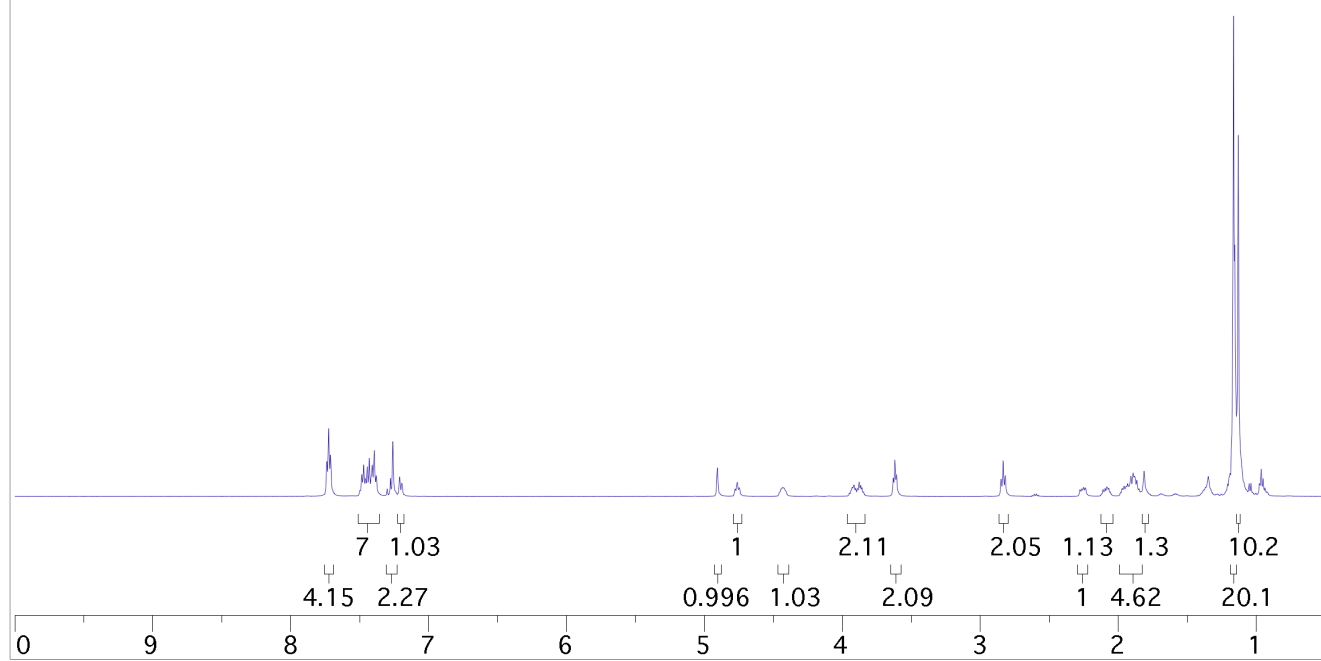



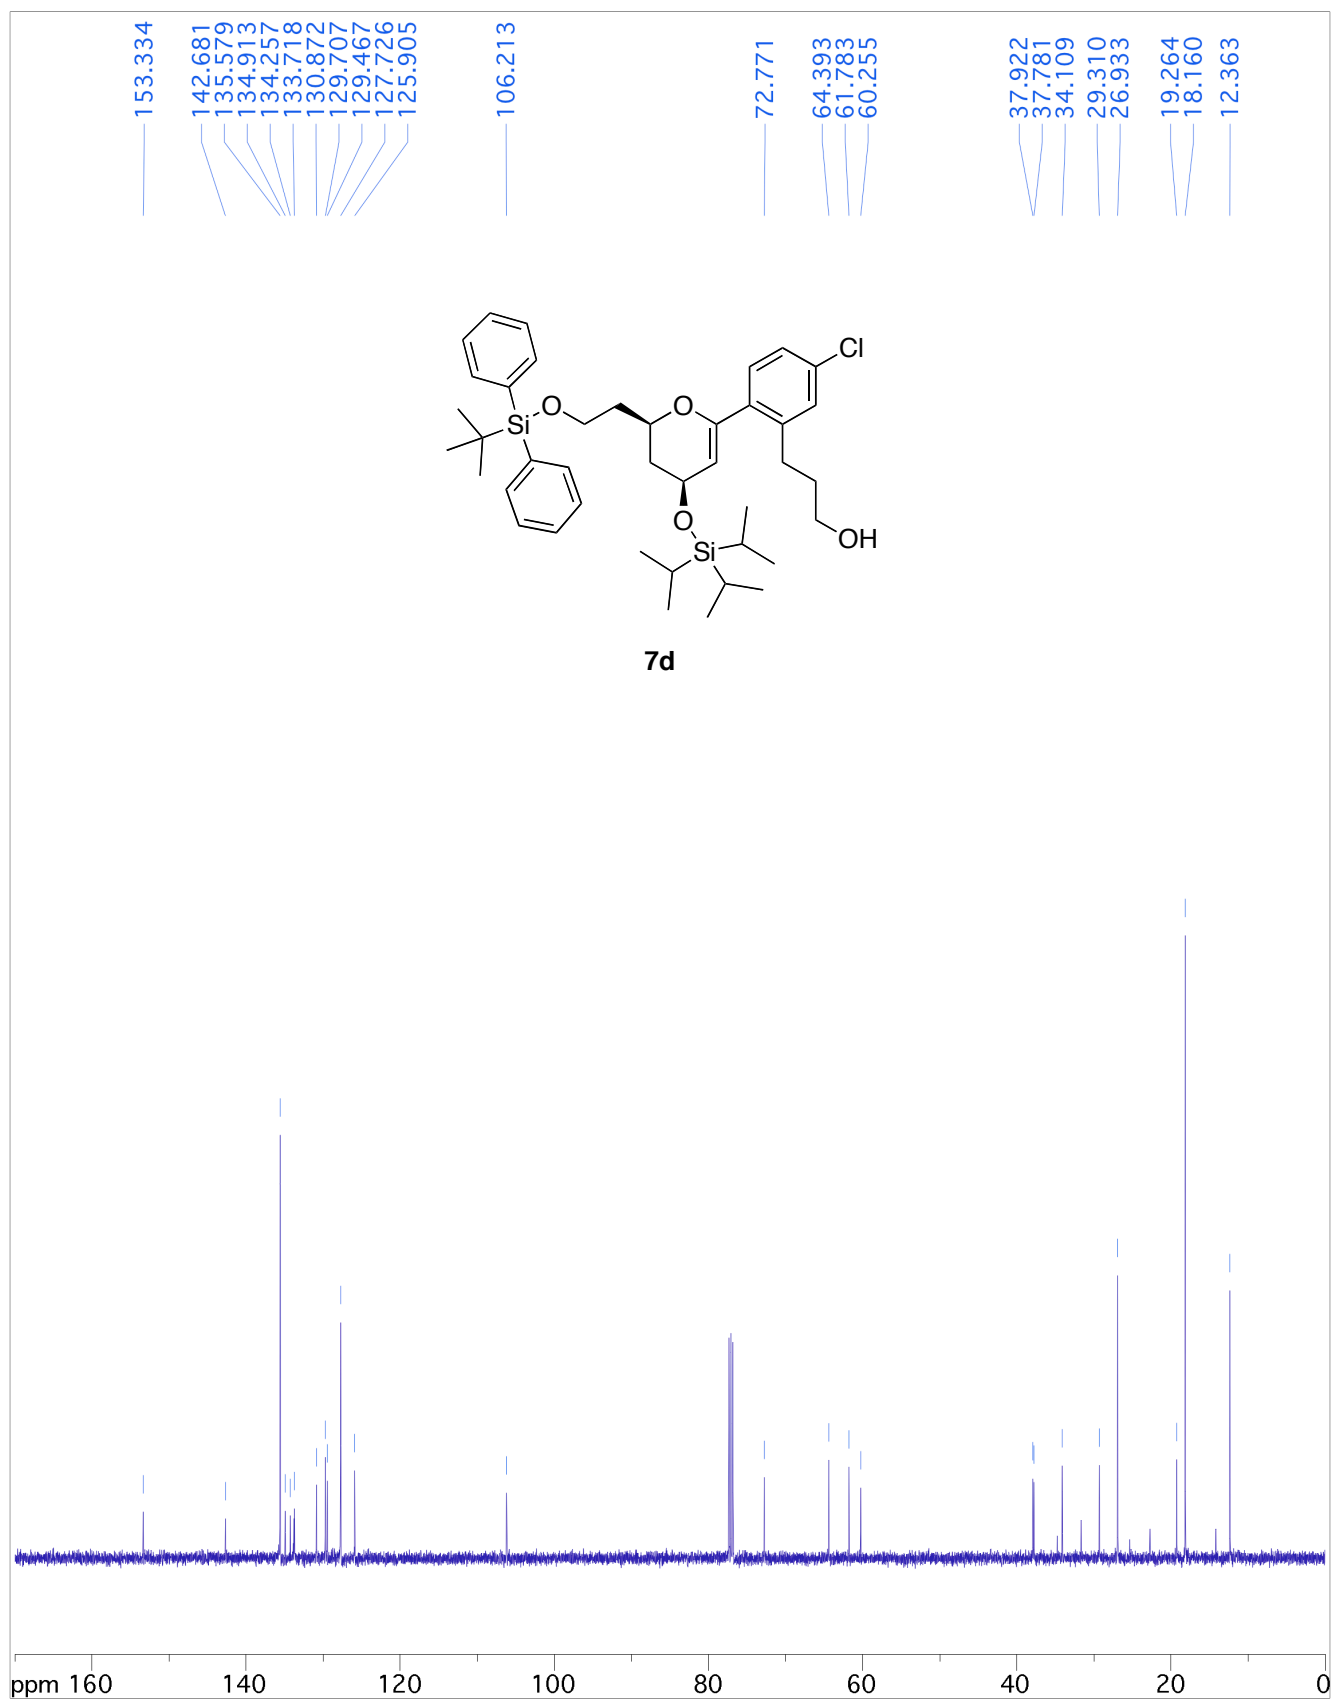

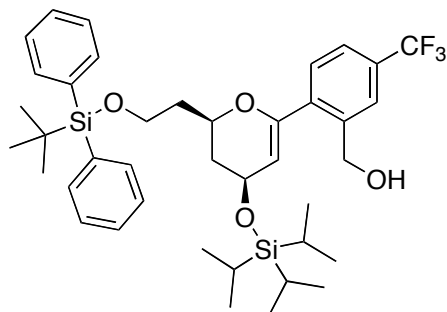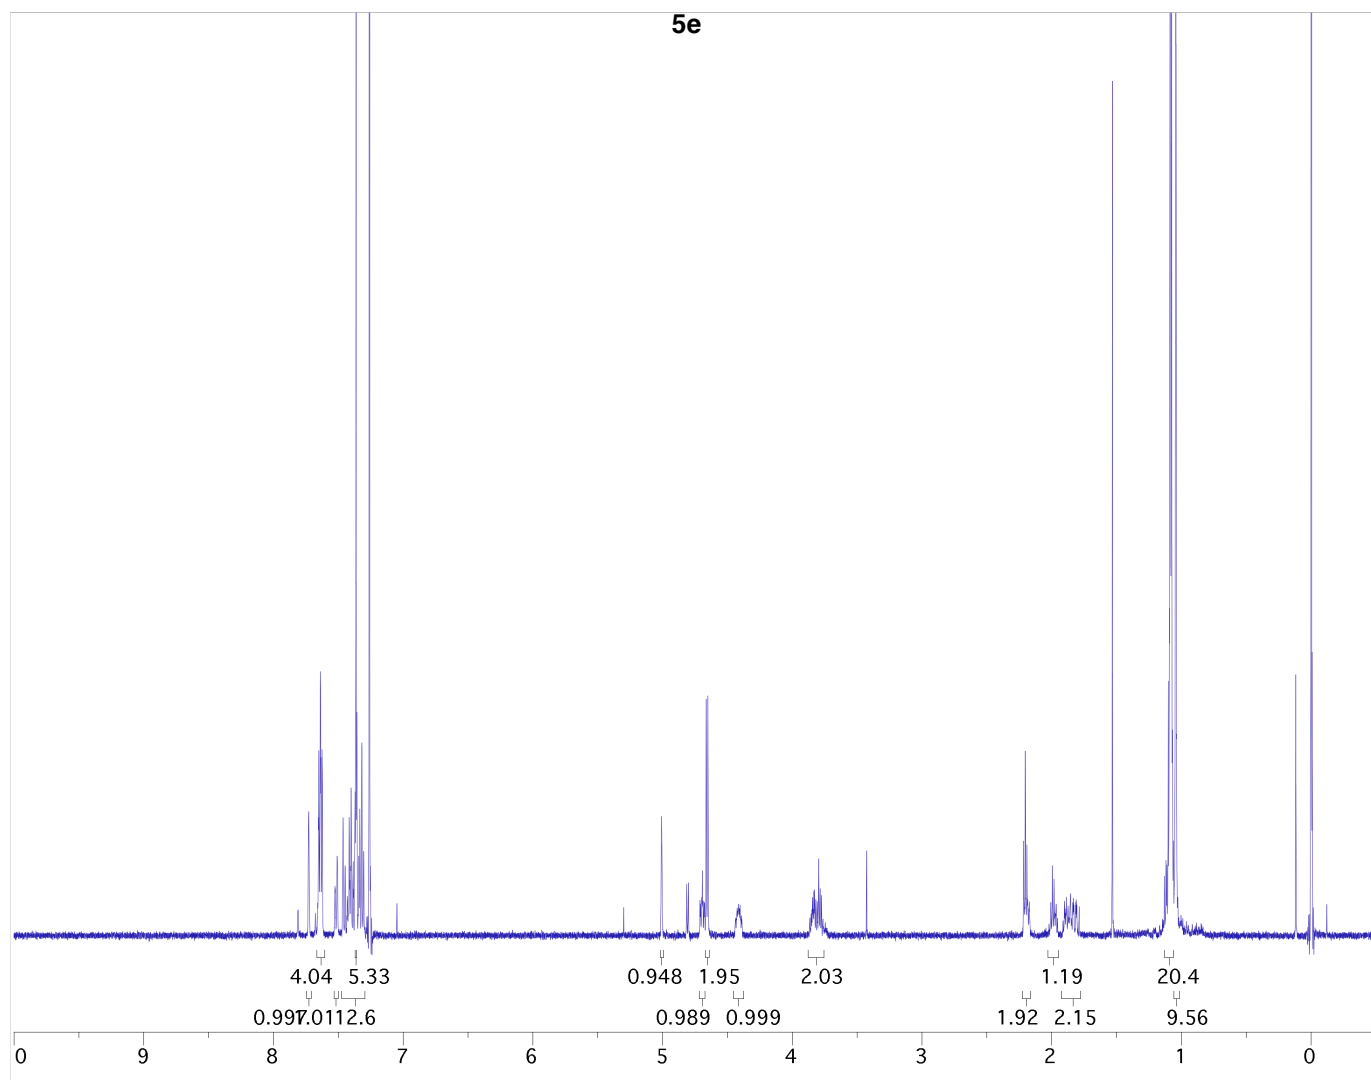

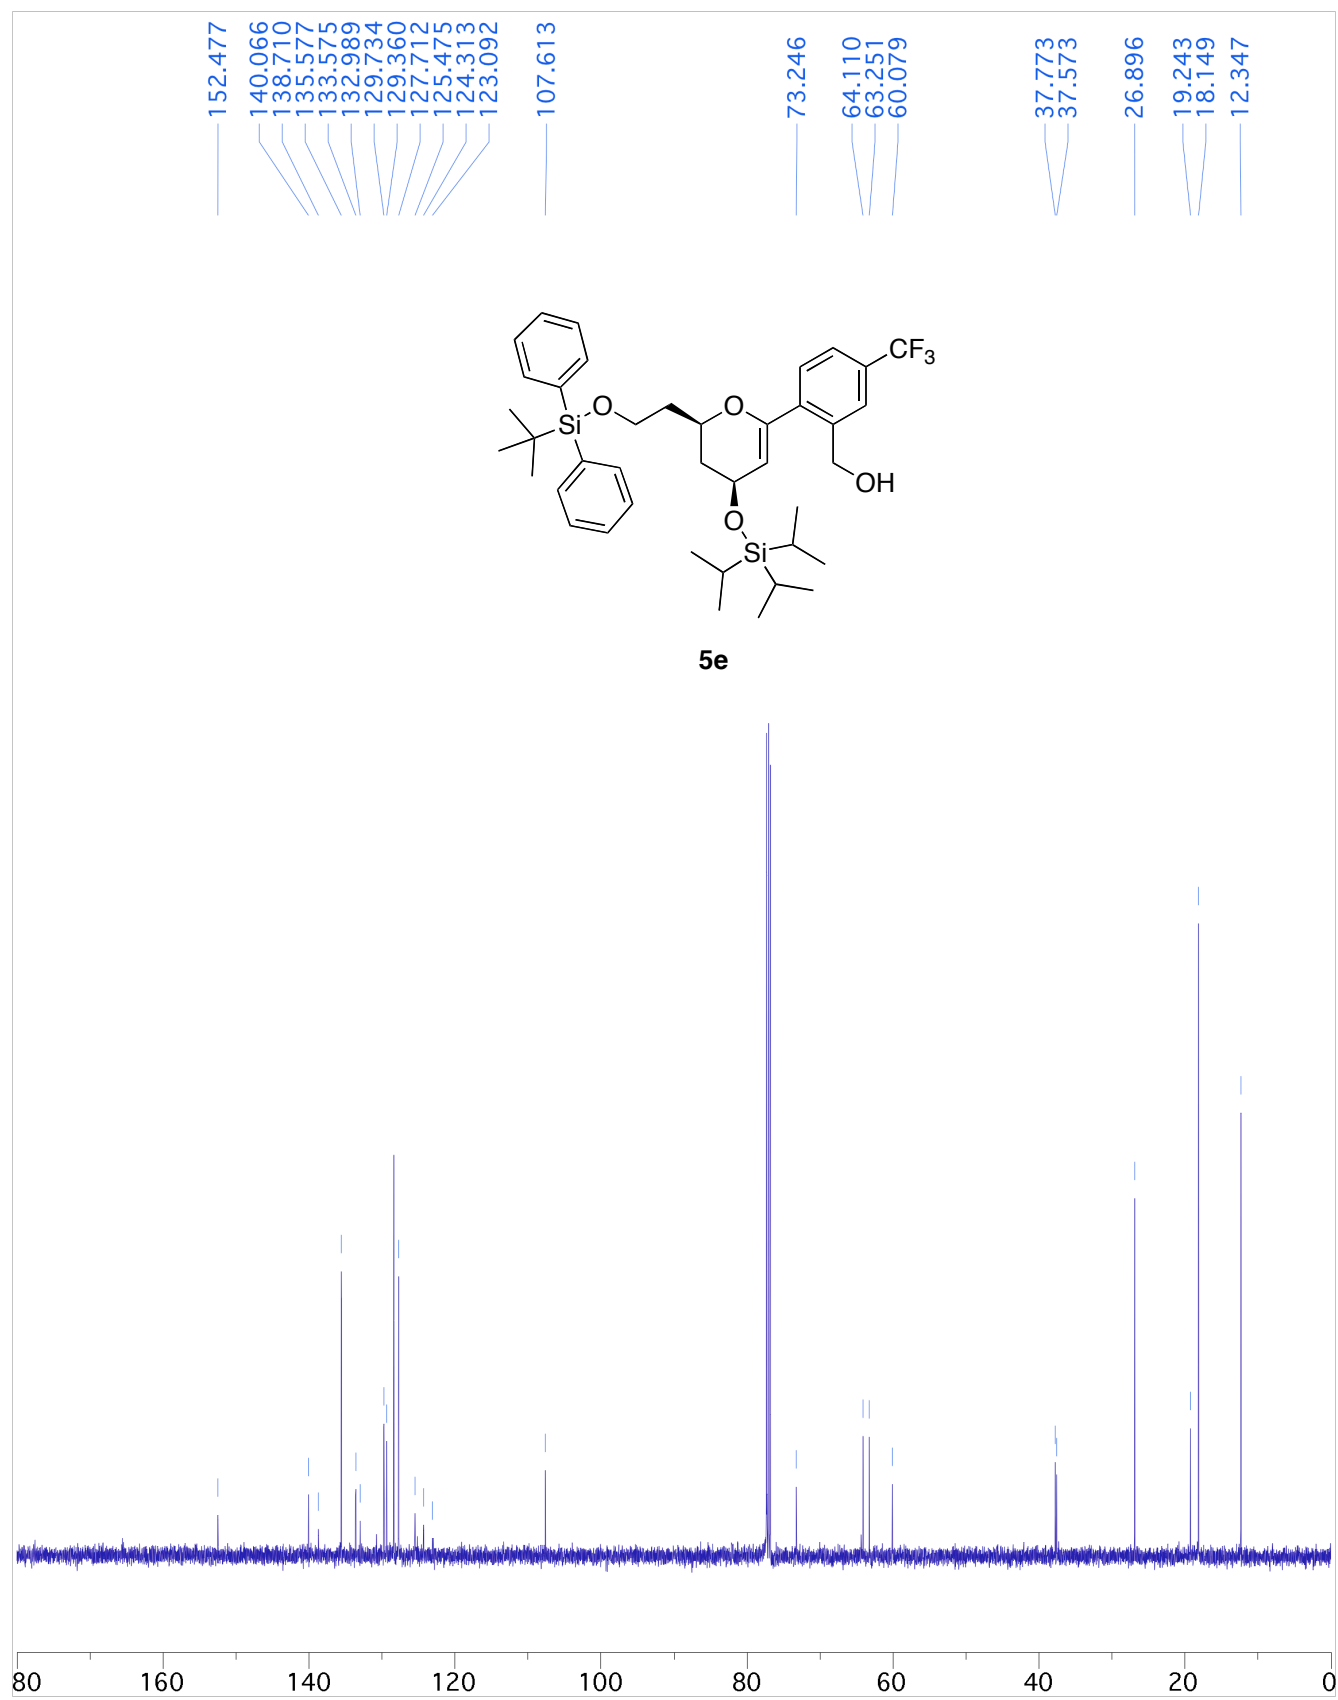

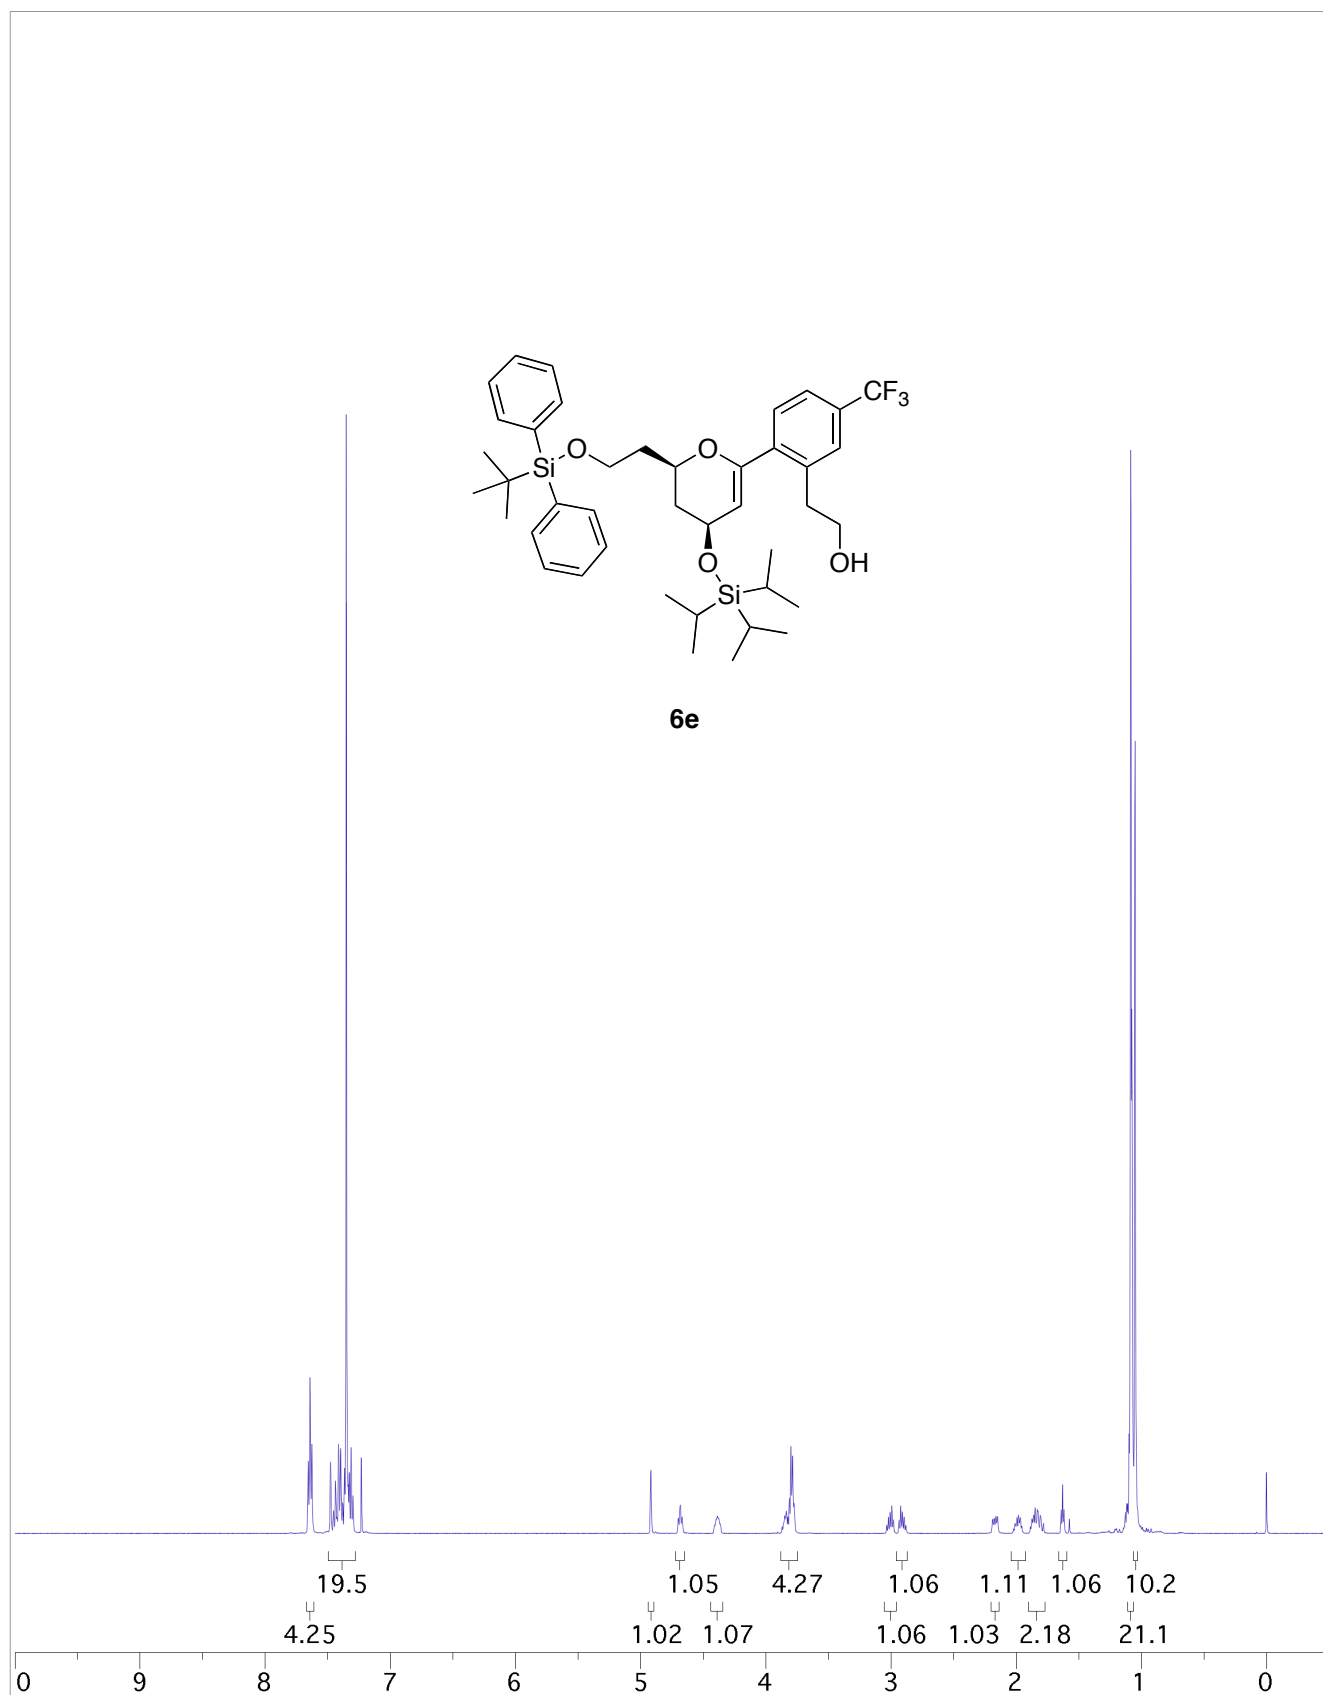

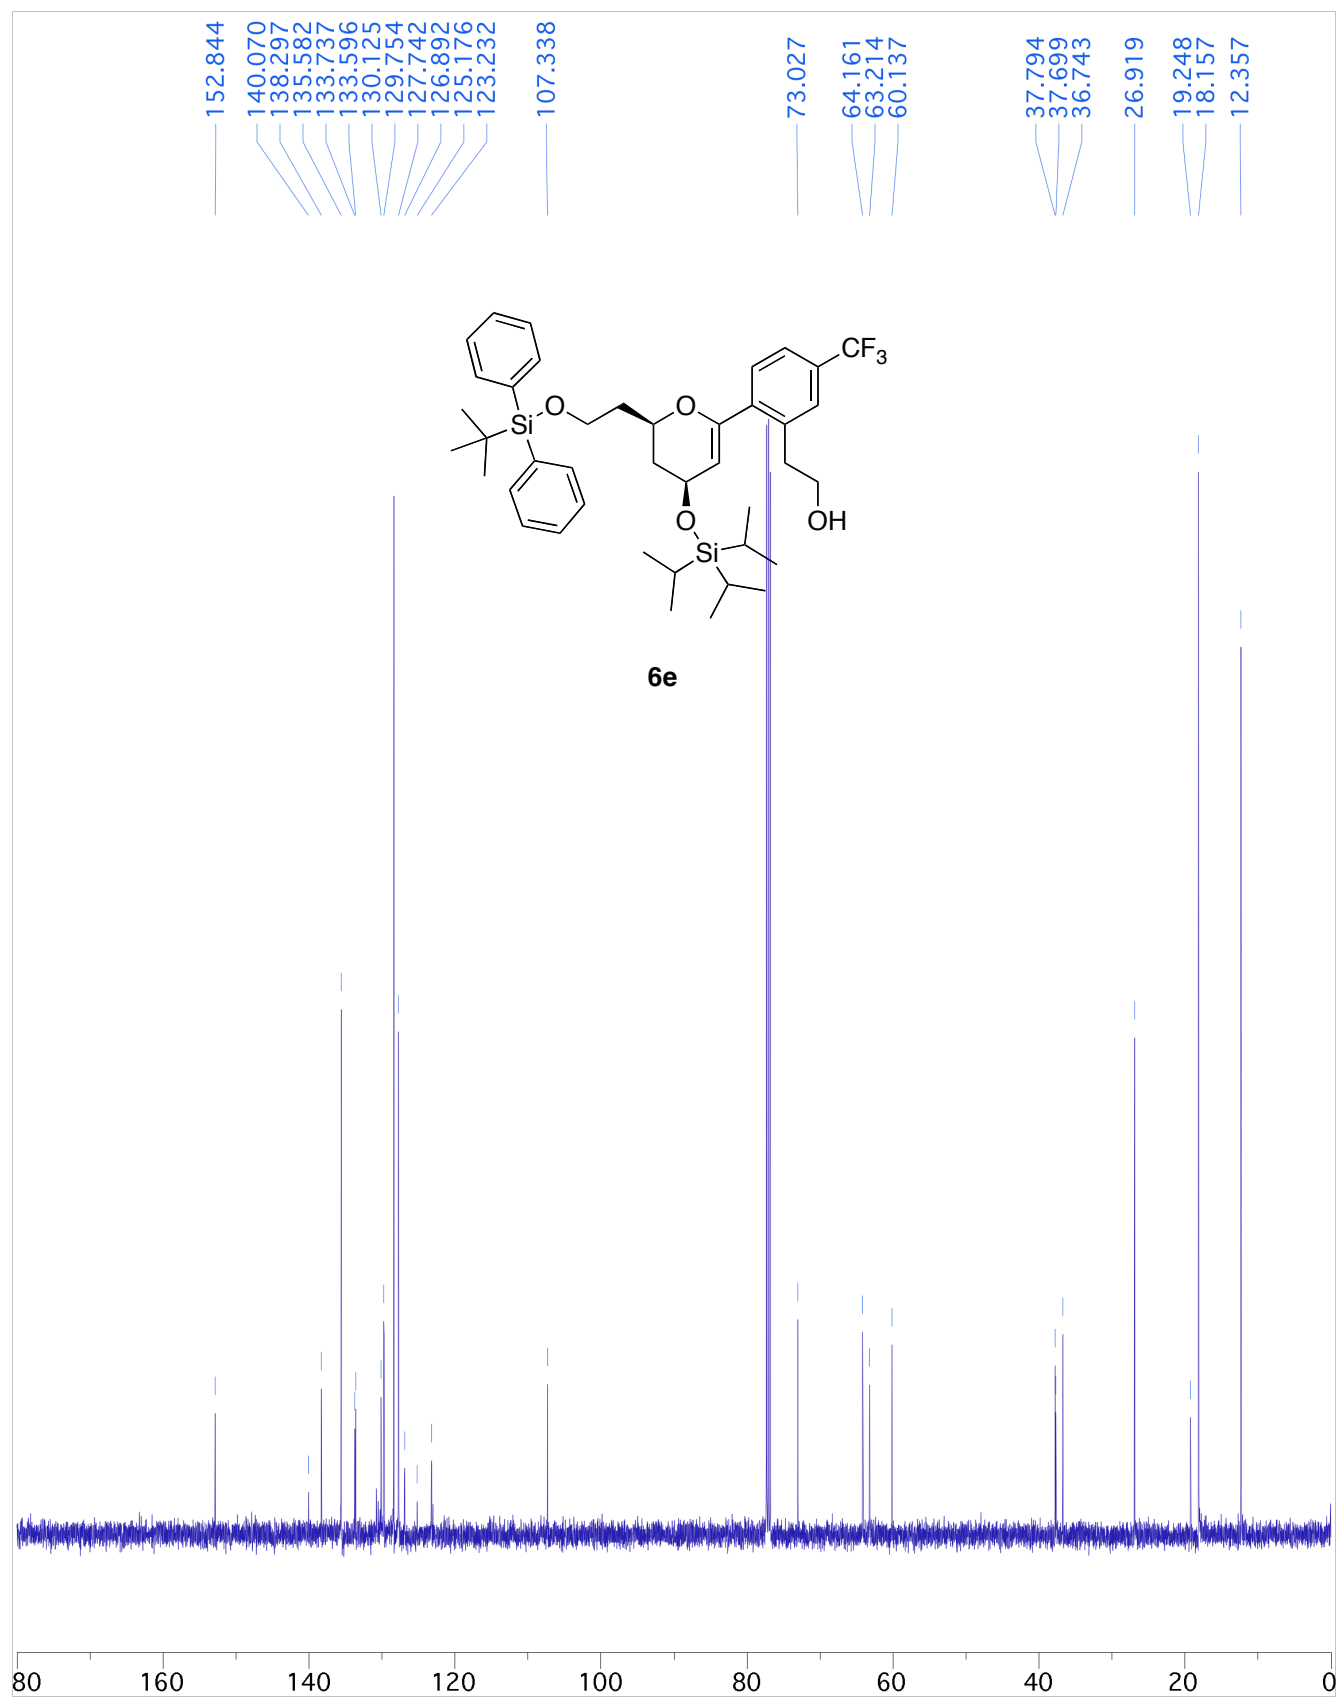

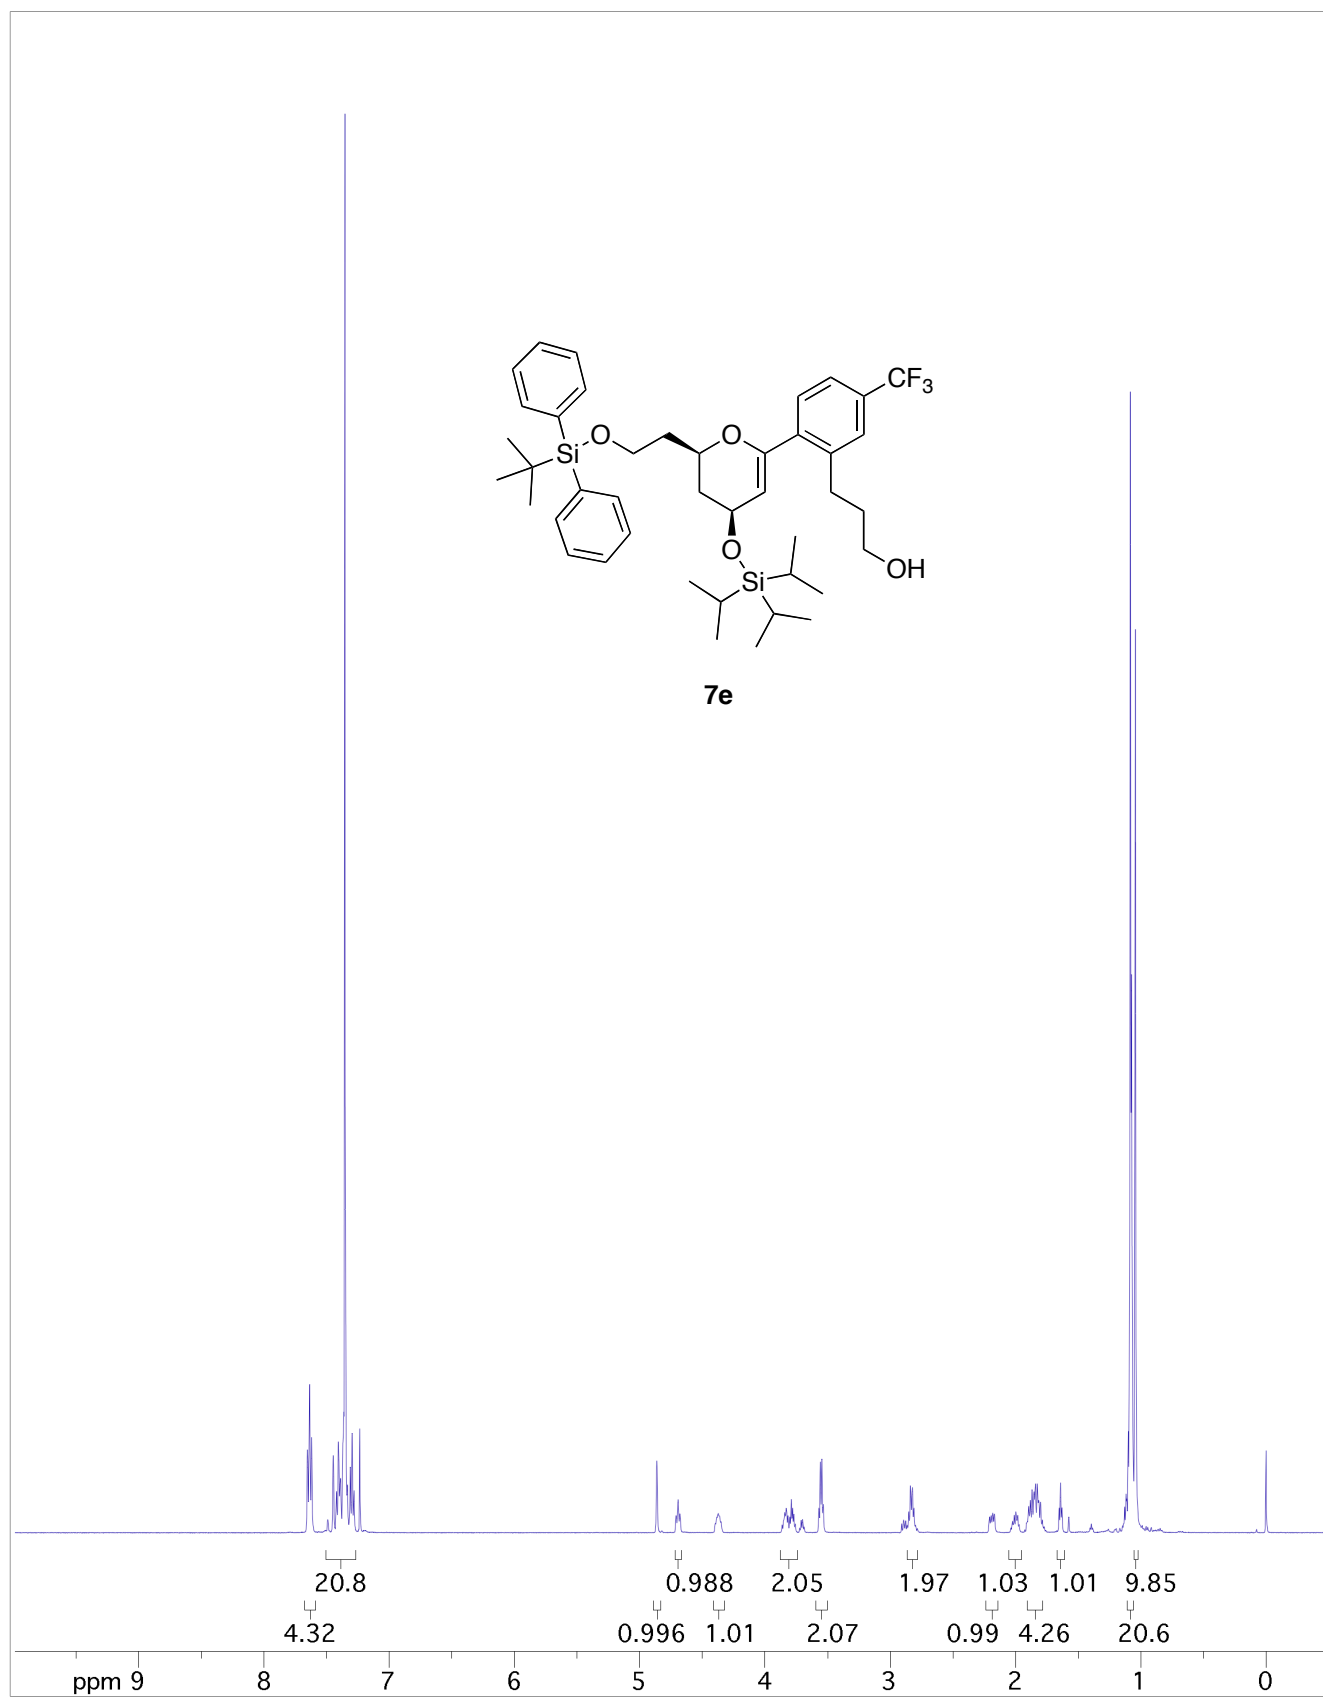

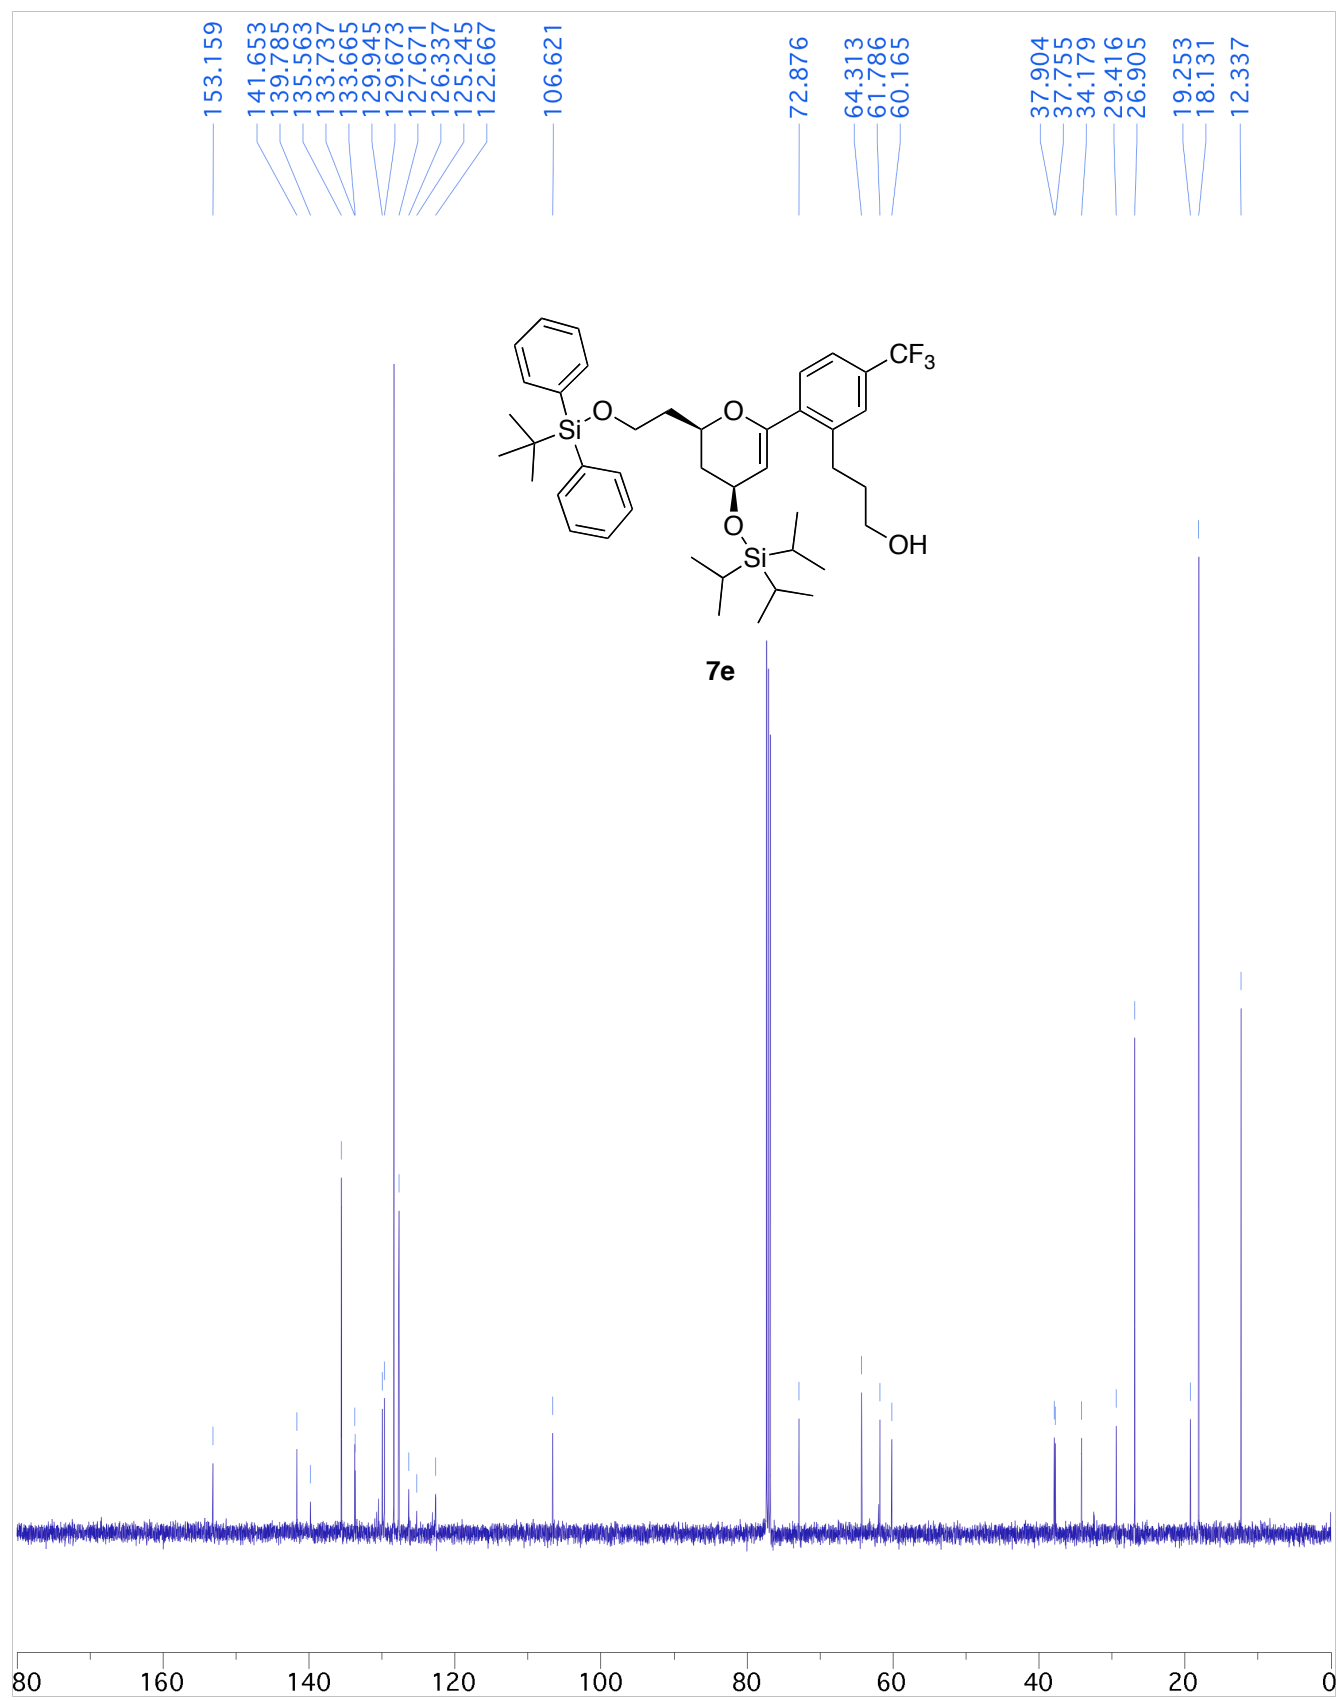

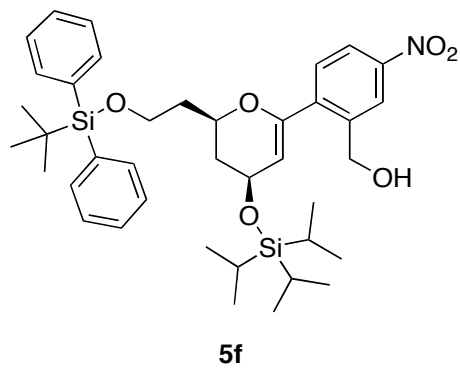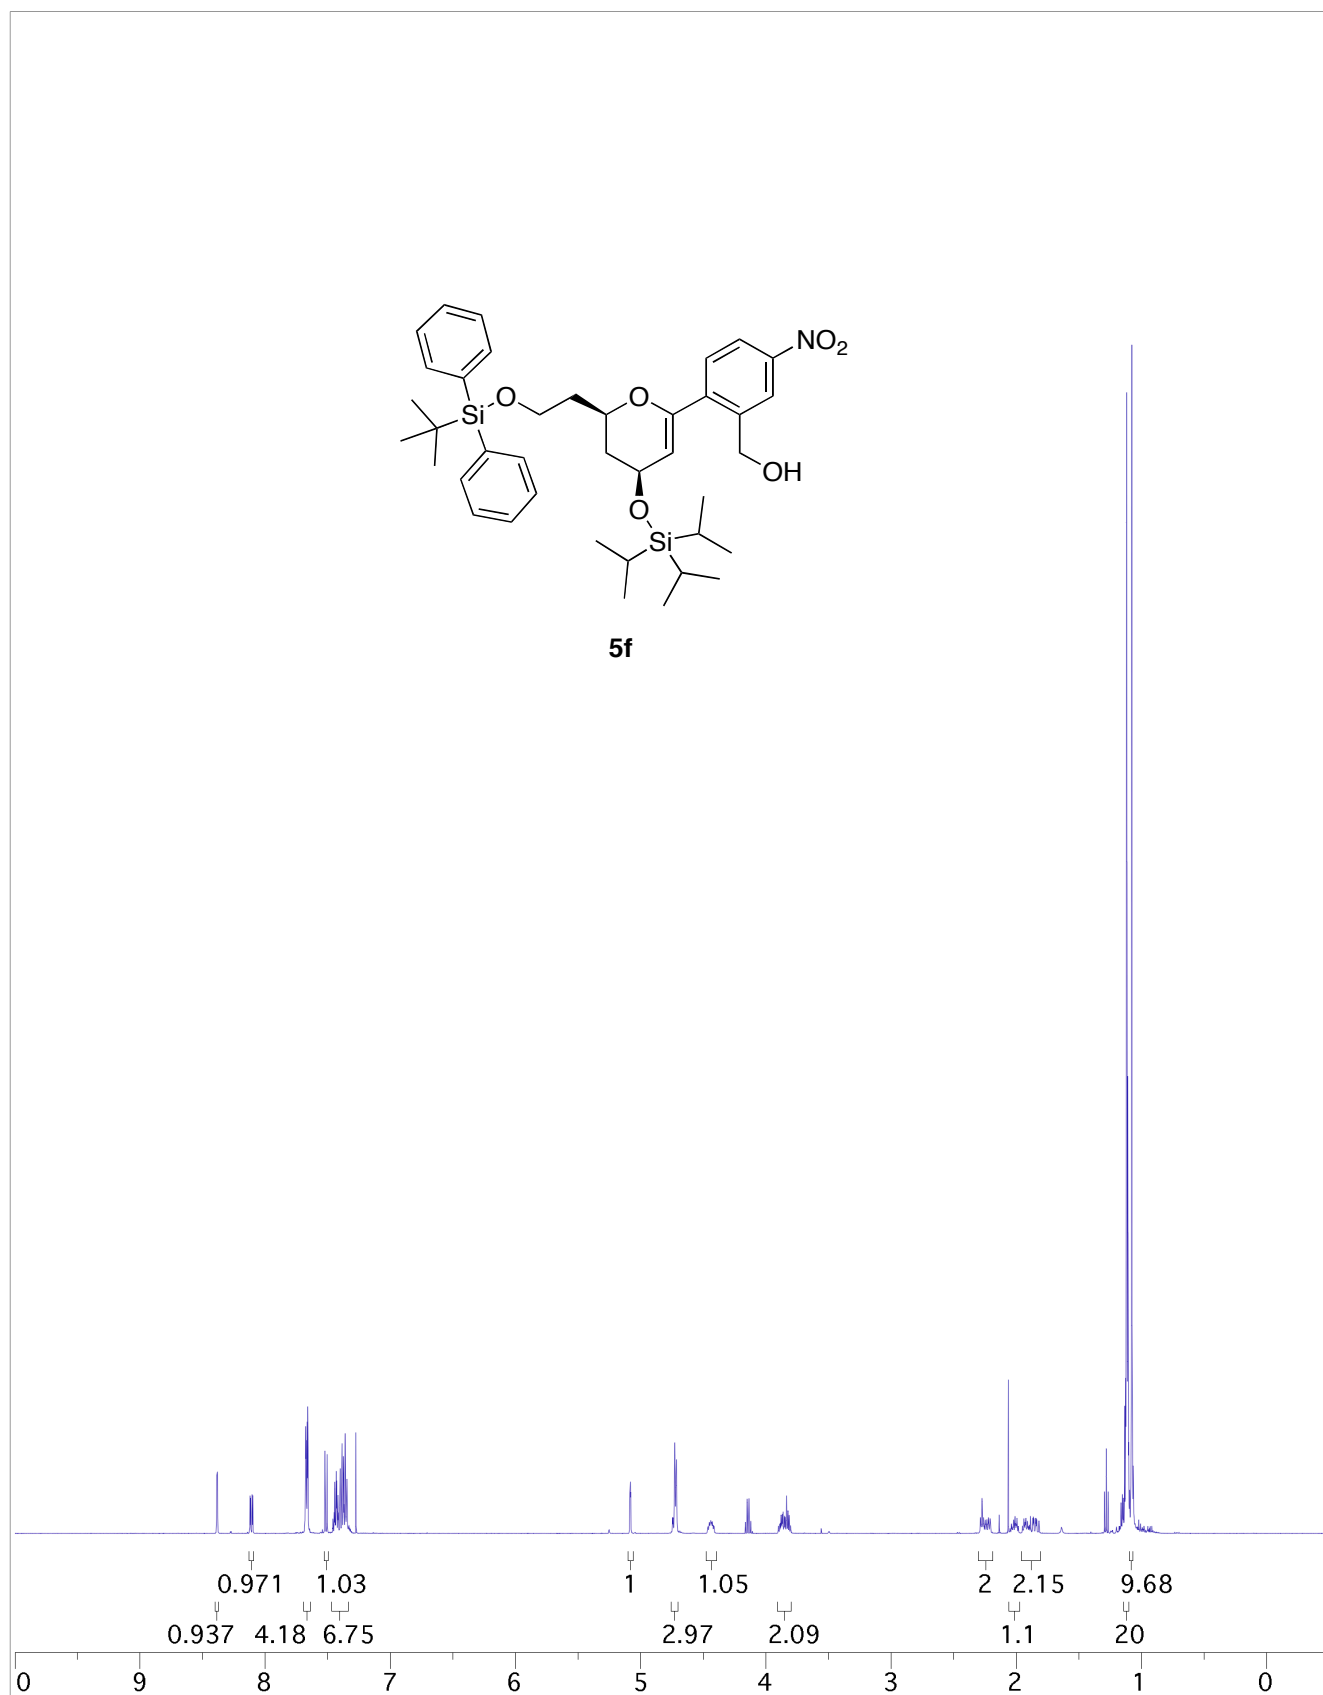



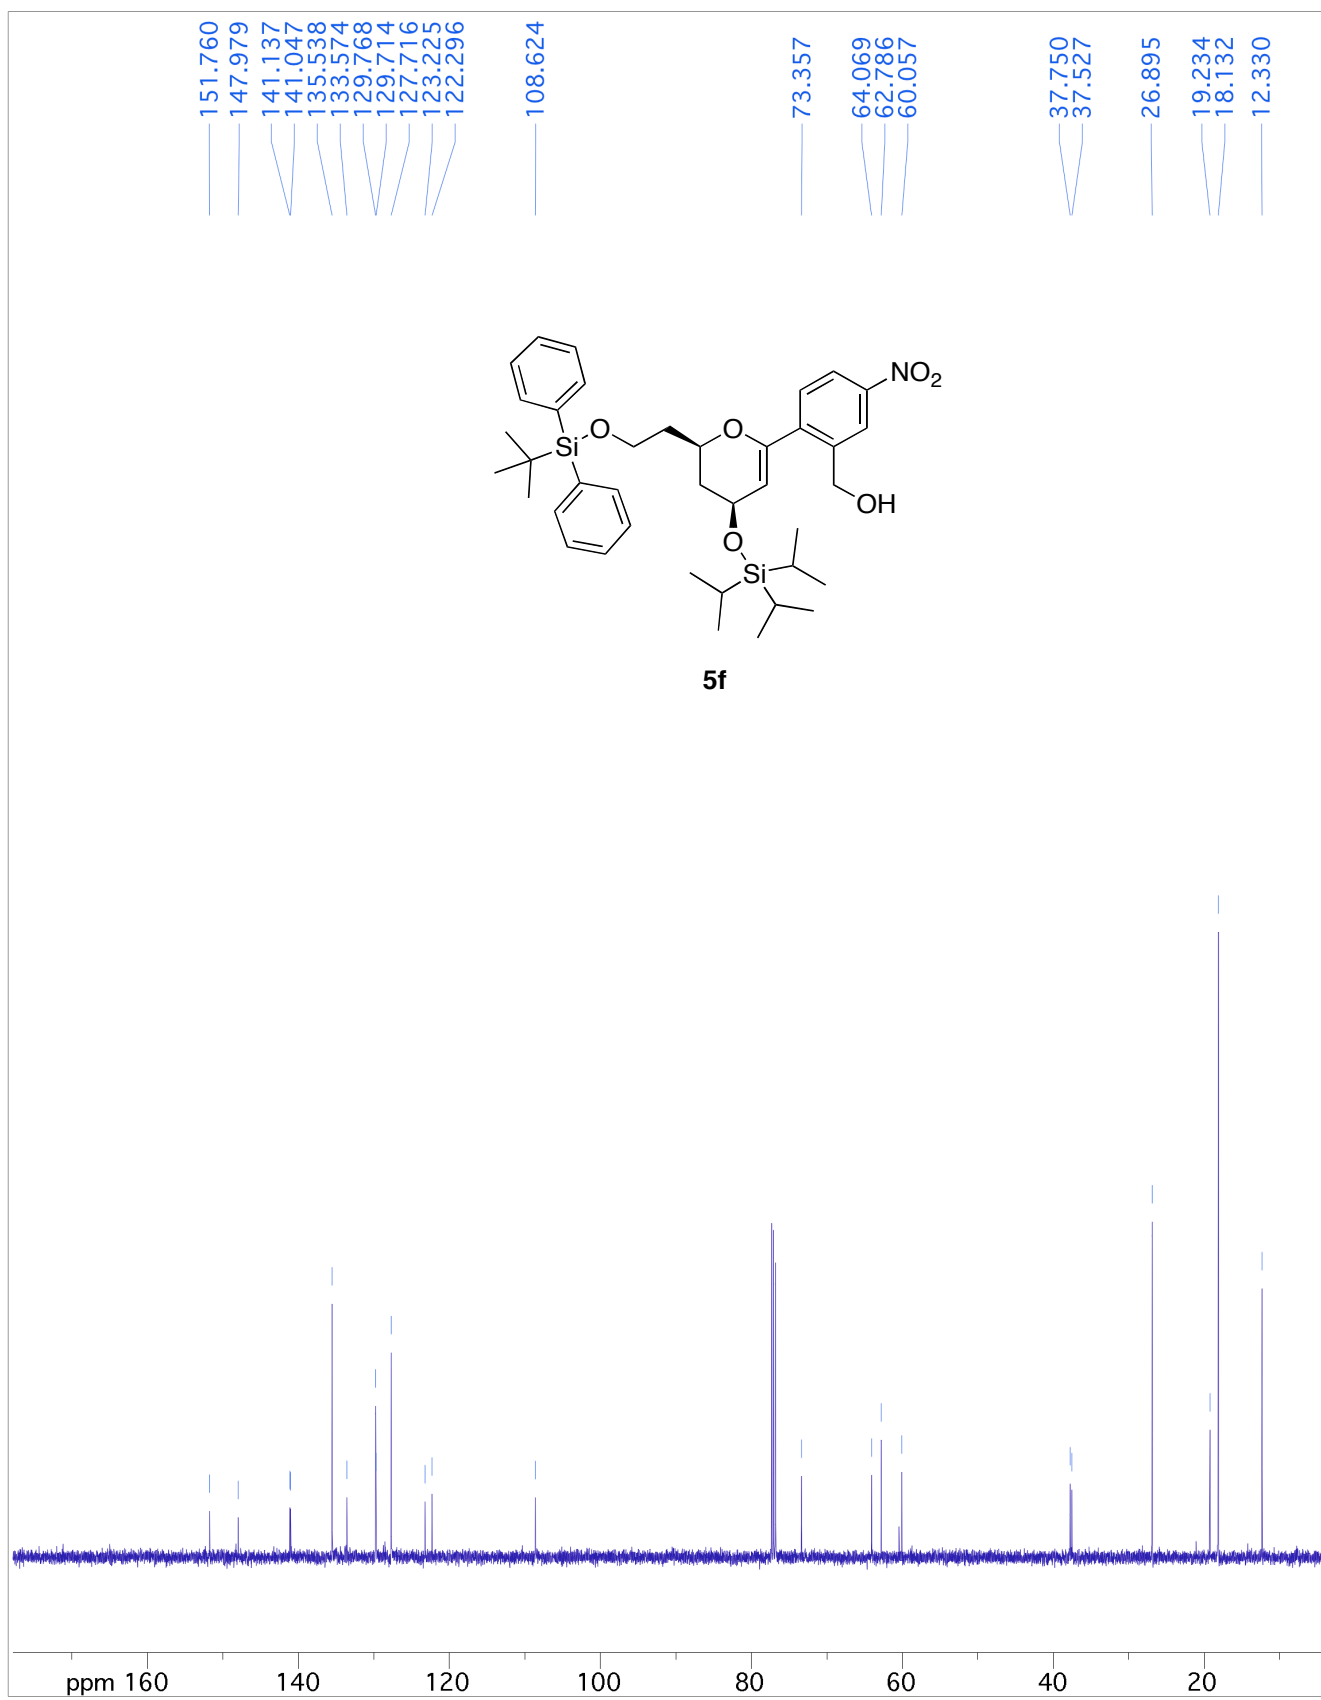

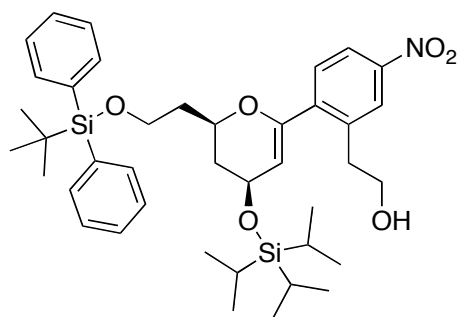**6f**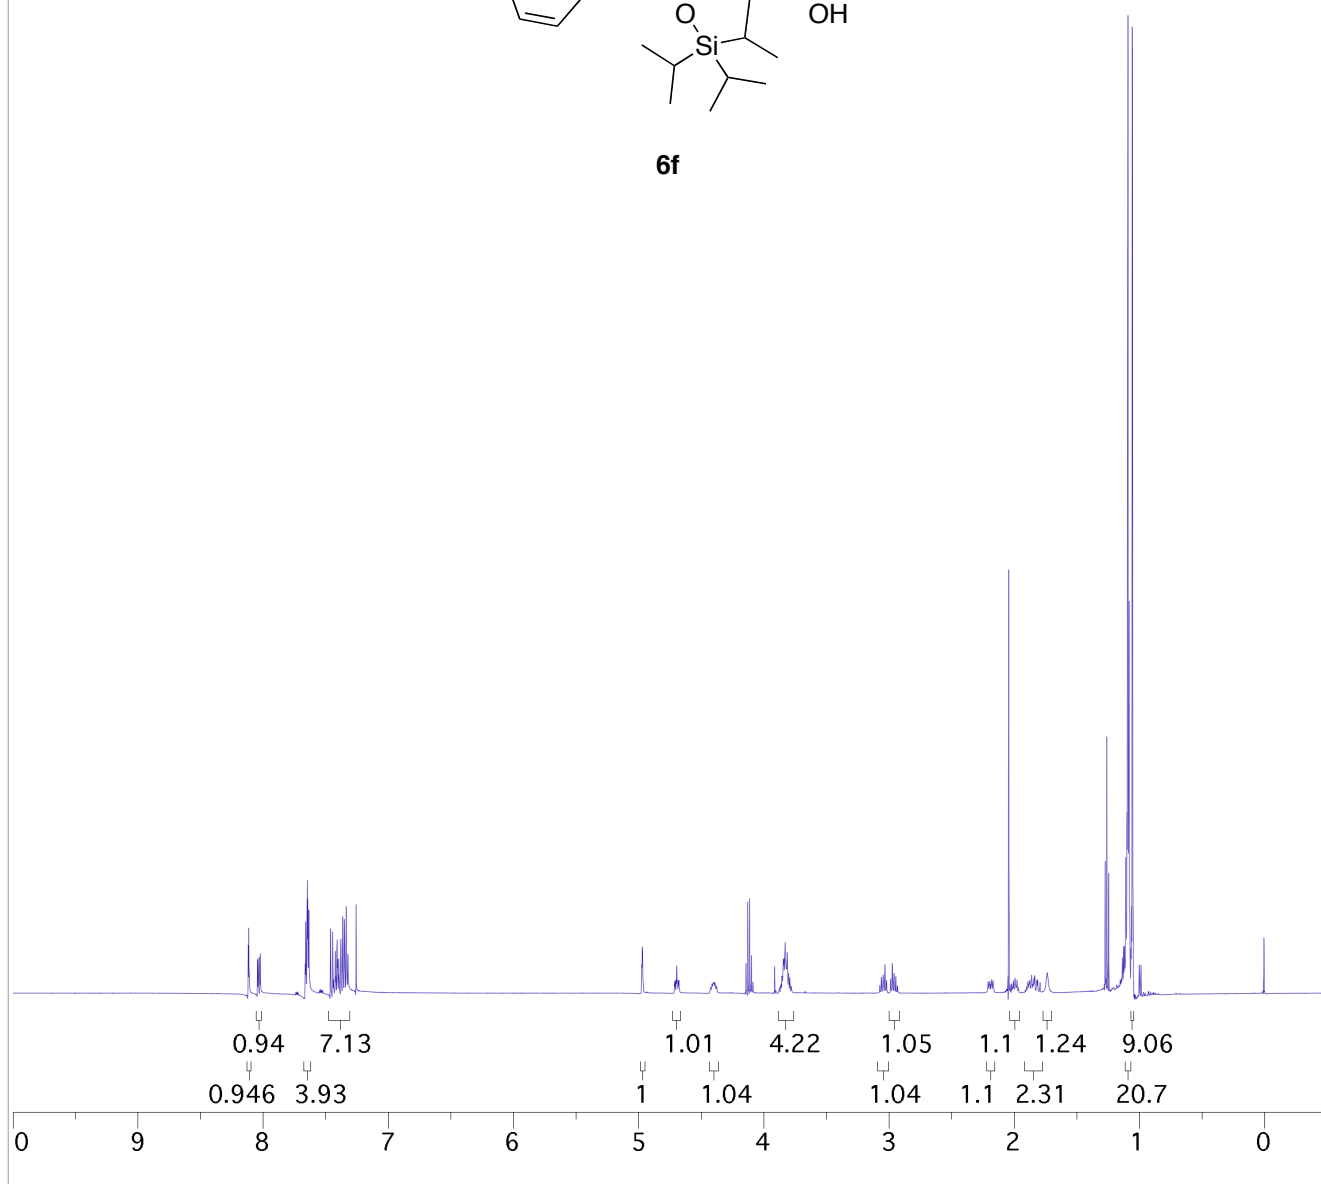

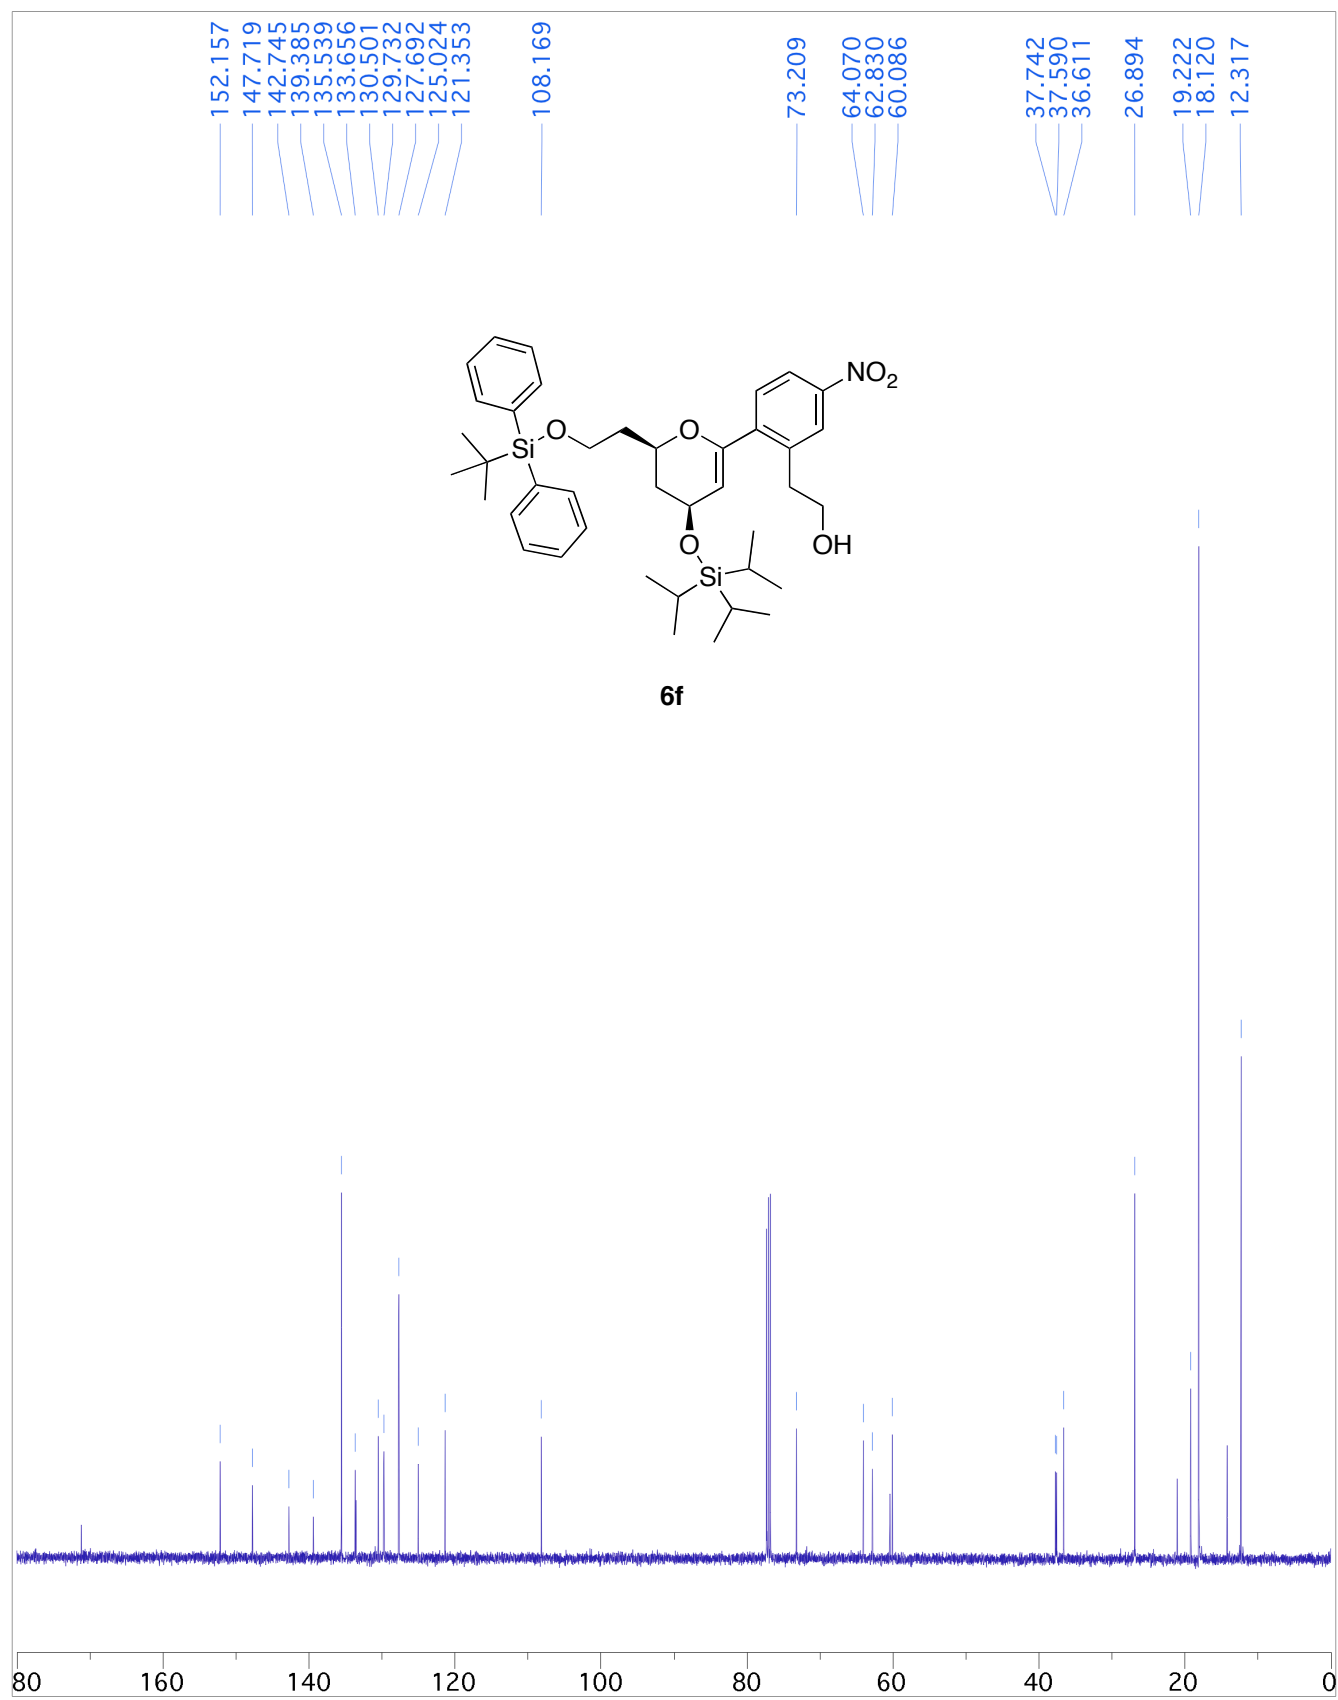

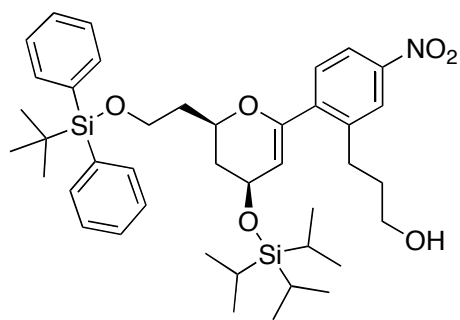

7f

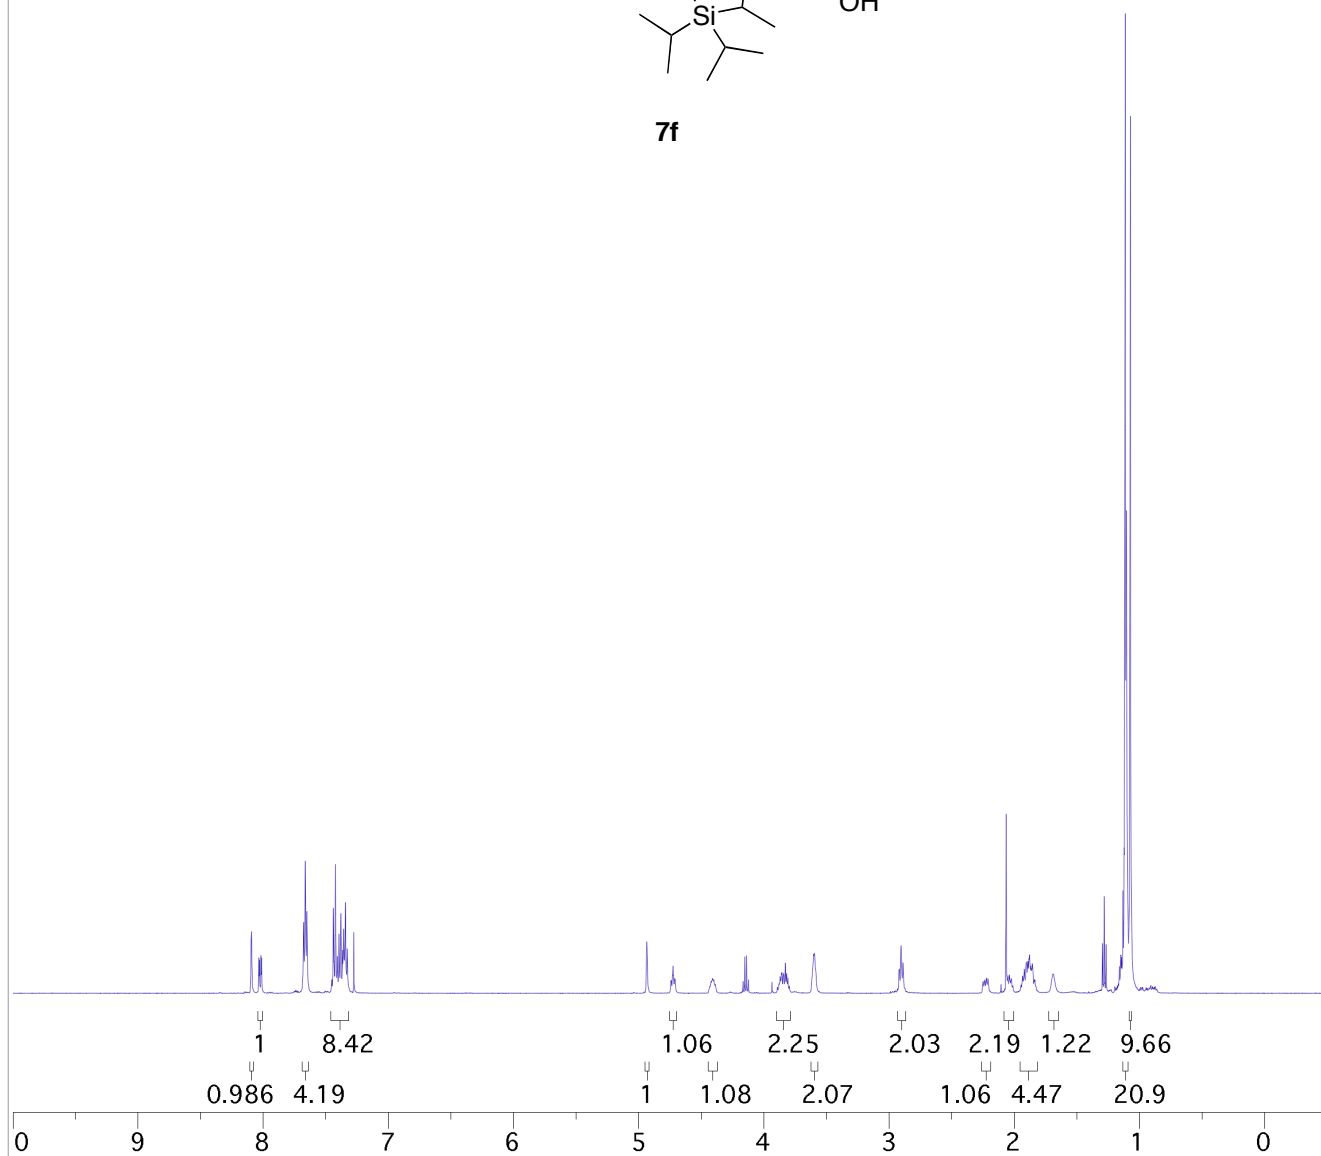



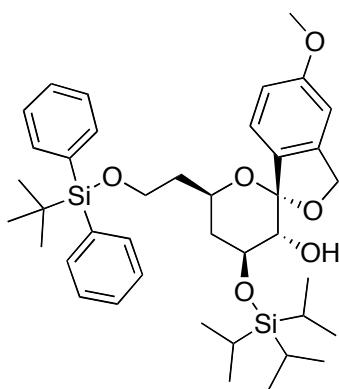**11a**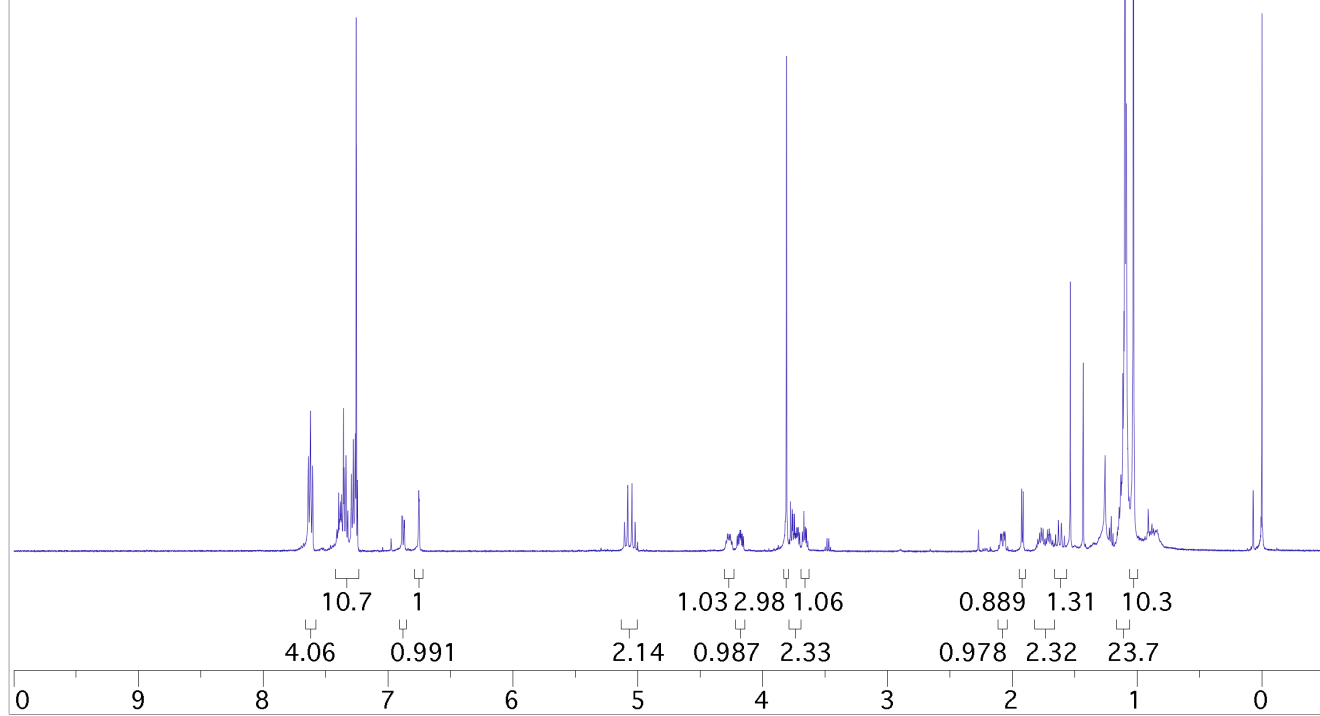

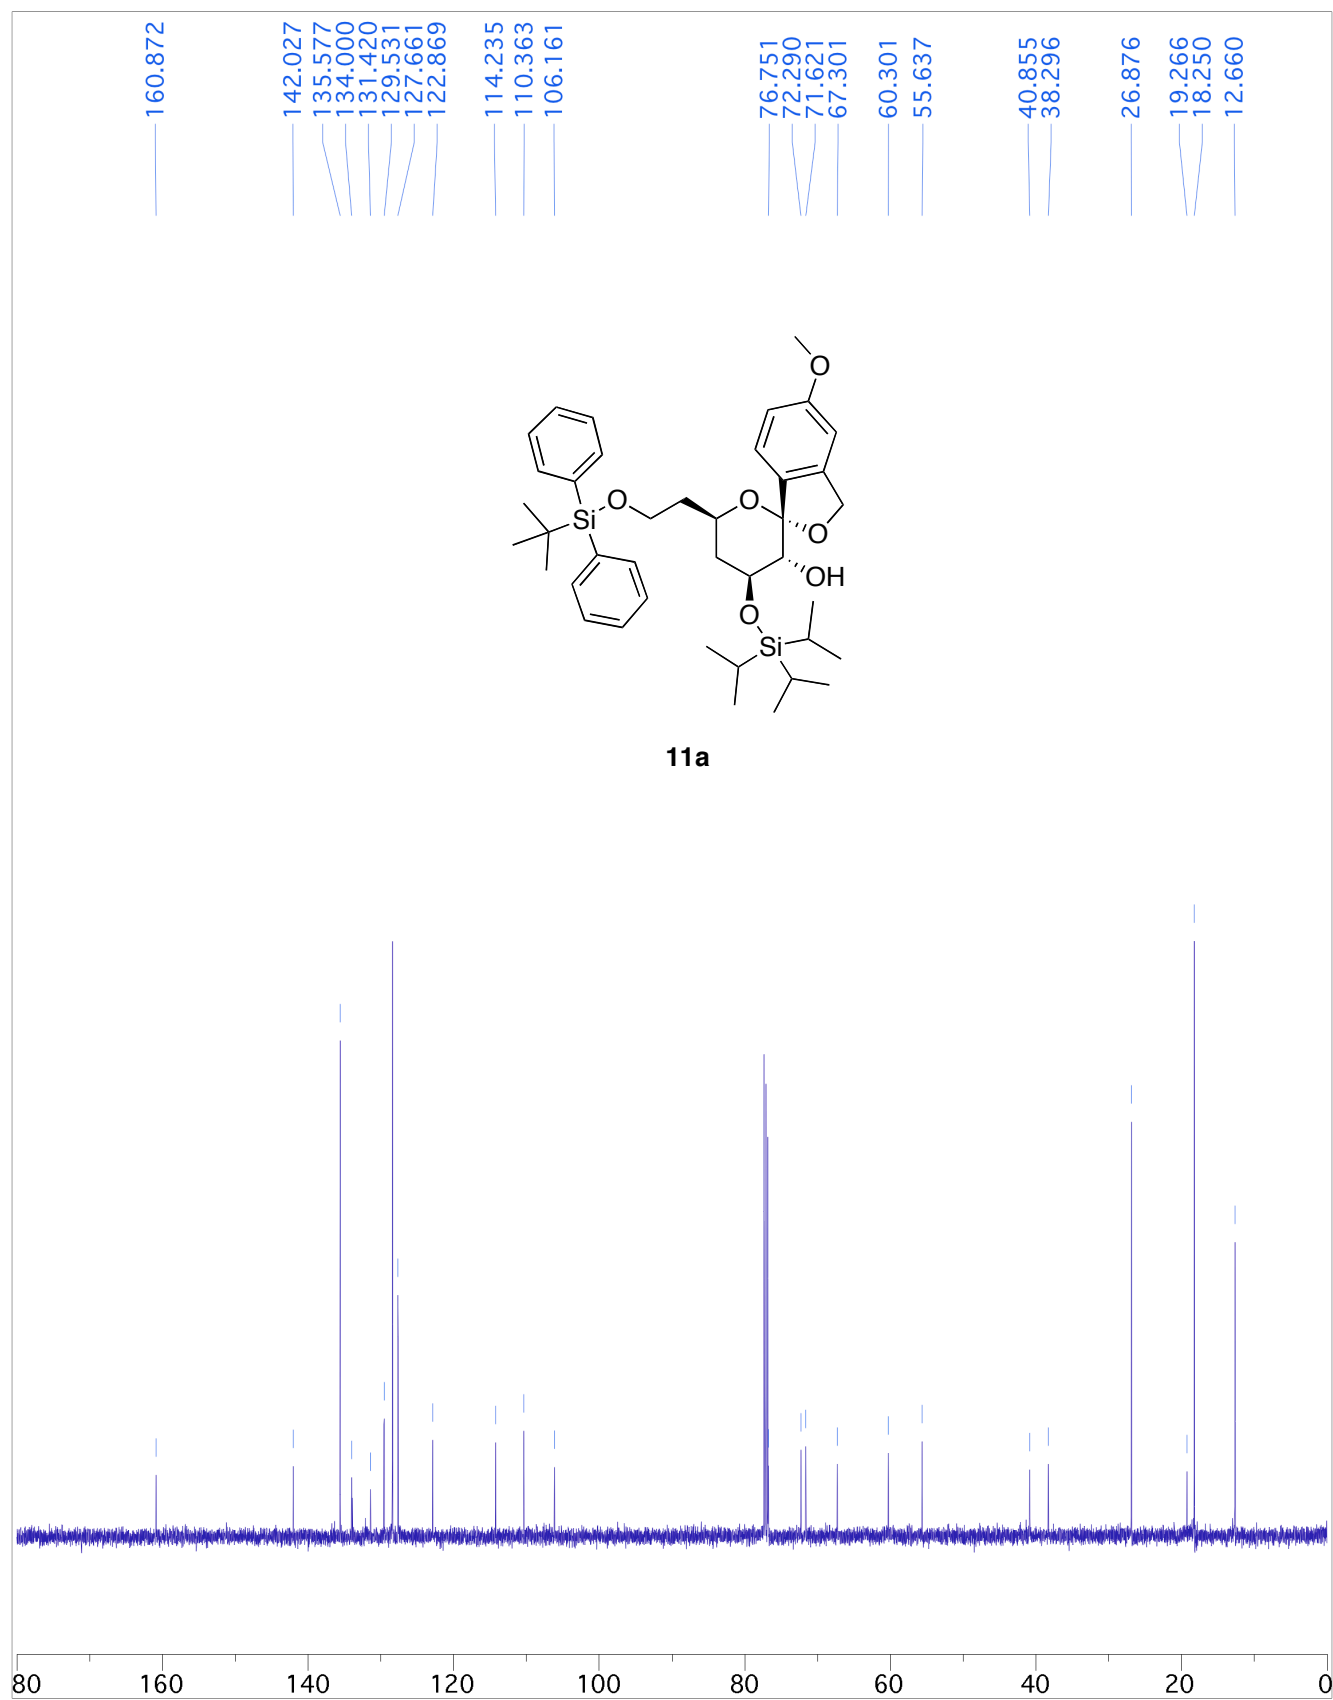

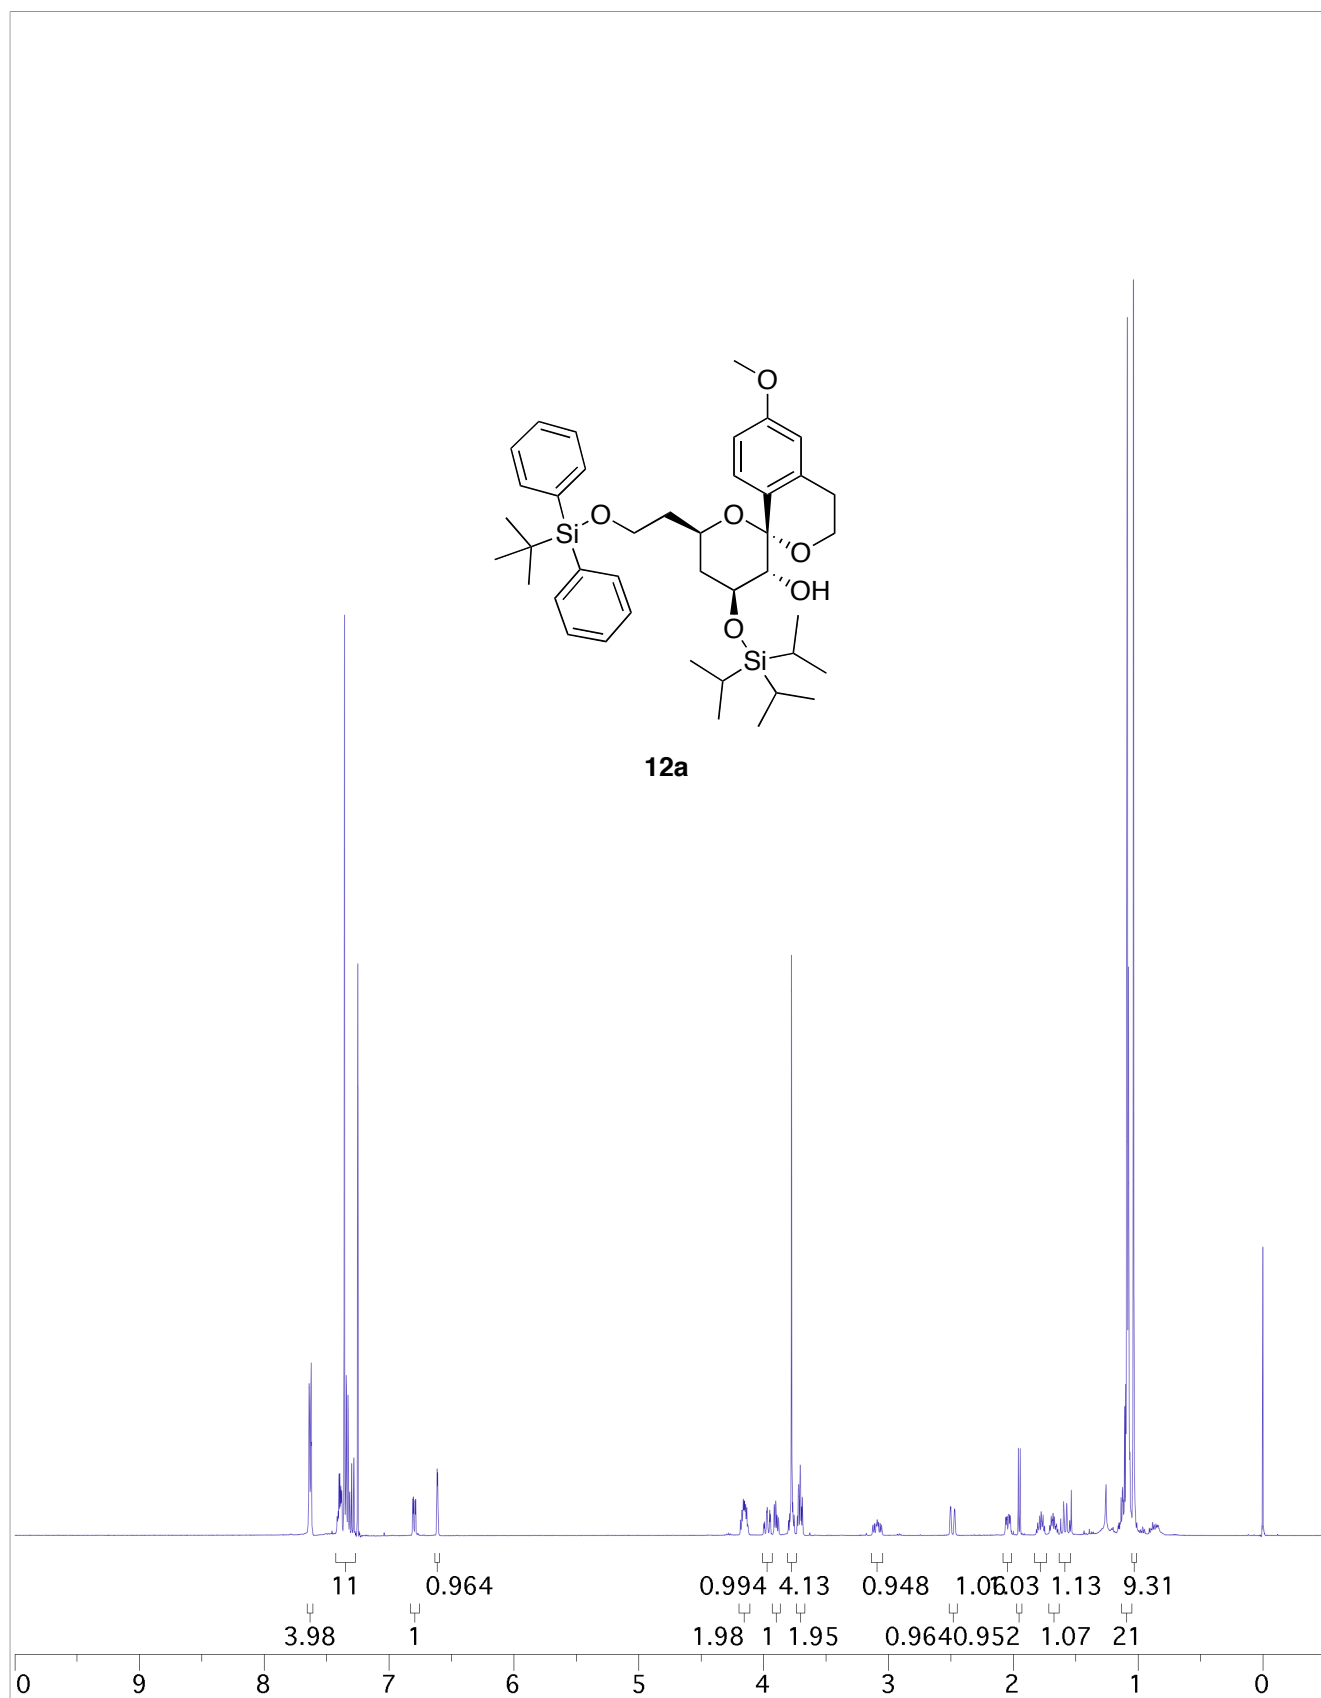



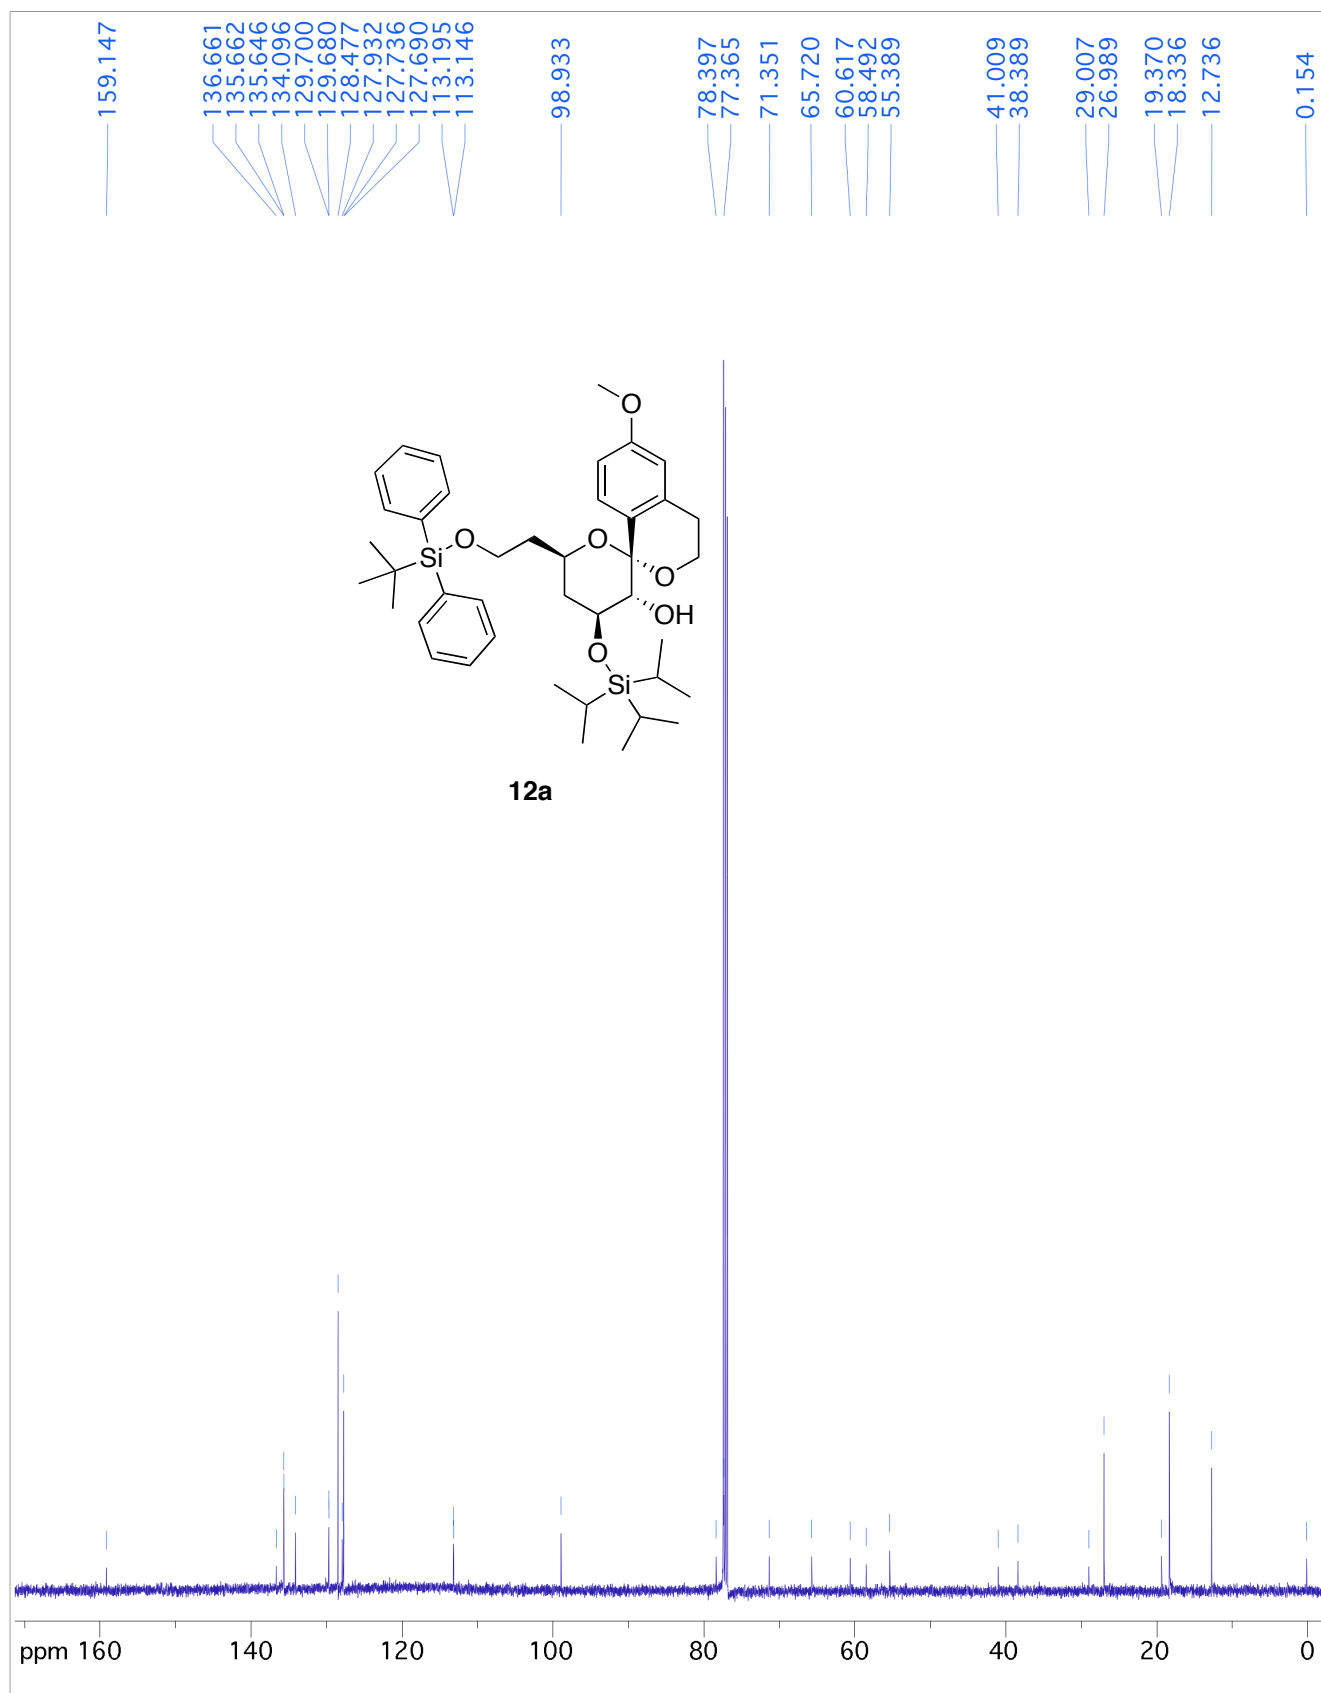



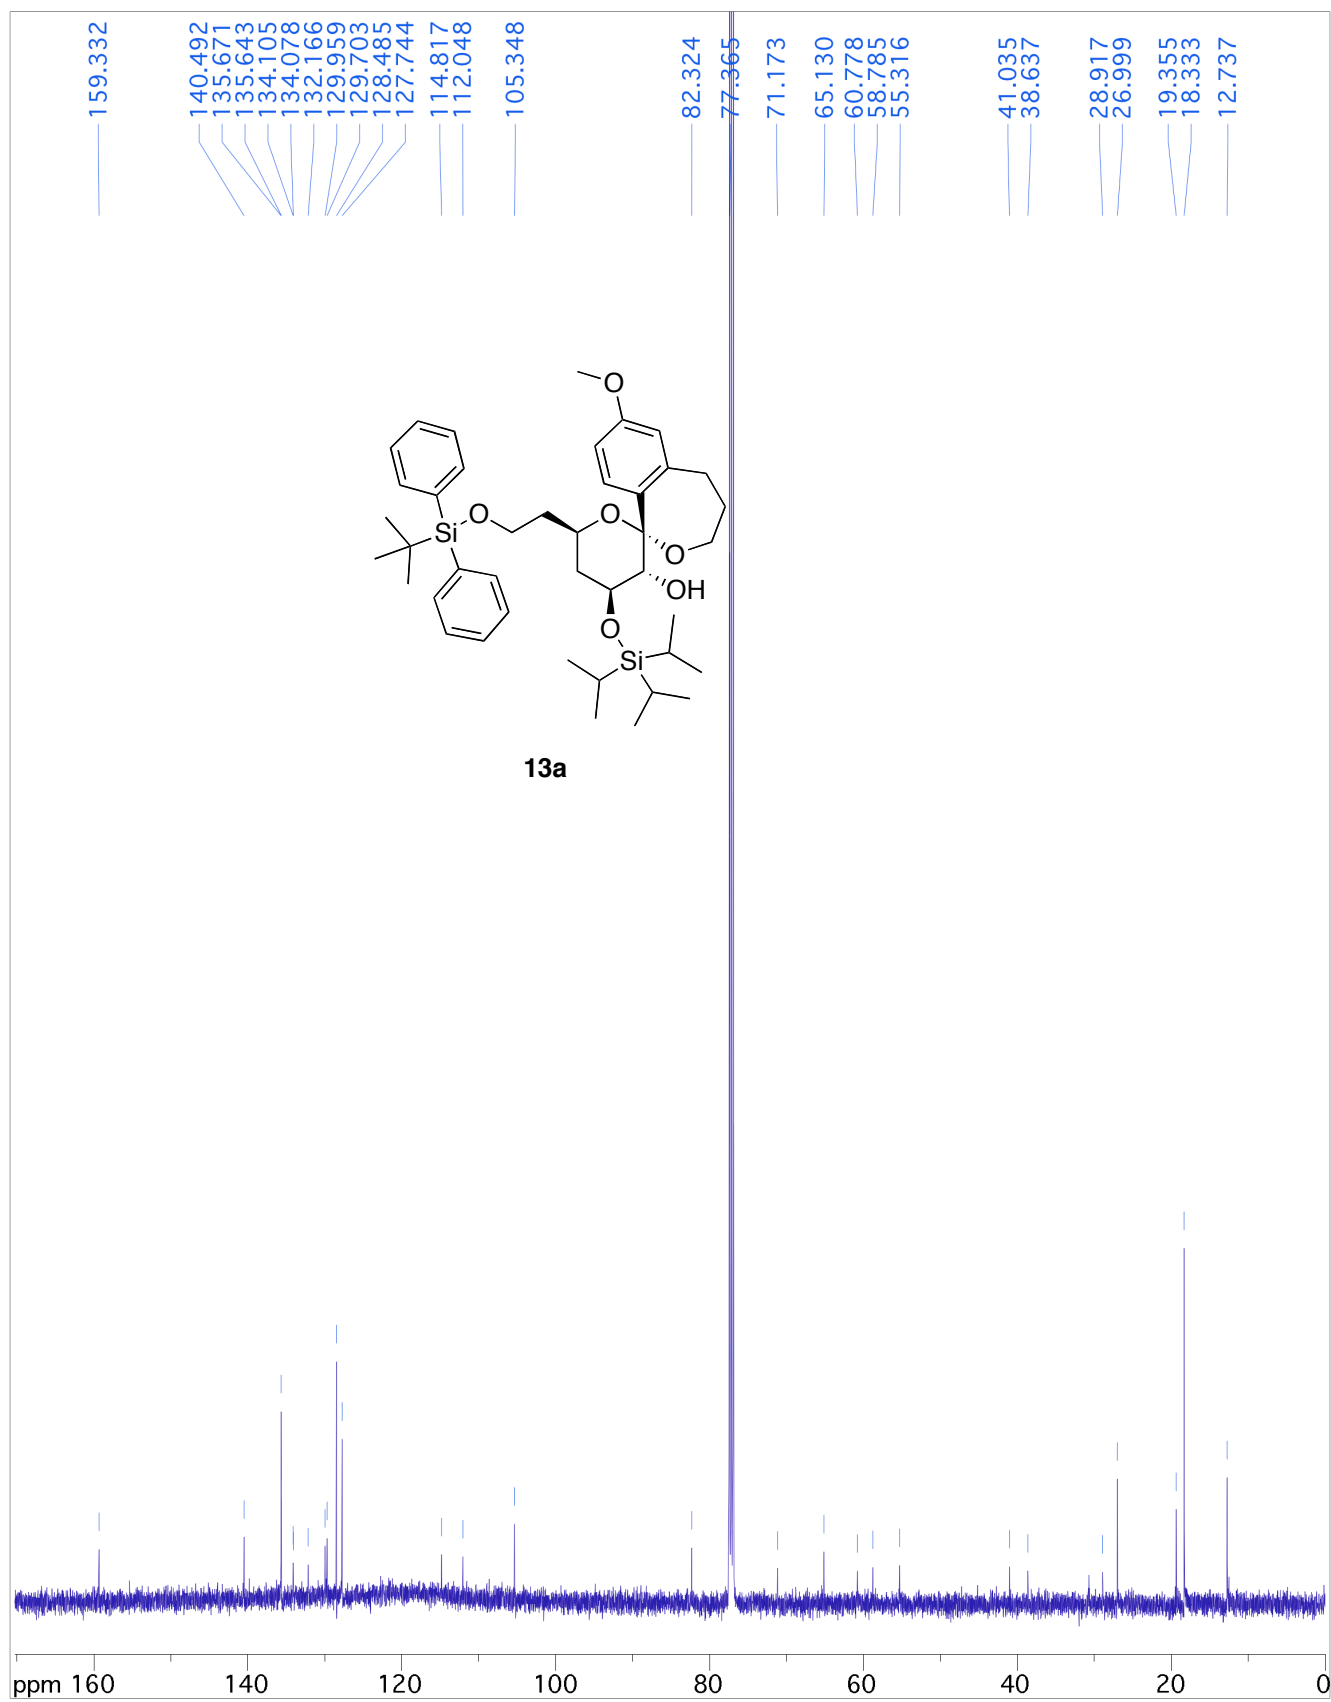

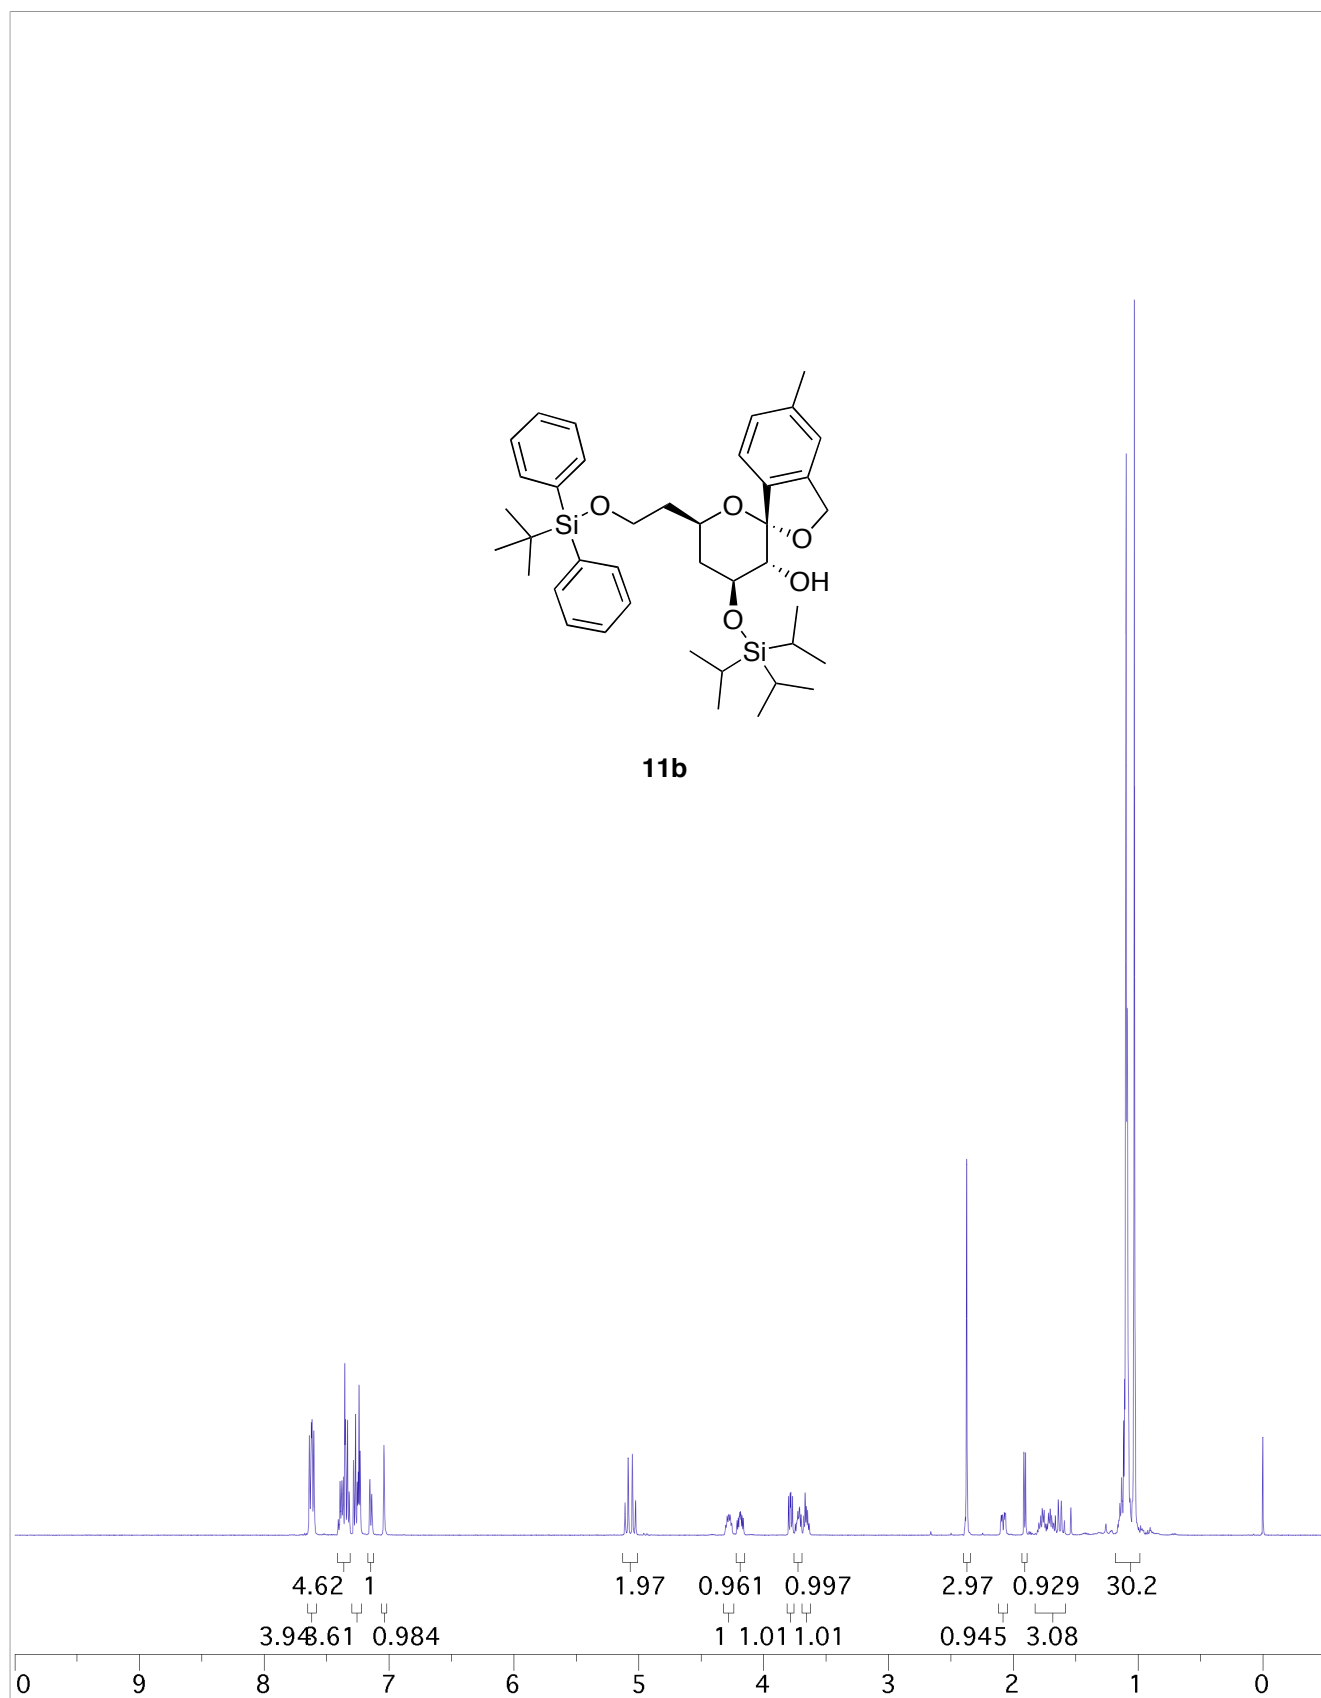

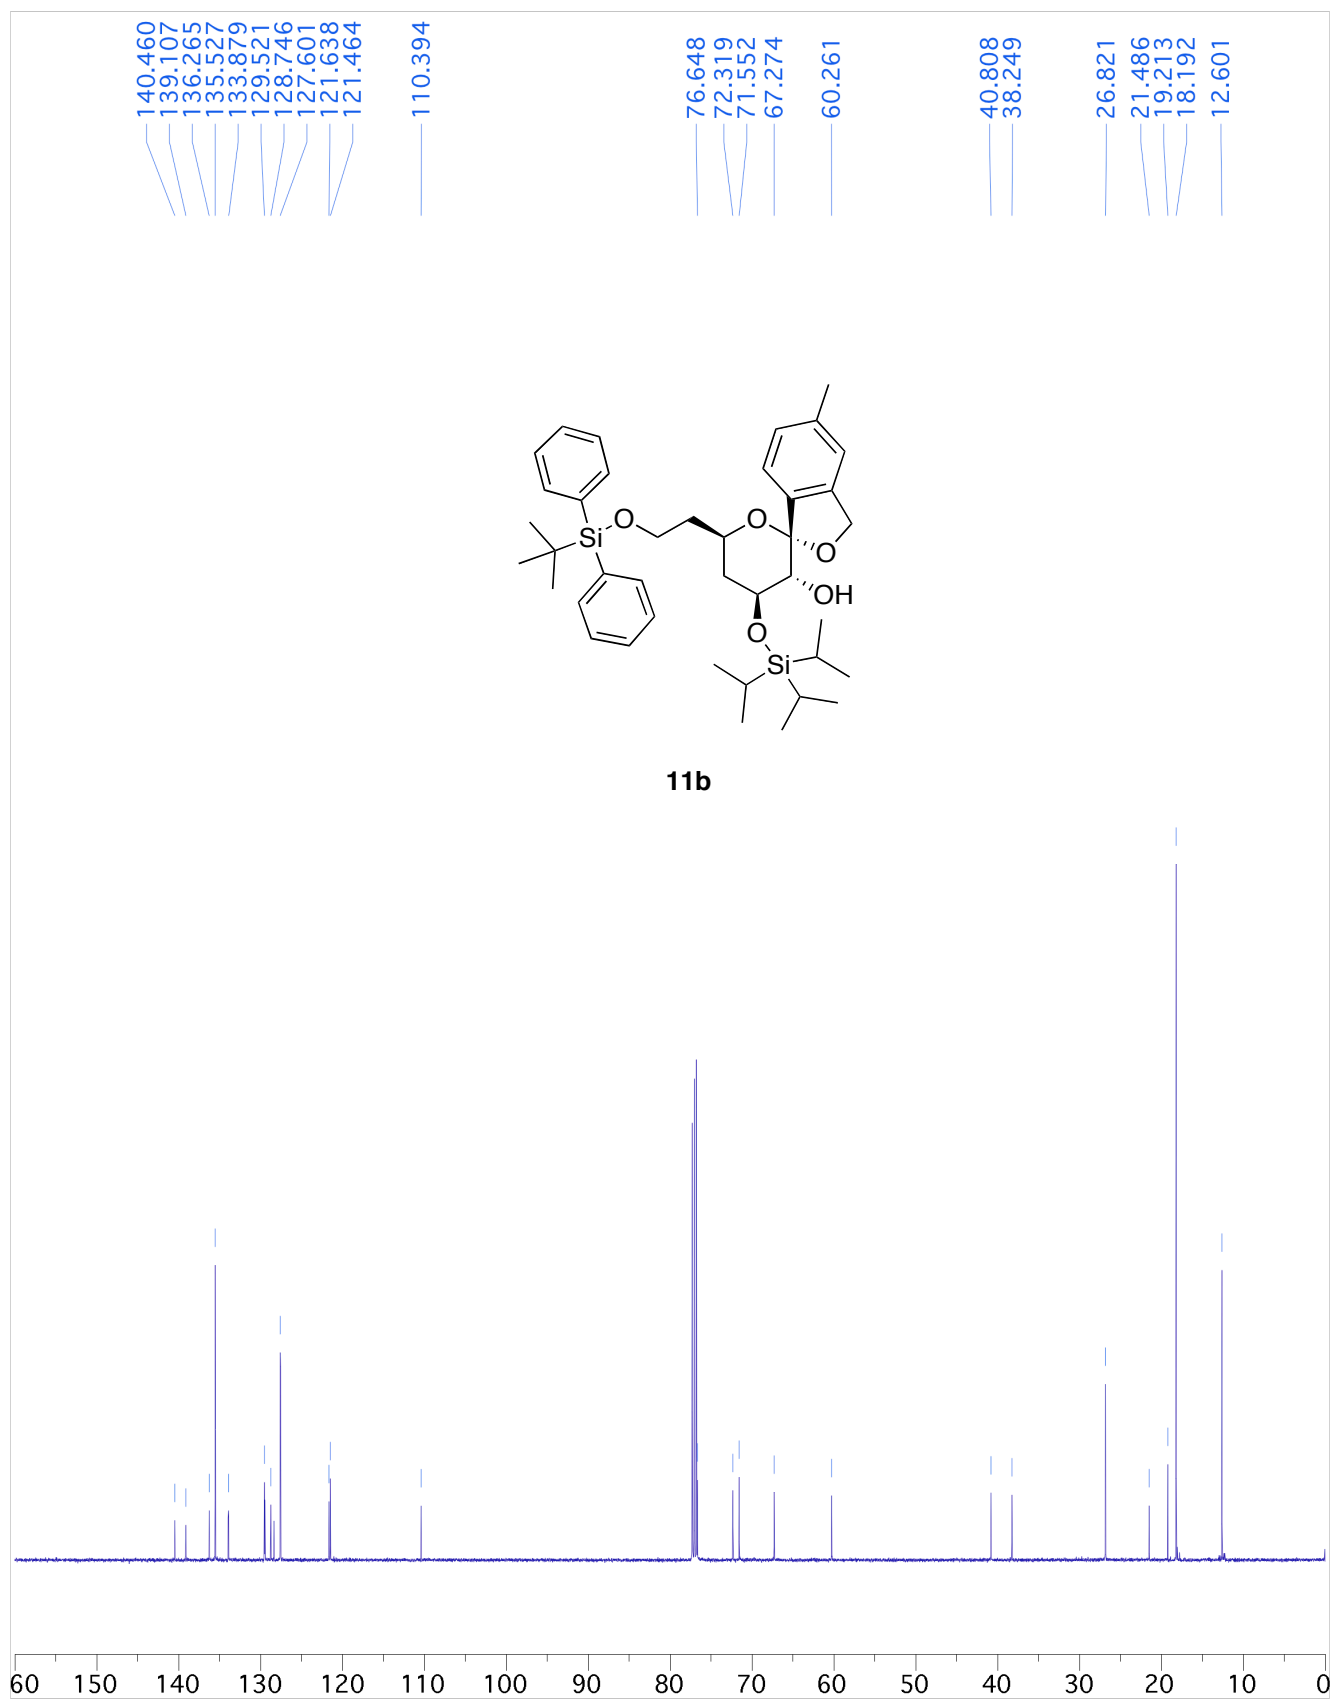



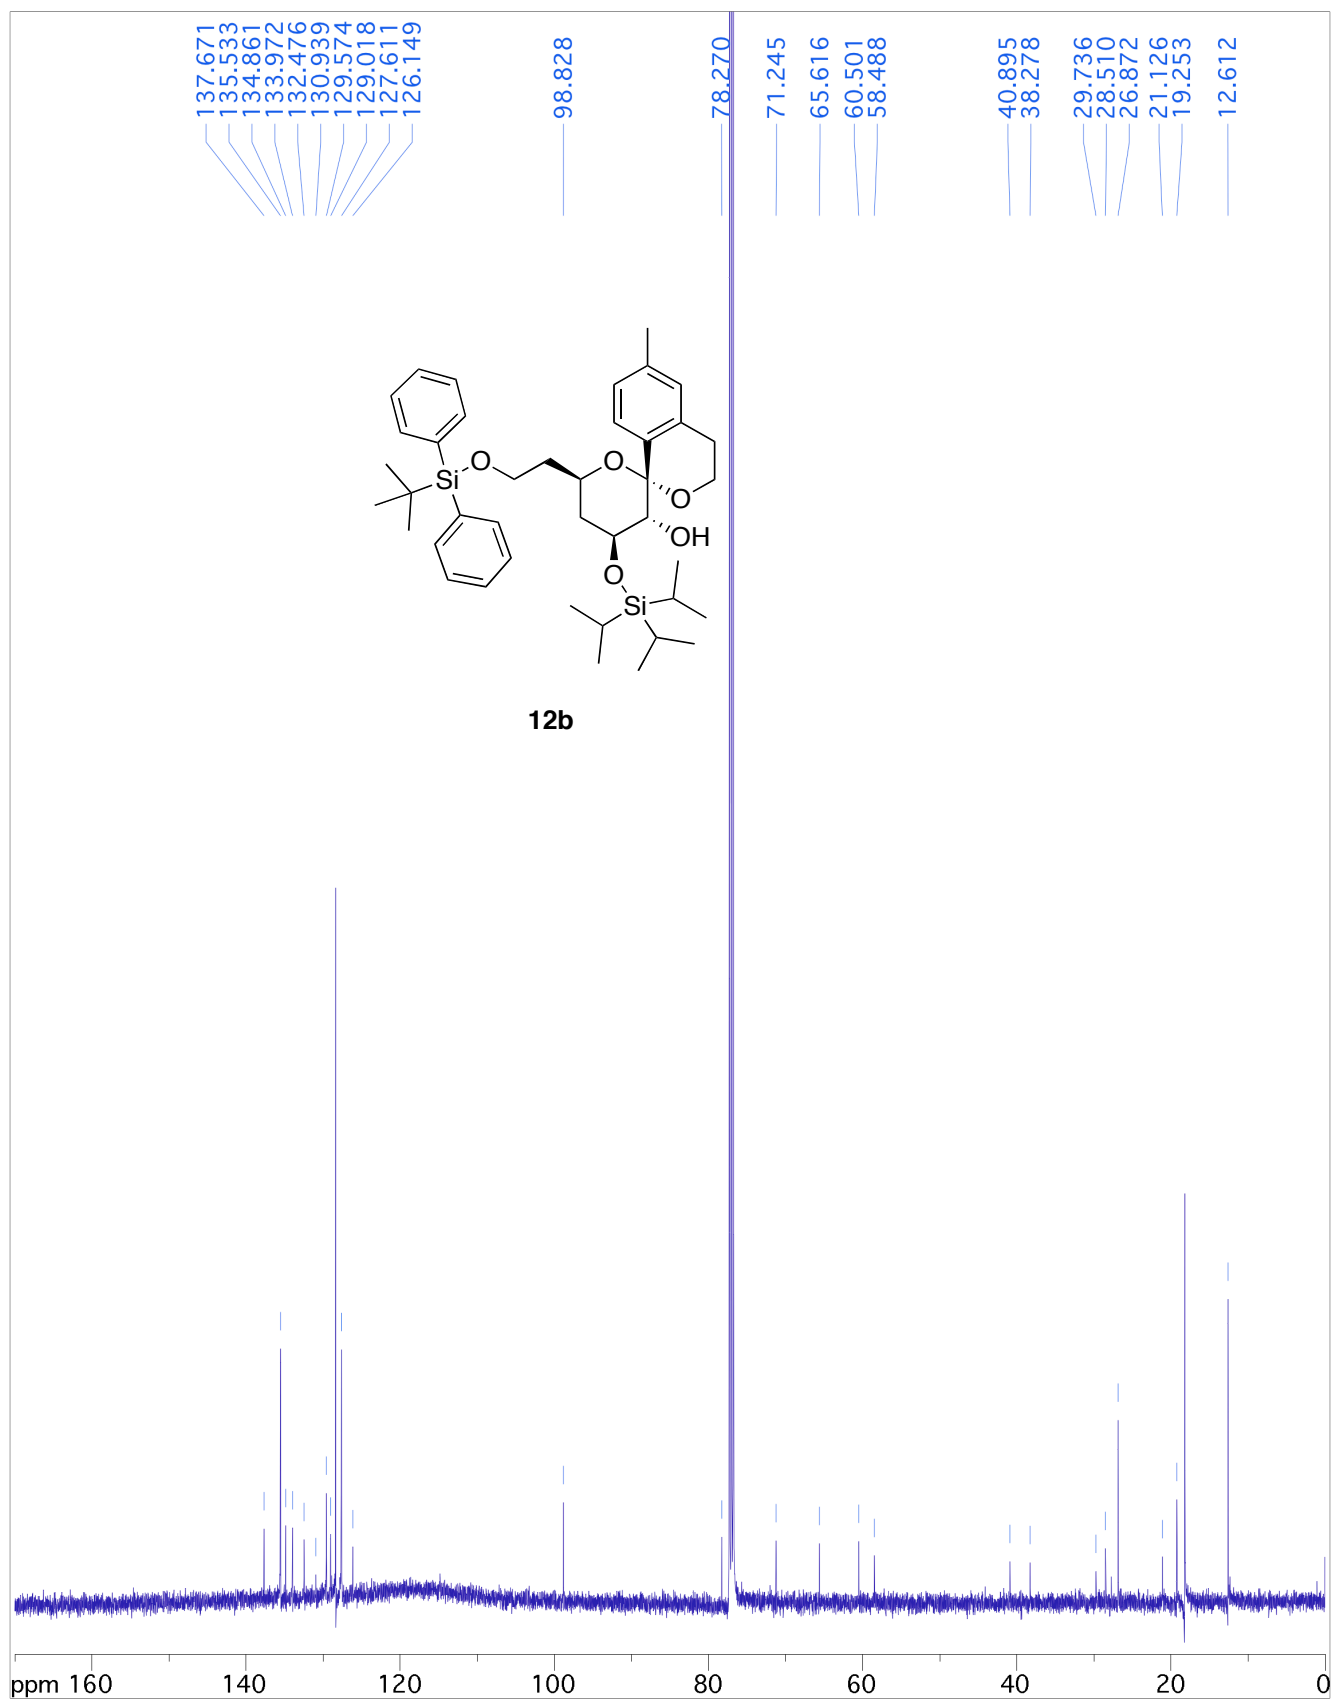

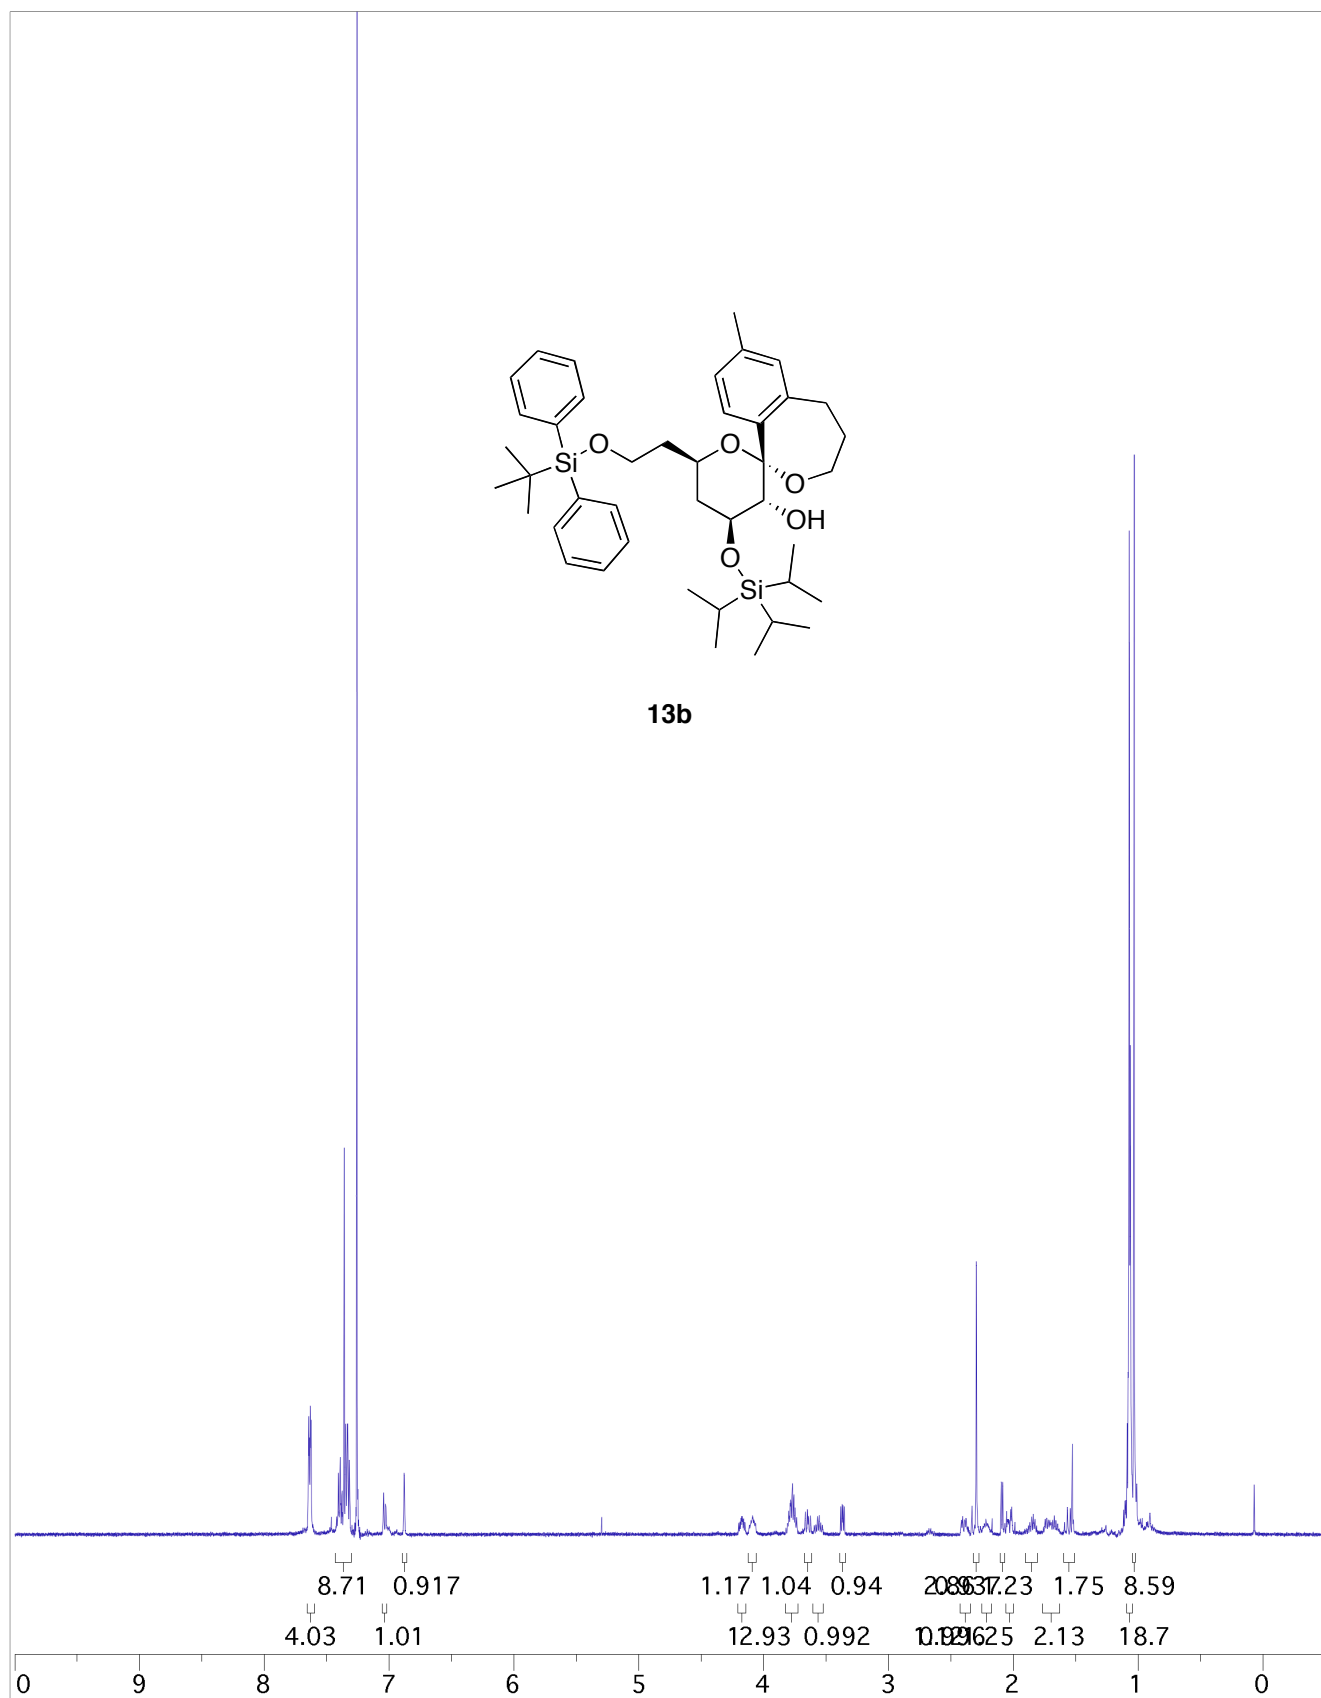





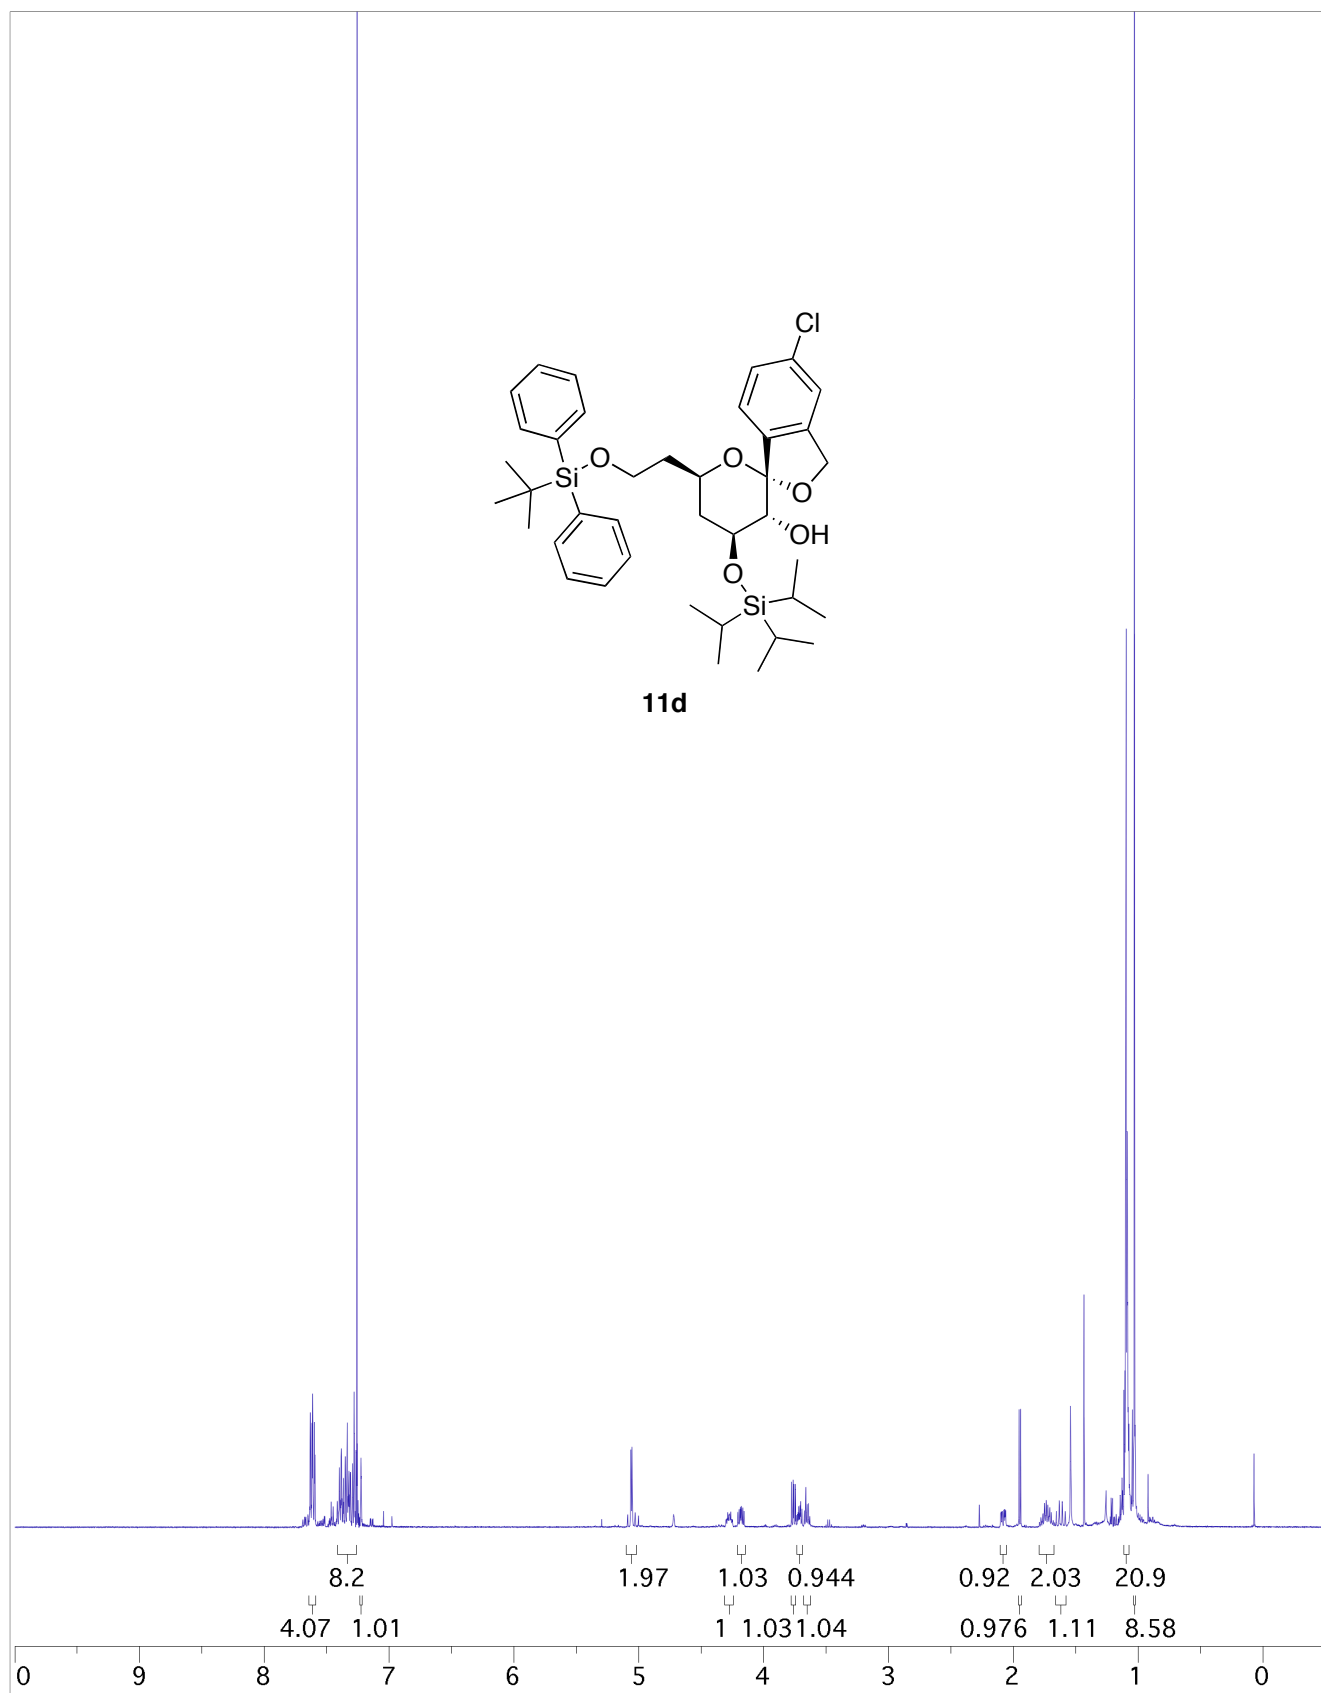

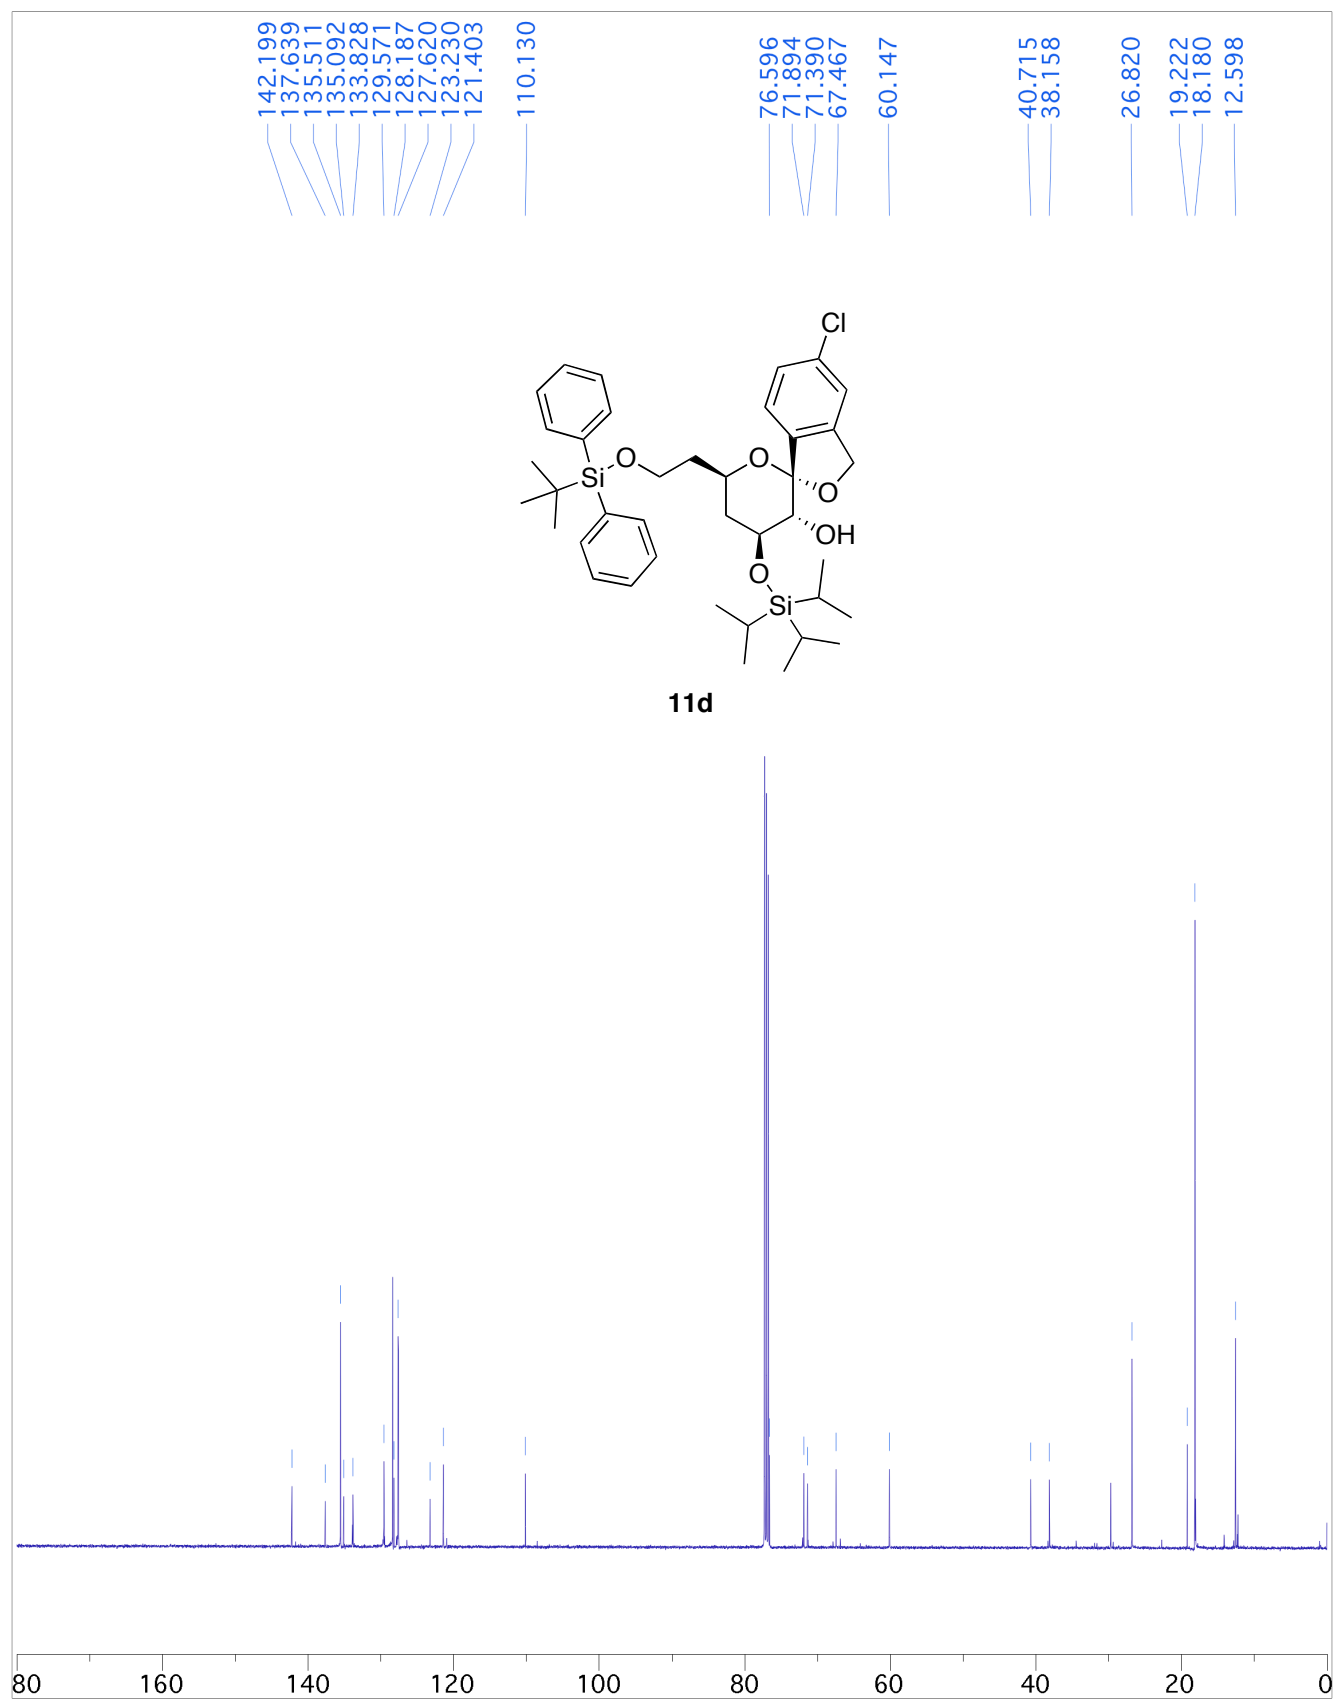

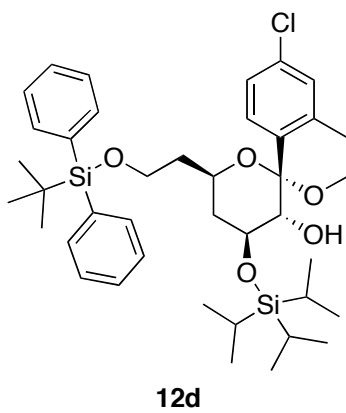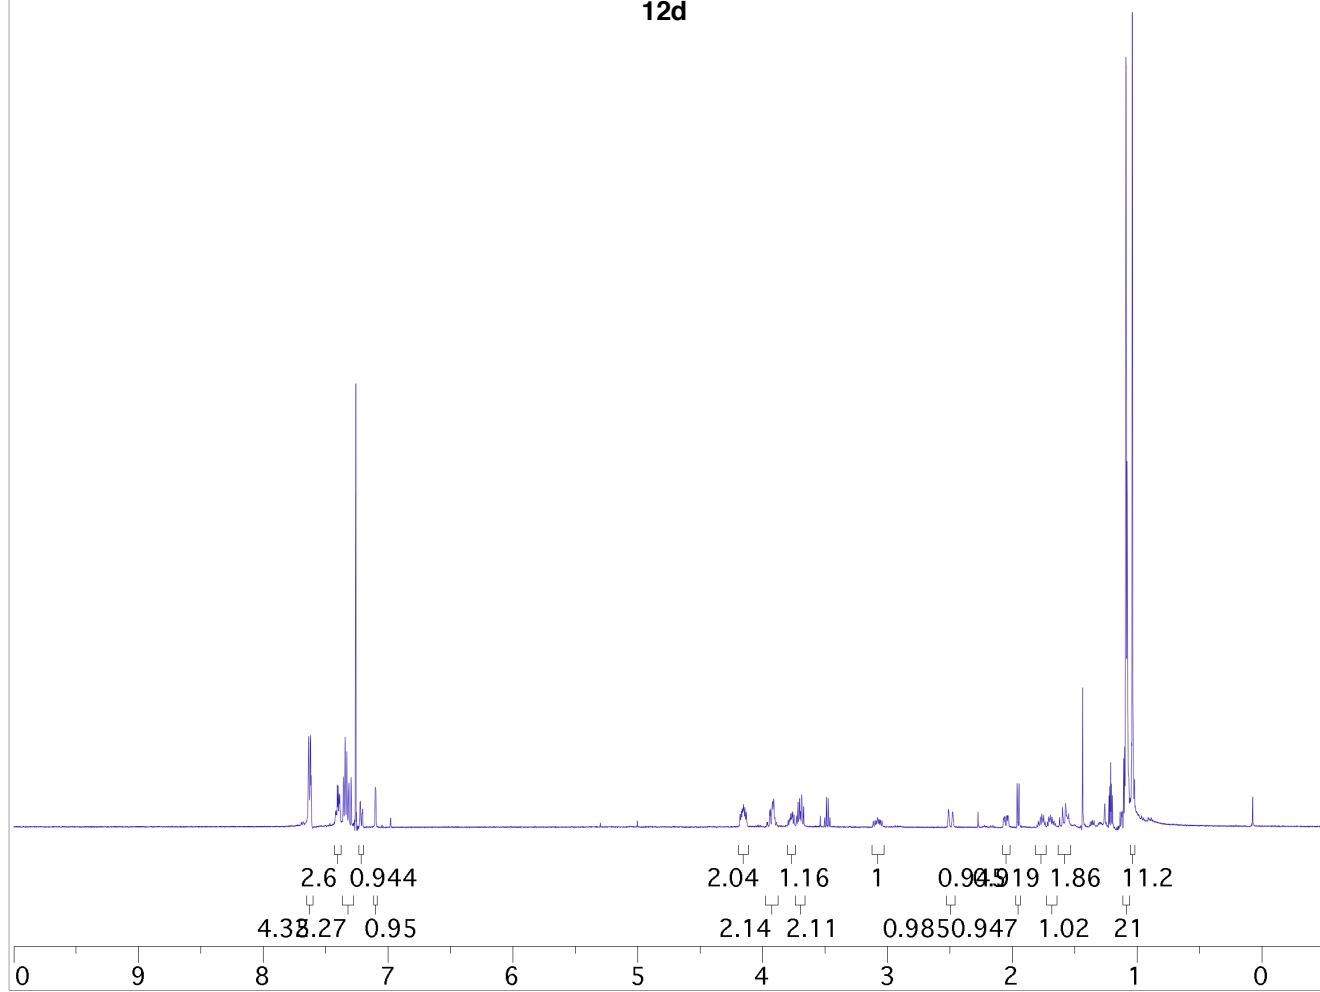

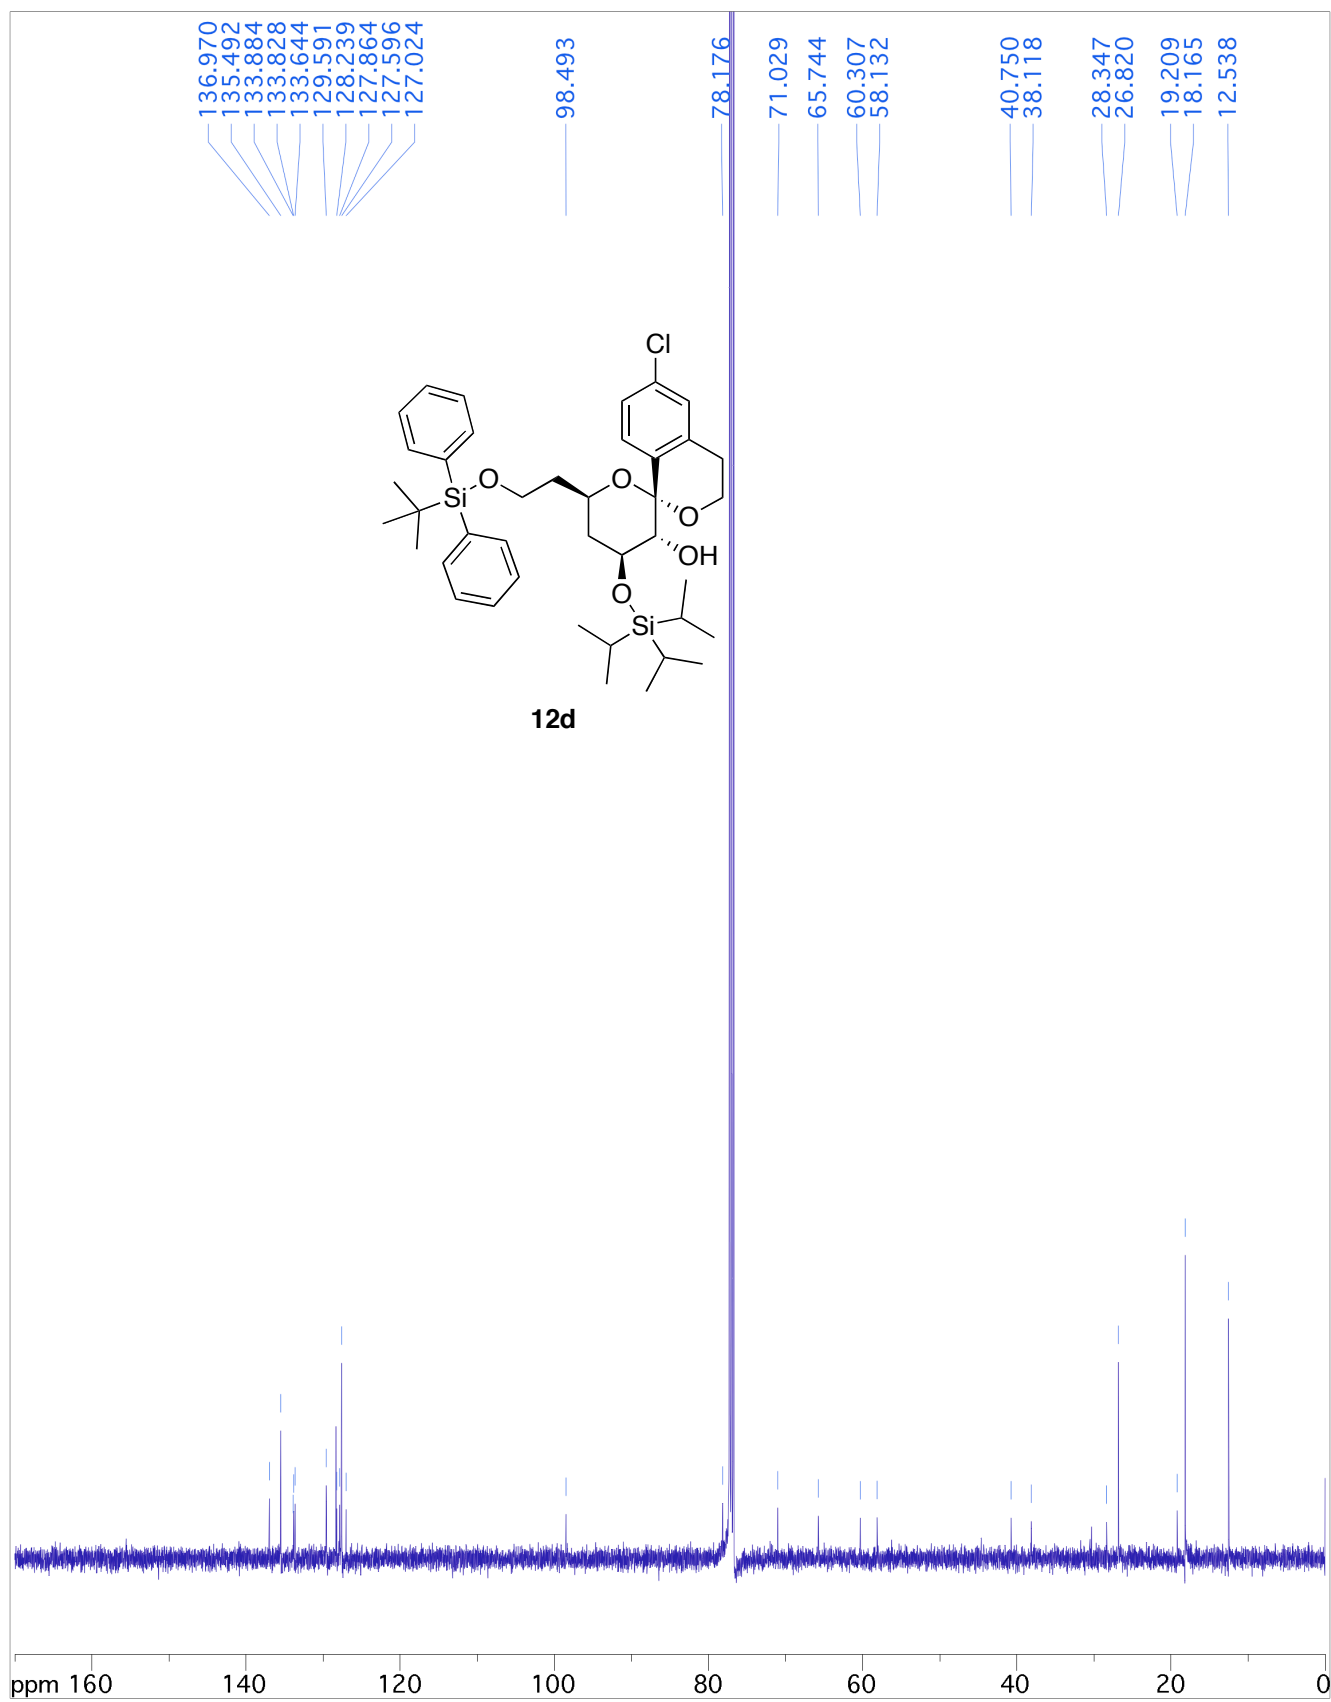

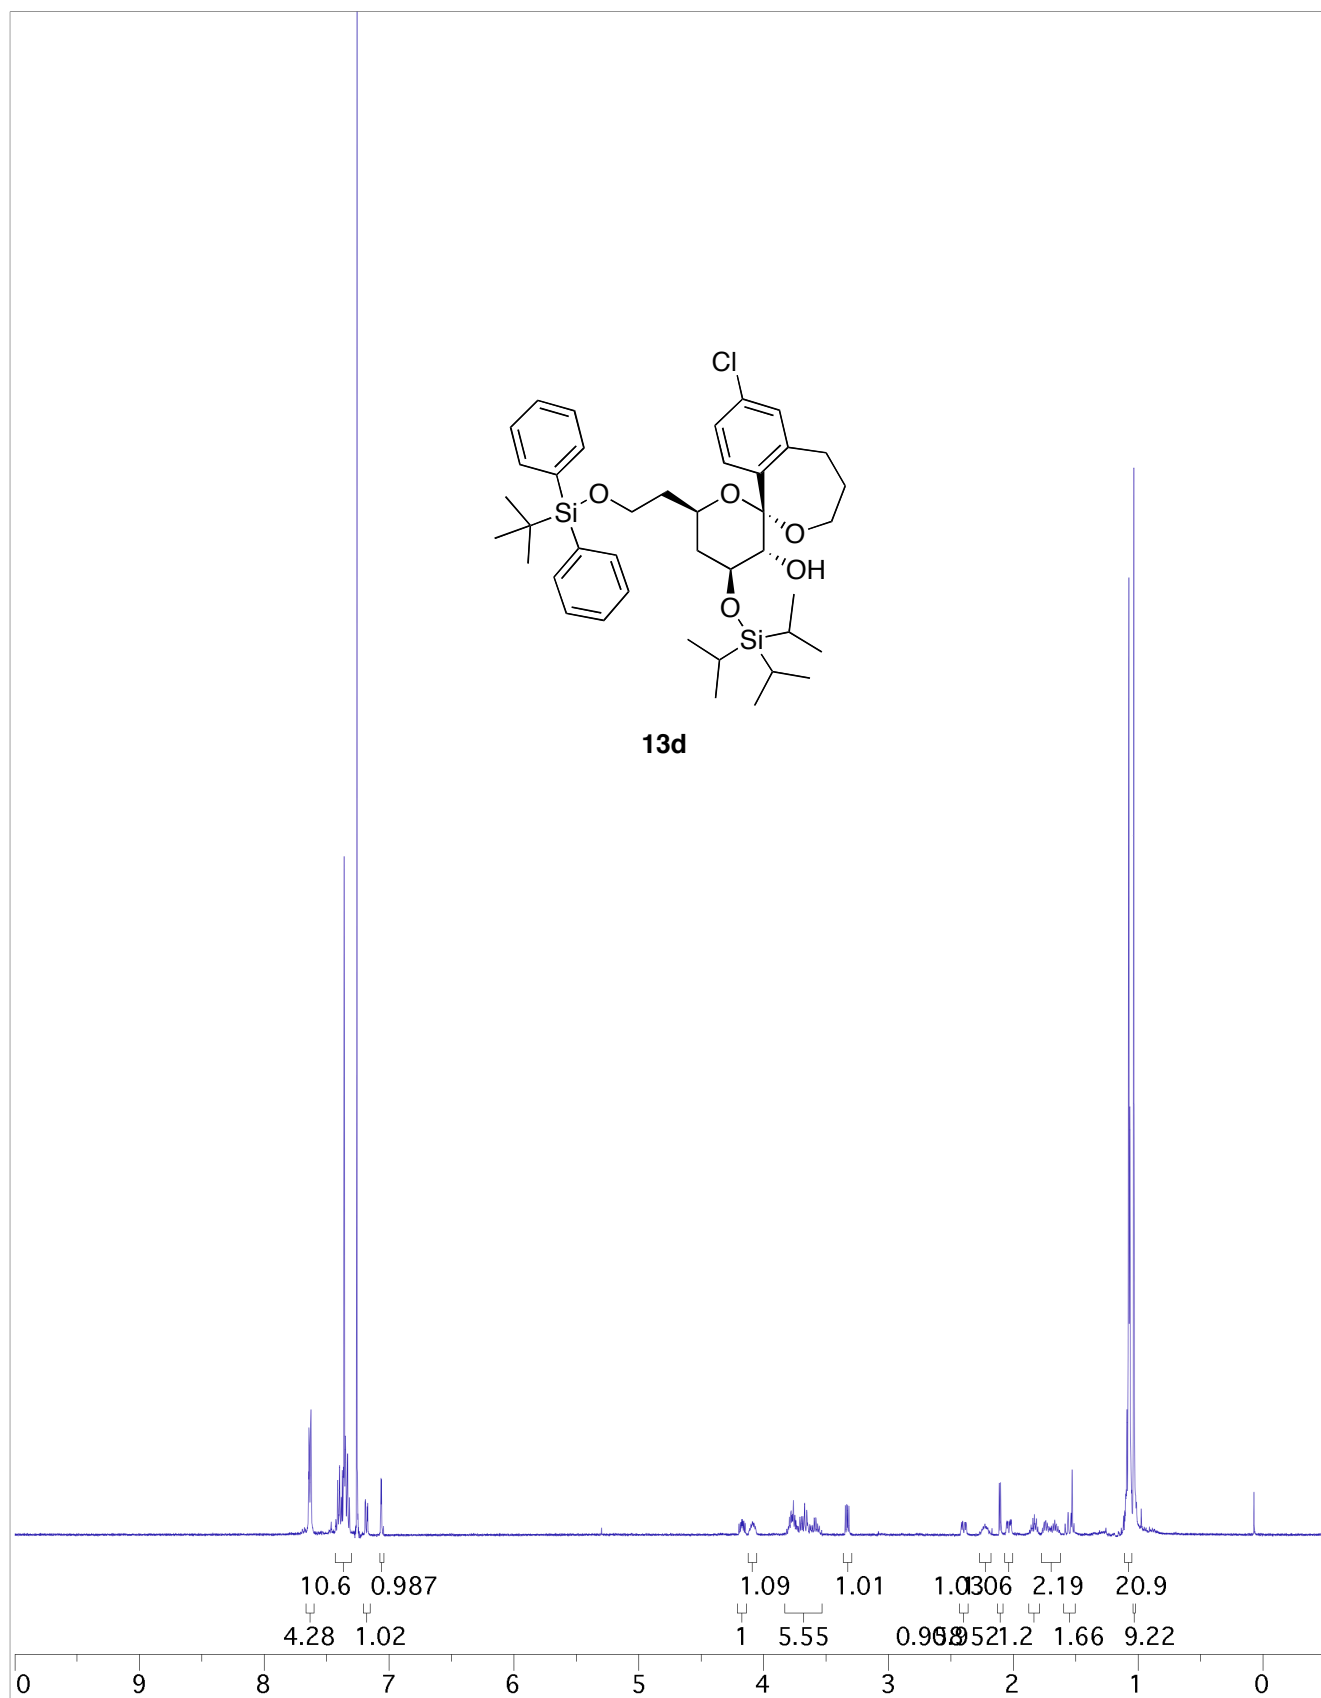

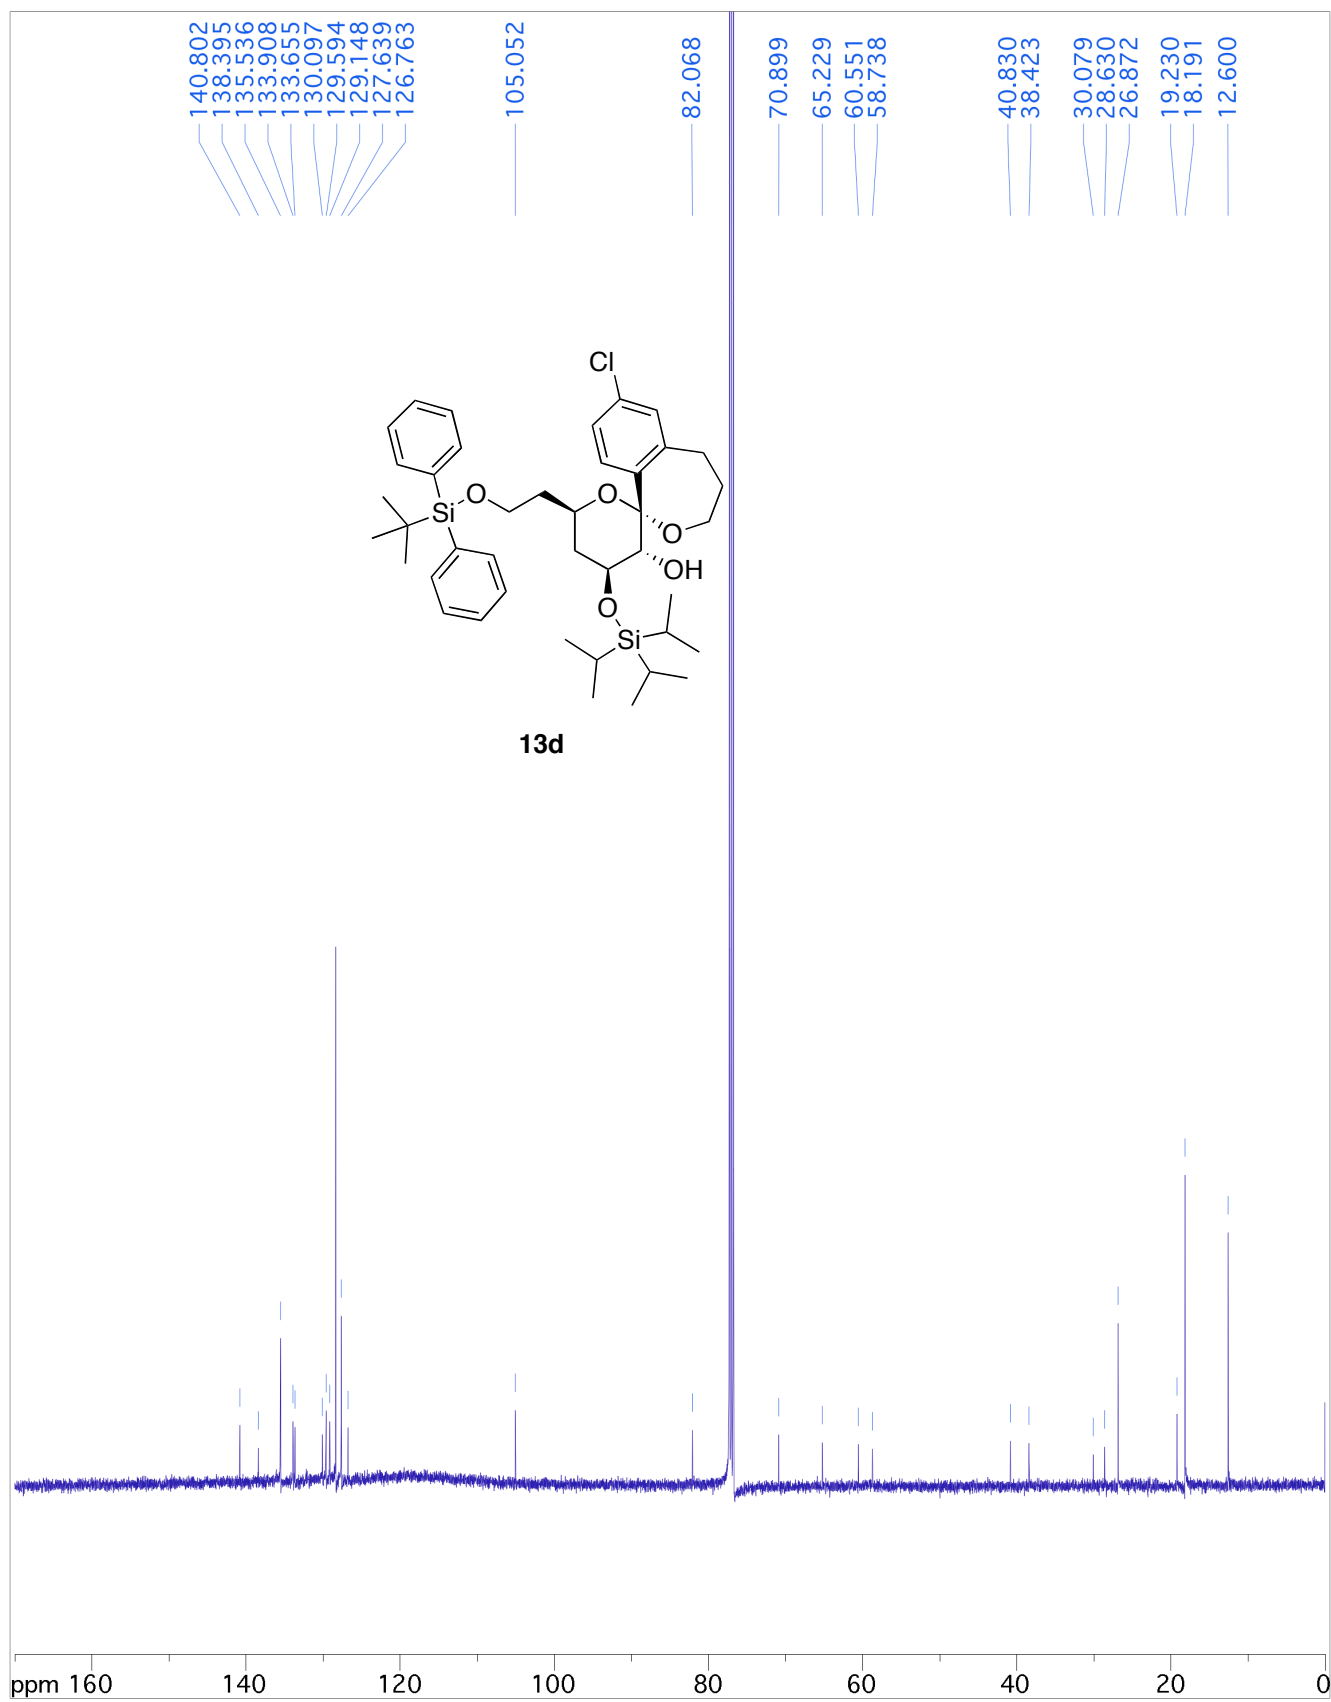

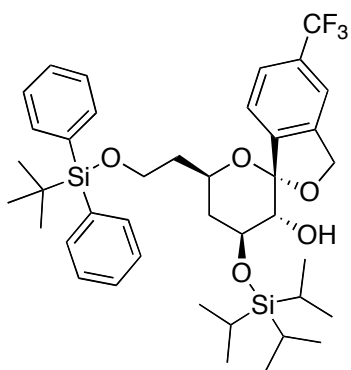**11e**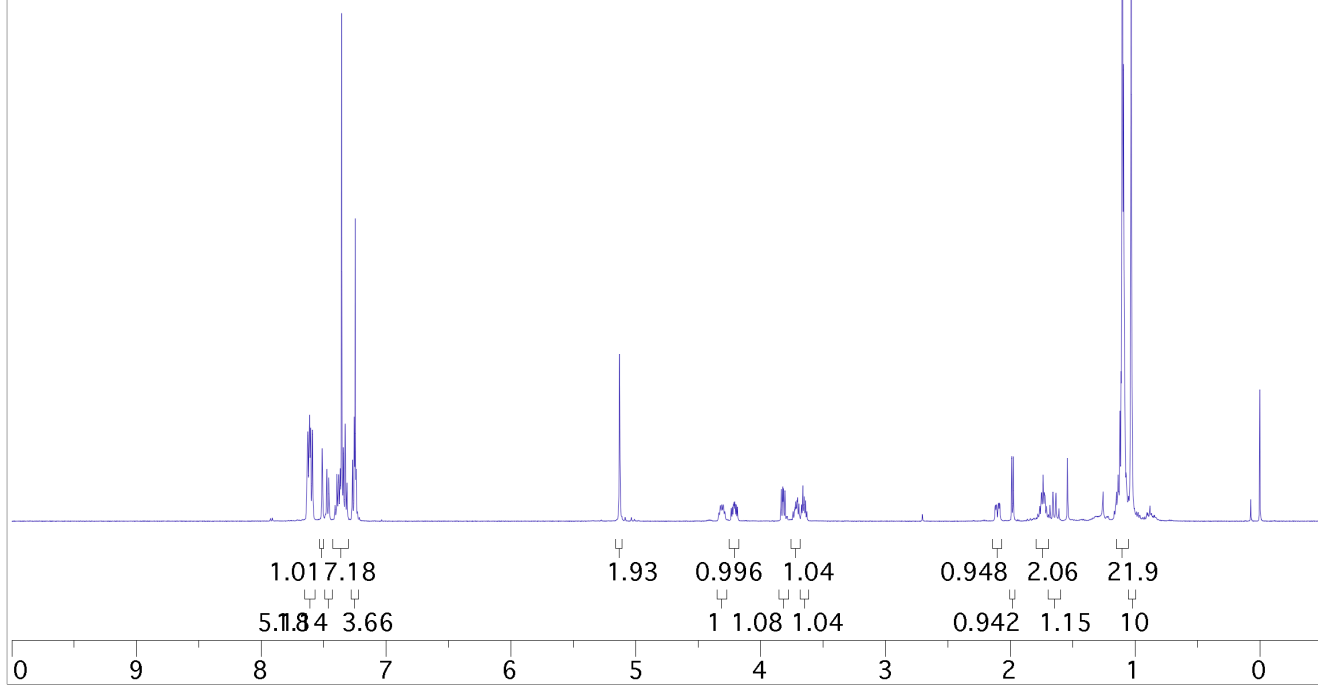



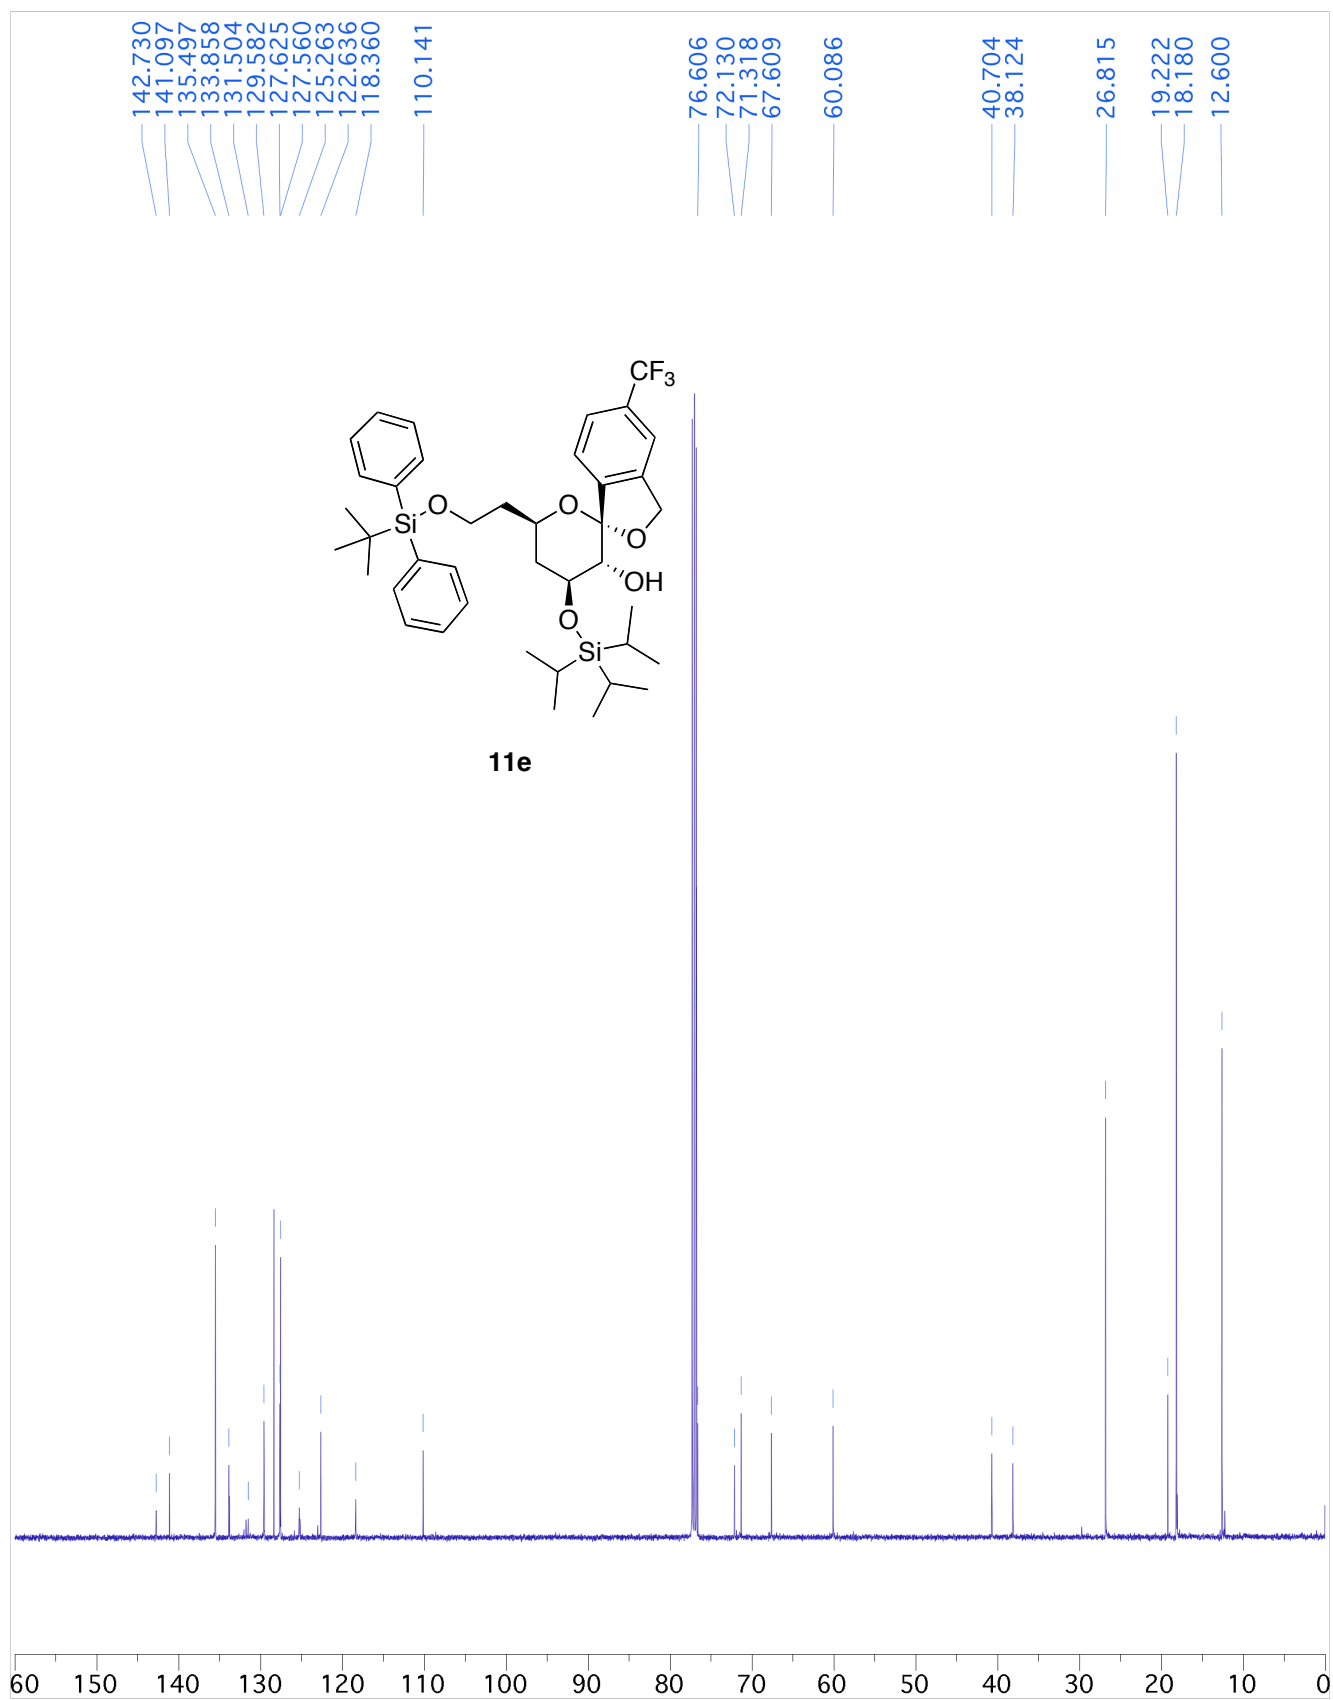

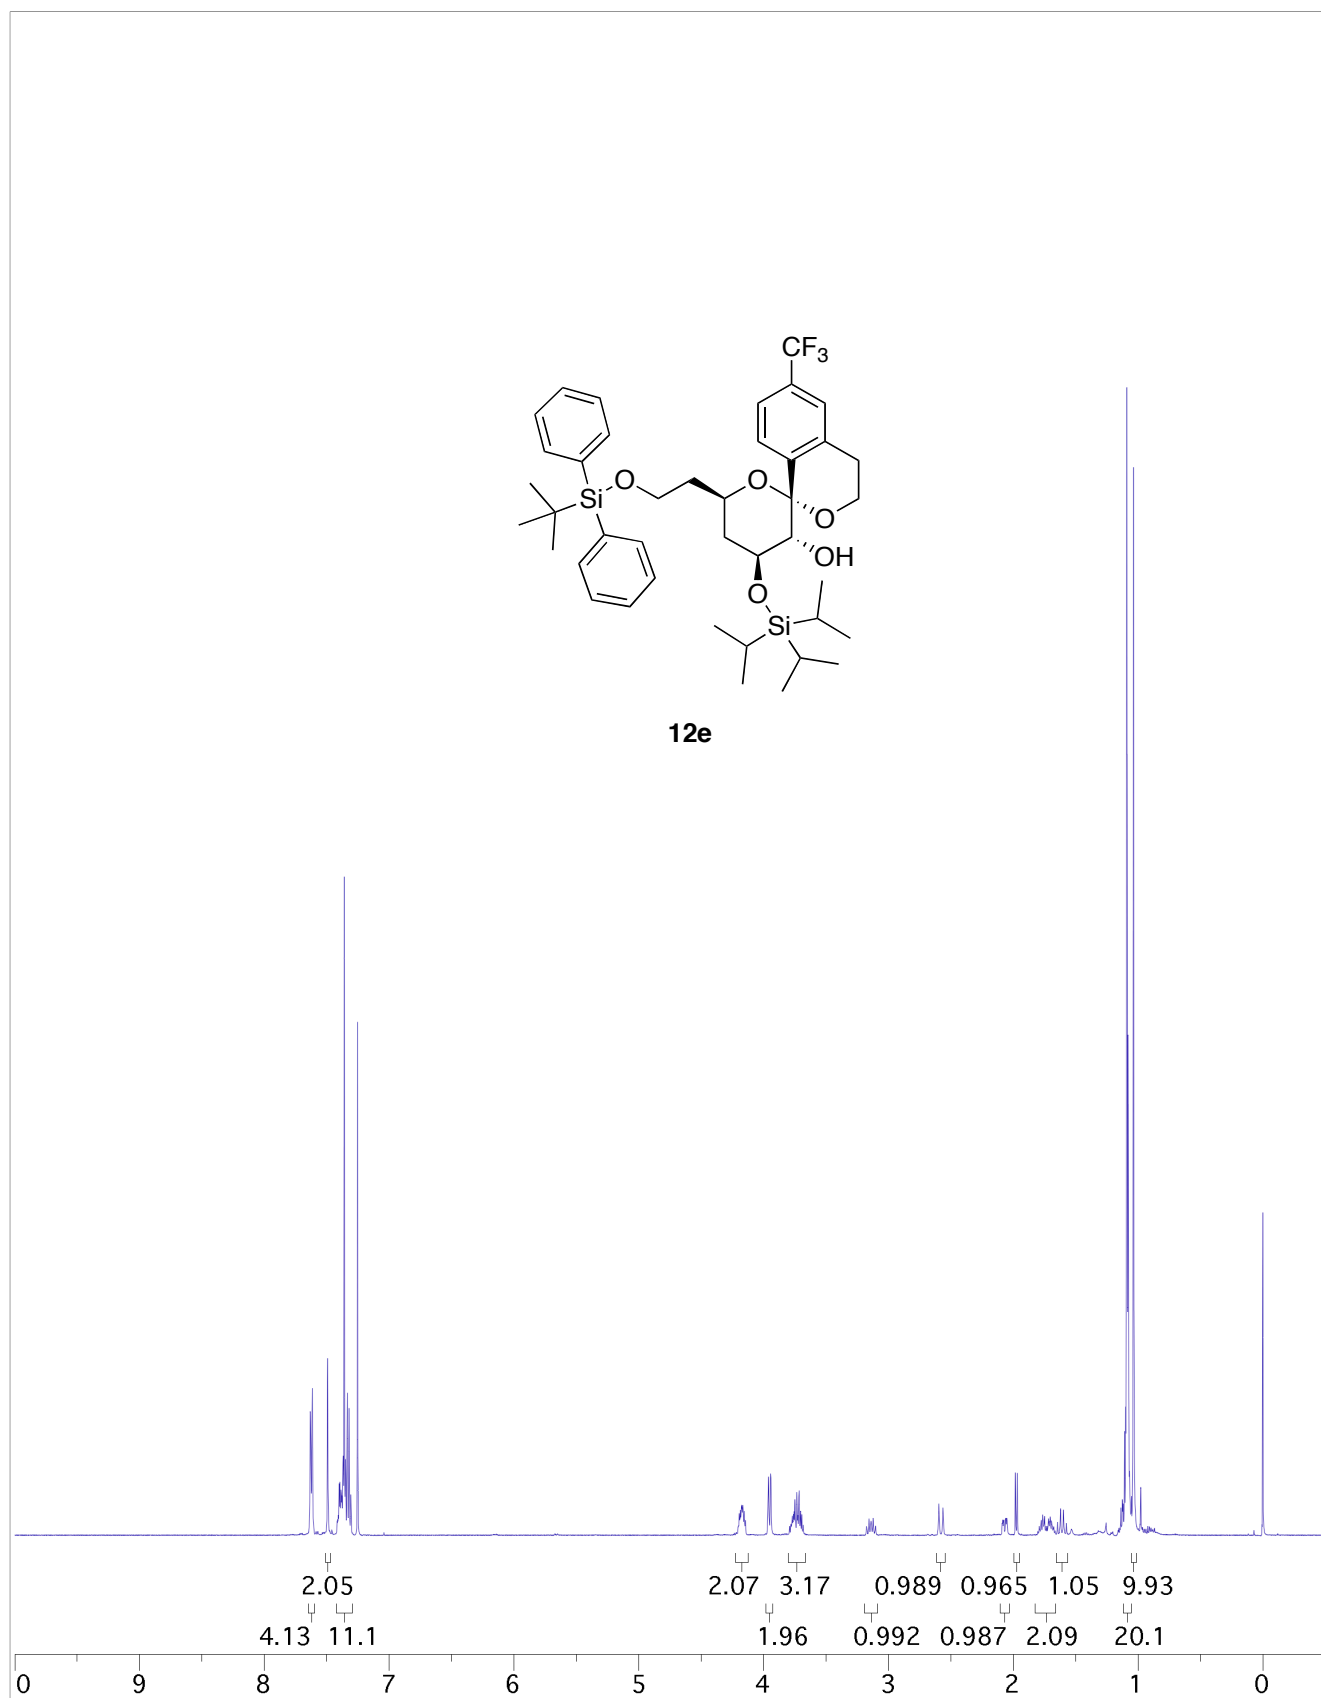

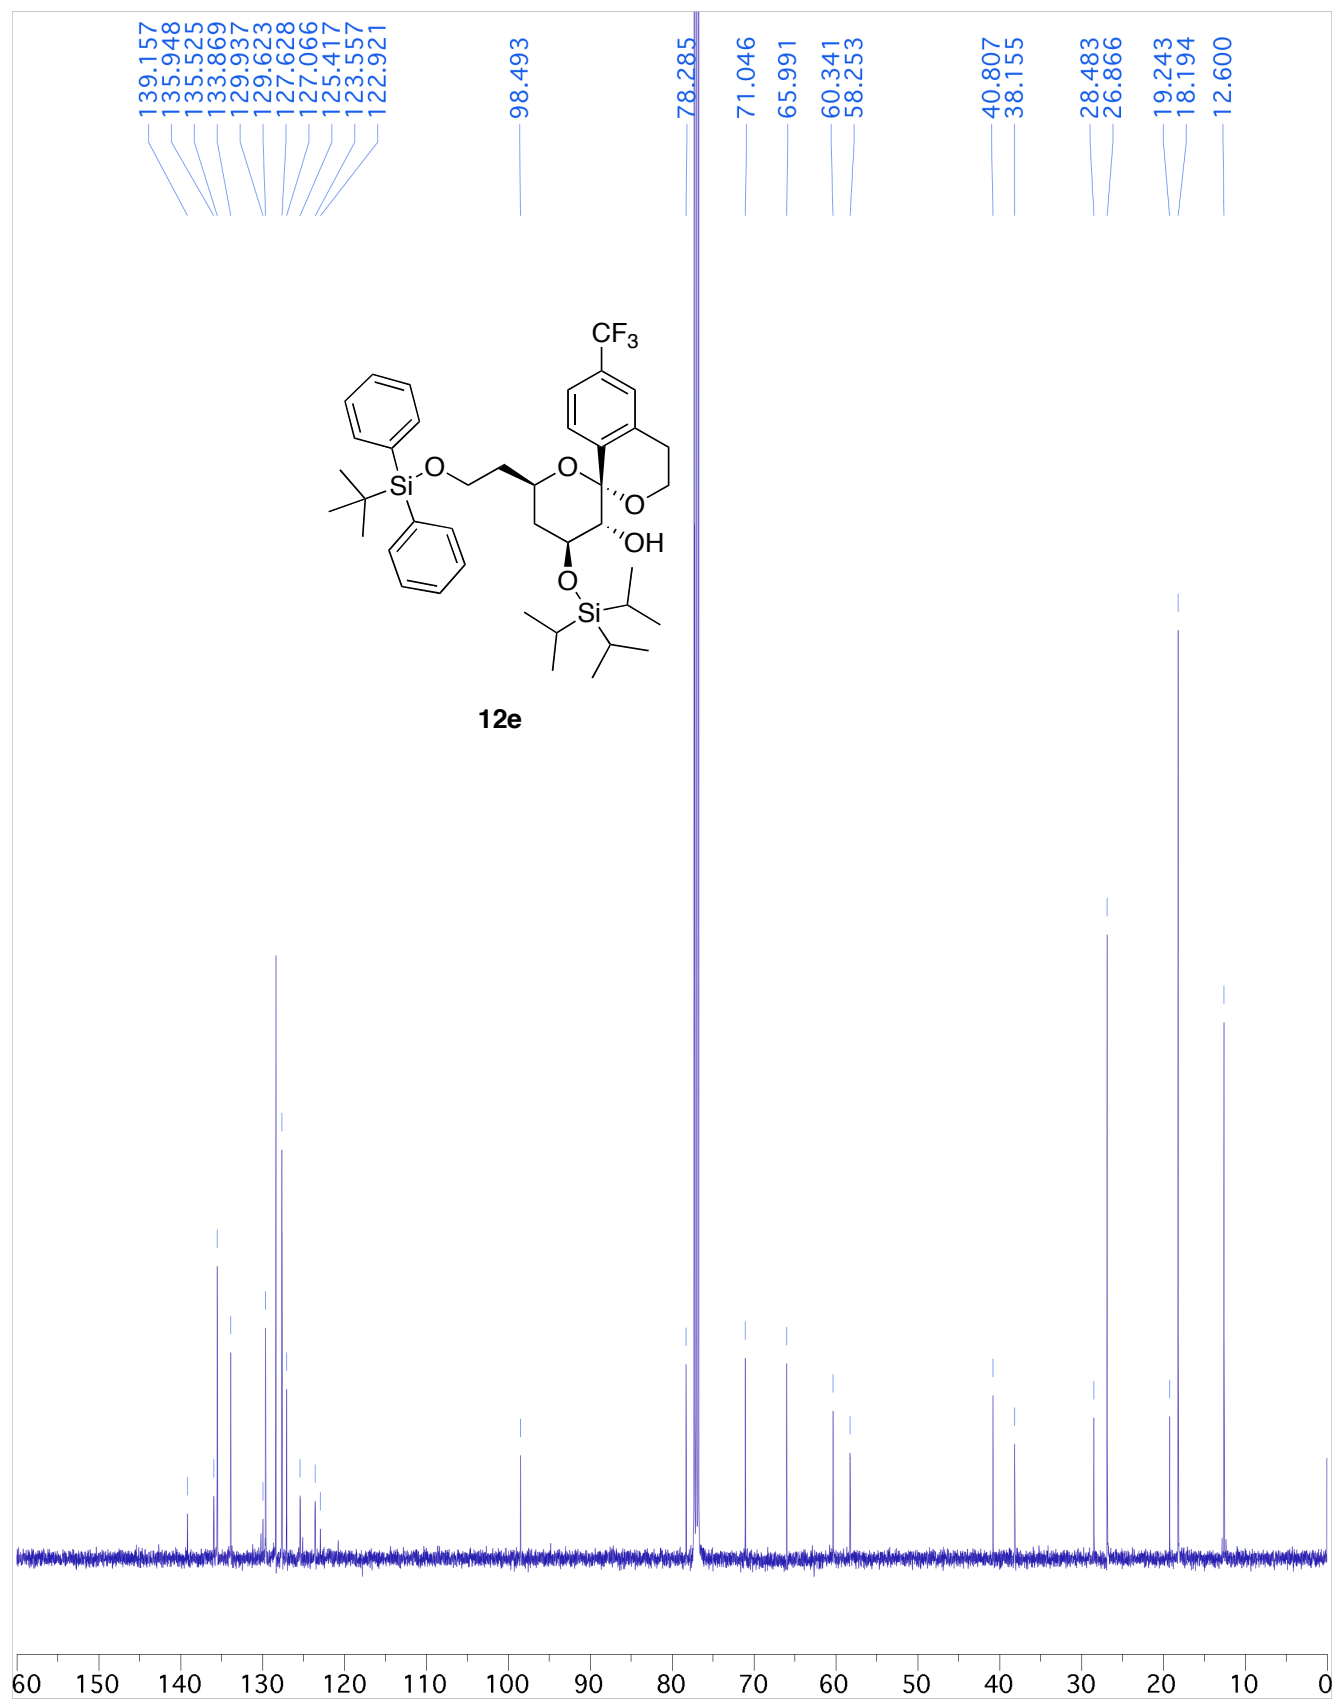

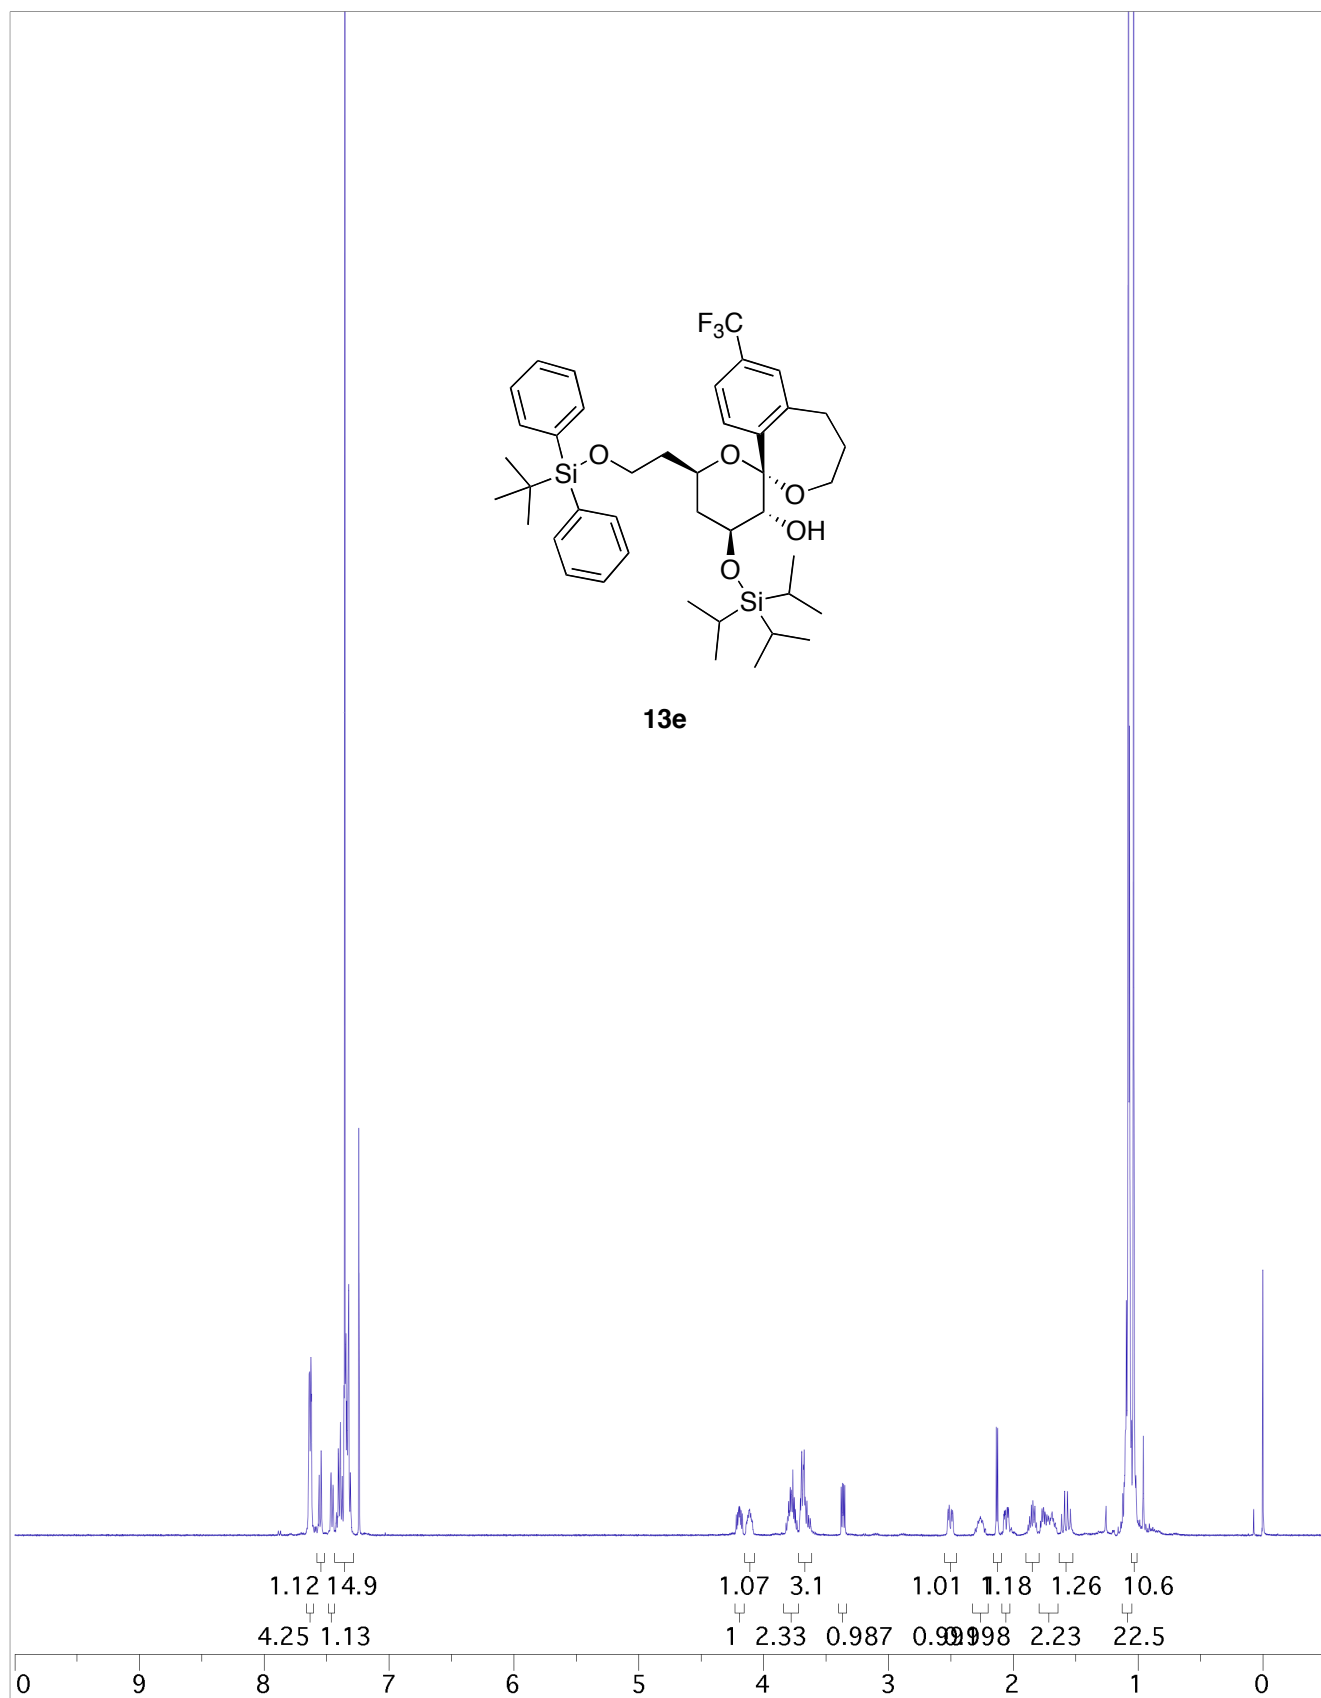

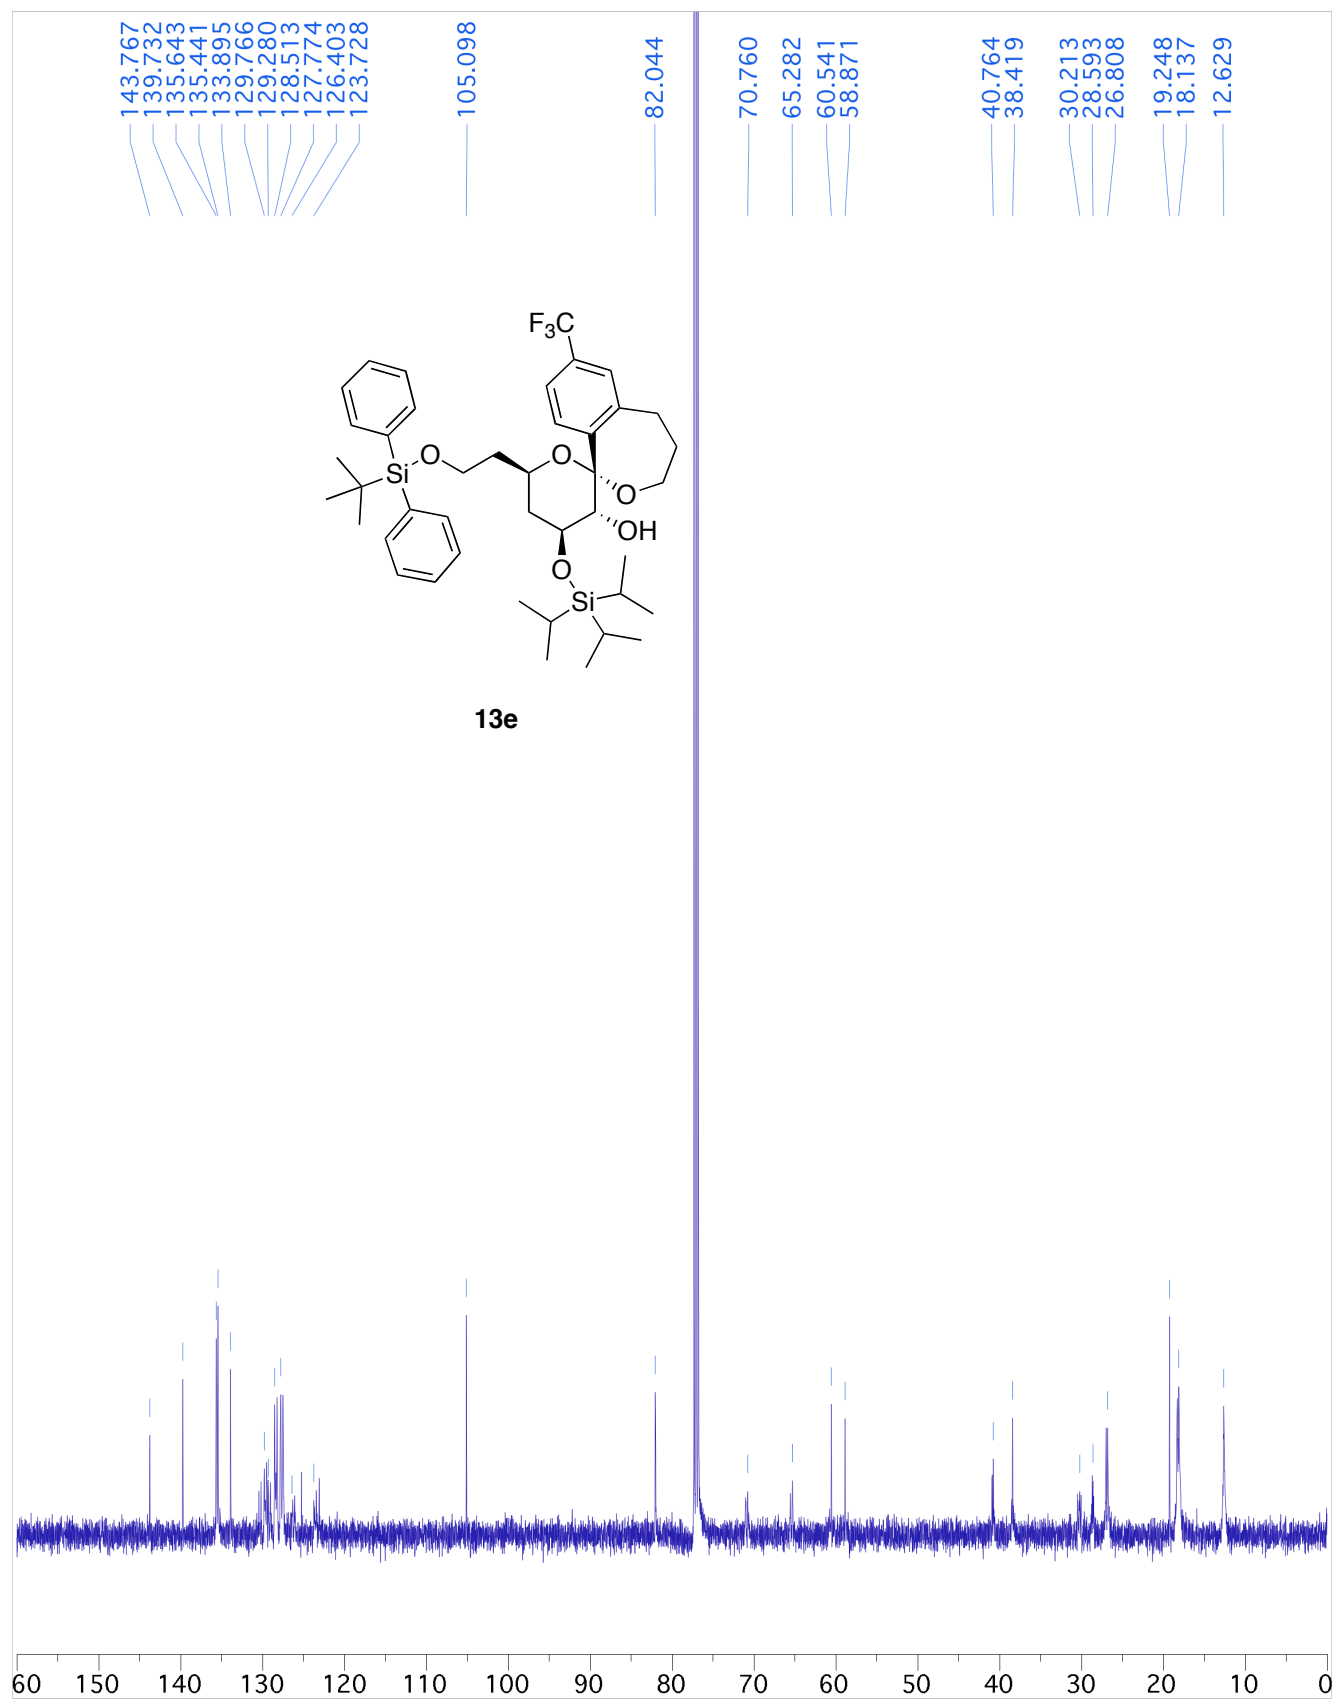

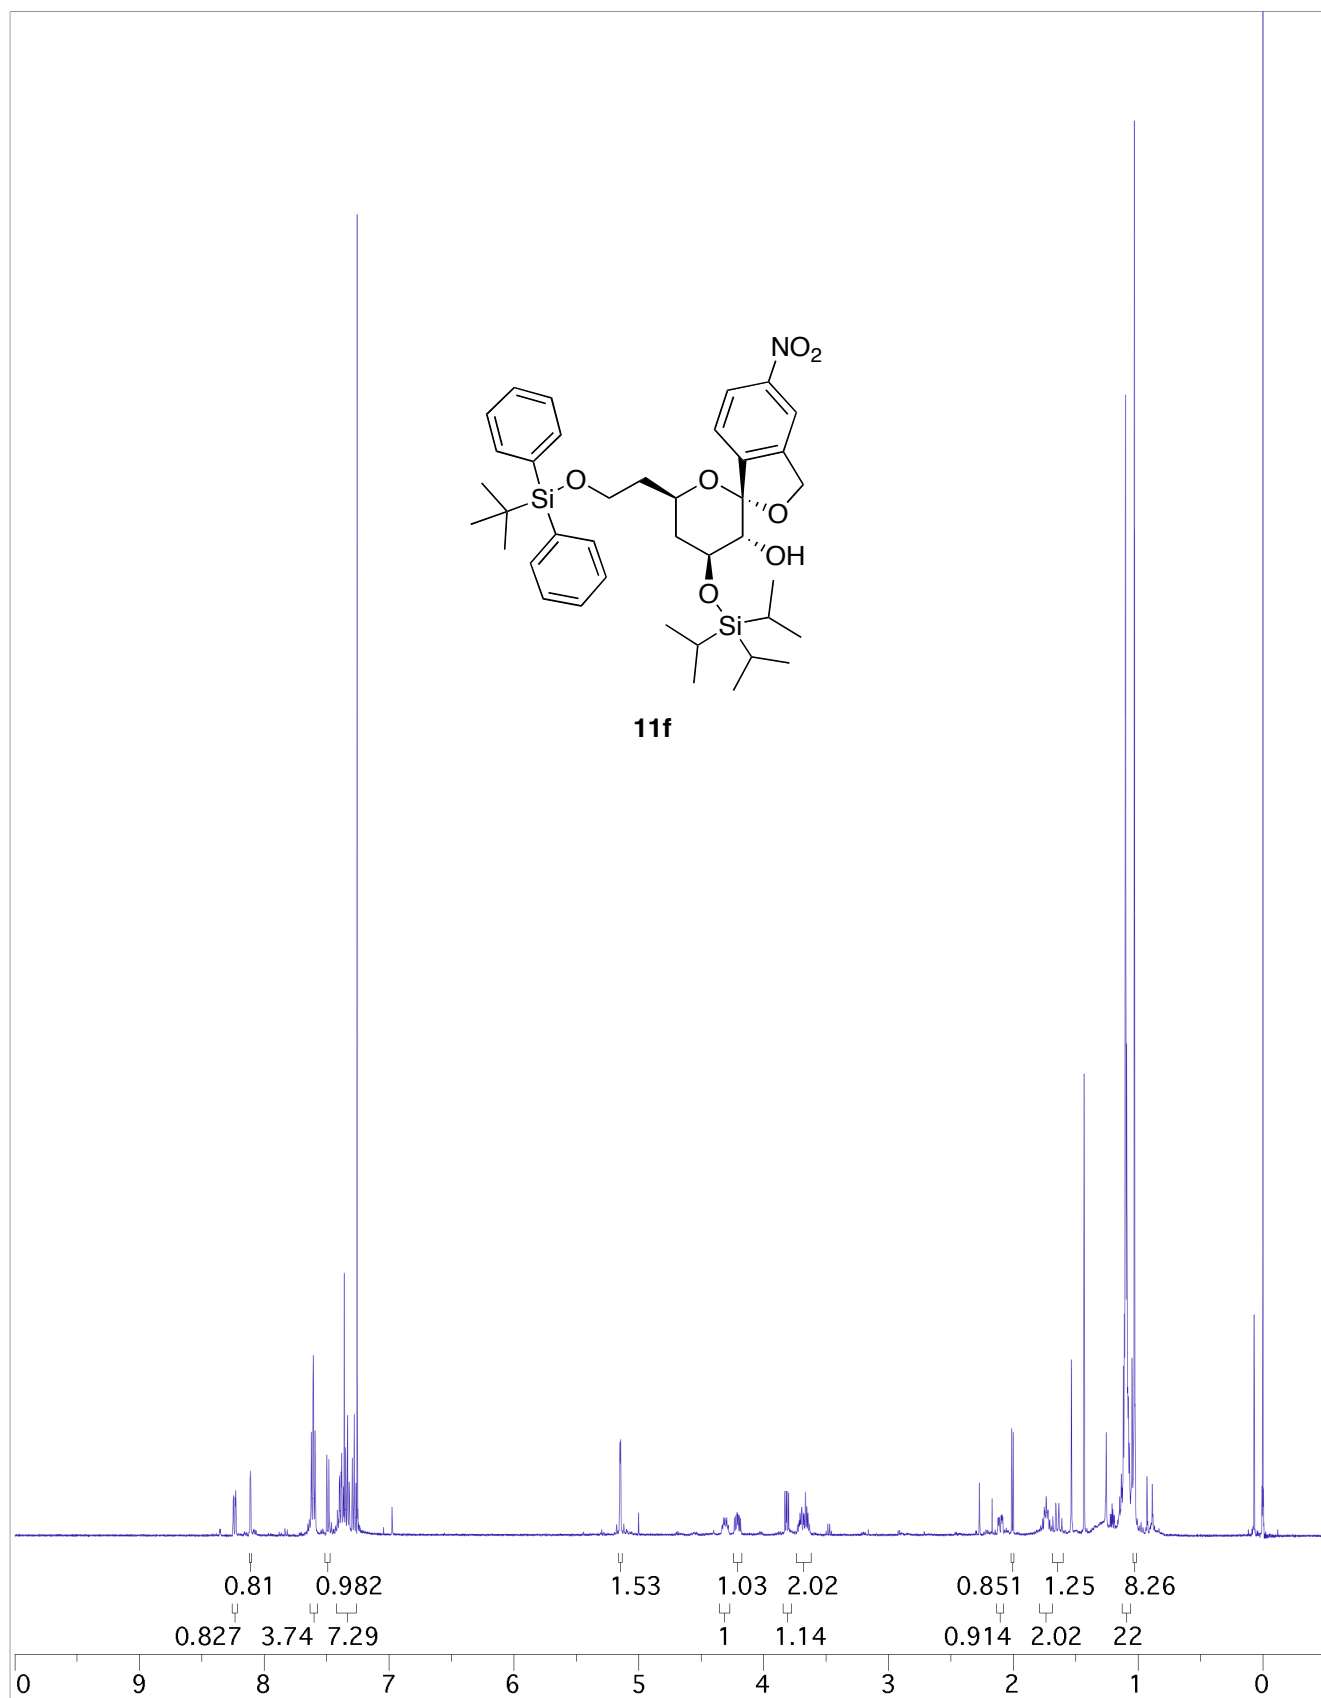

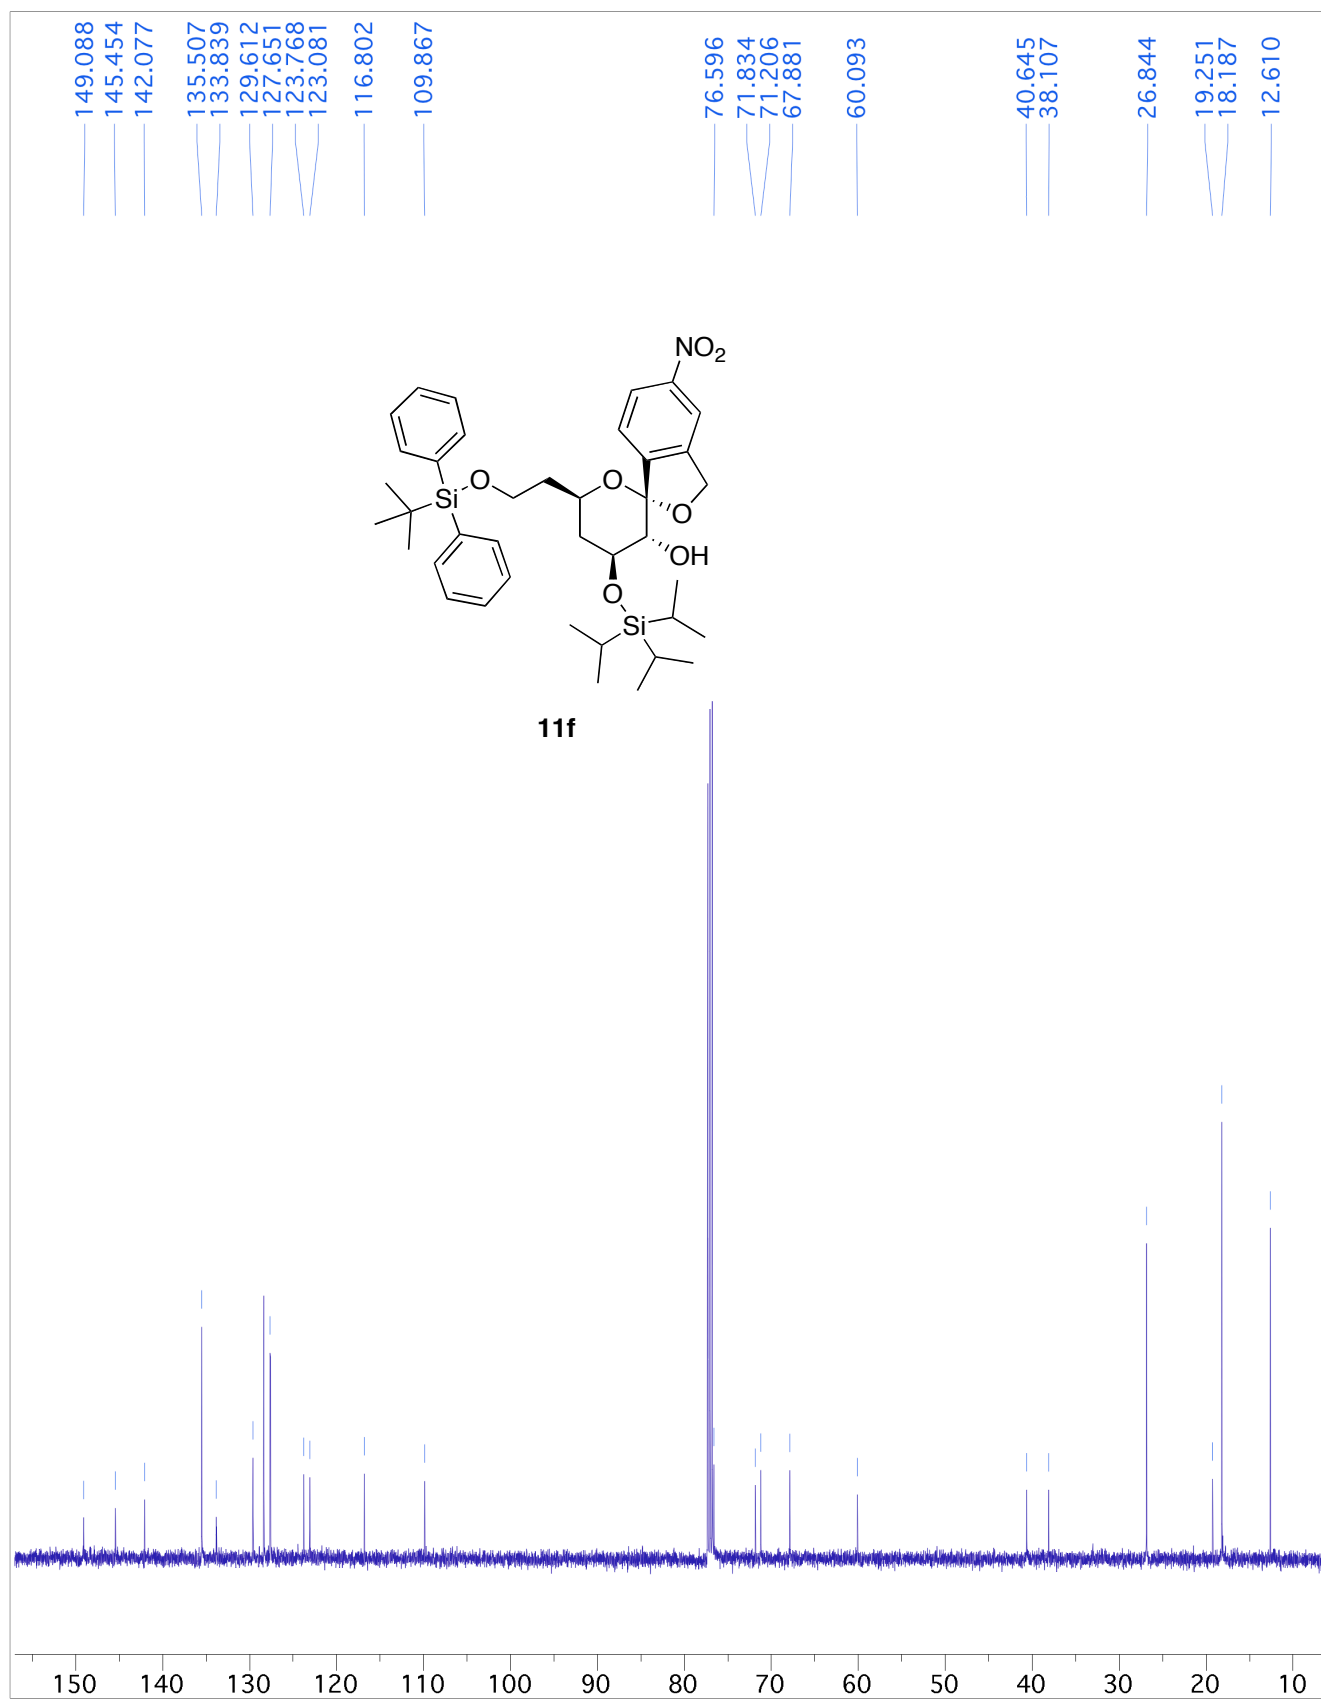

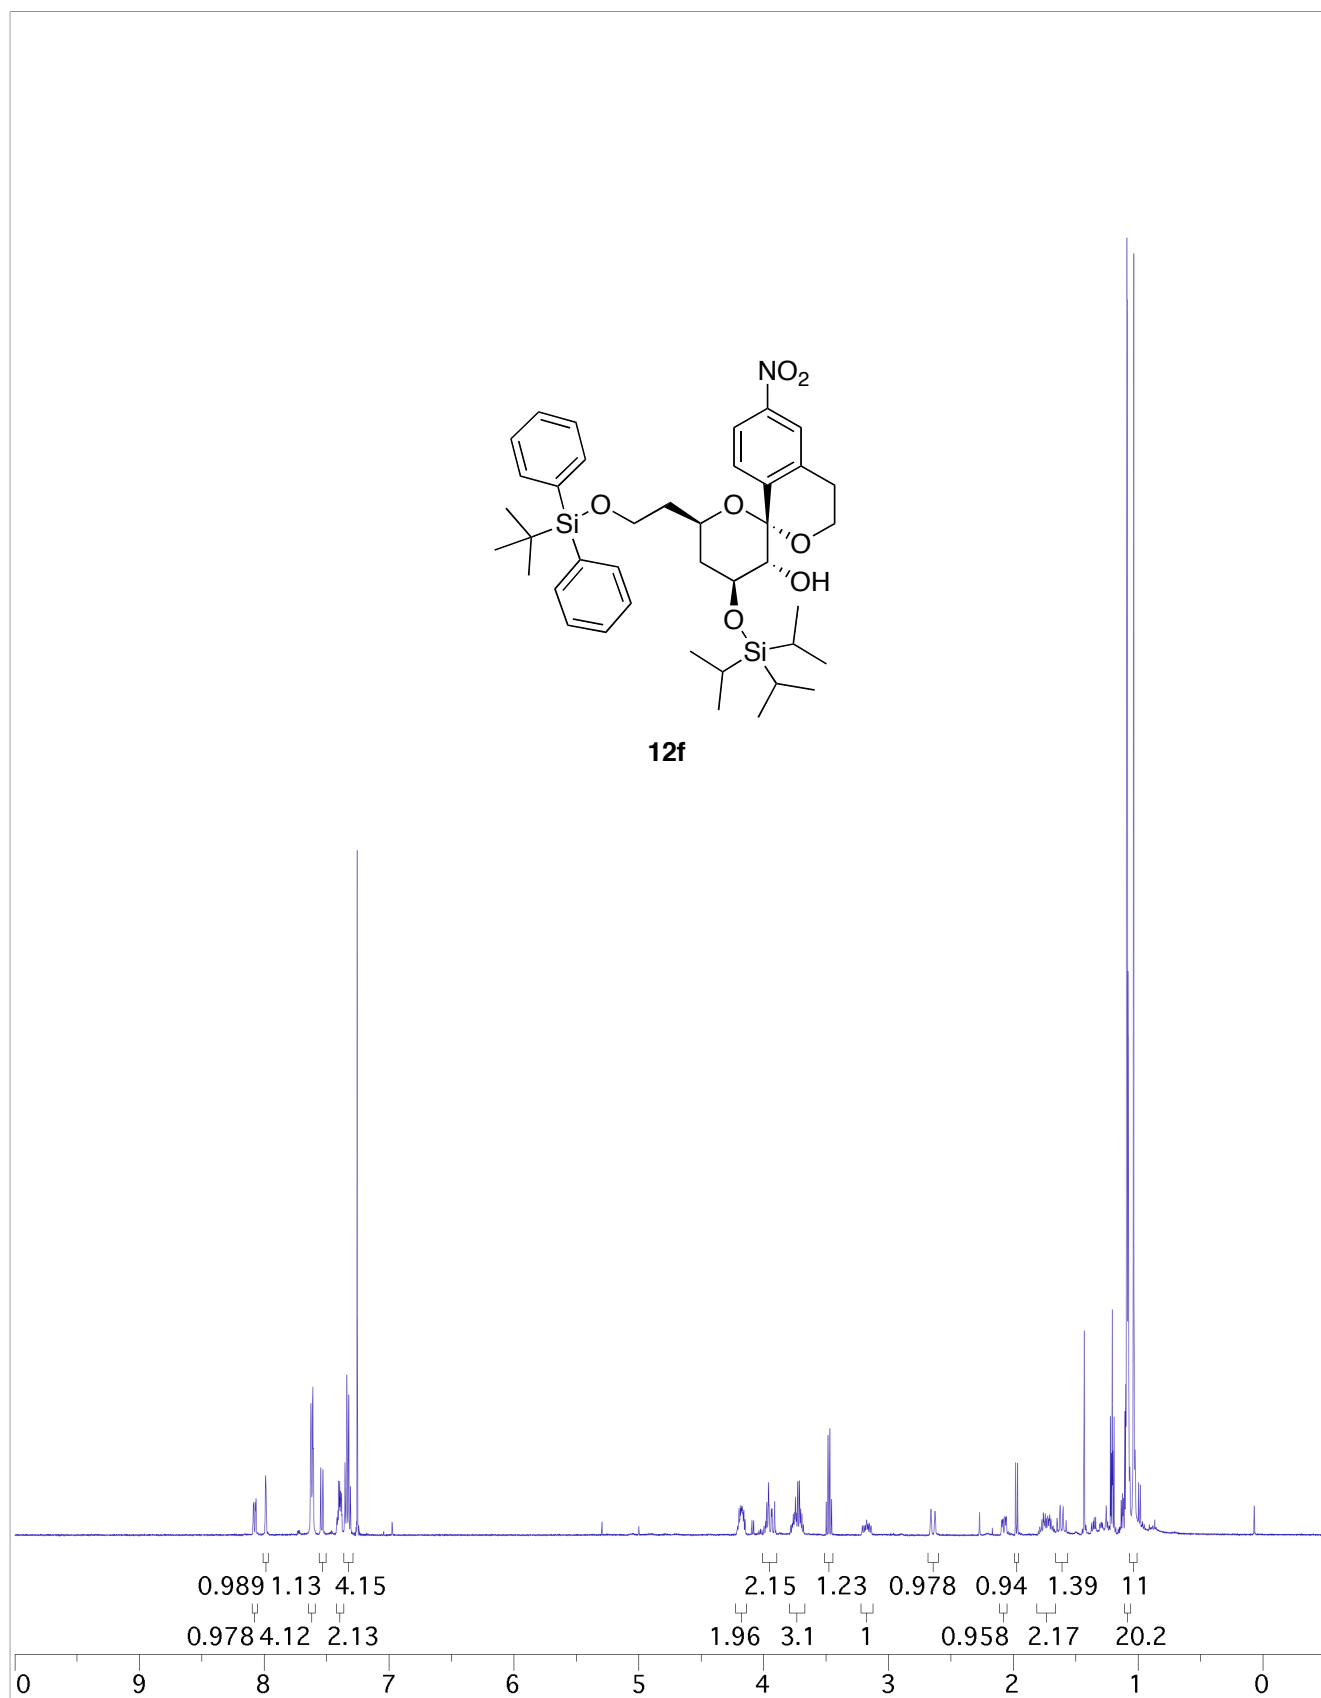



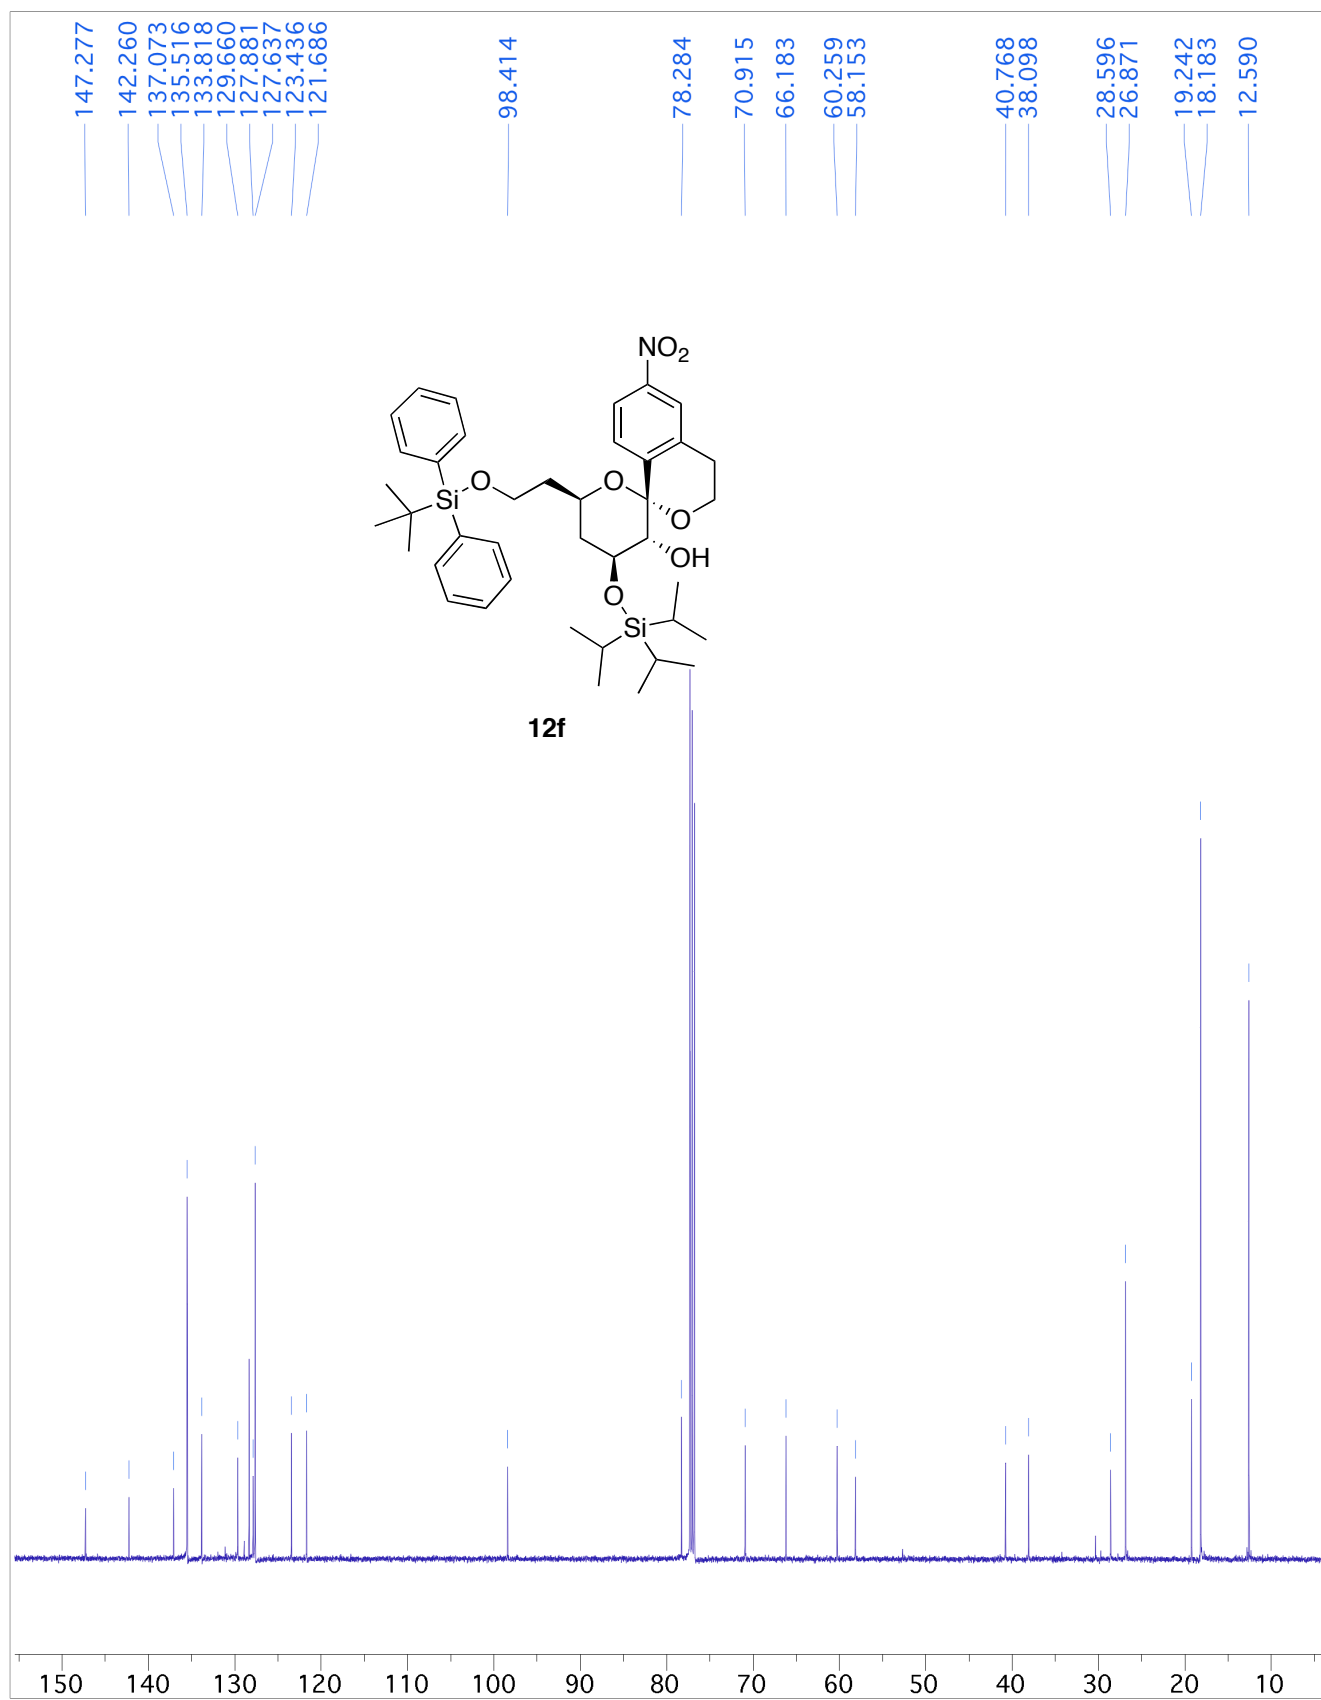

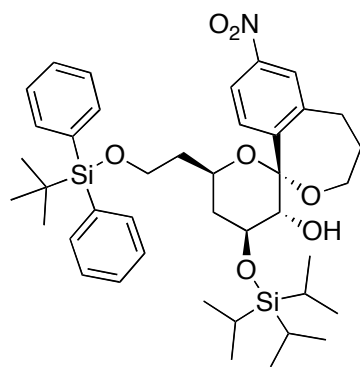**13f**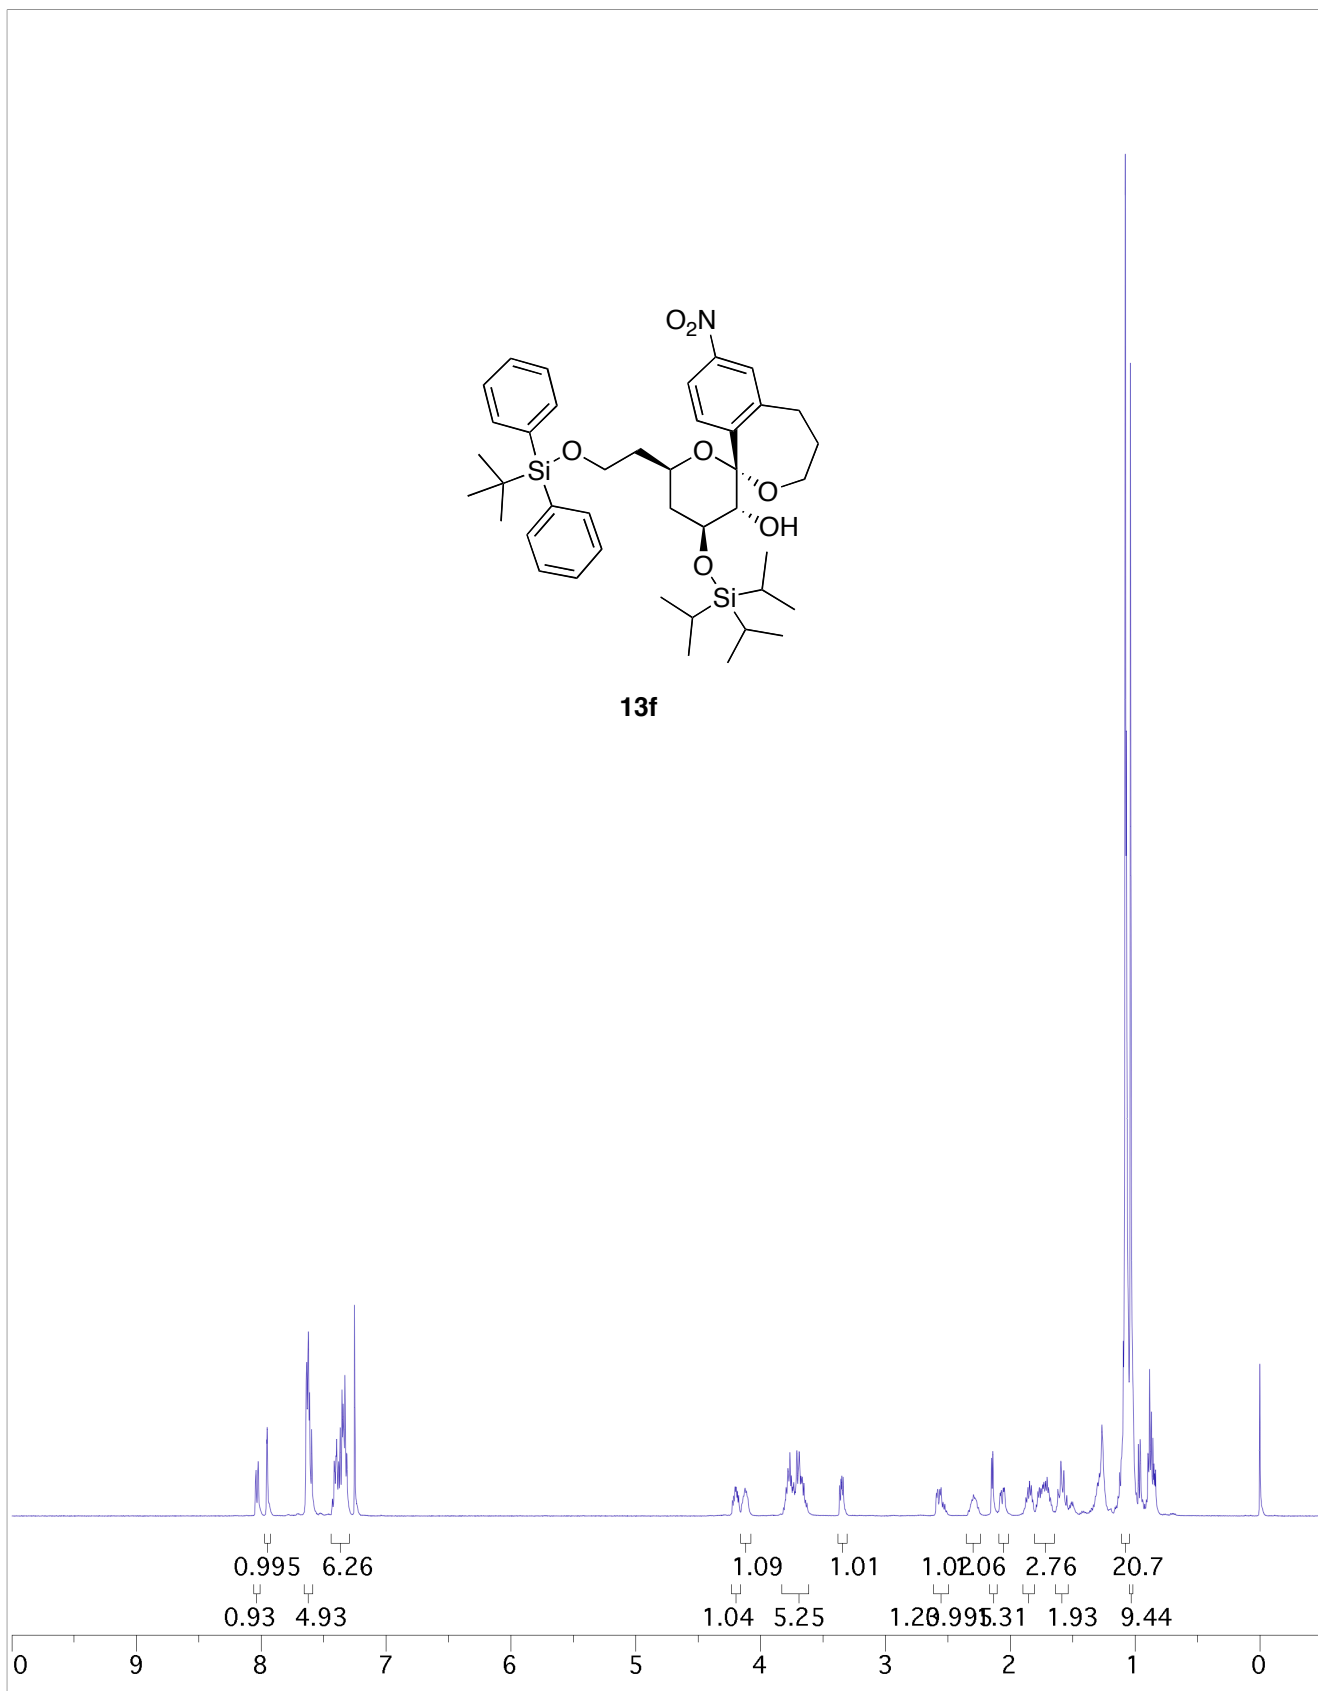

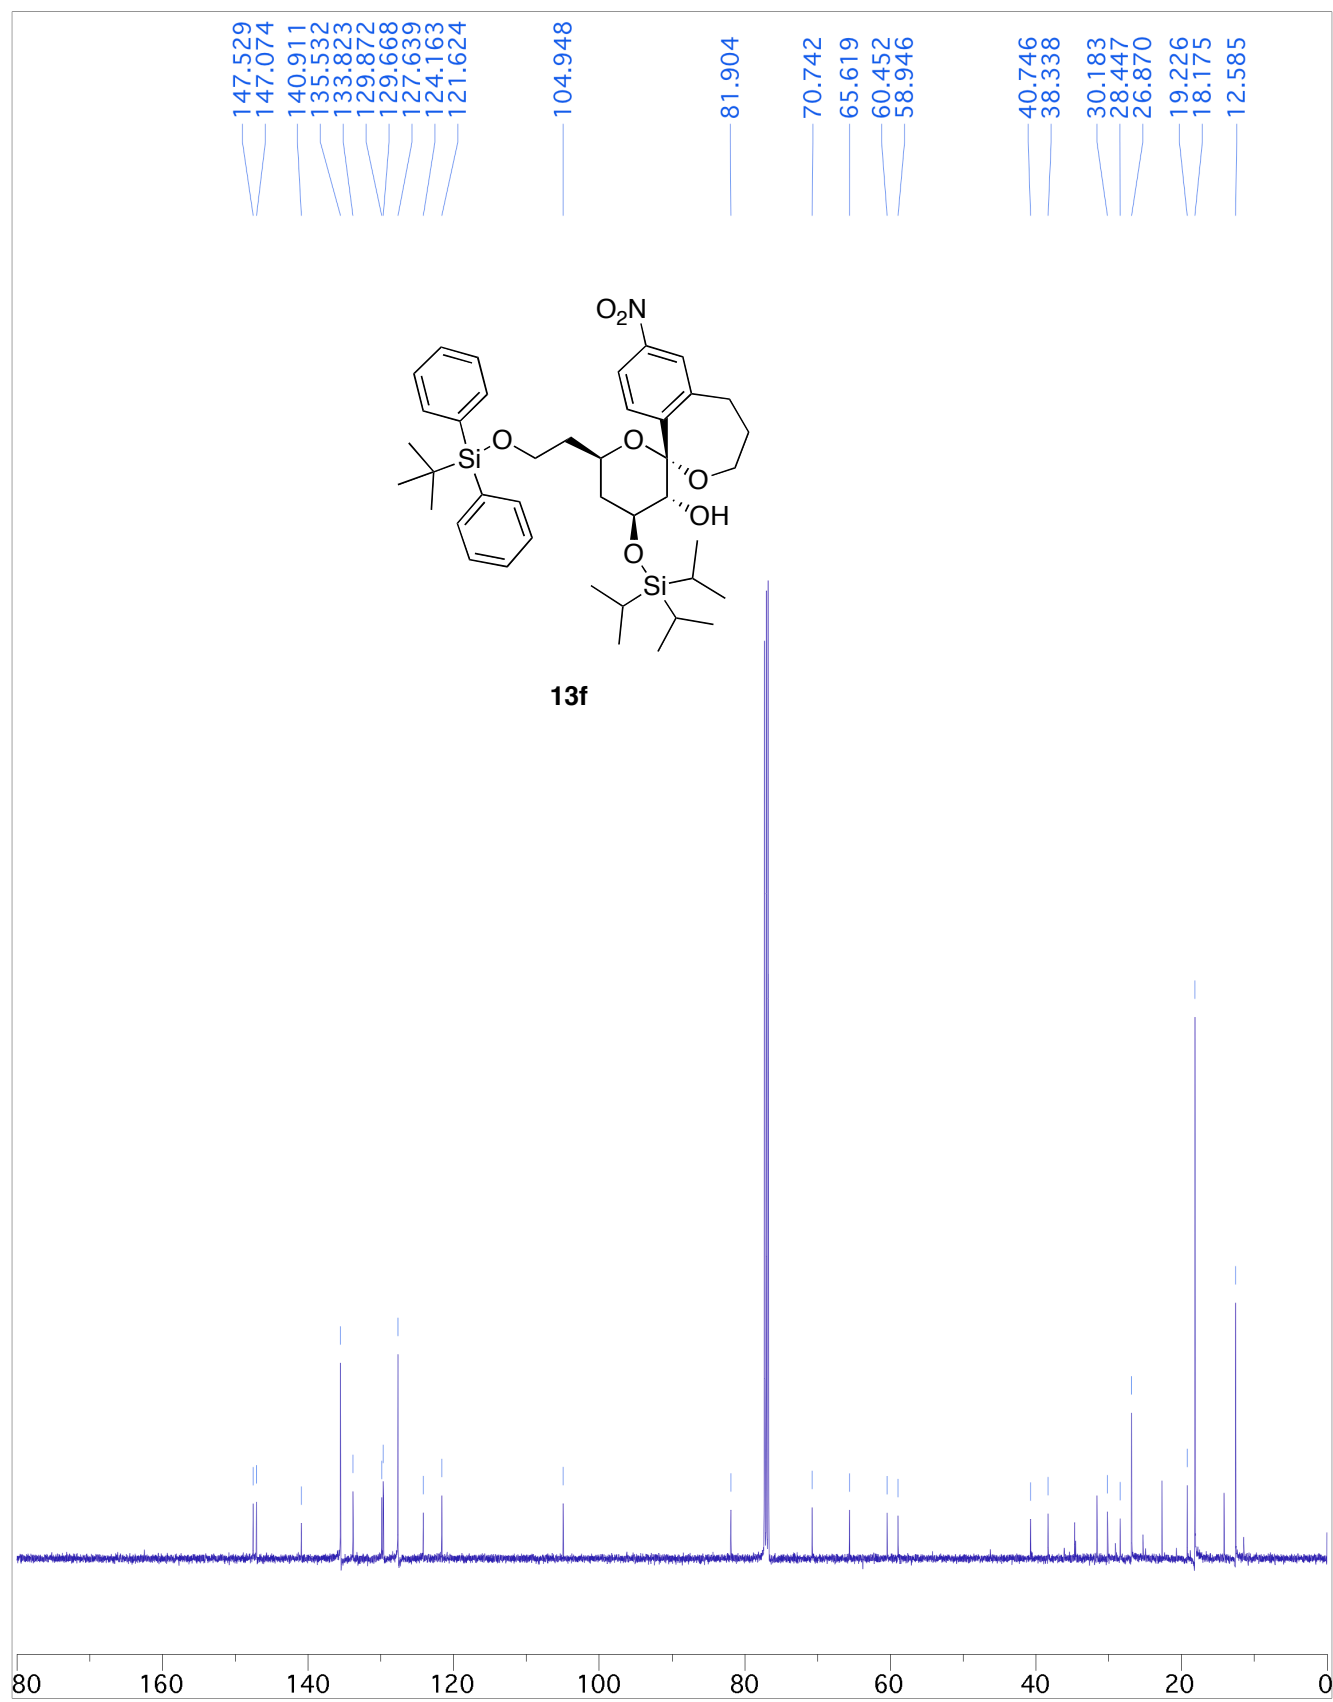

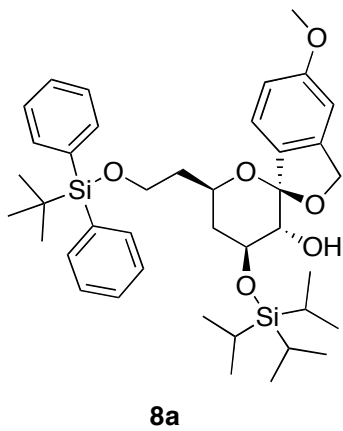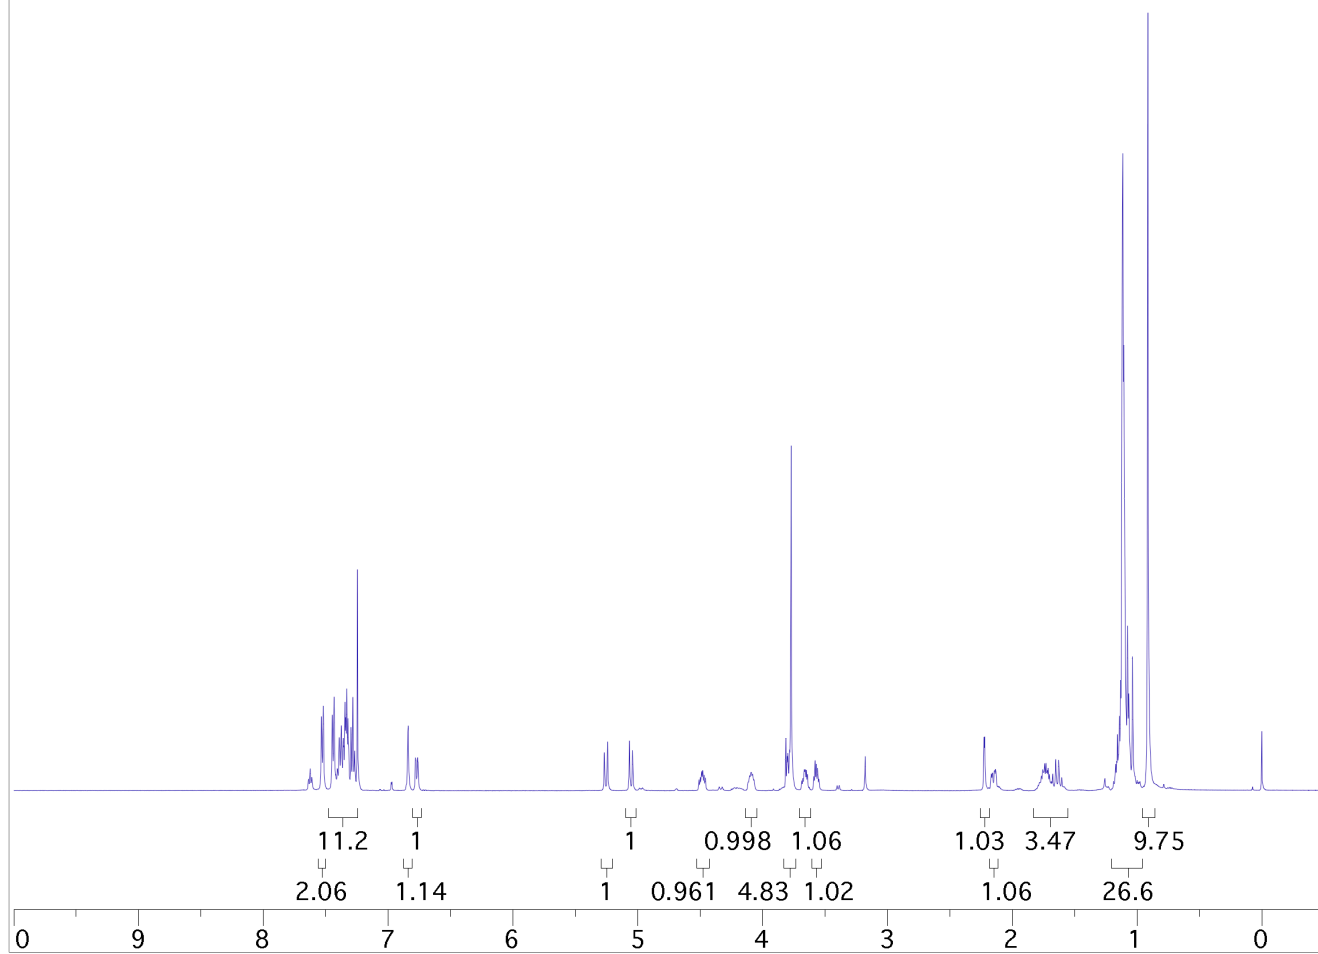

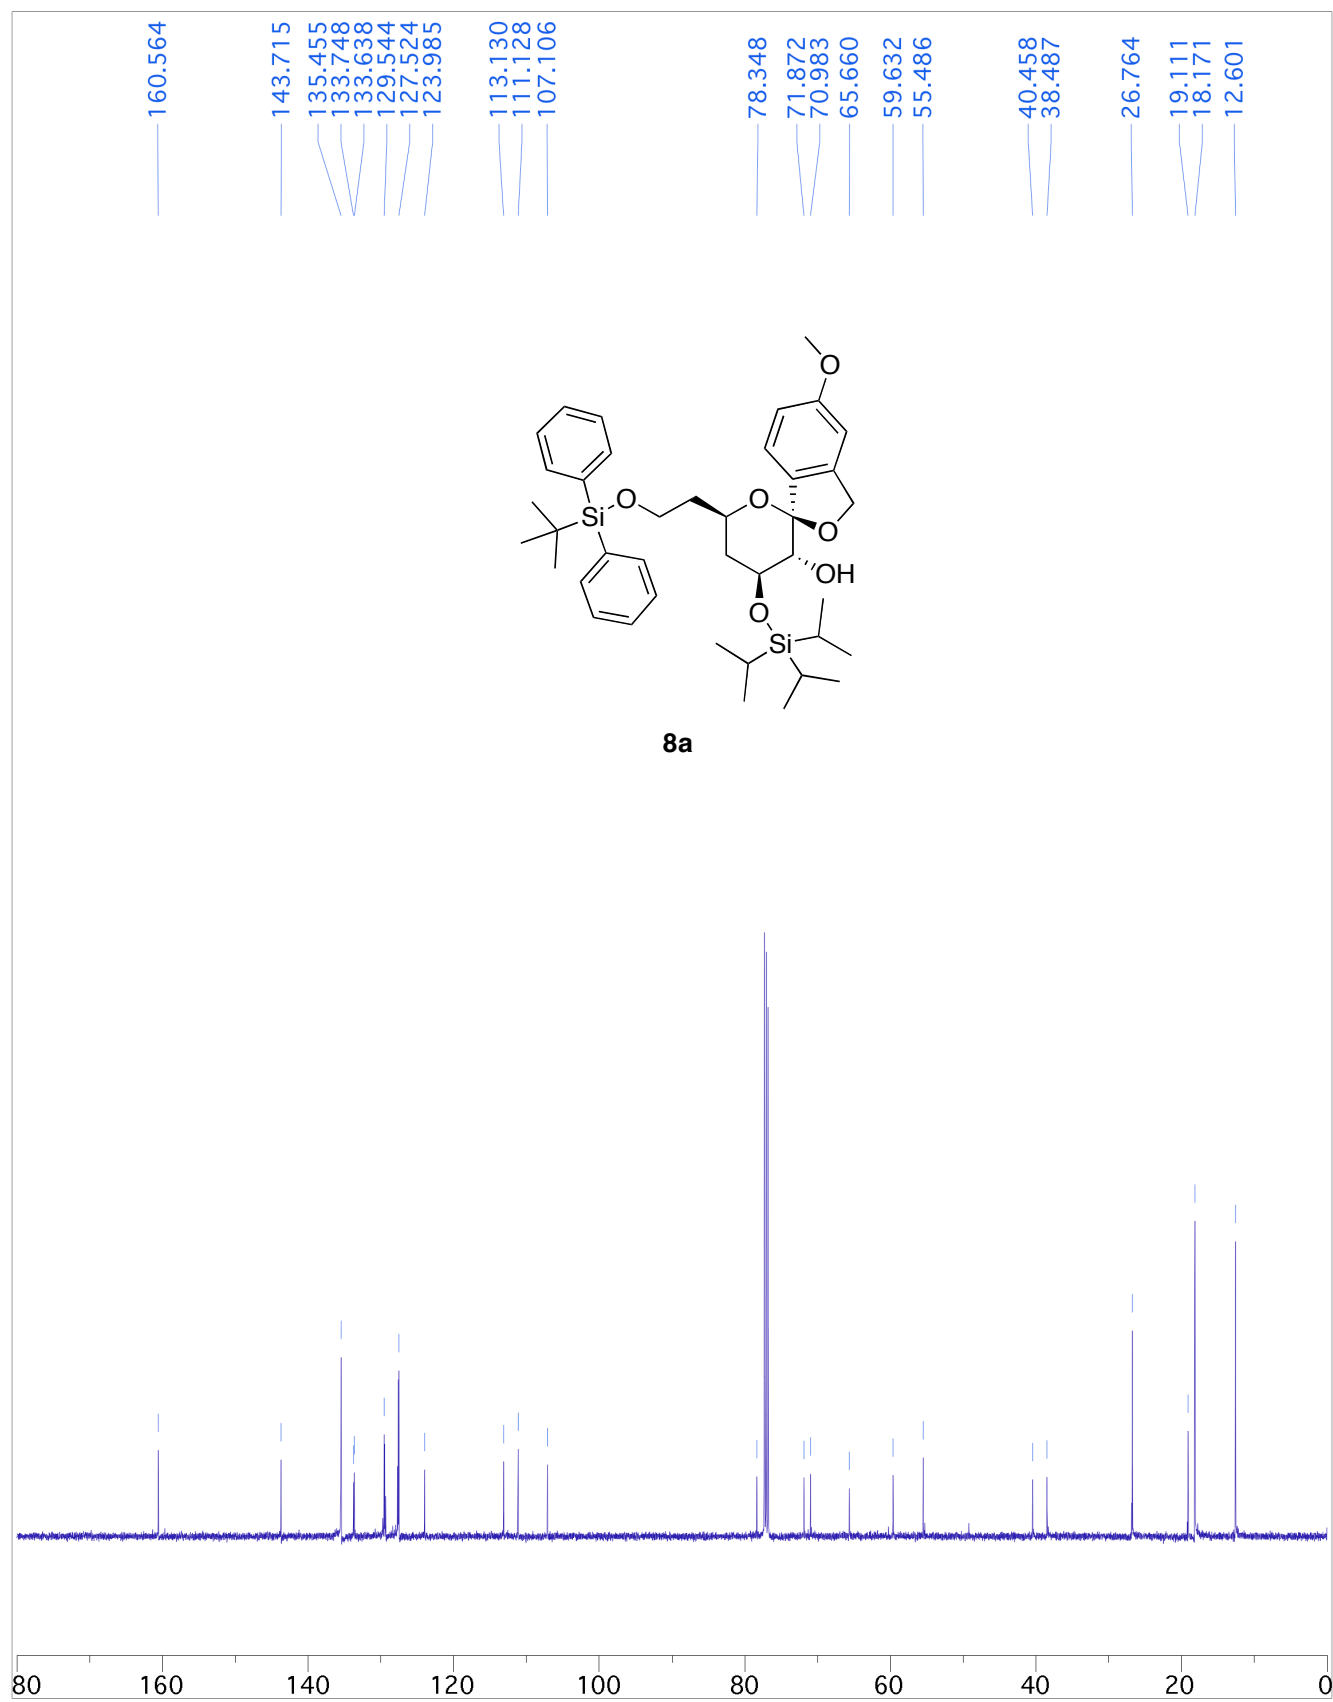

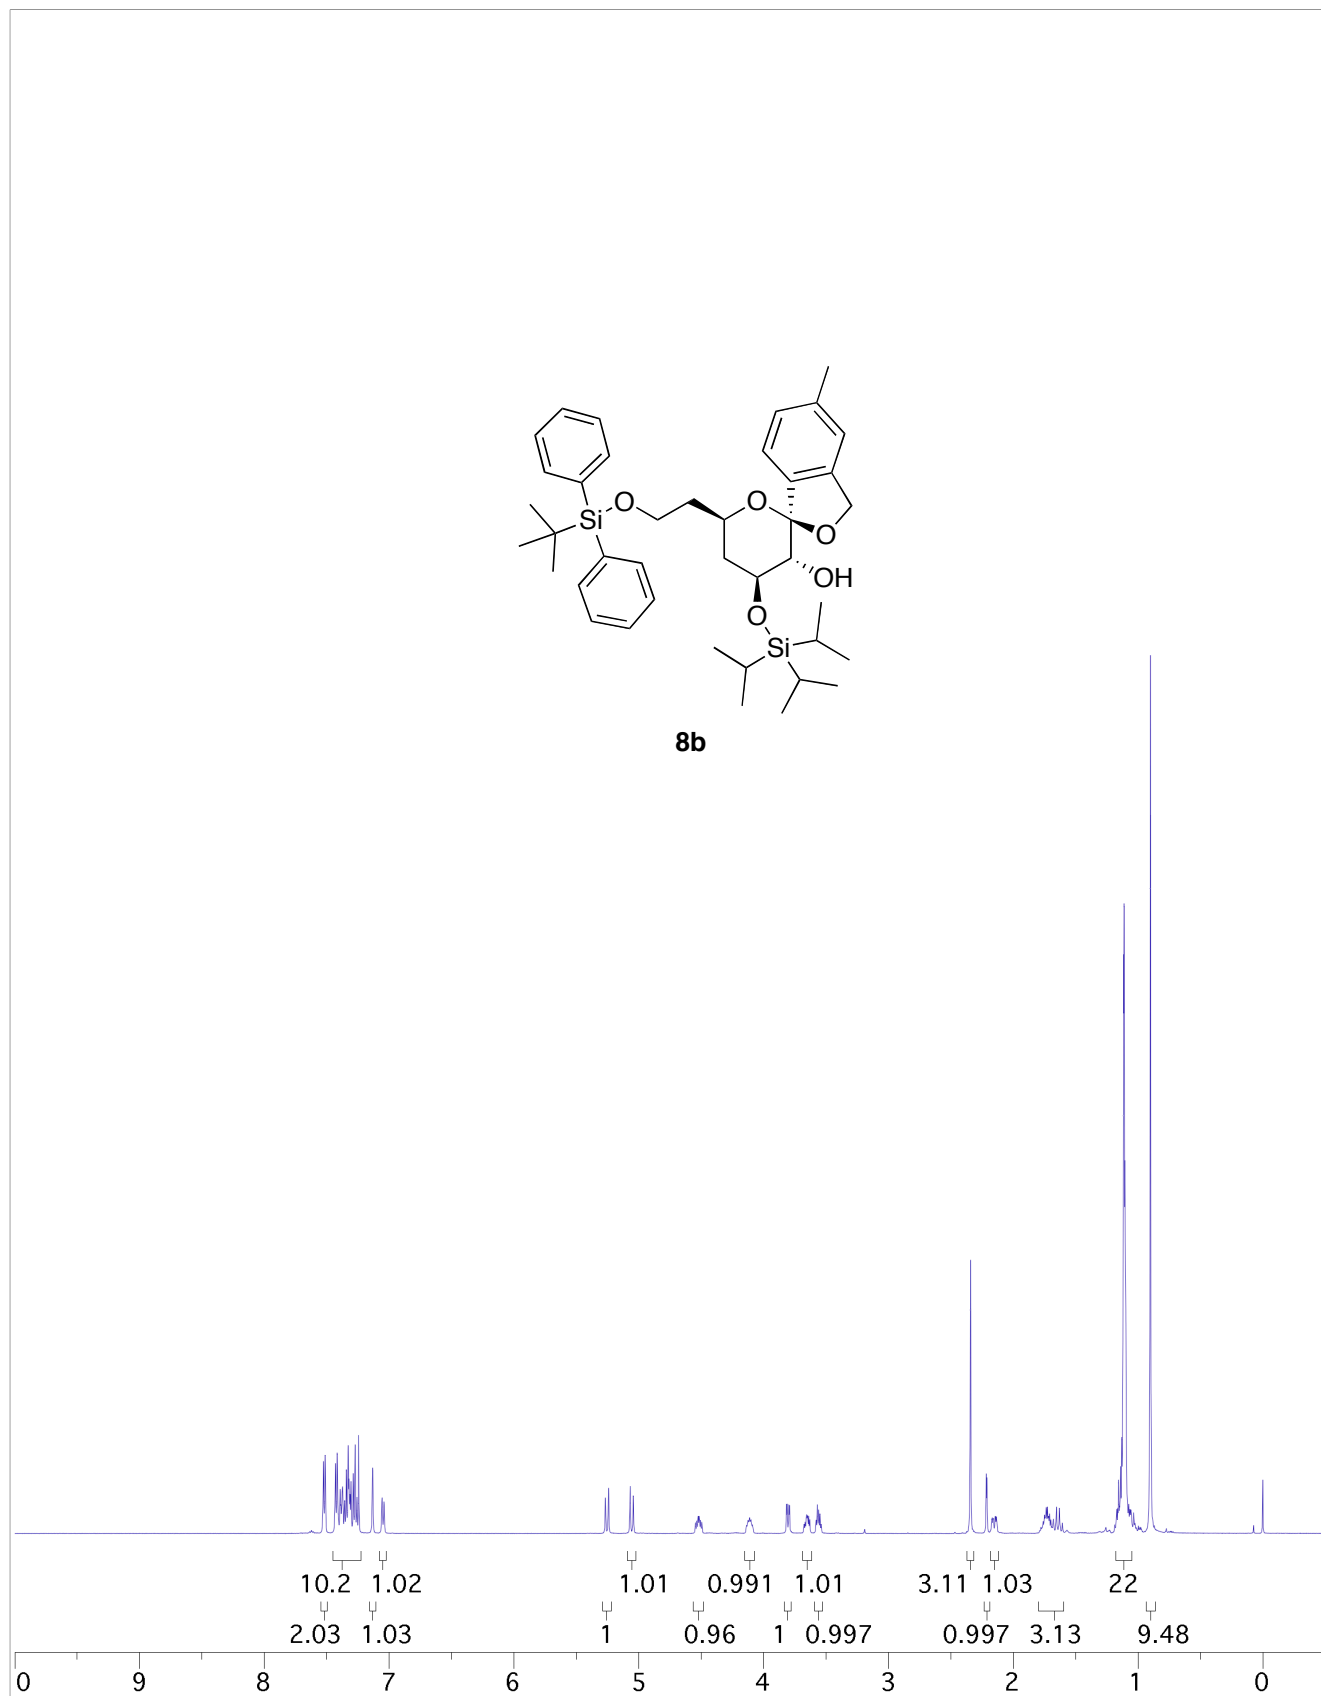

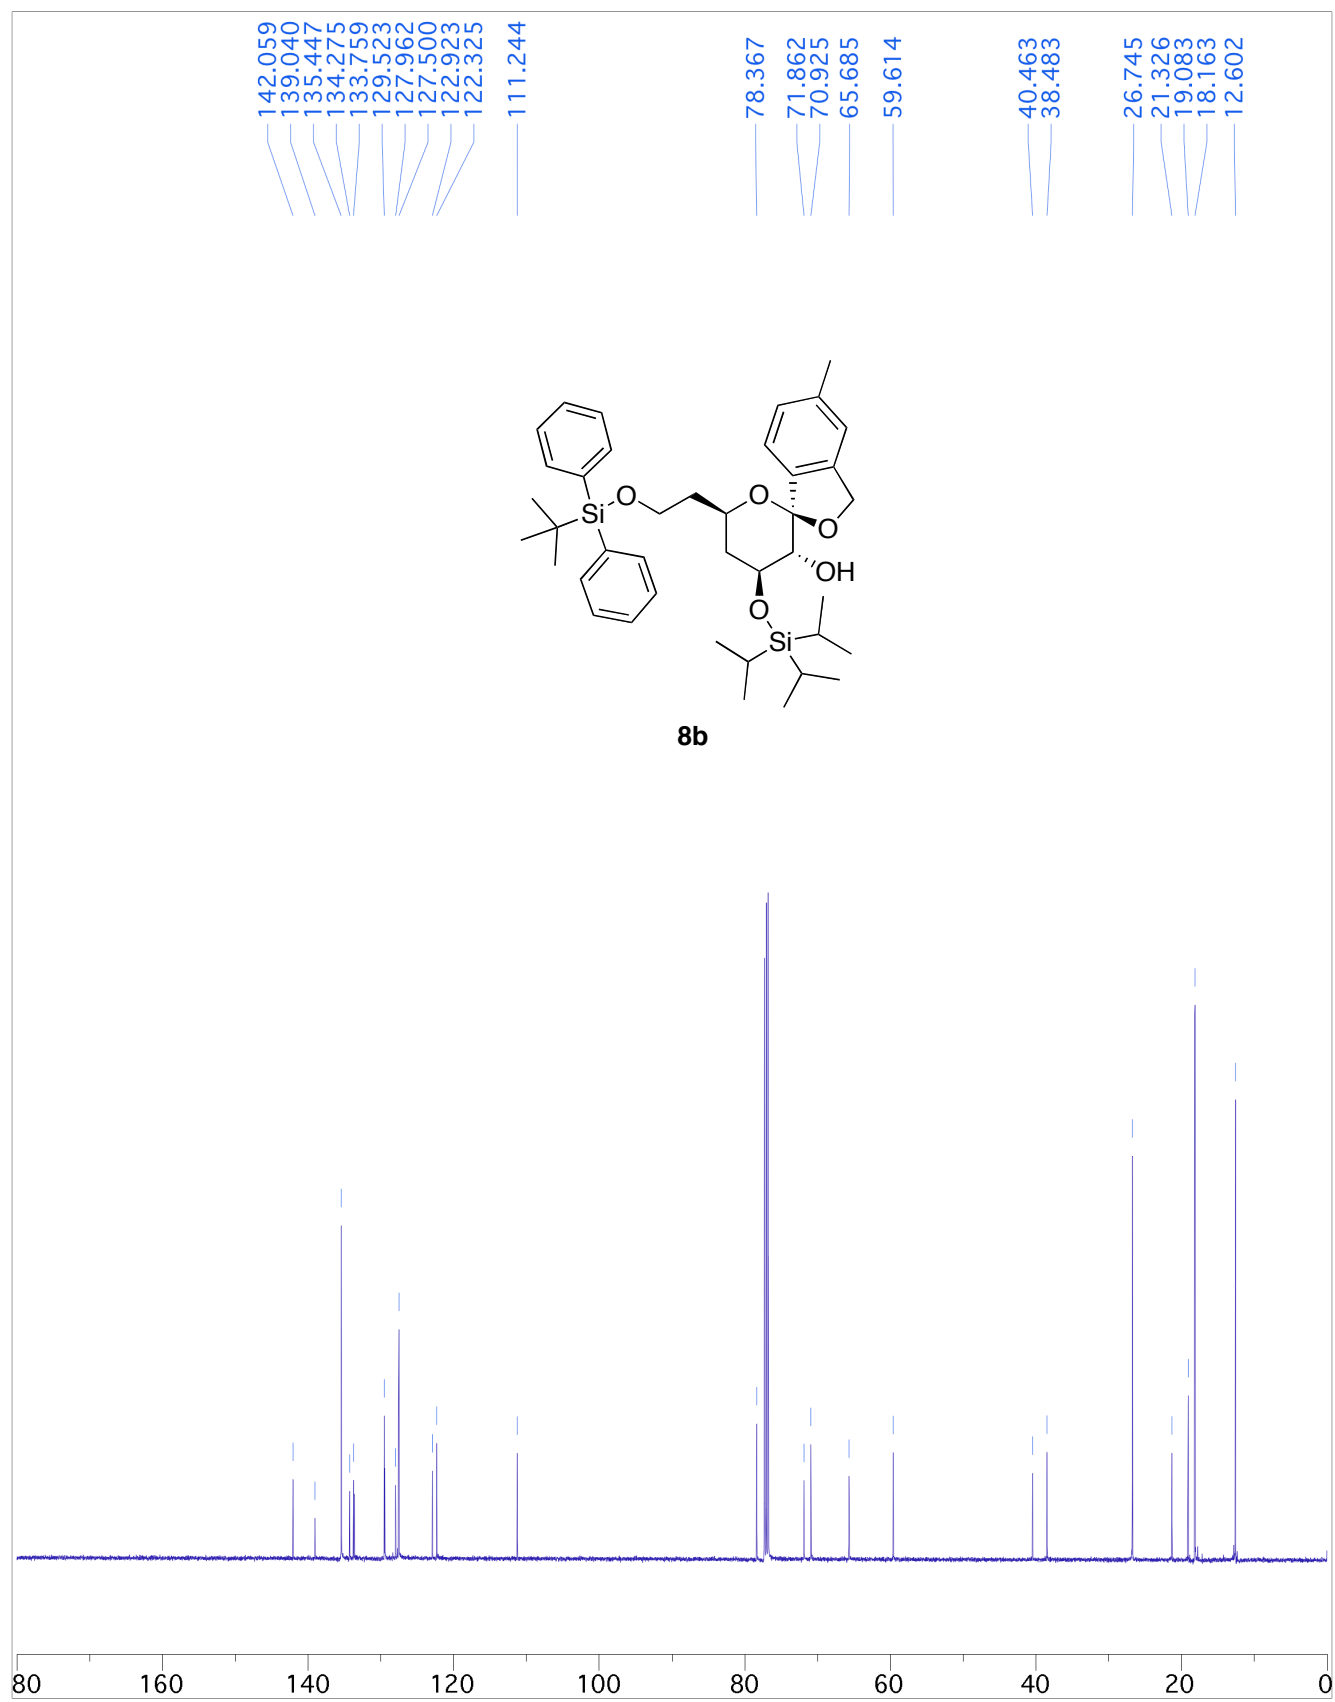

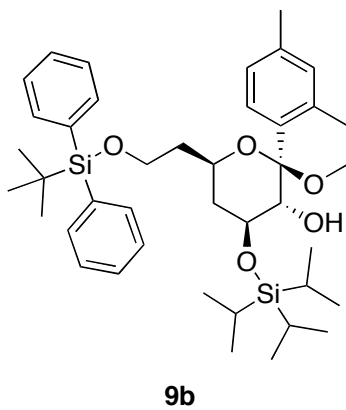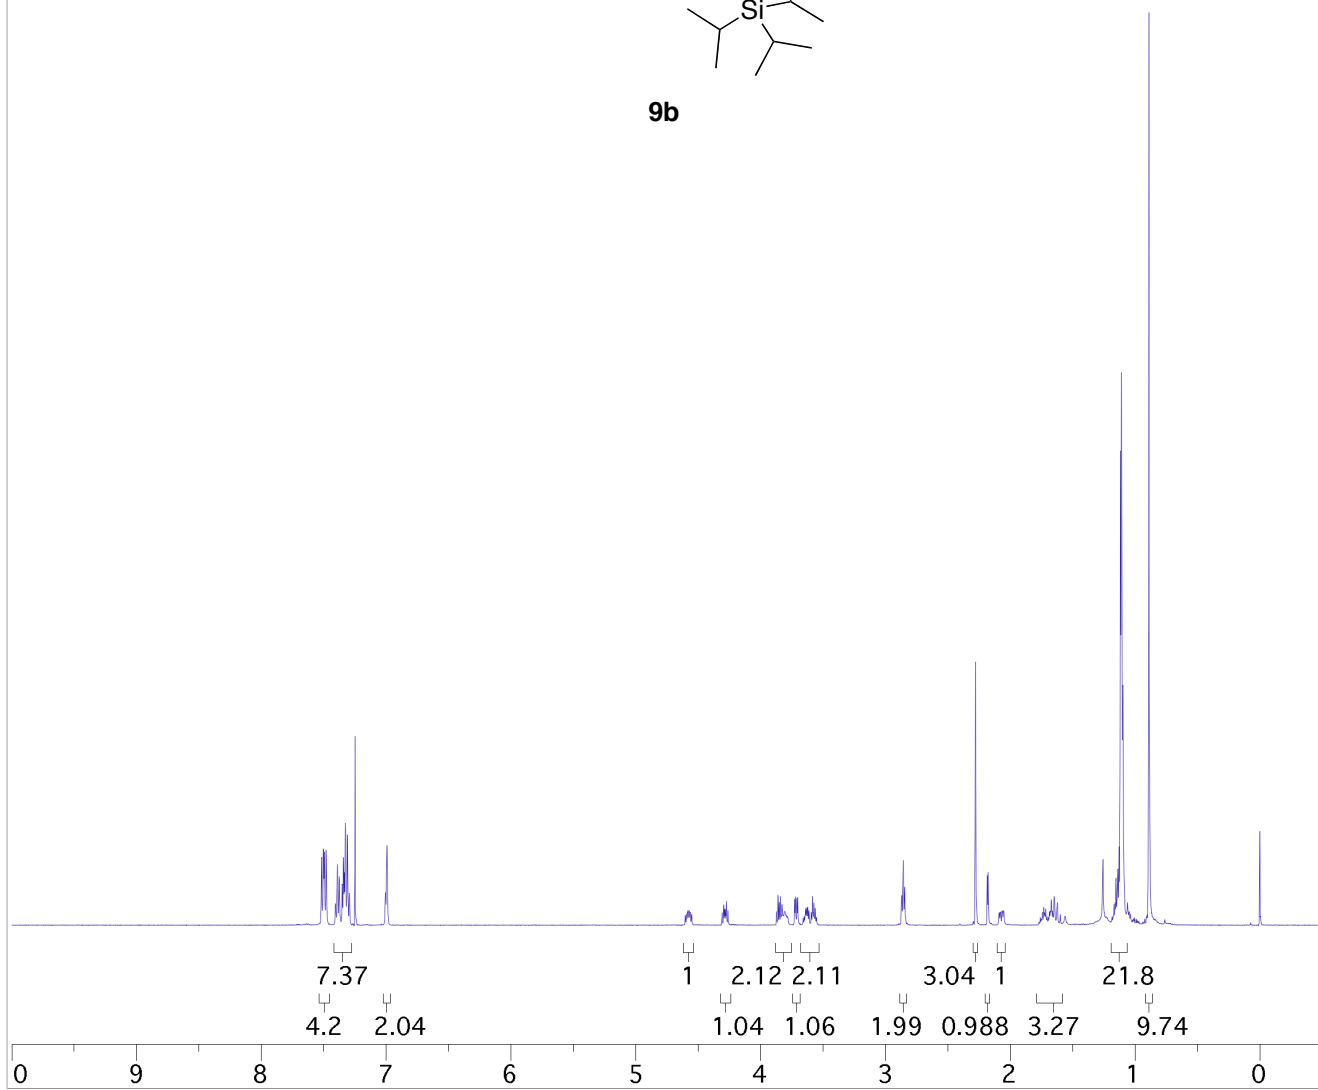



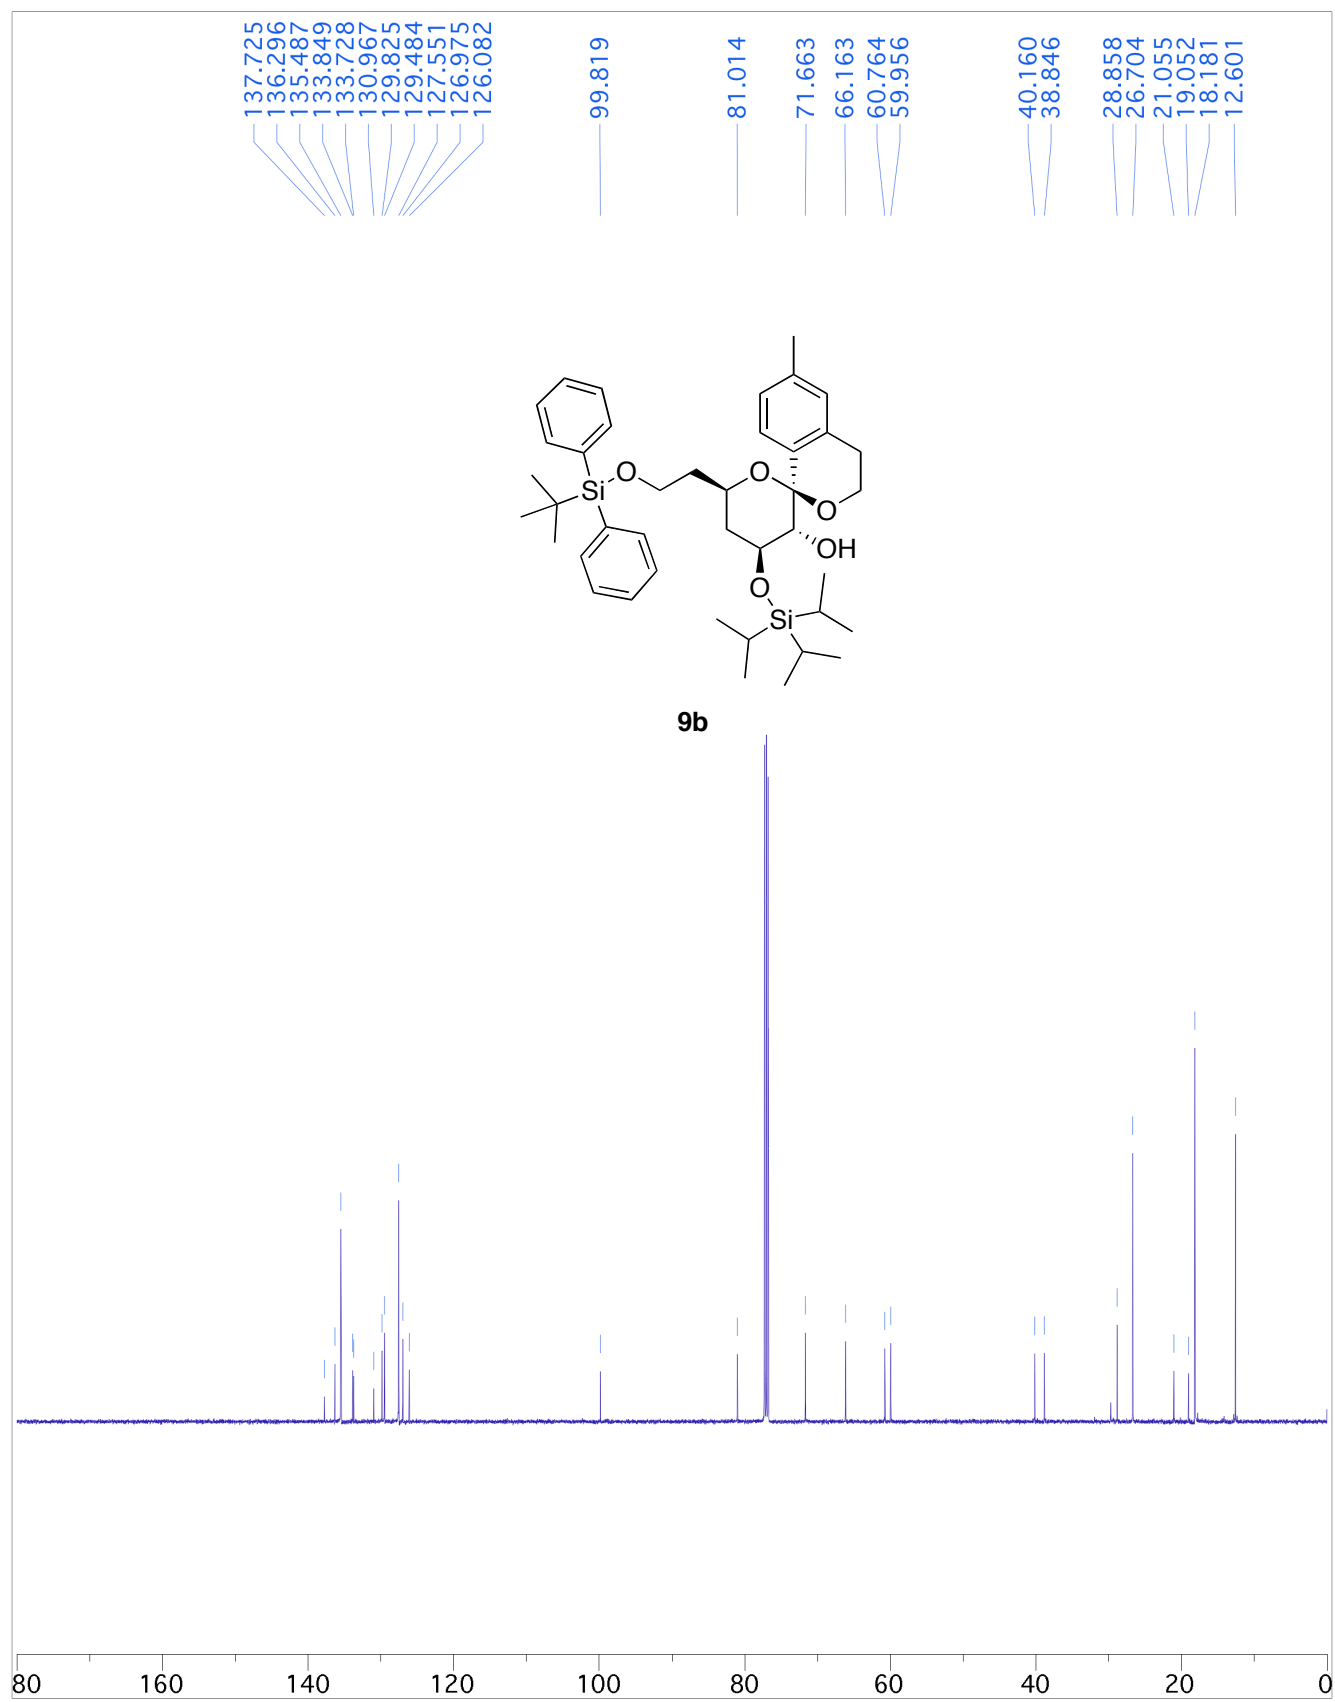

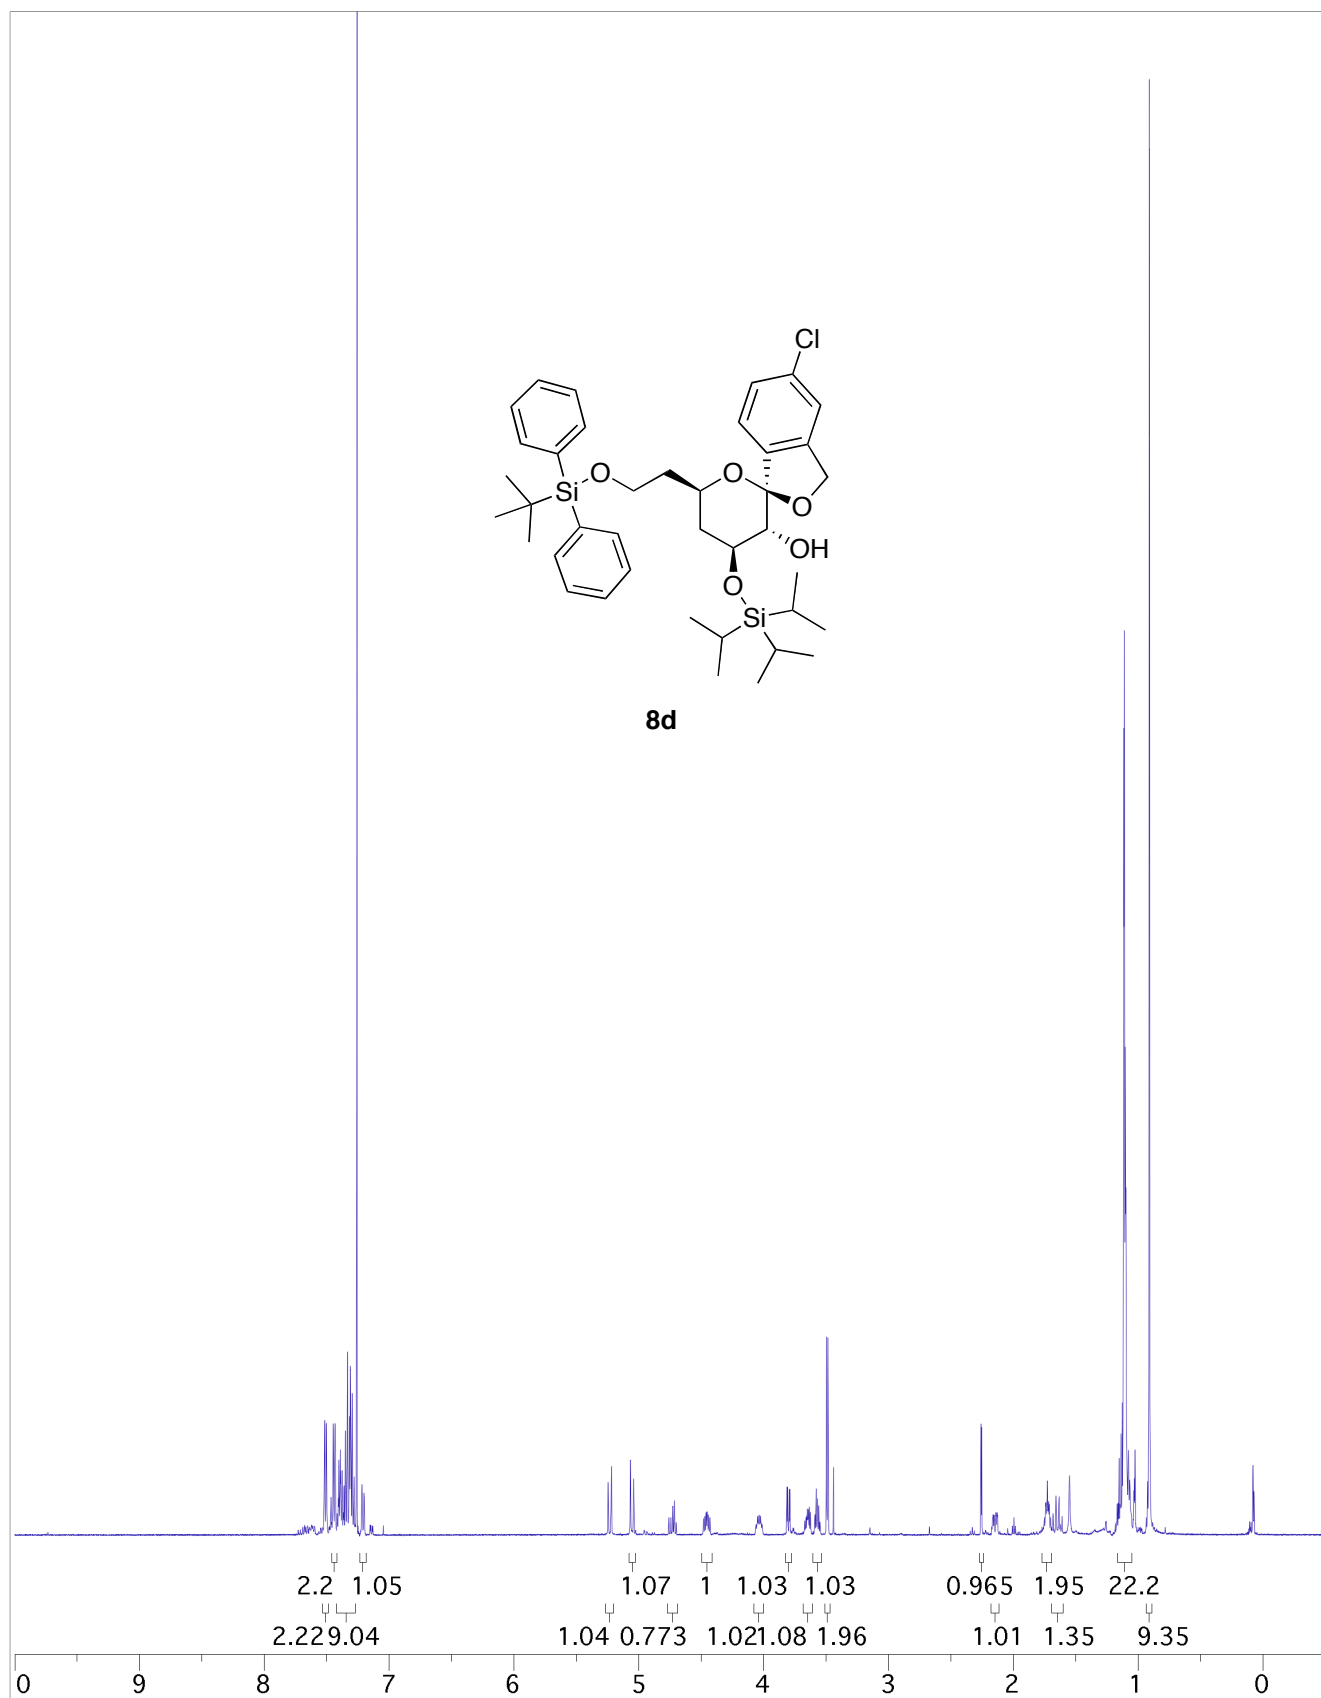

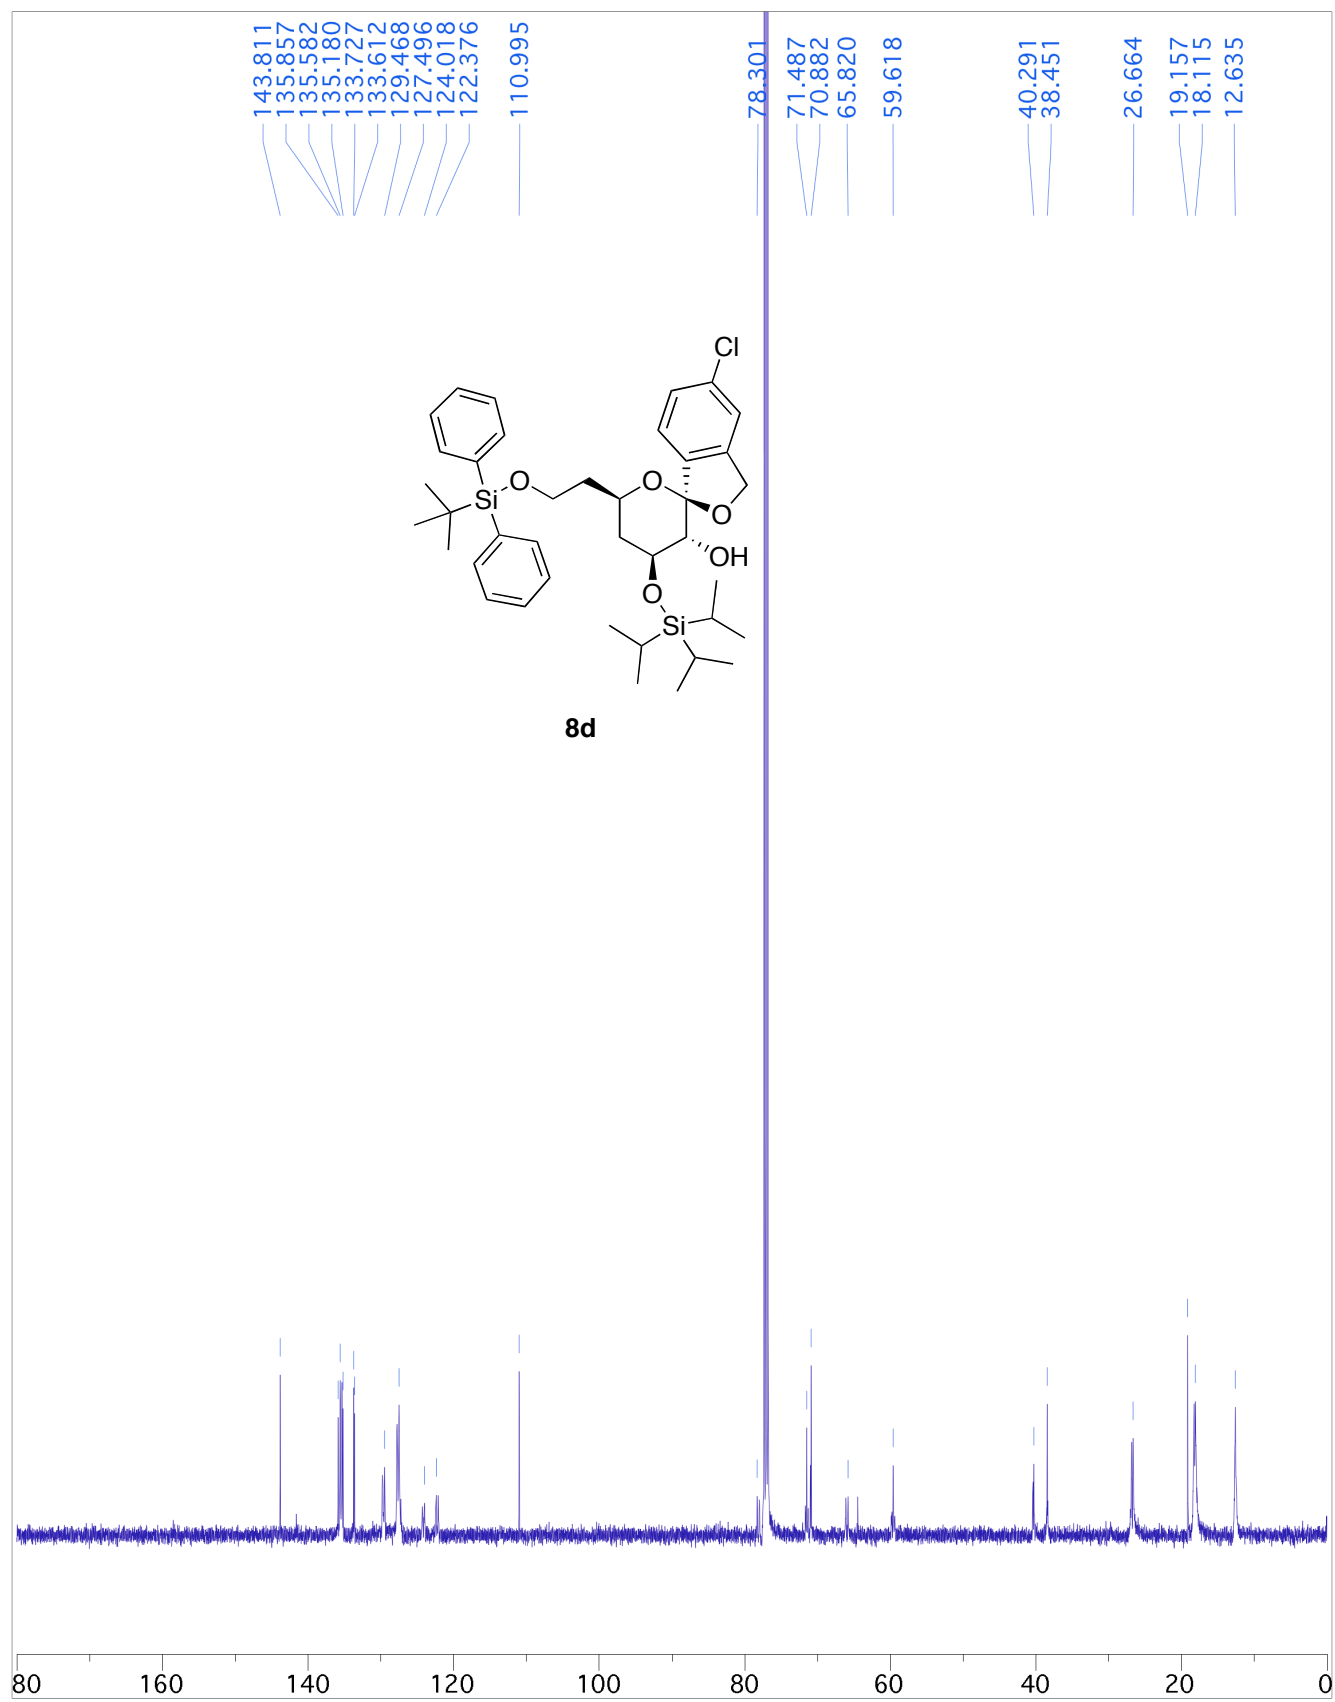

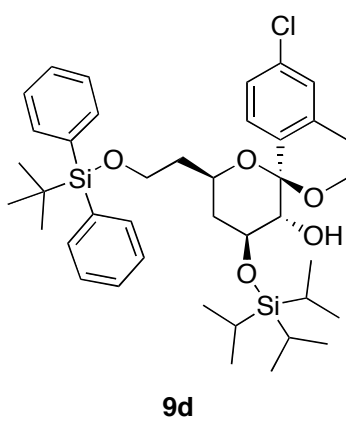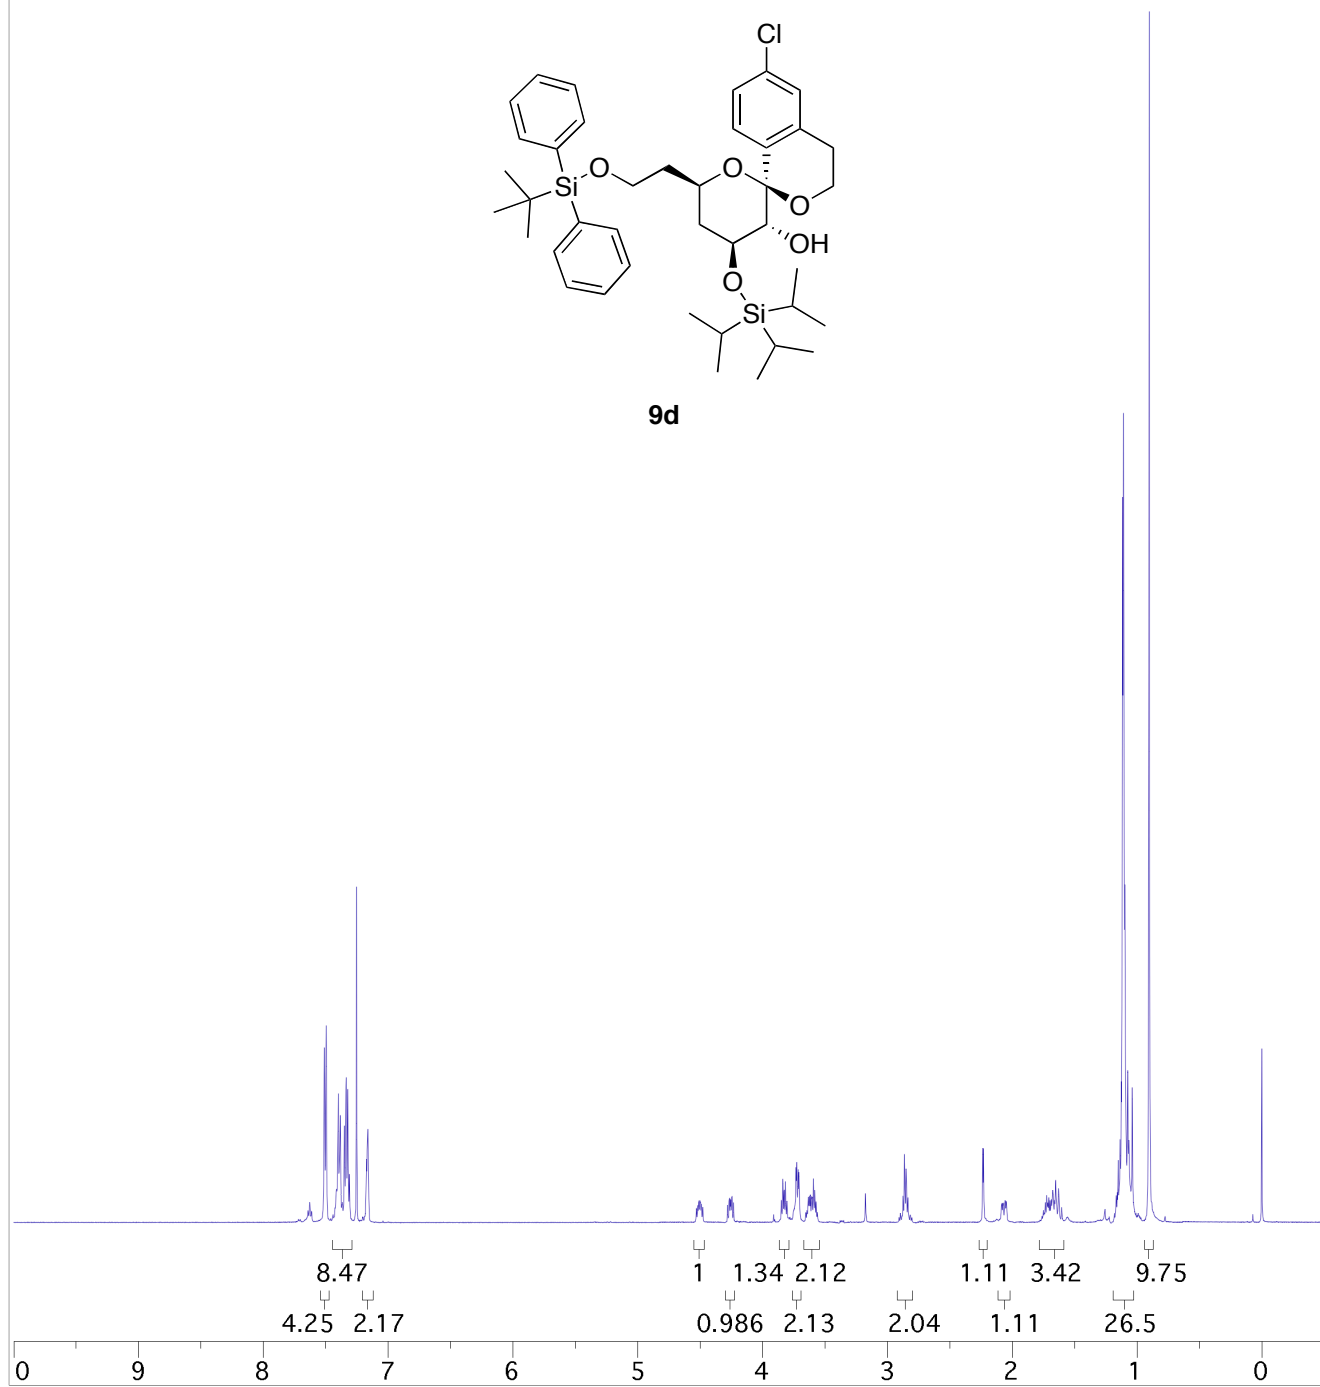

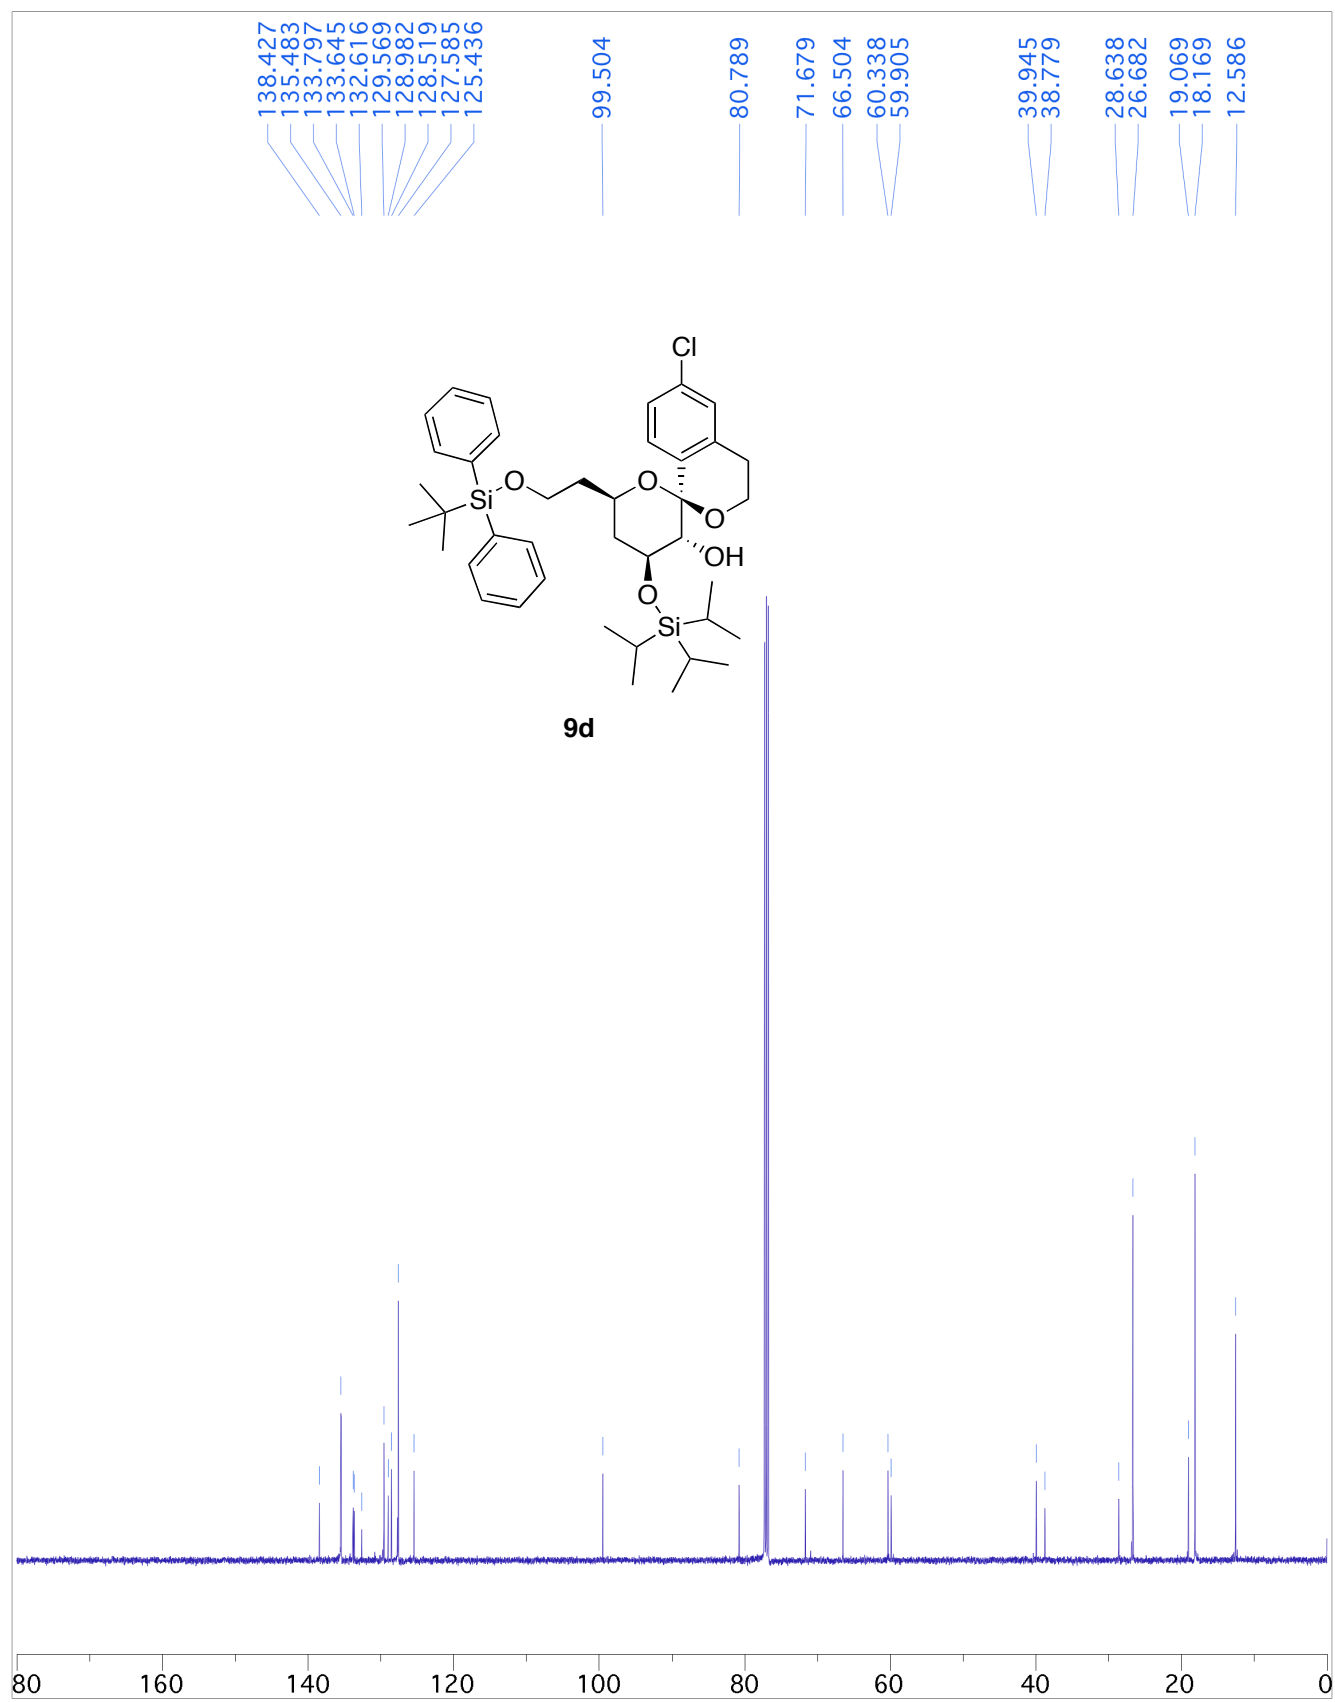

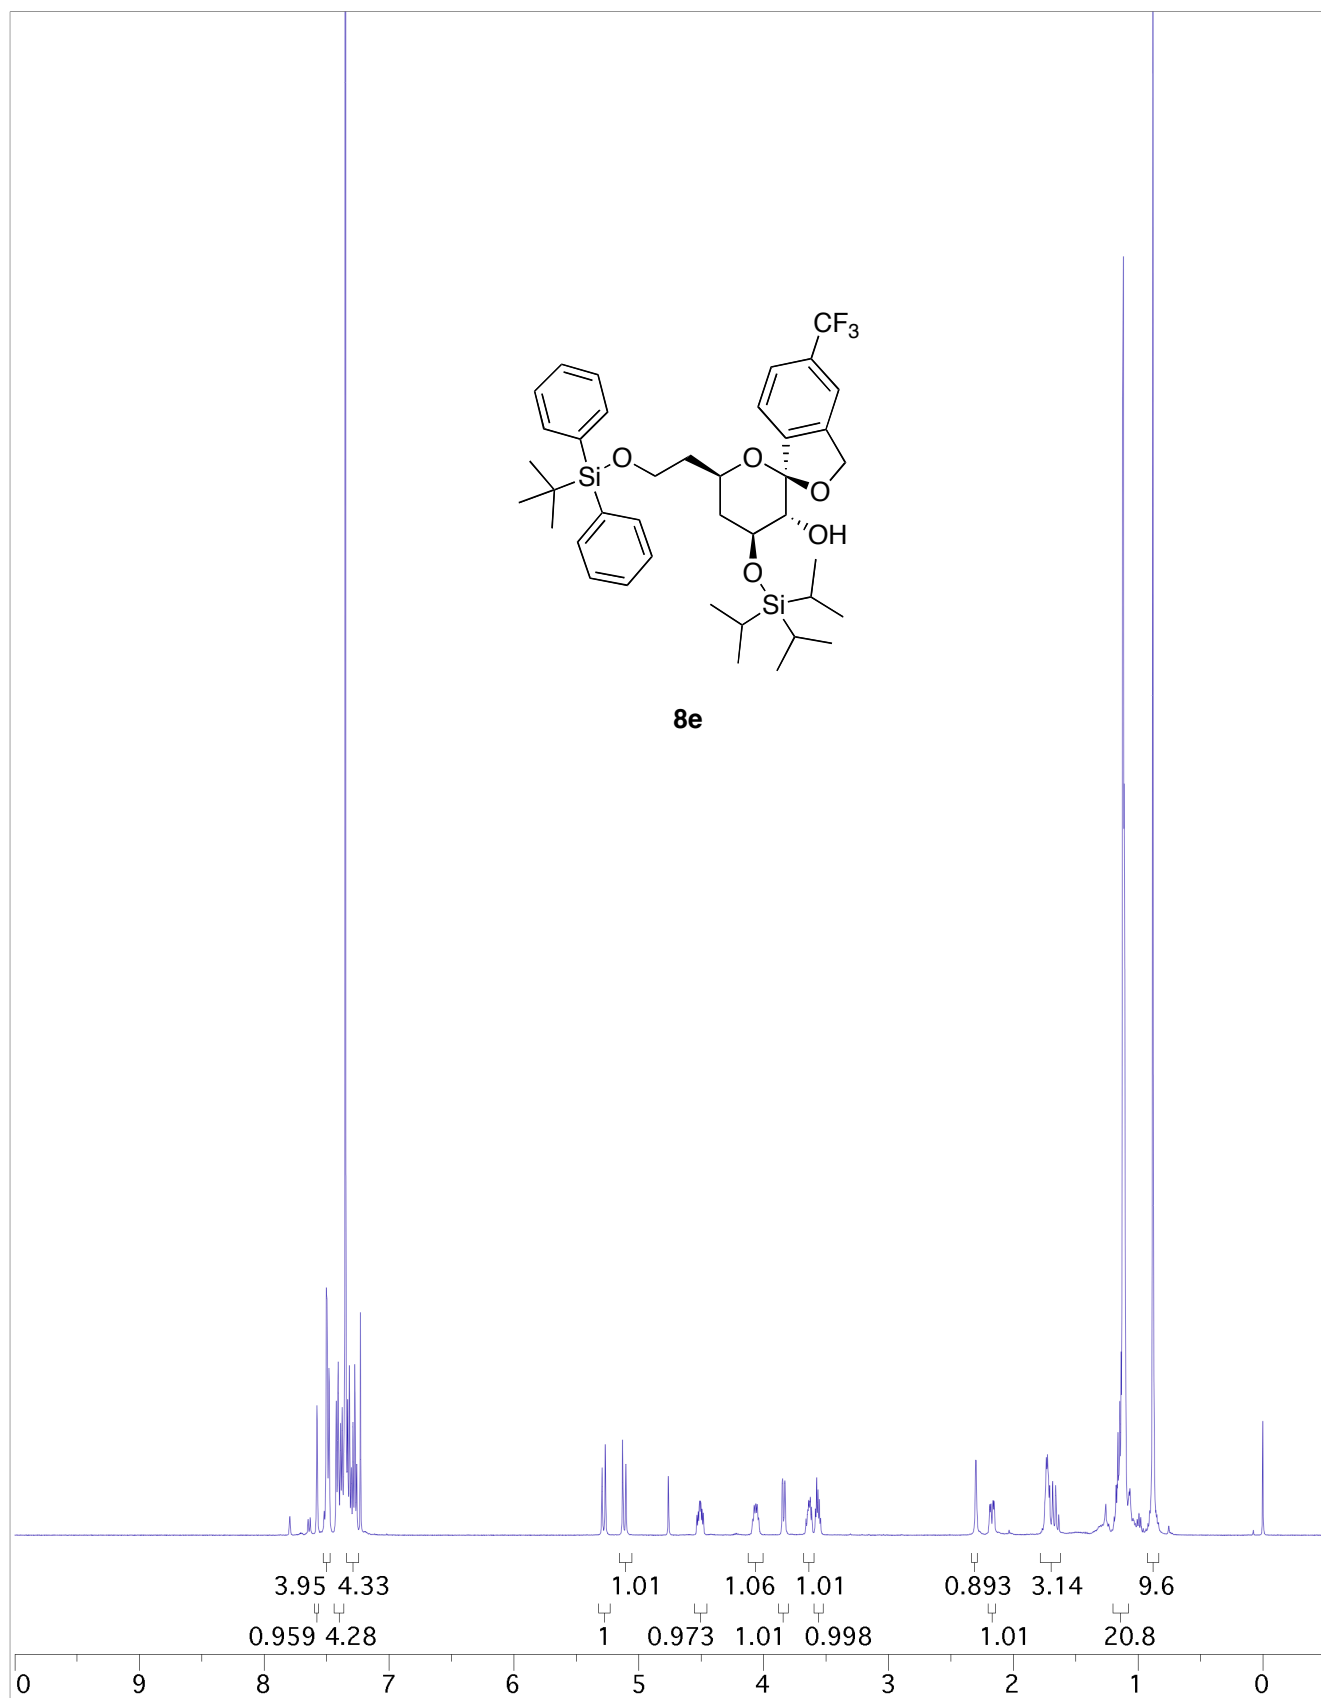

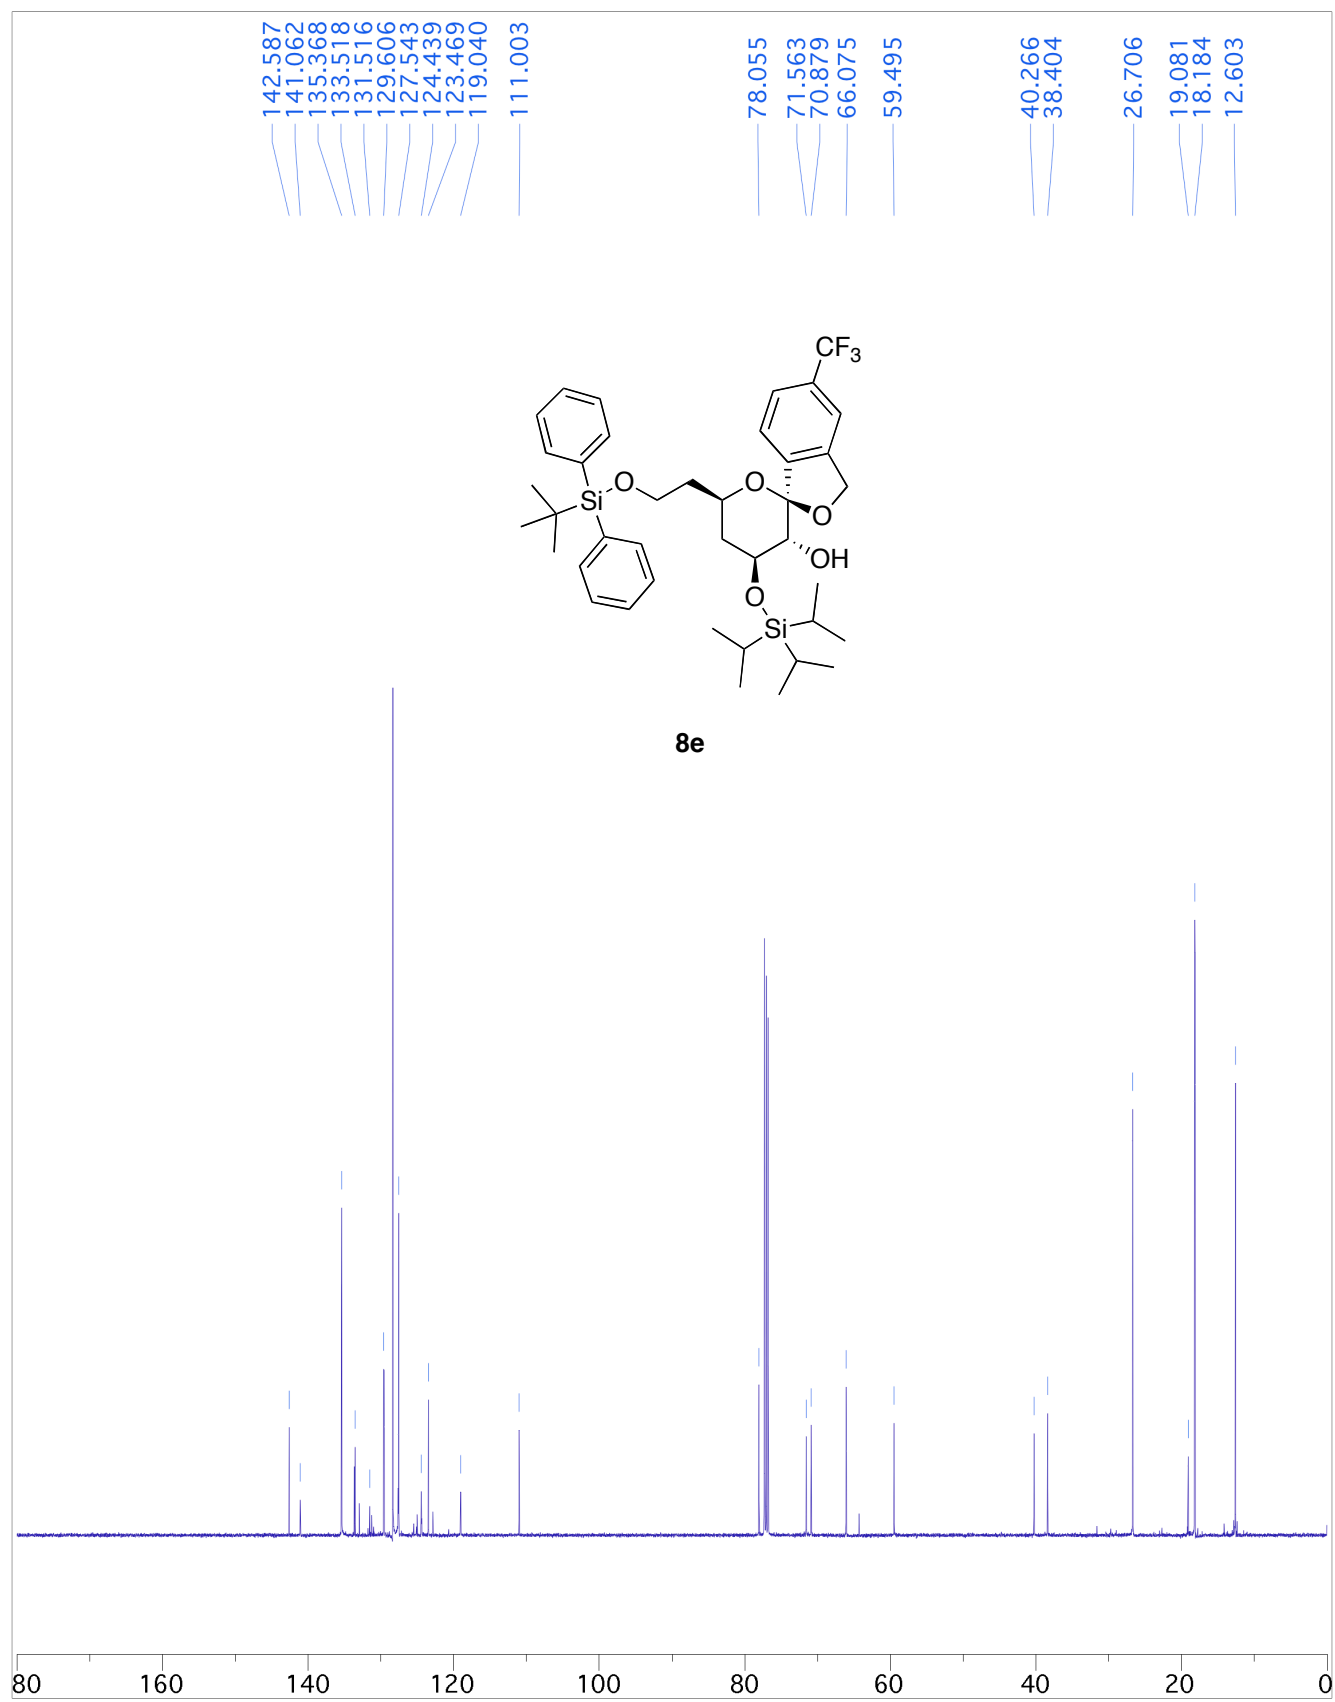

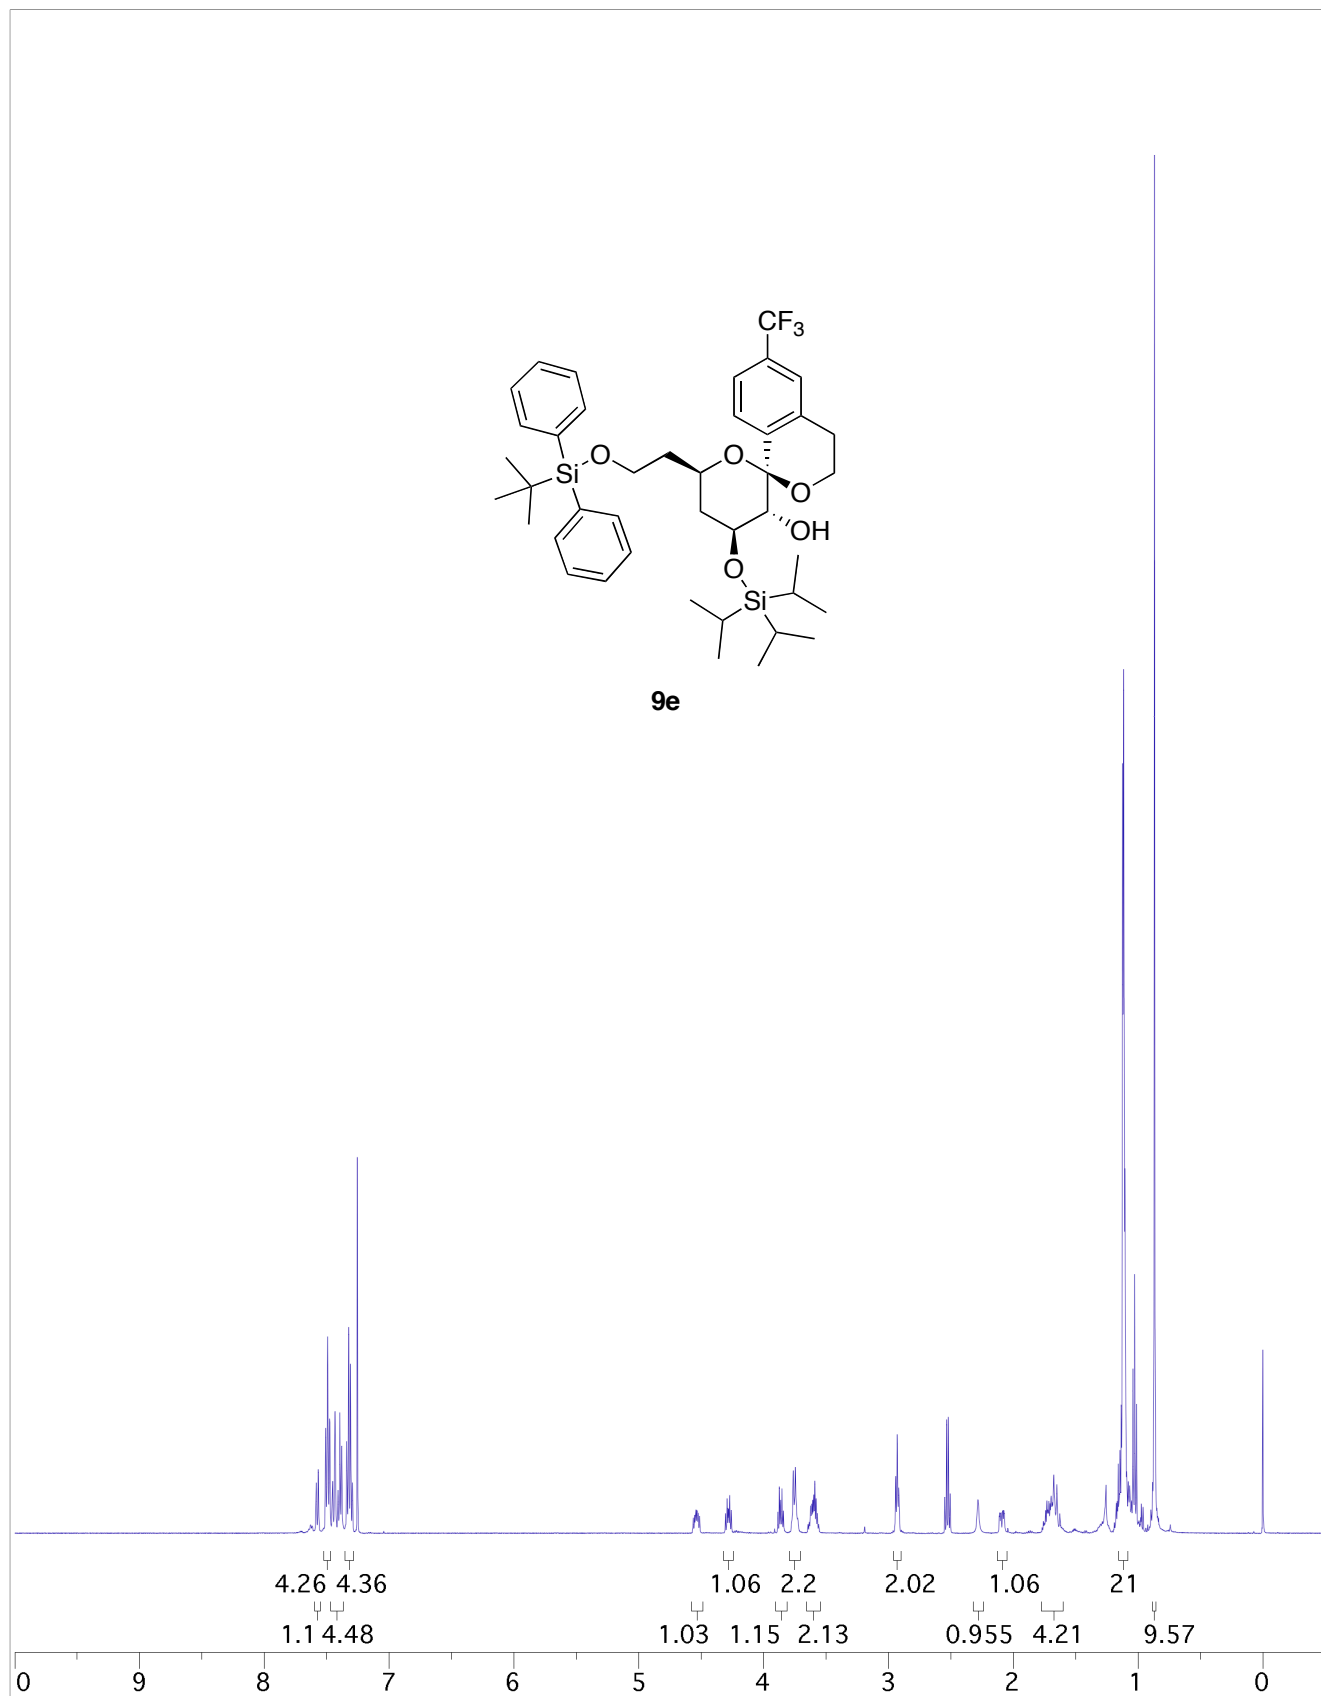



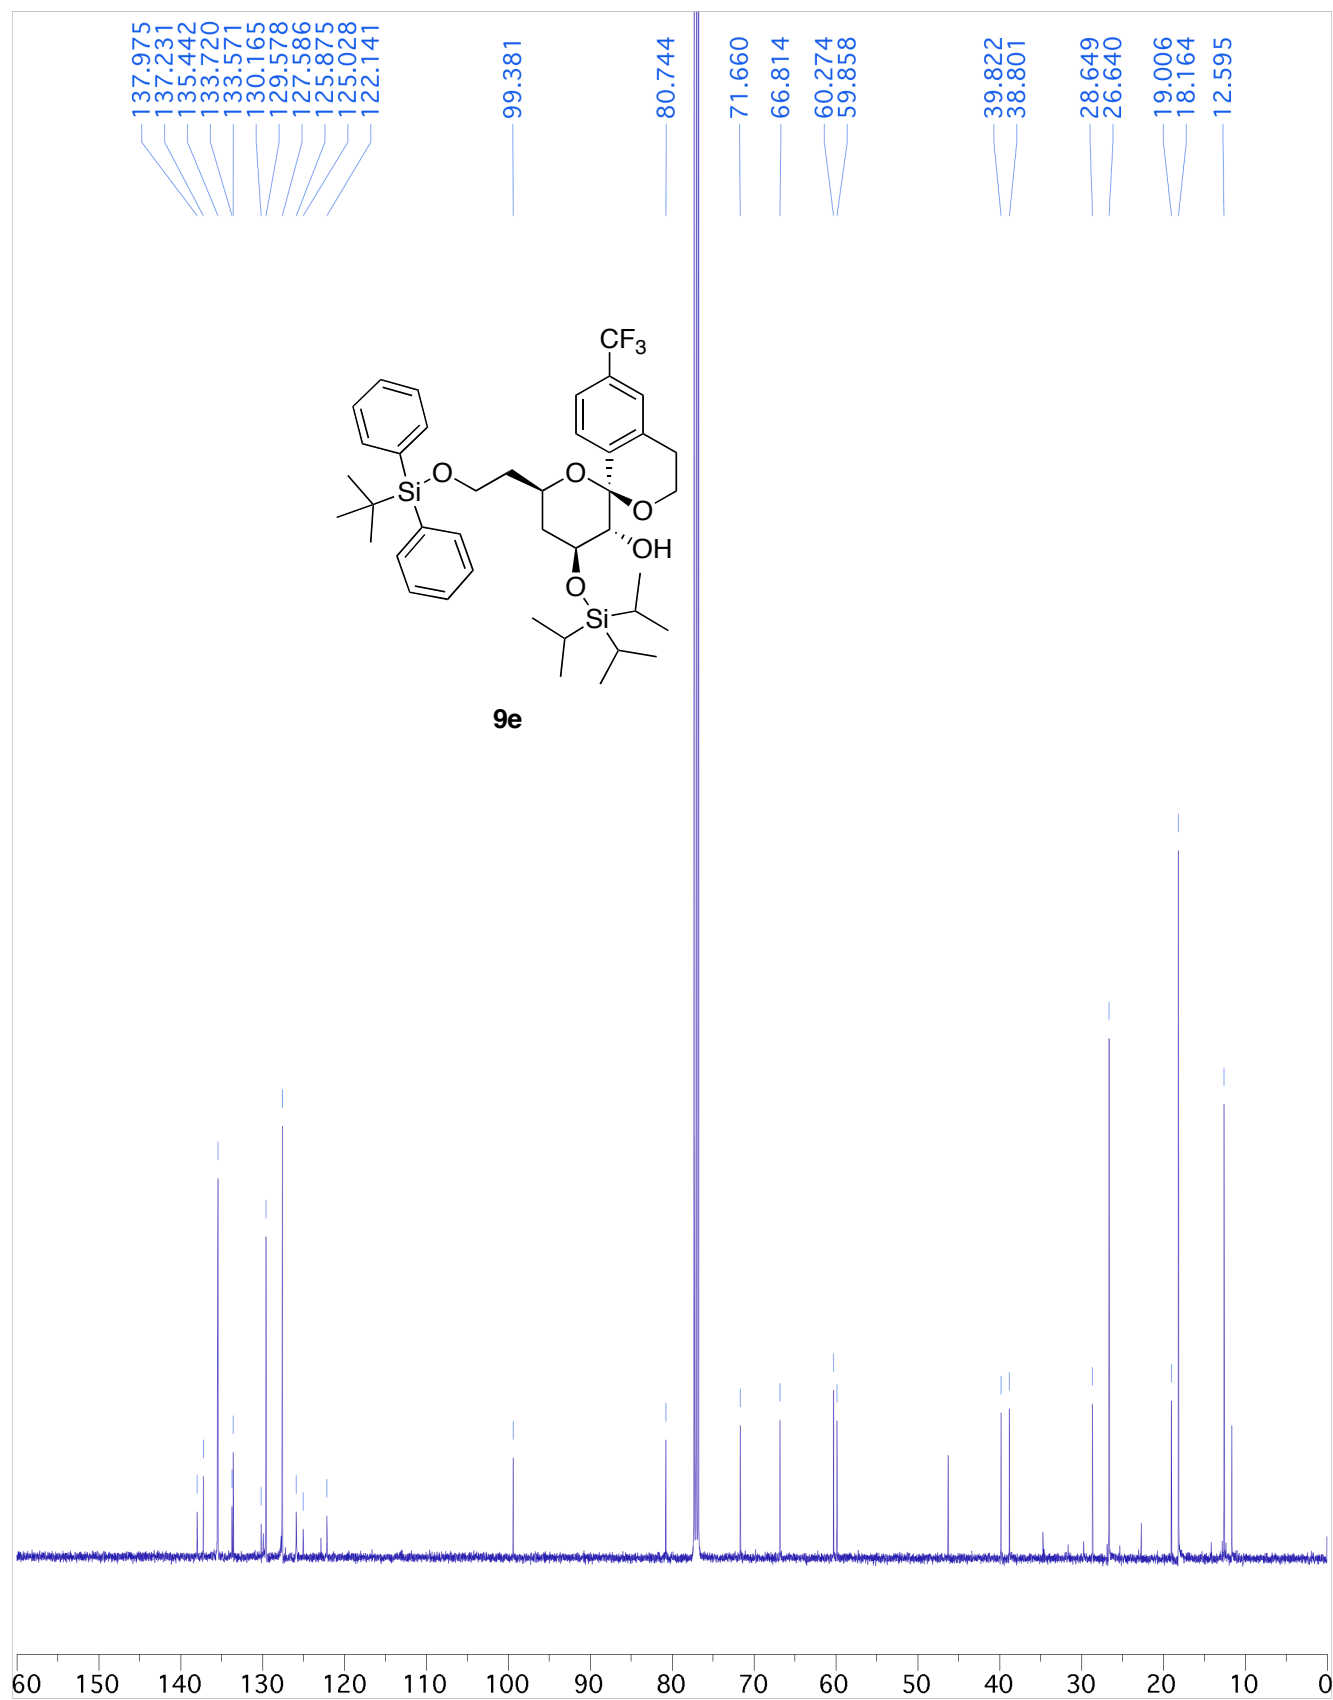

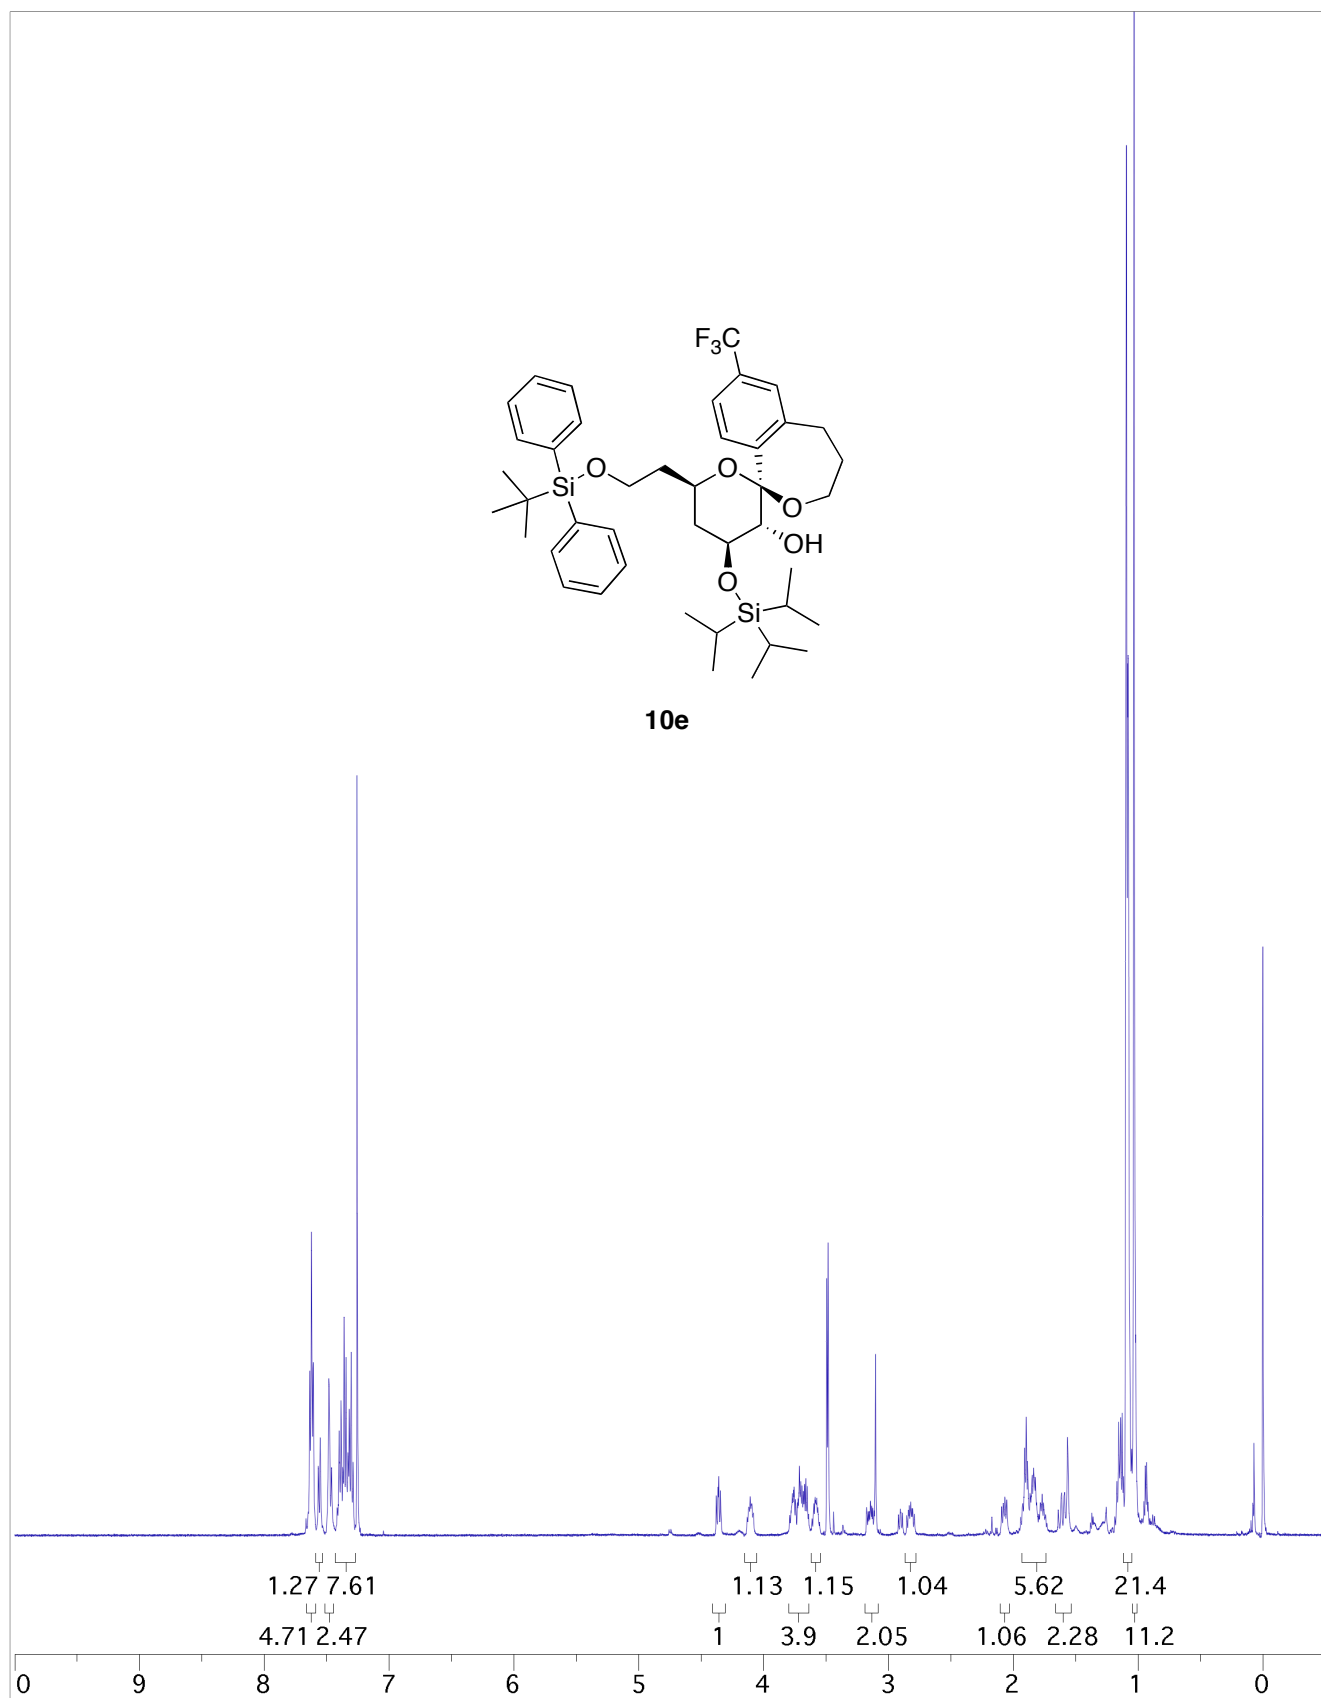

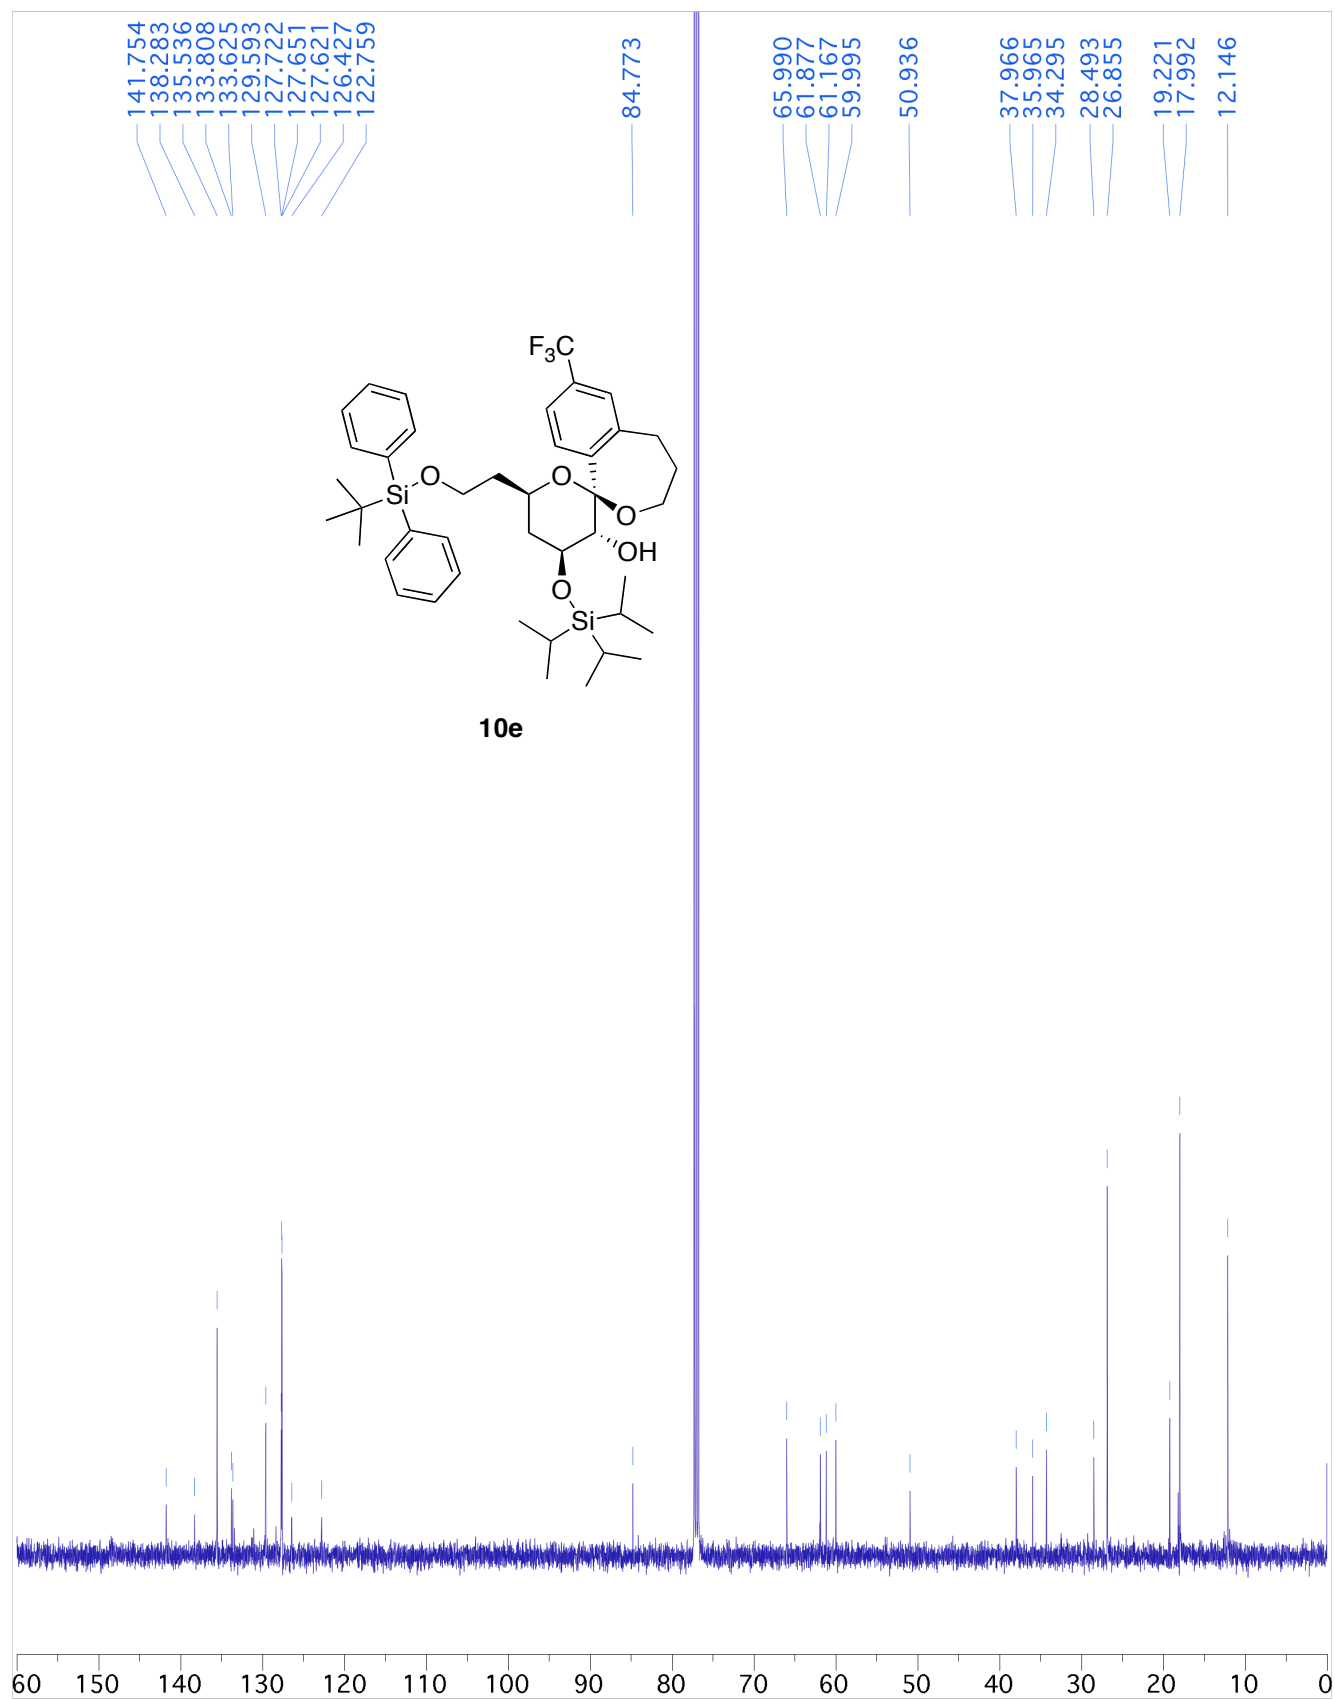

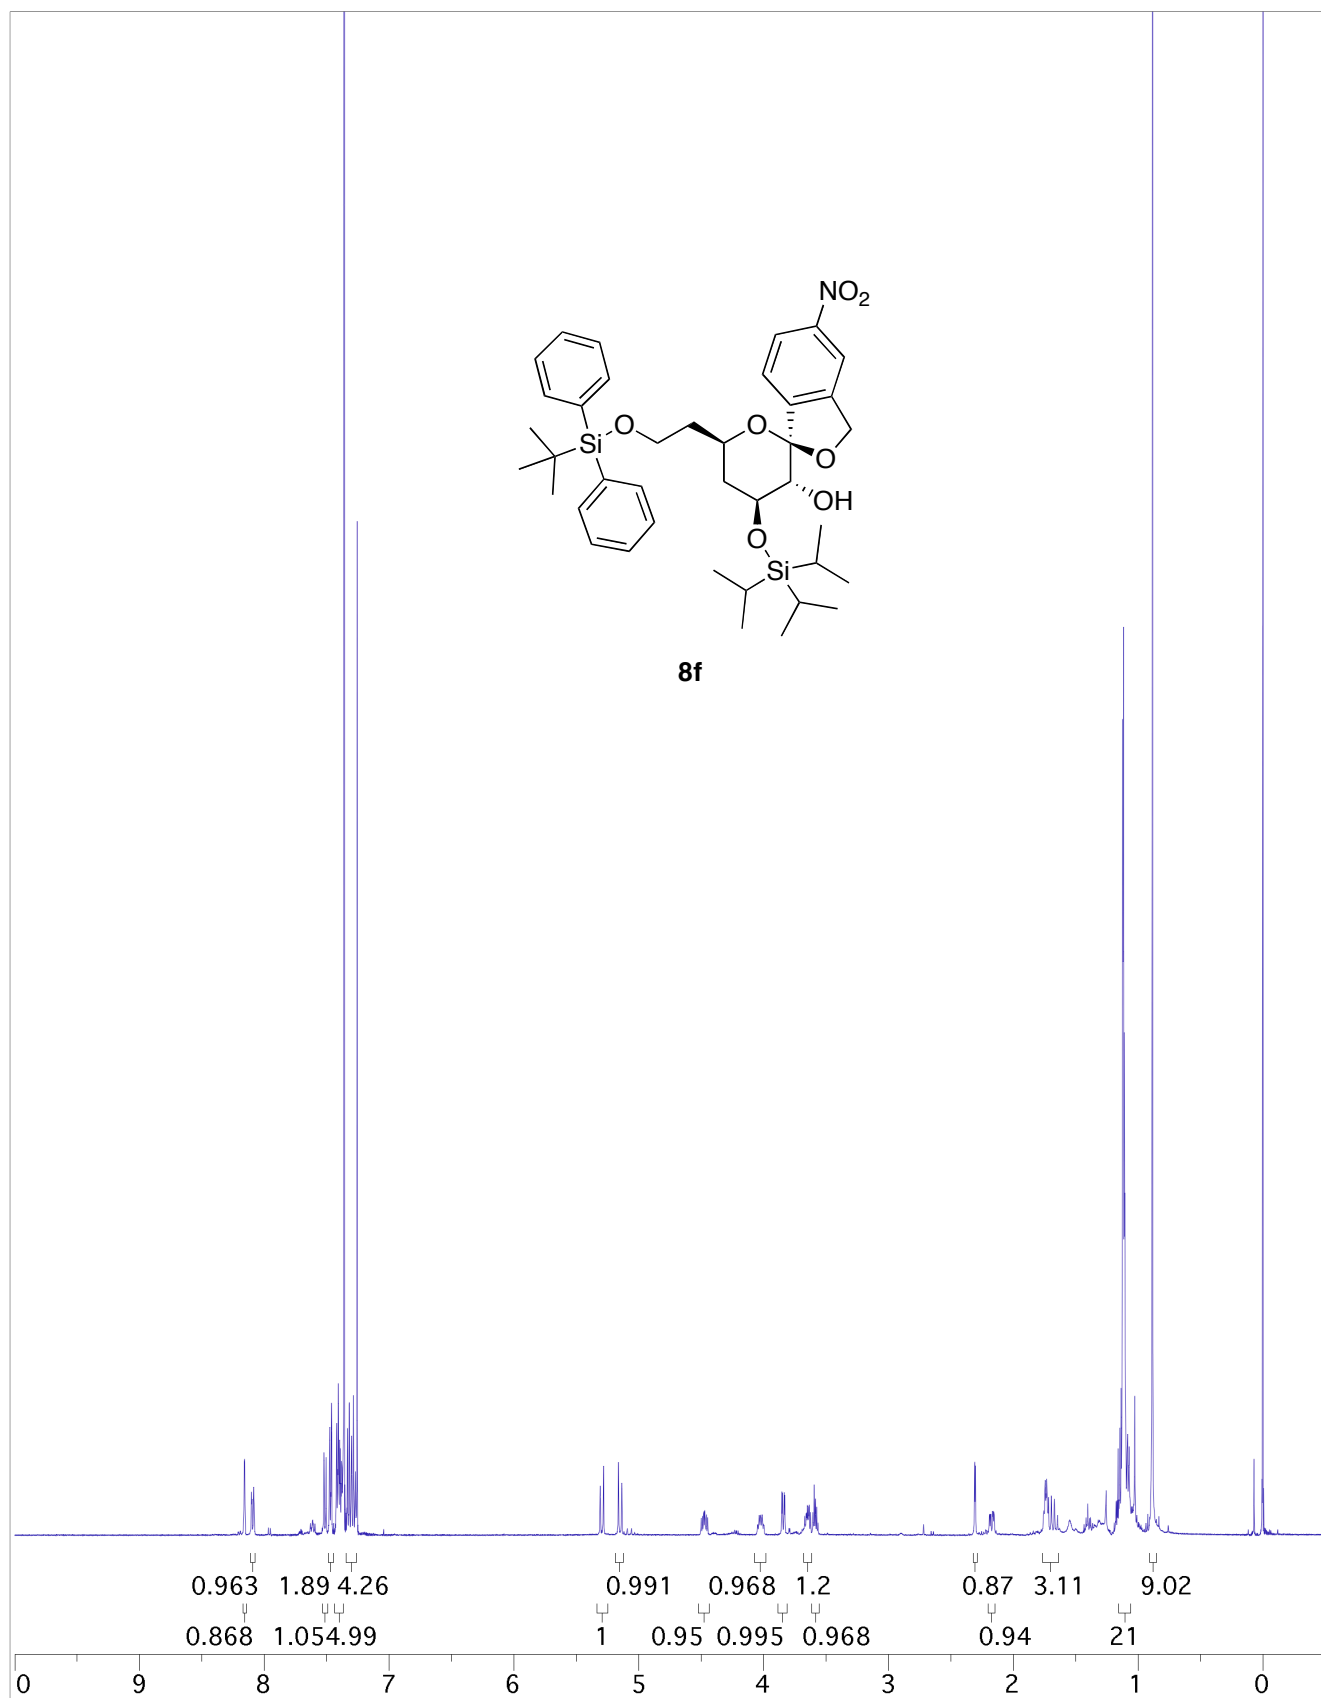

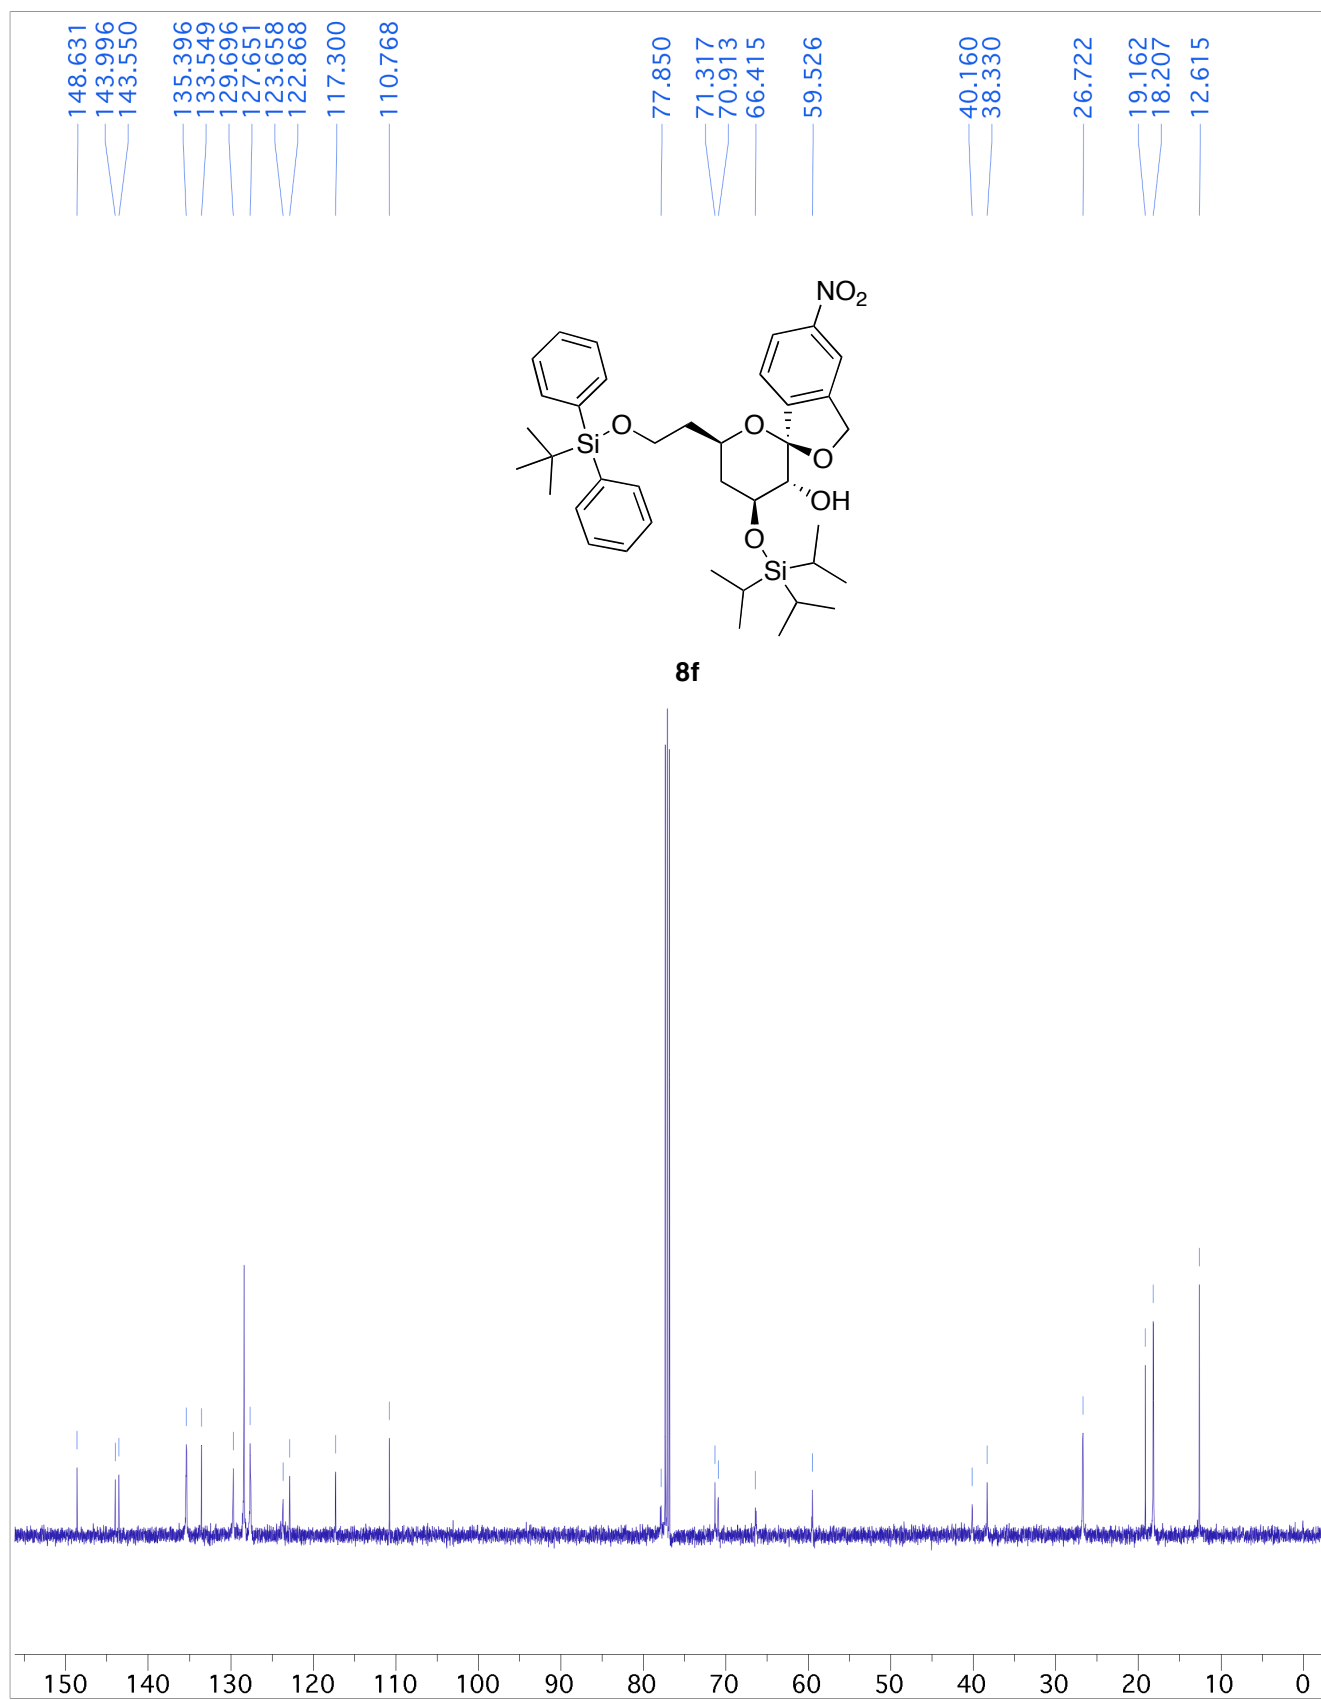

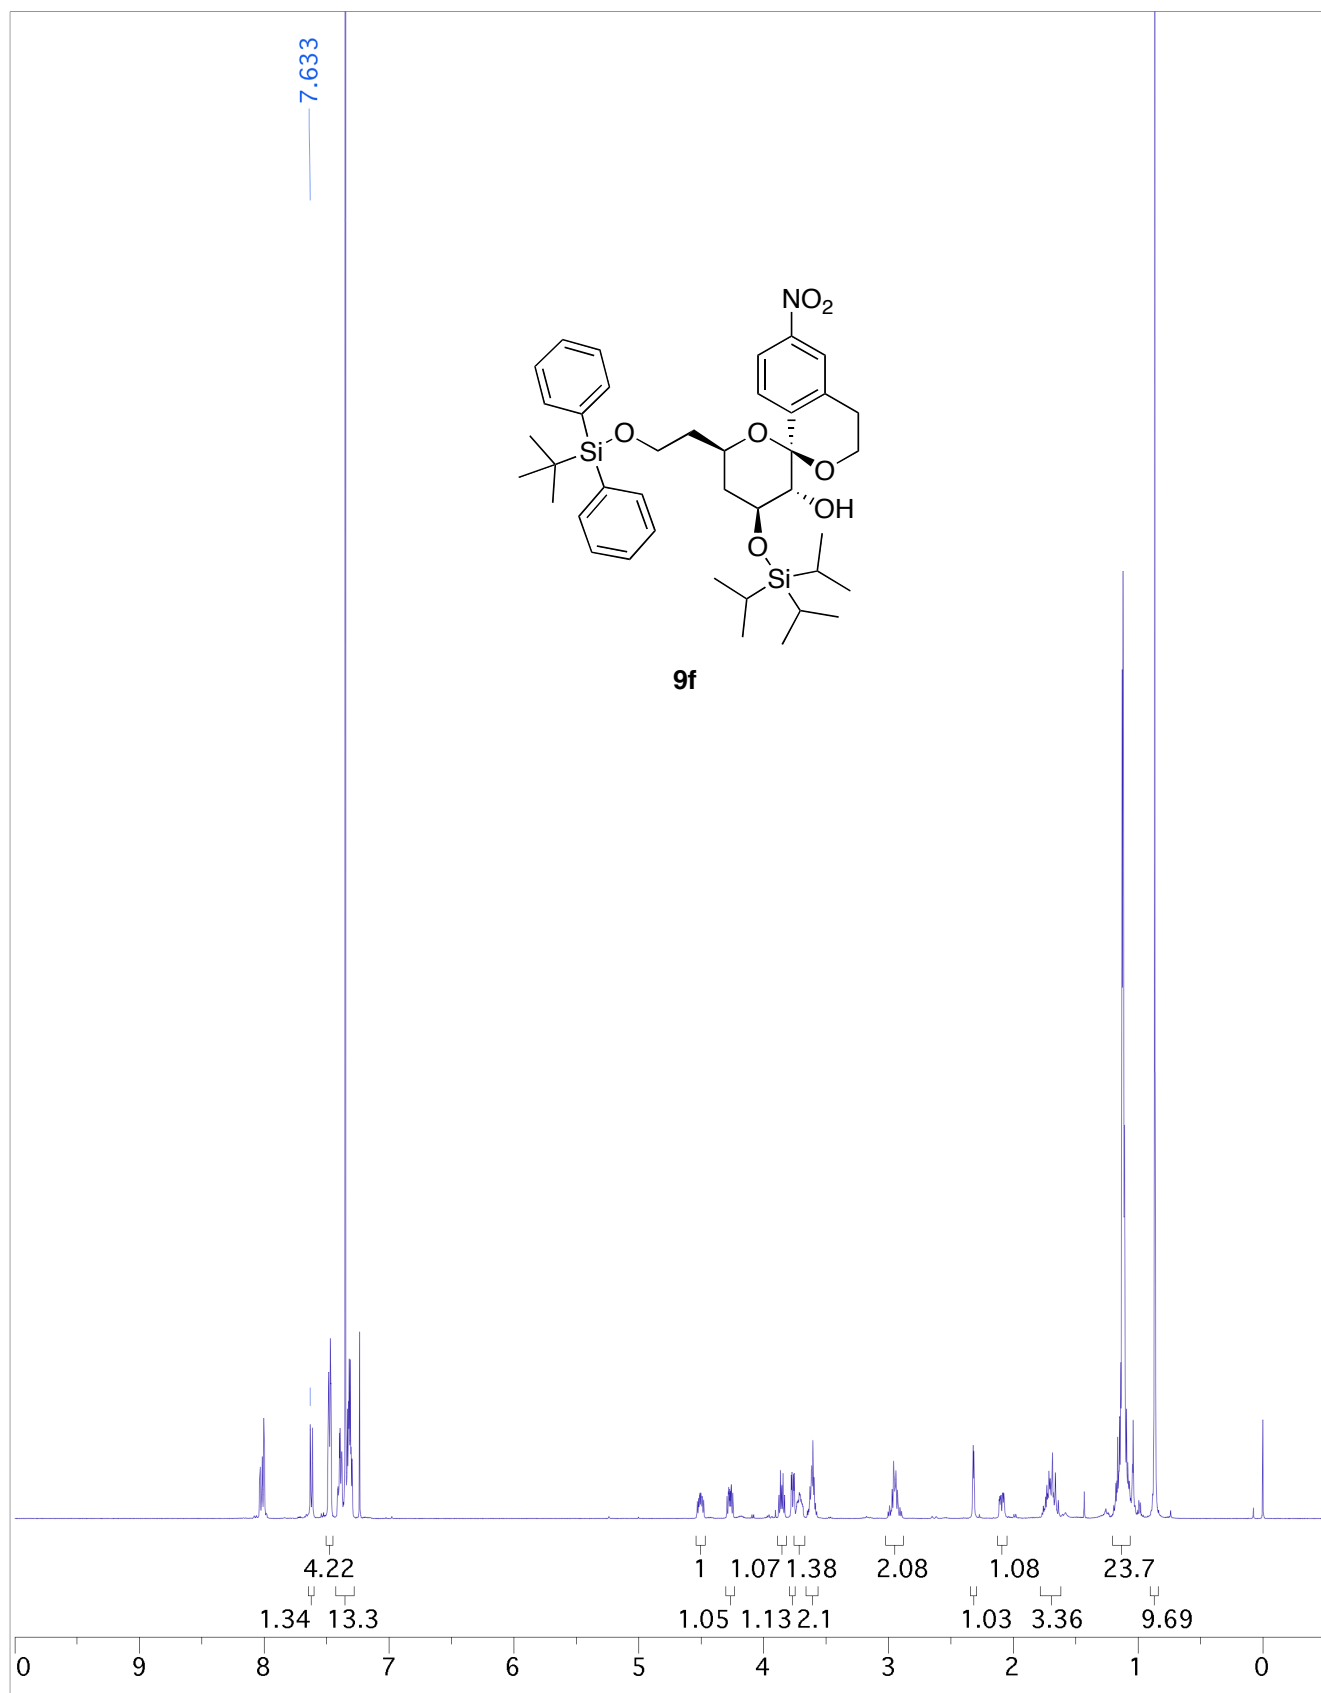

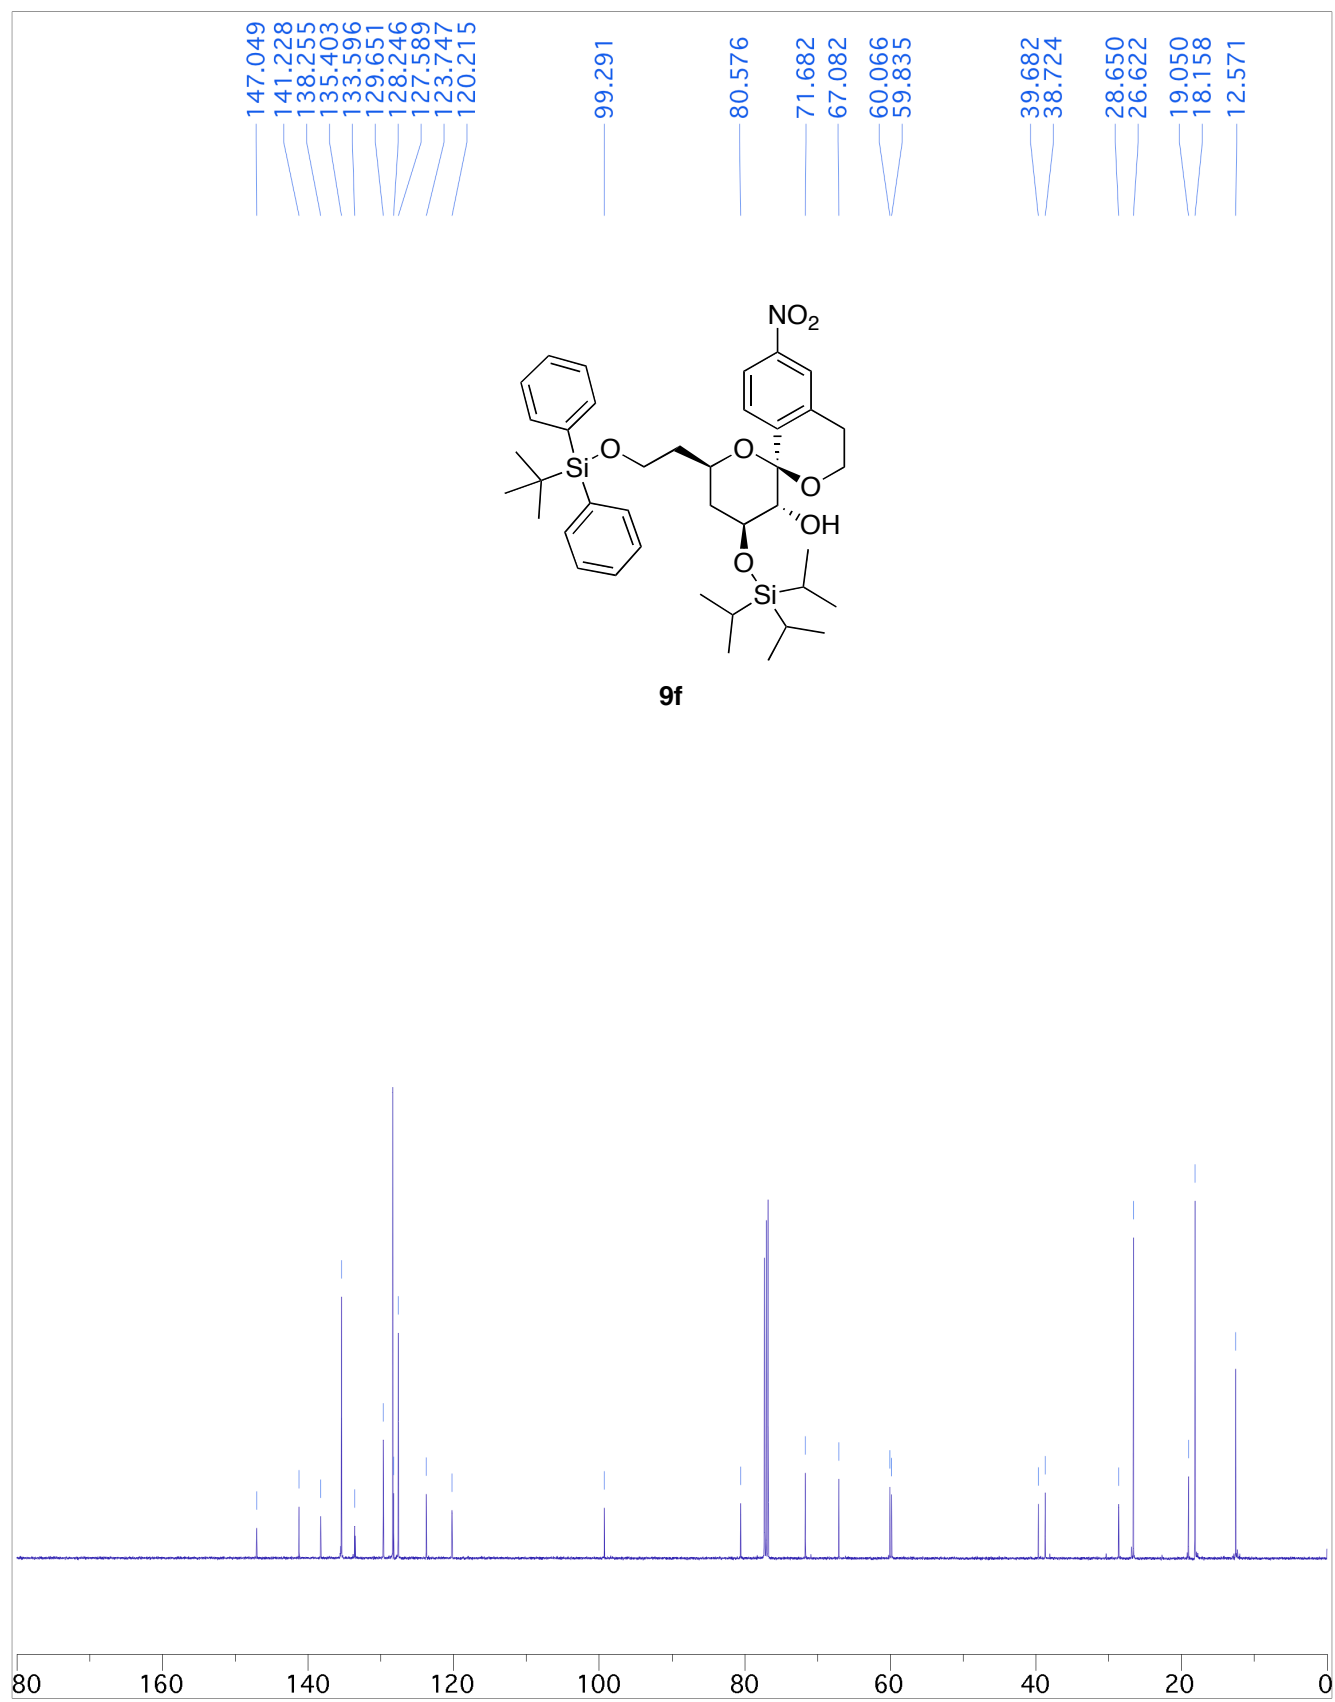

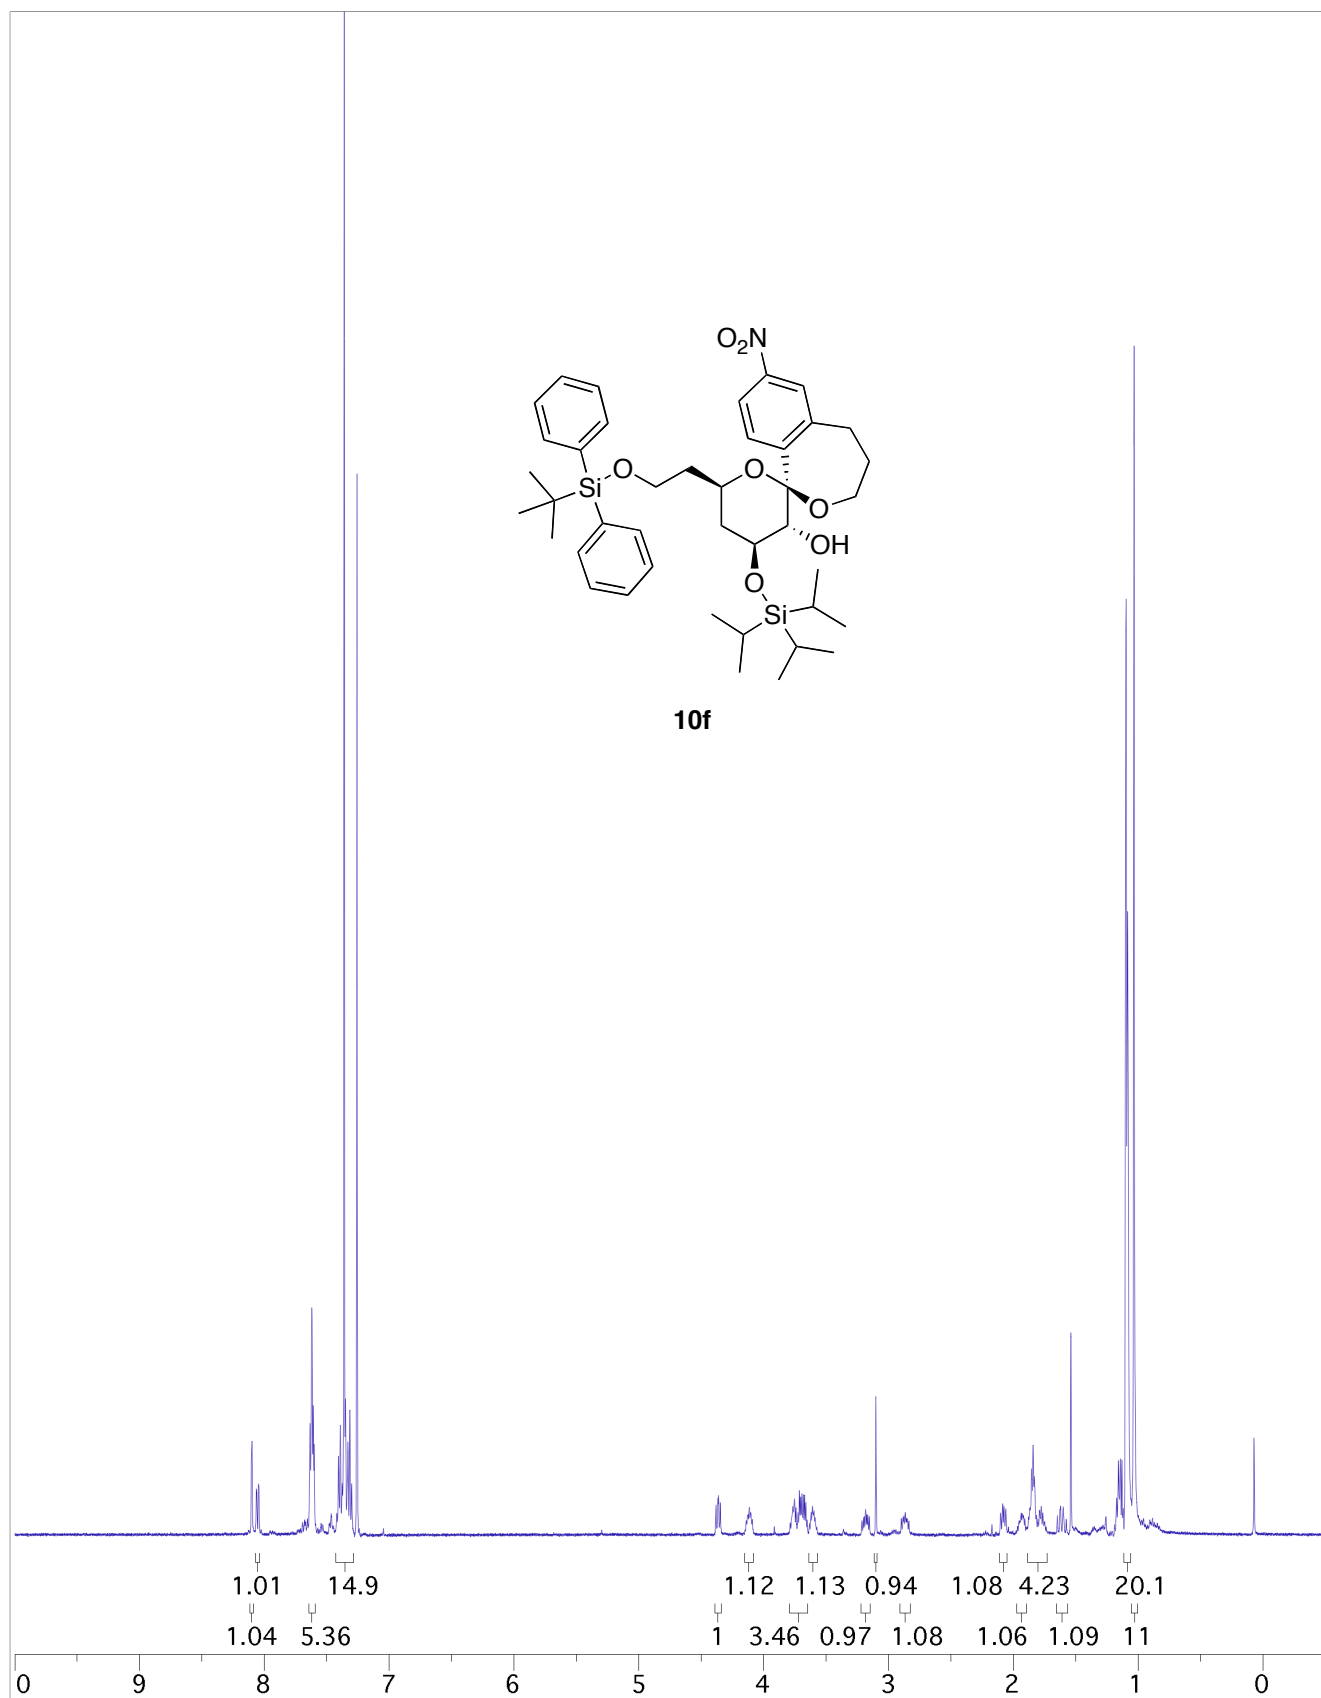



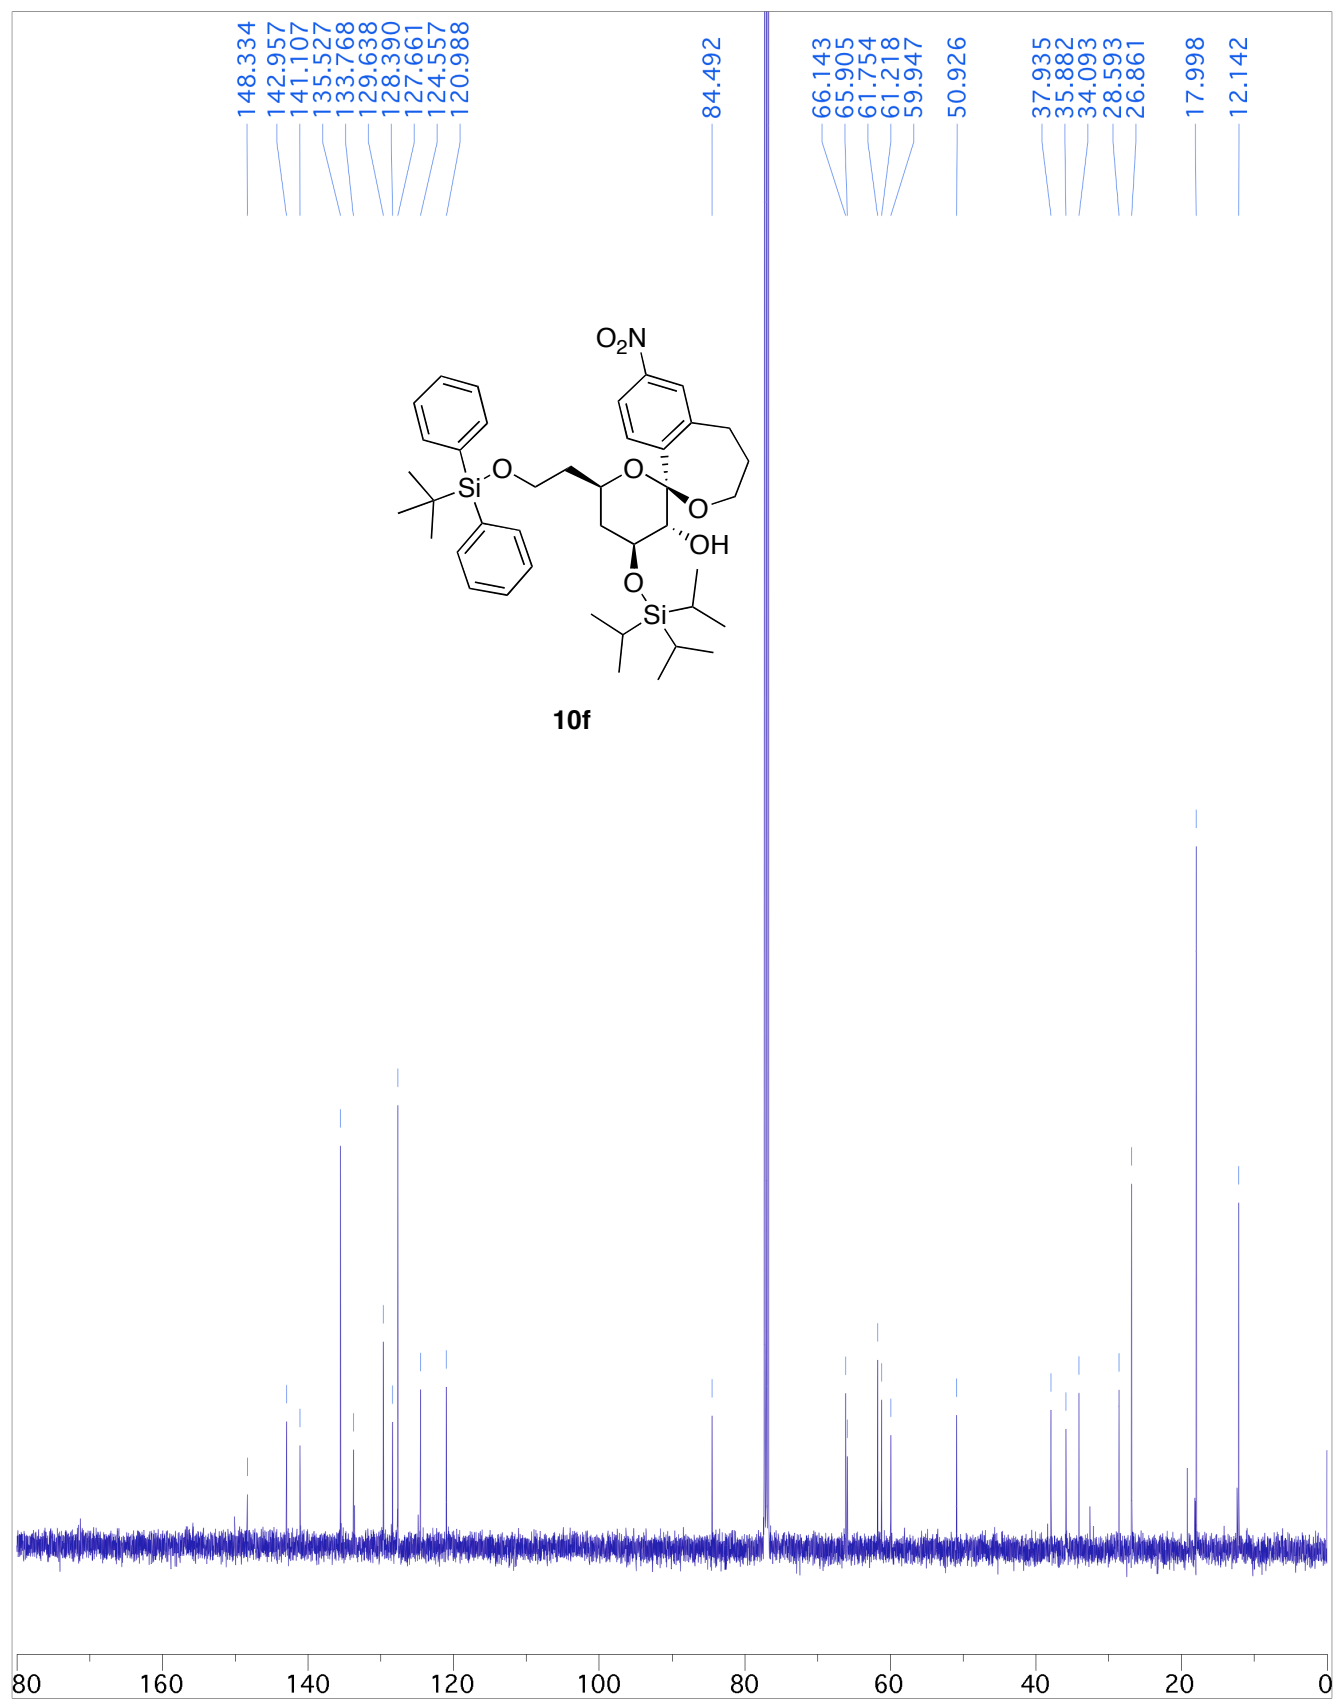

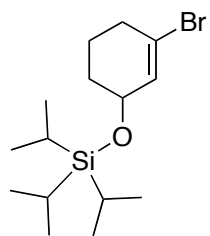**S29**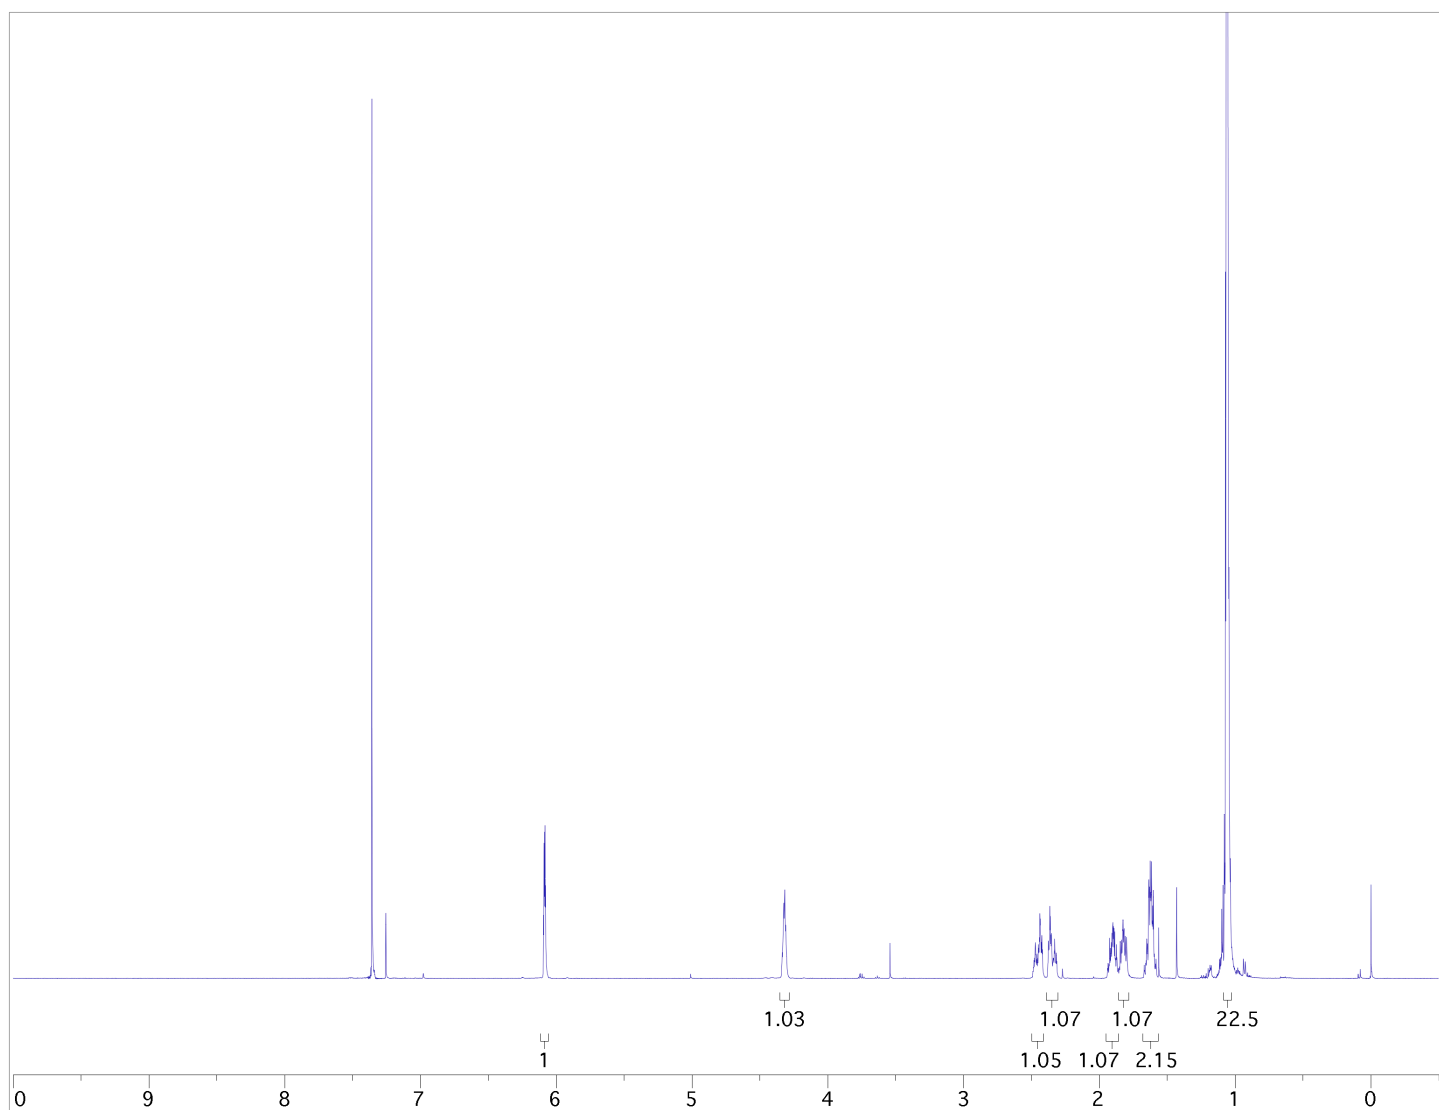

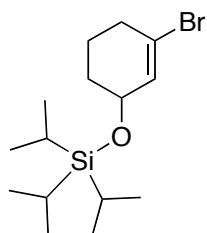**S29**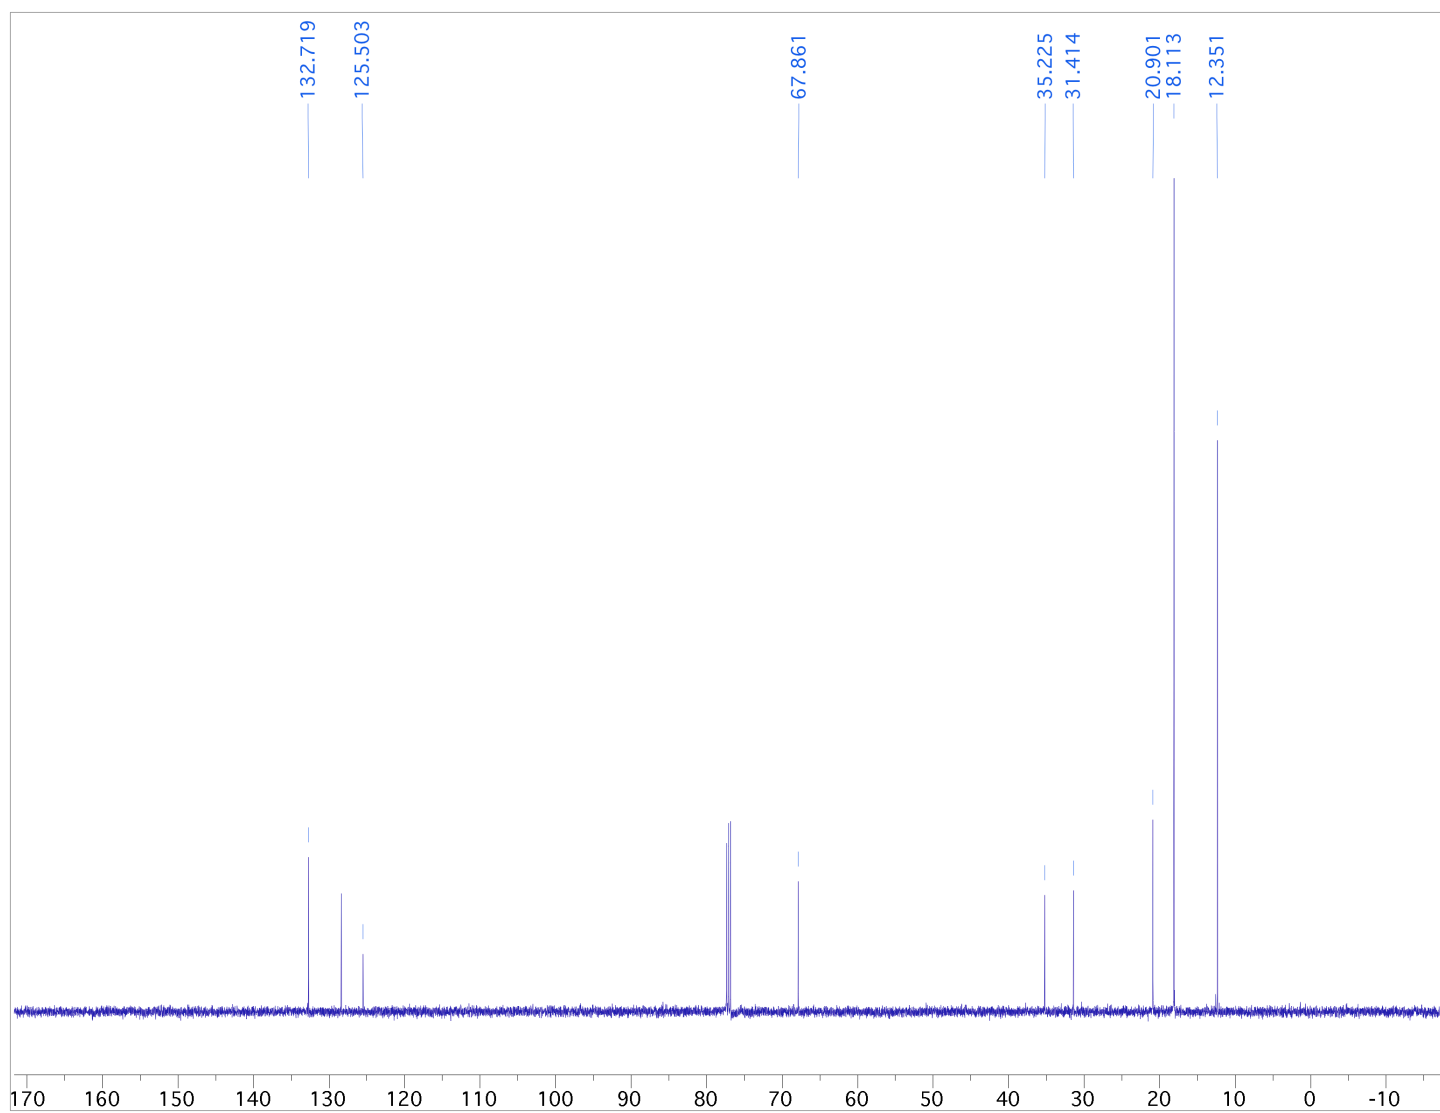

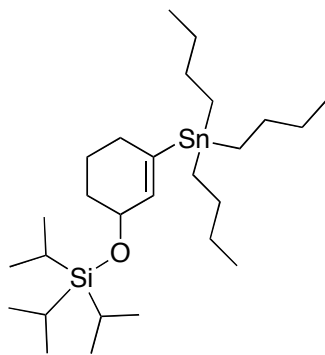

**S30**

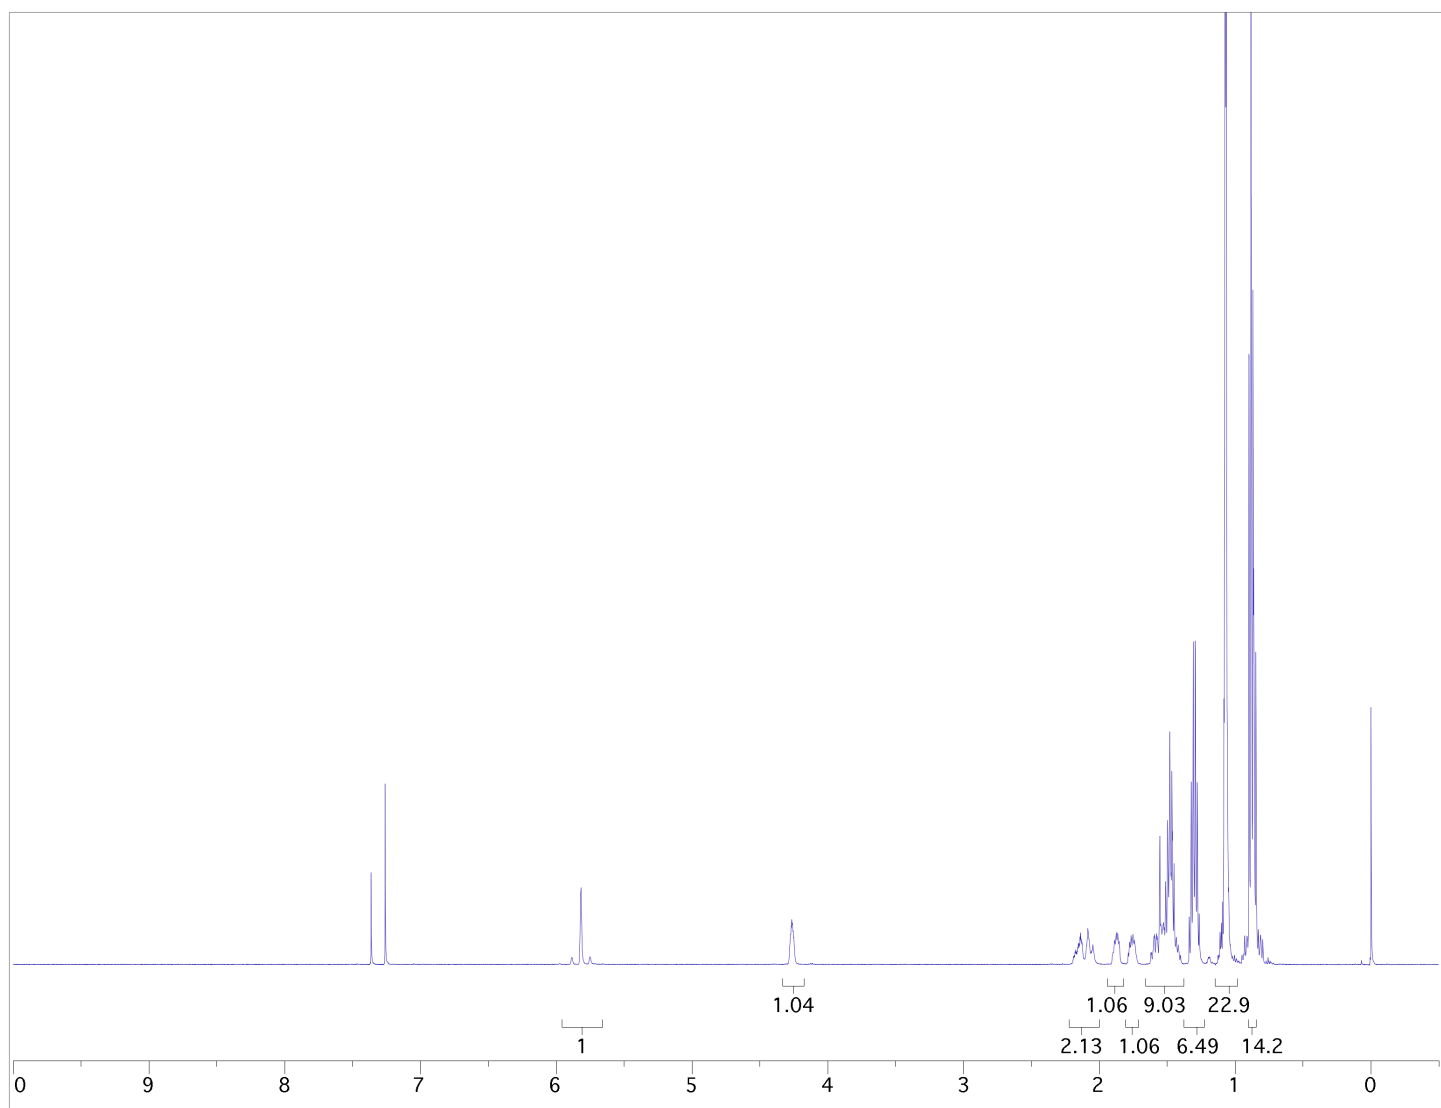

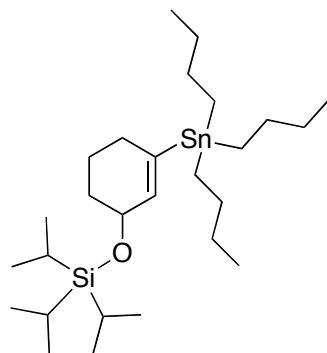**S30**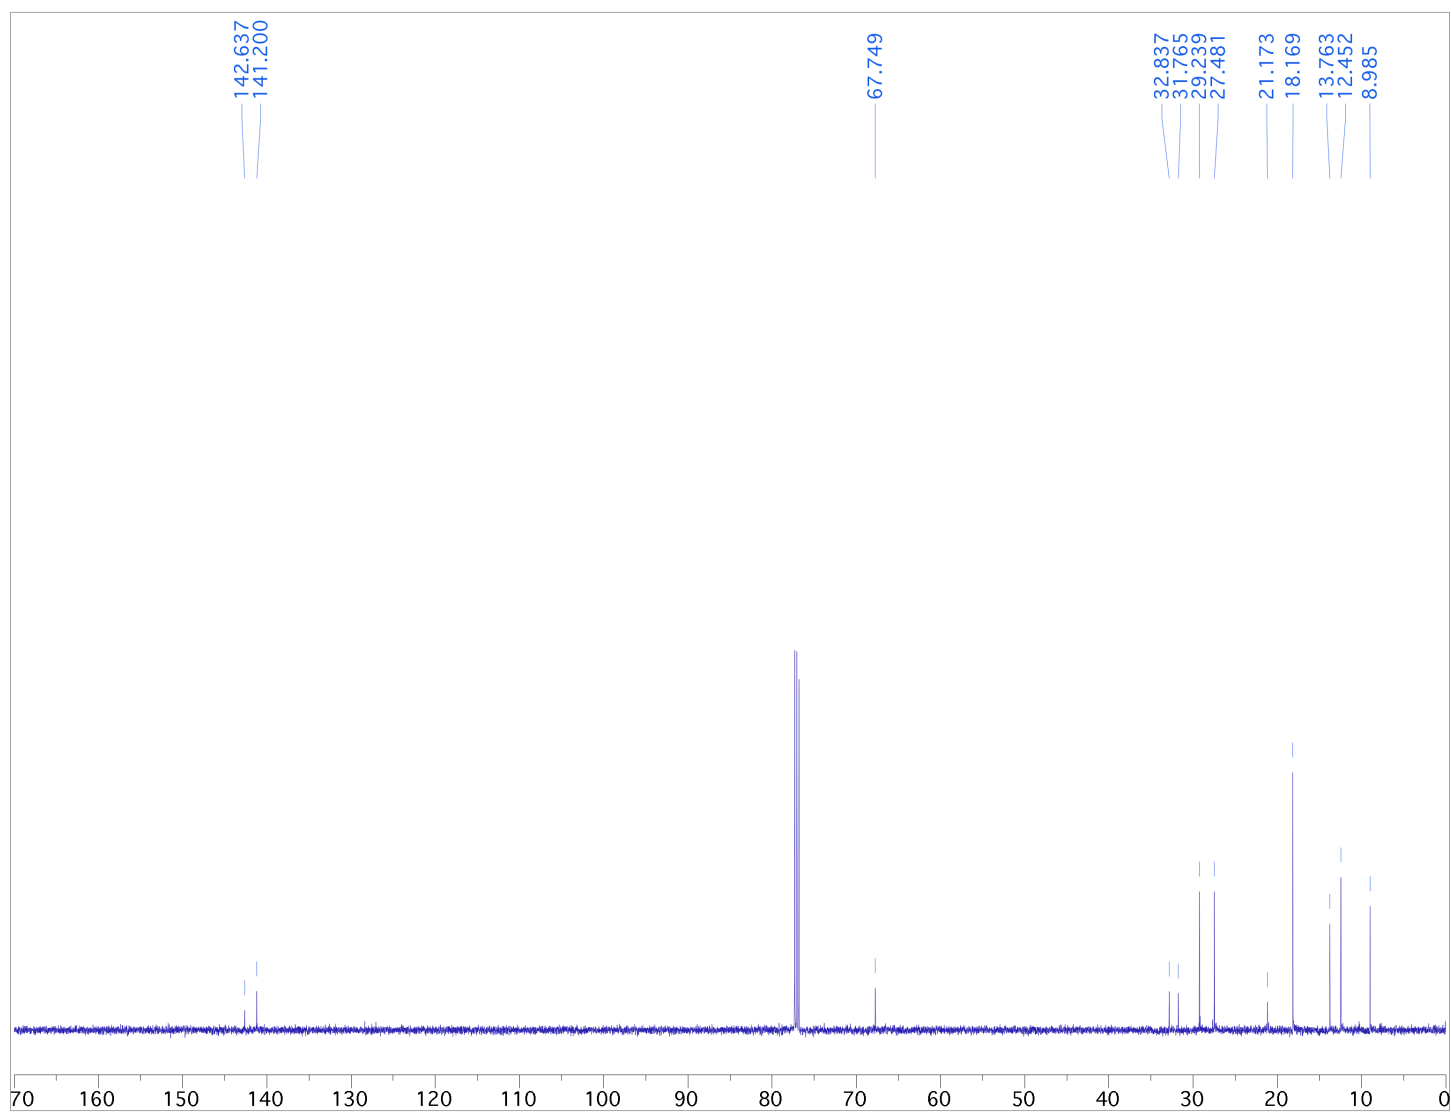

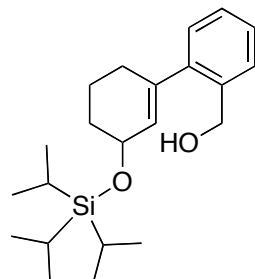

26

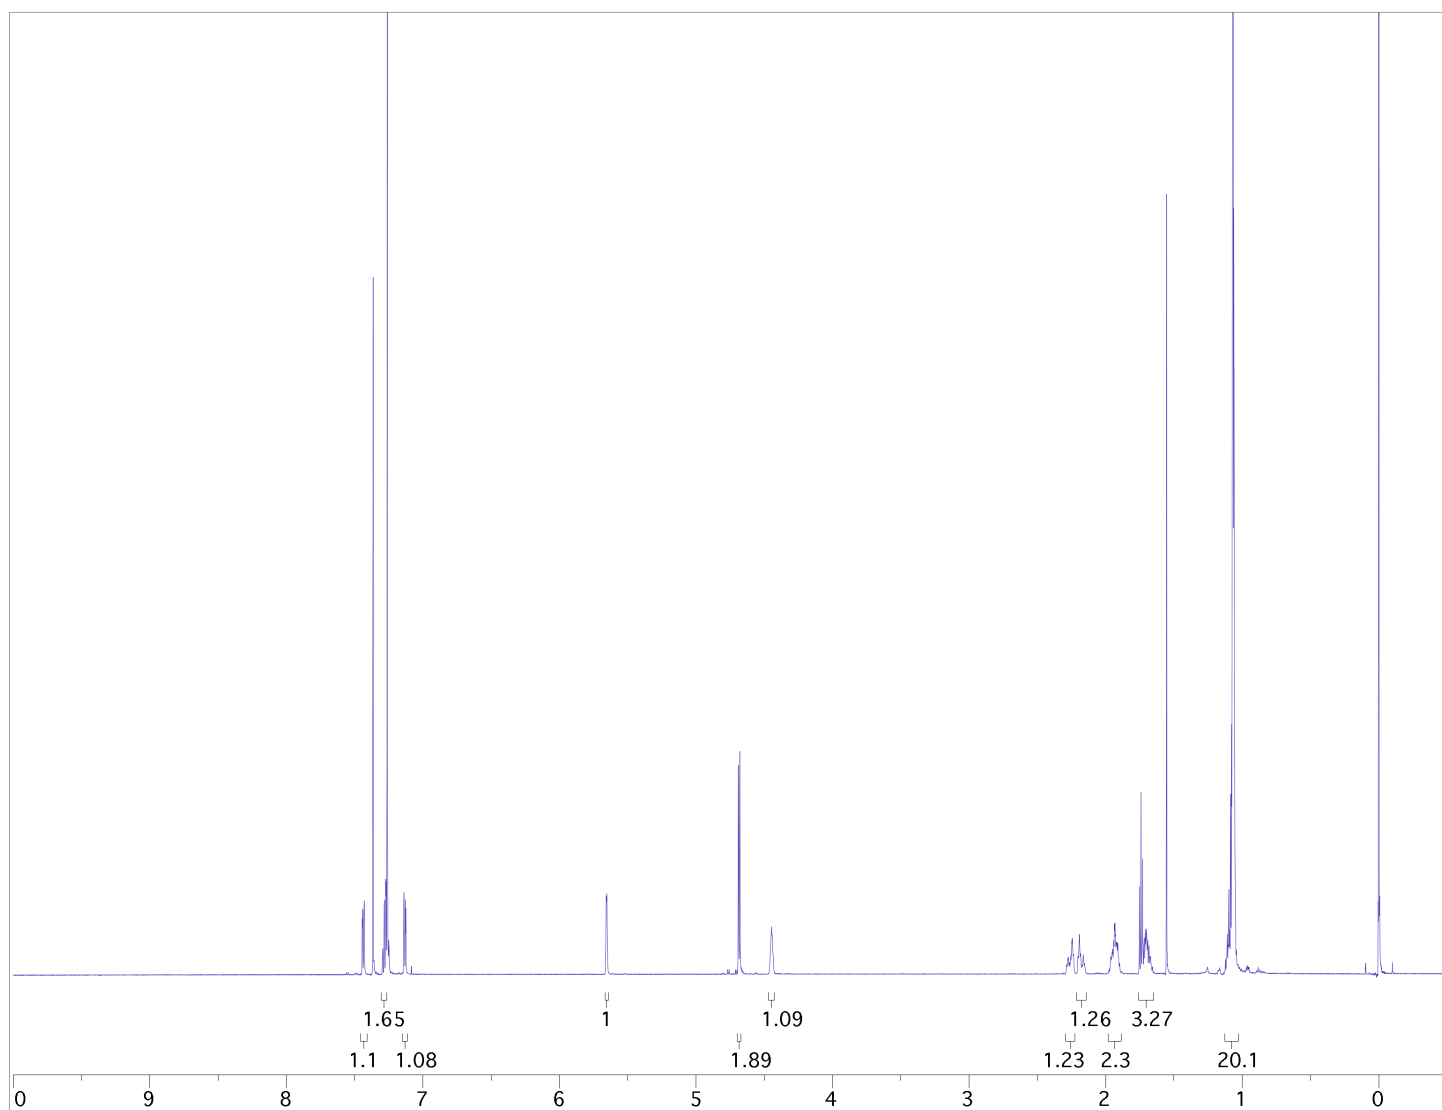

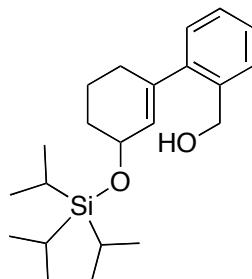

26

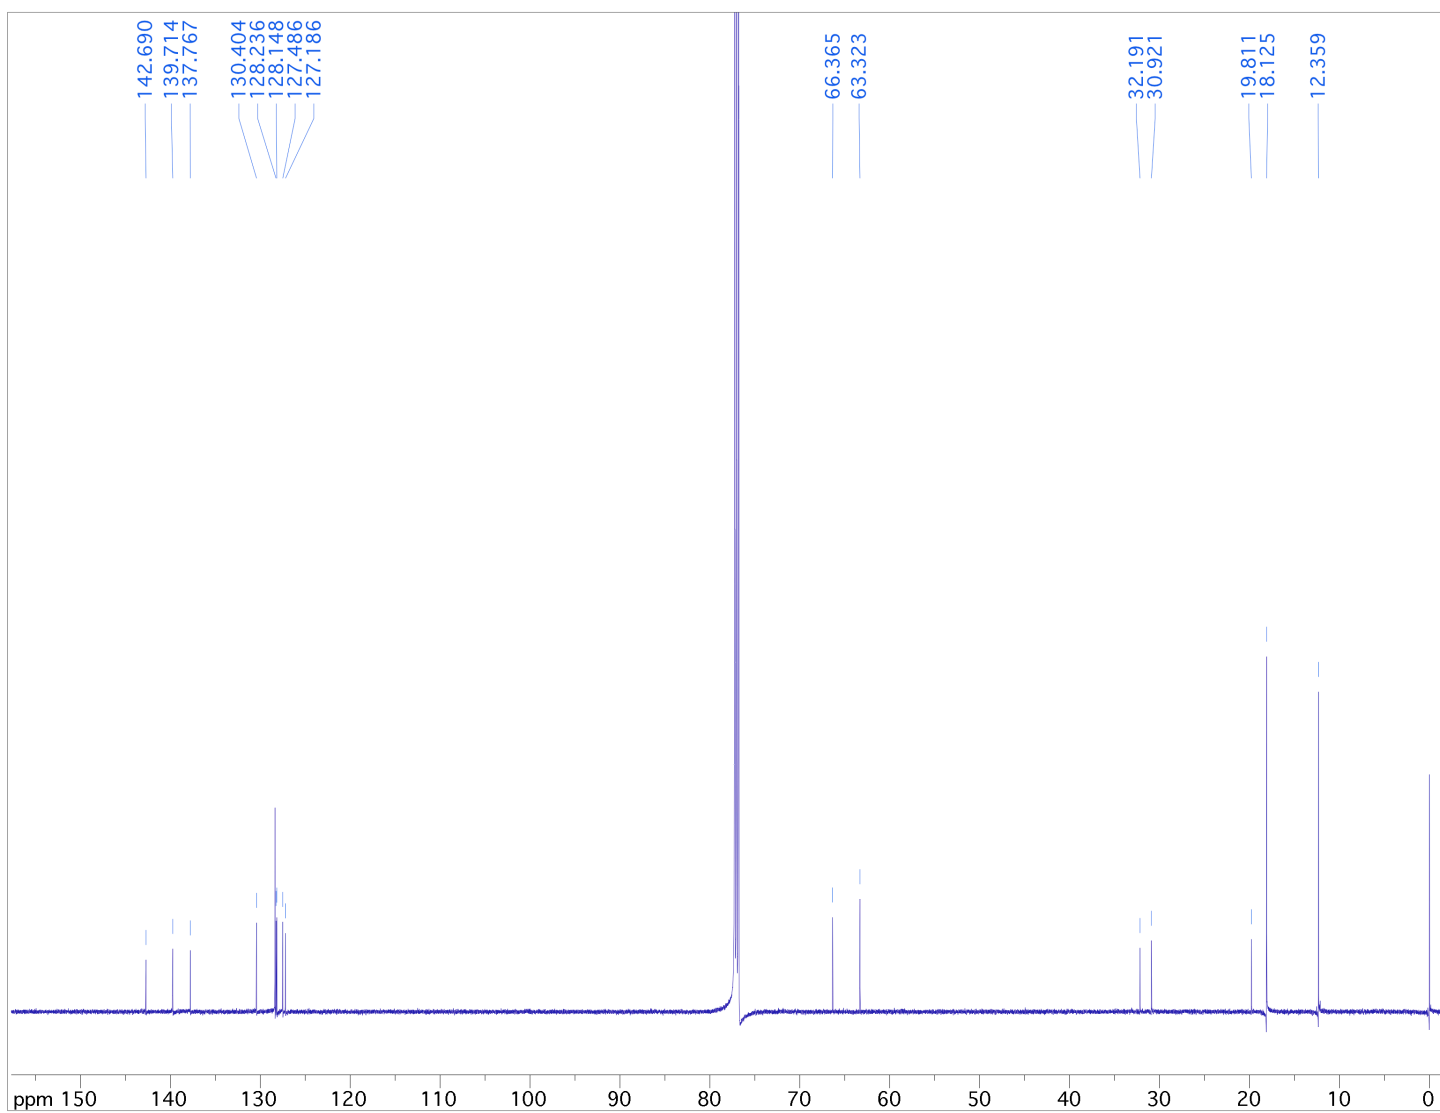

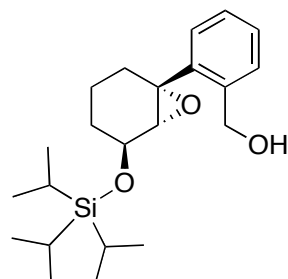

27

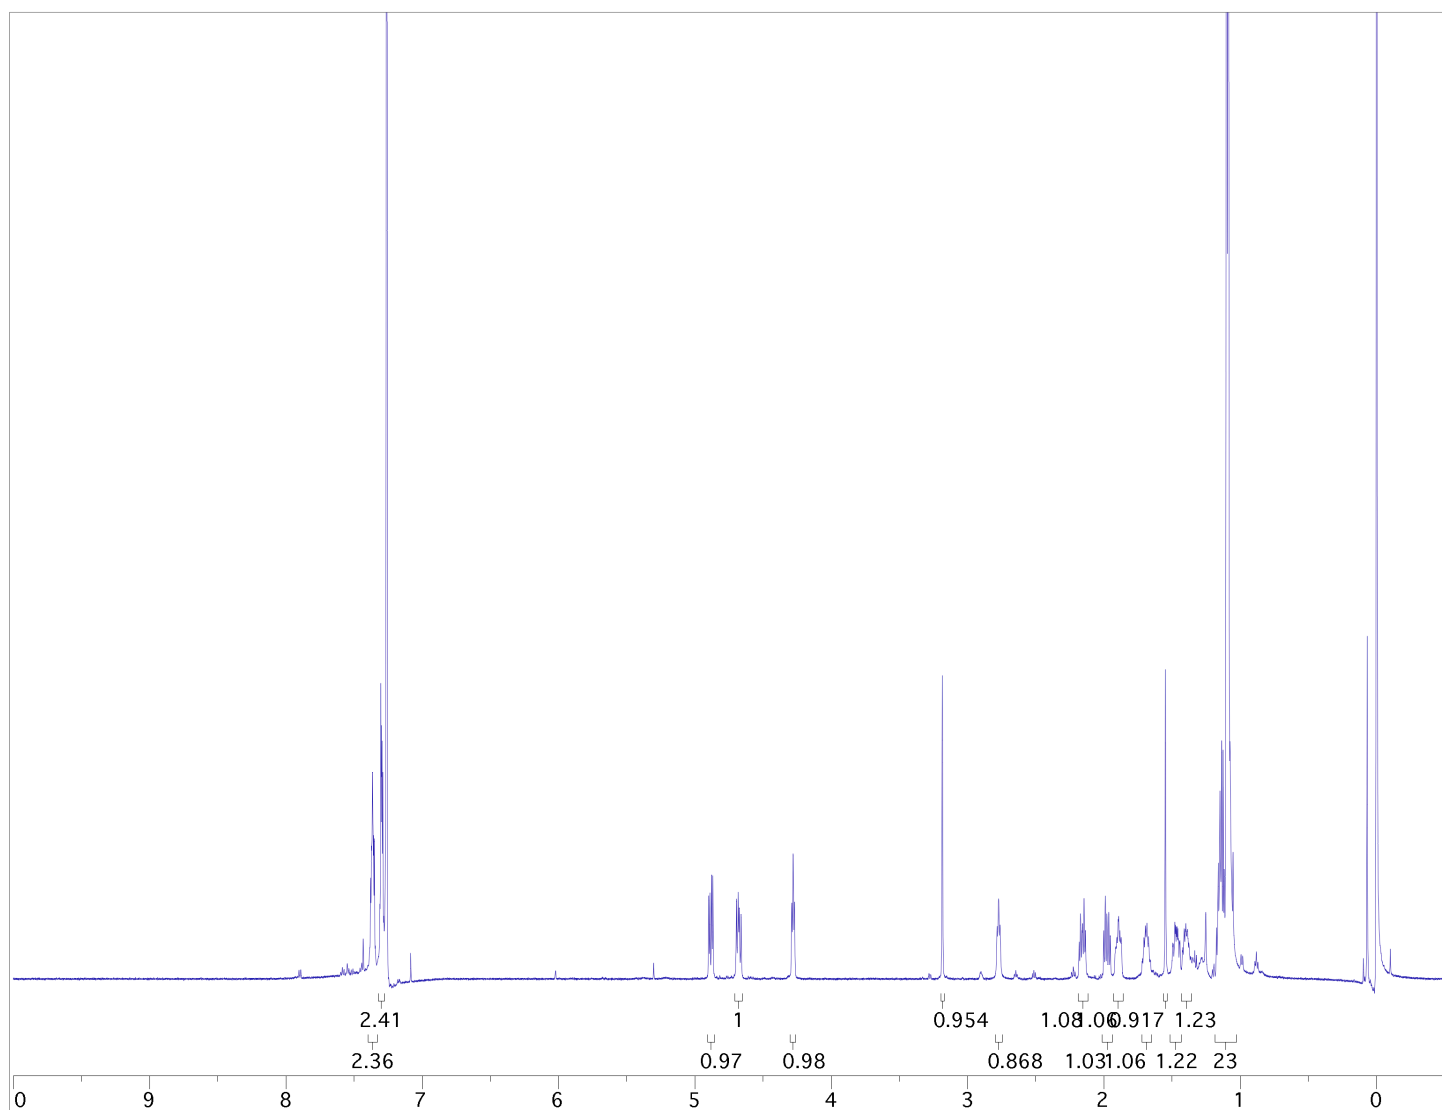



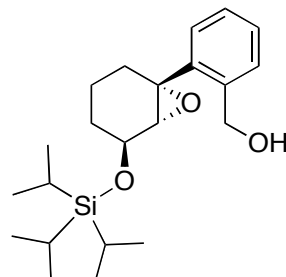

27

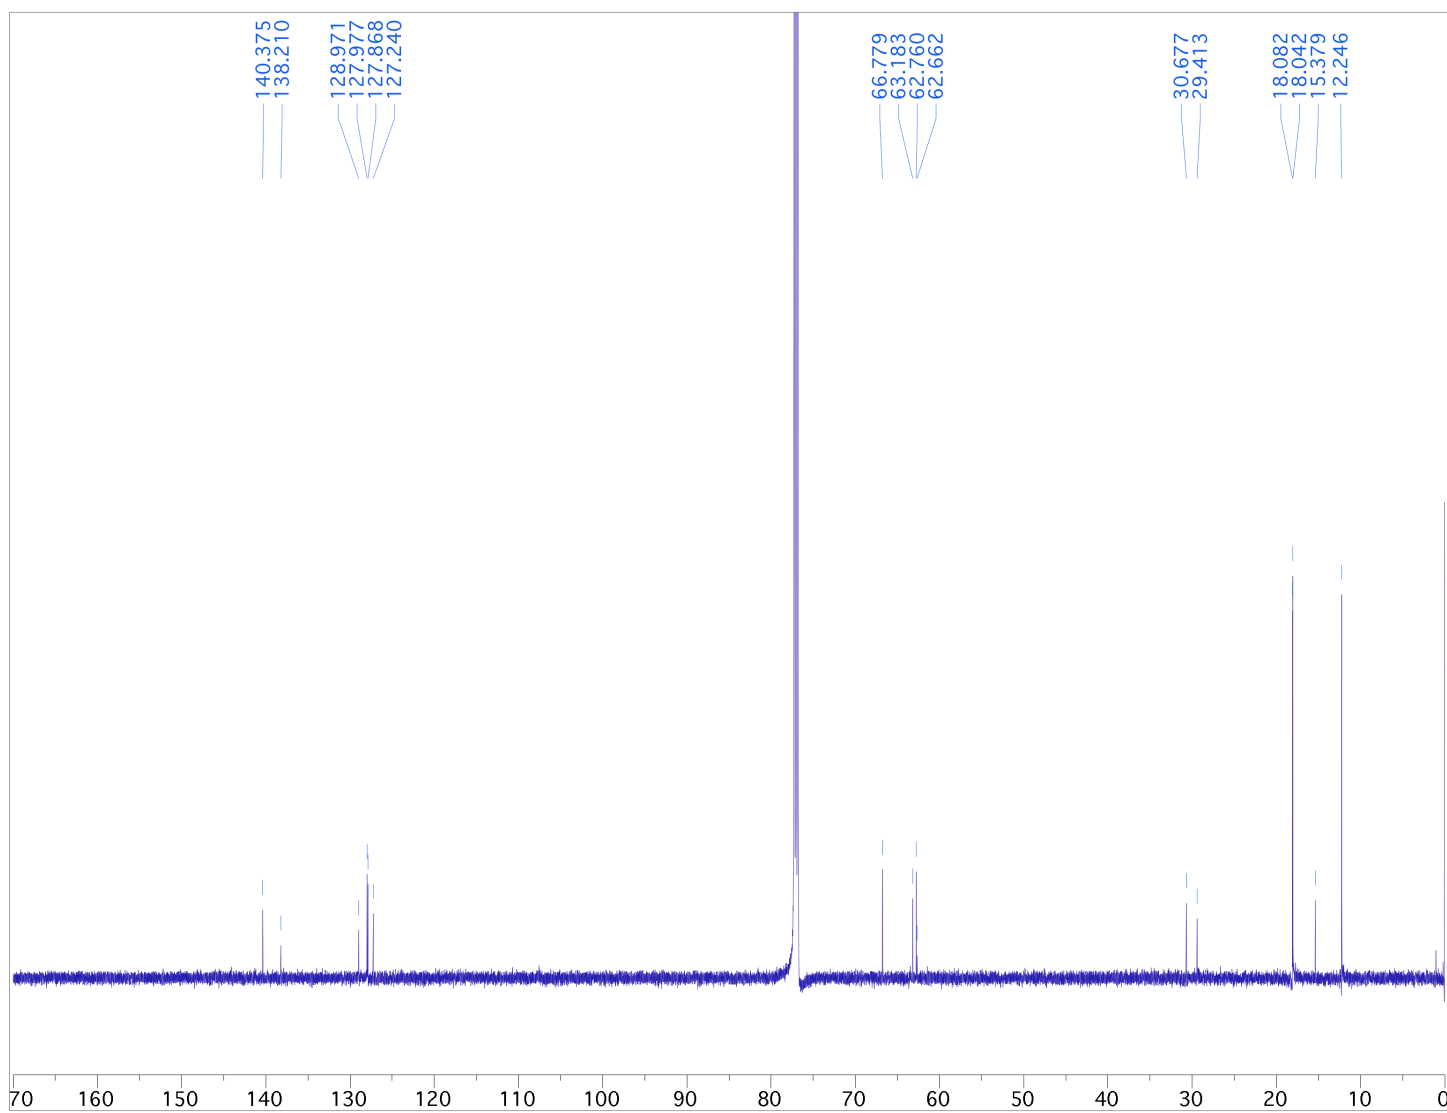

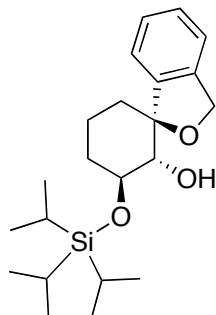**28**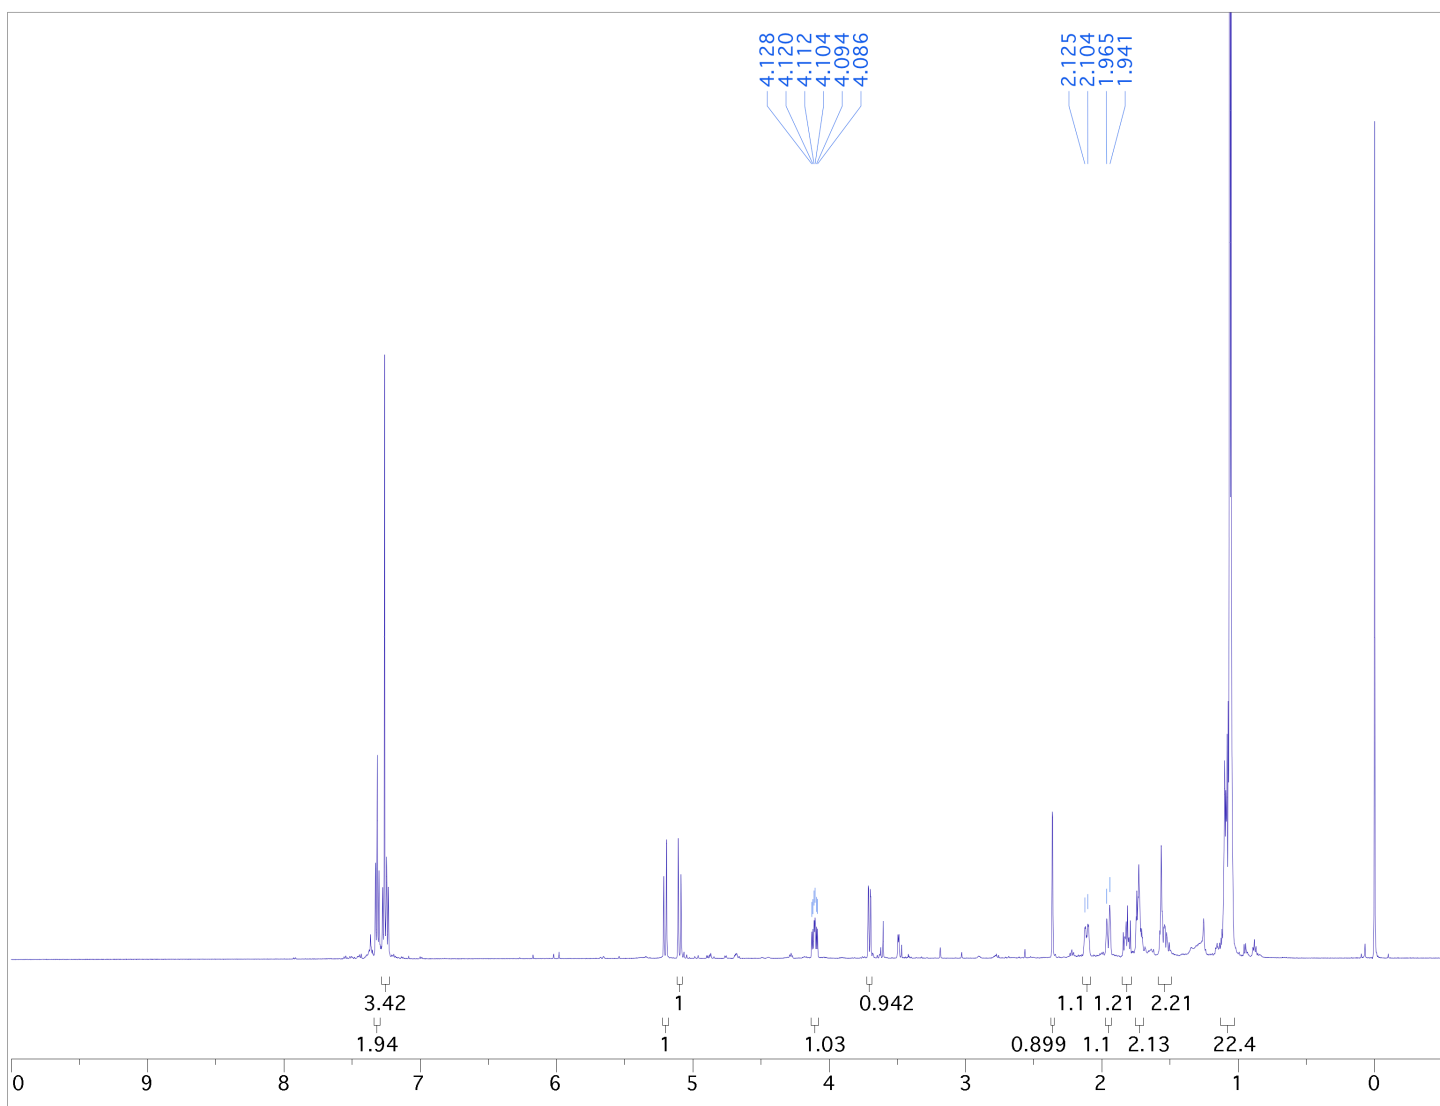

**28**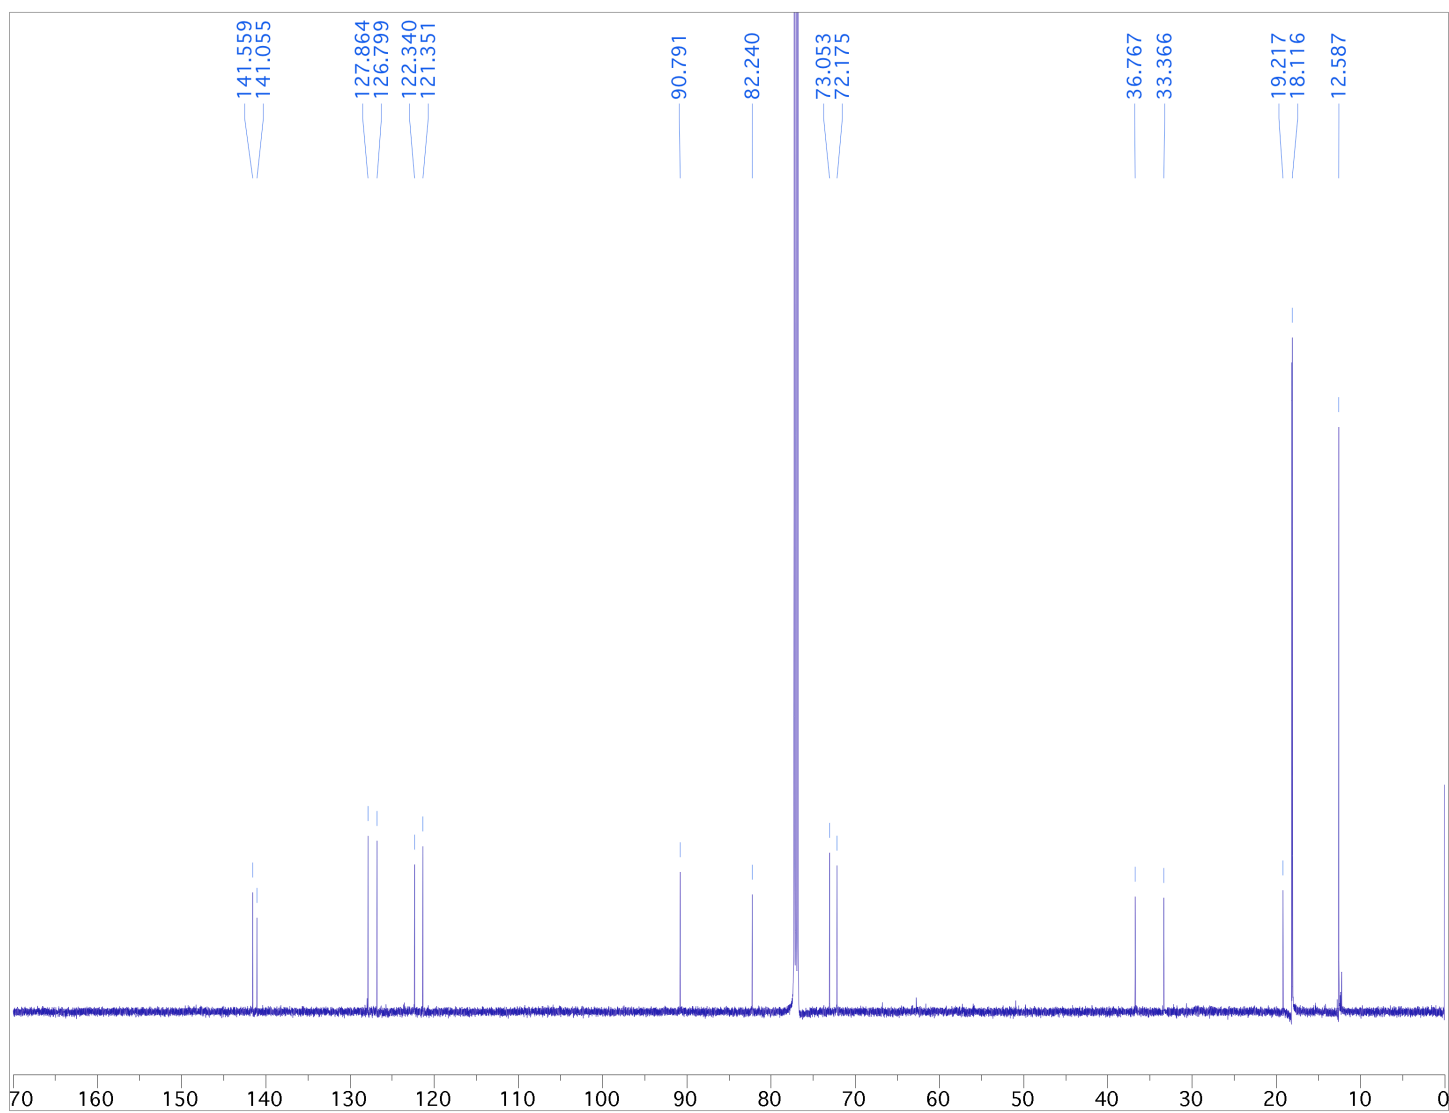

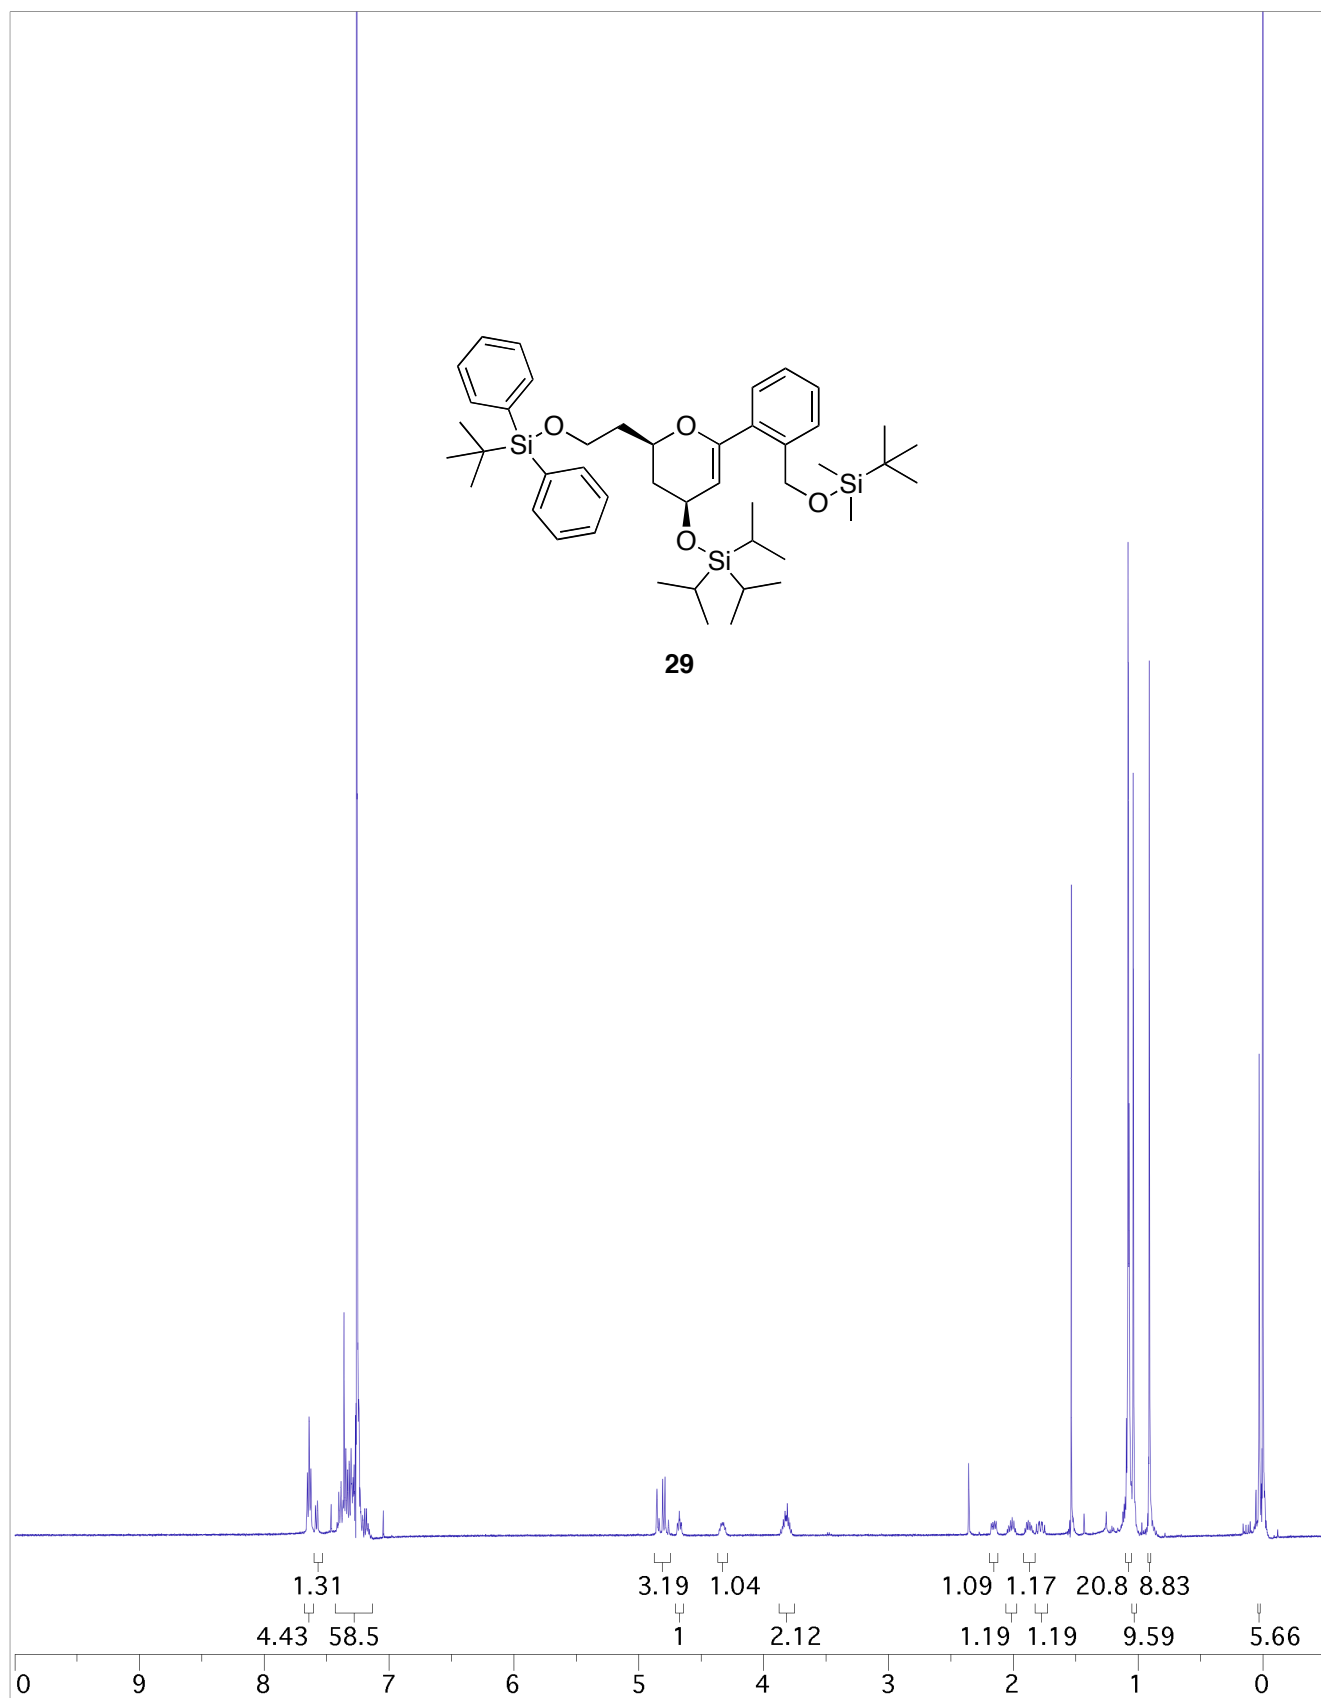

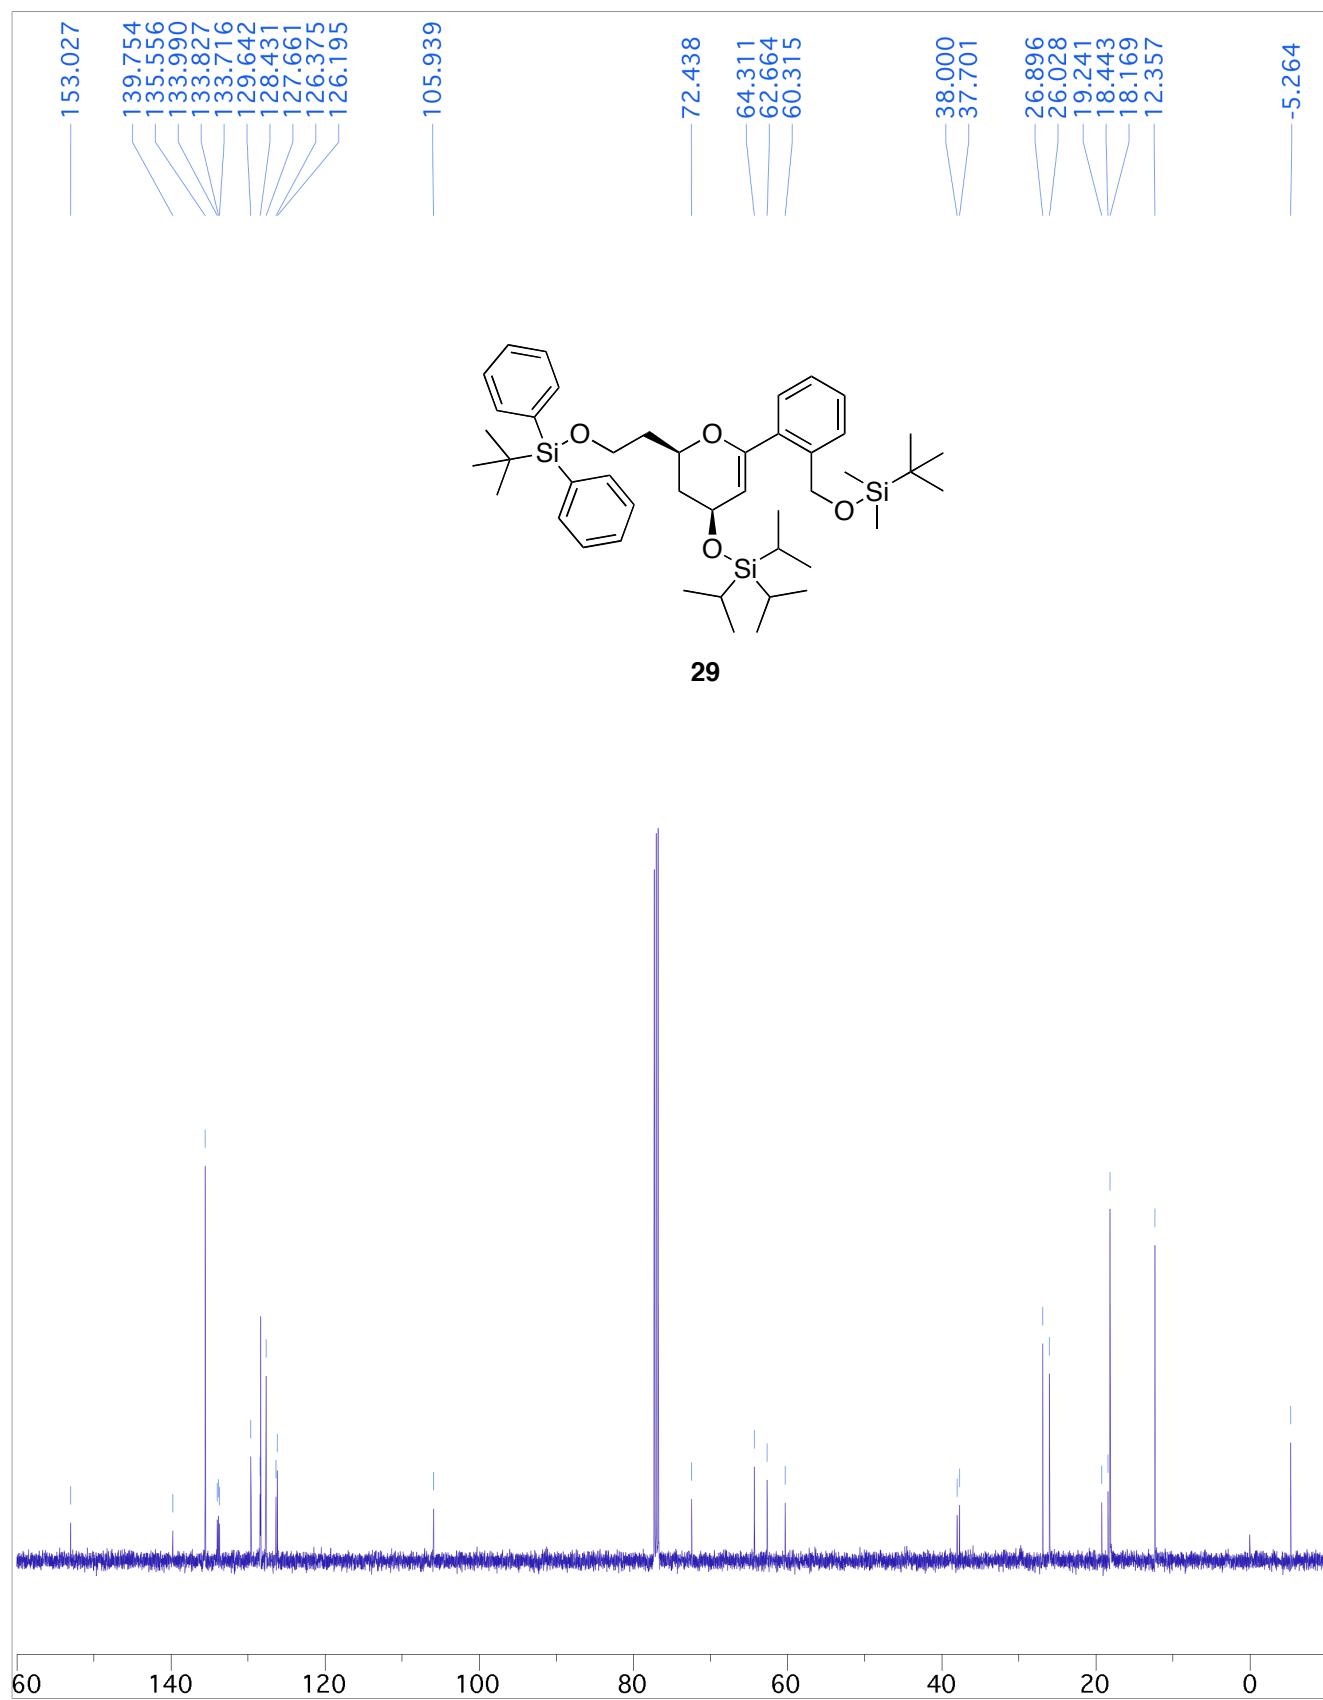

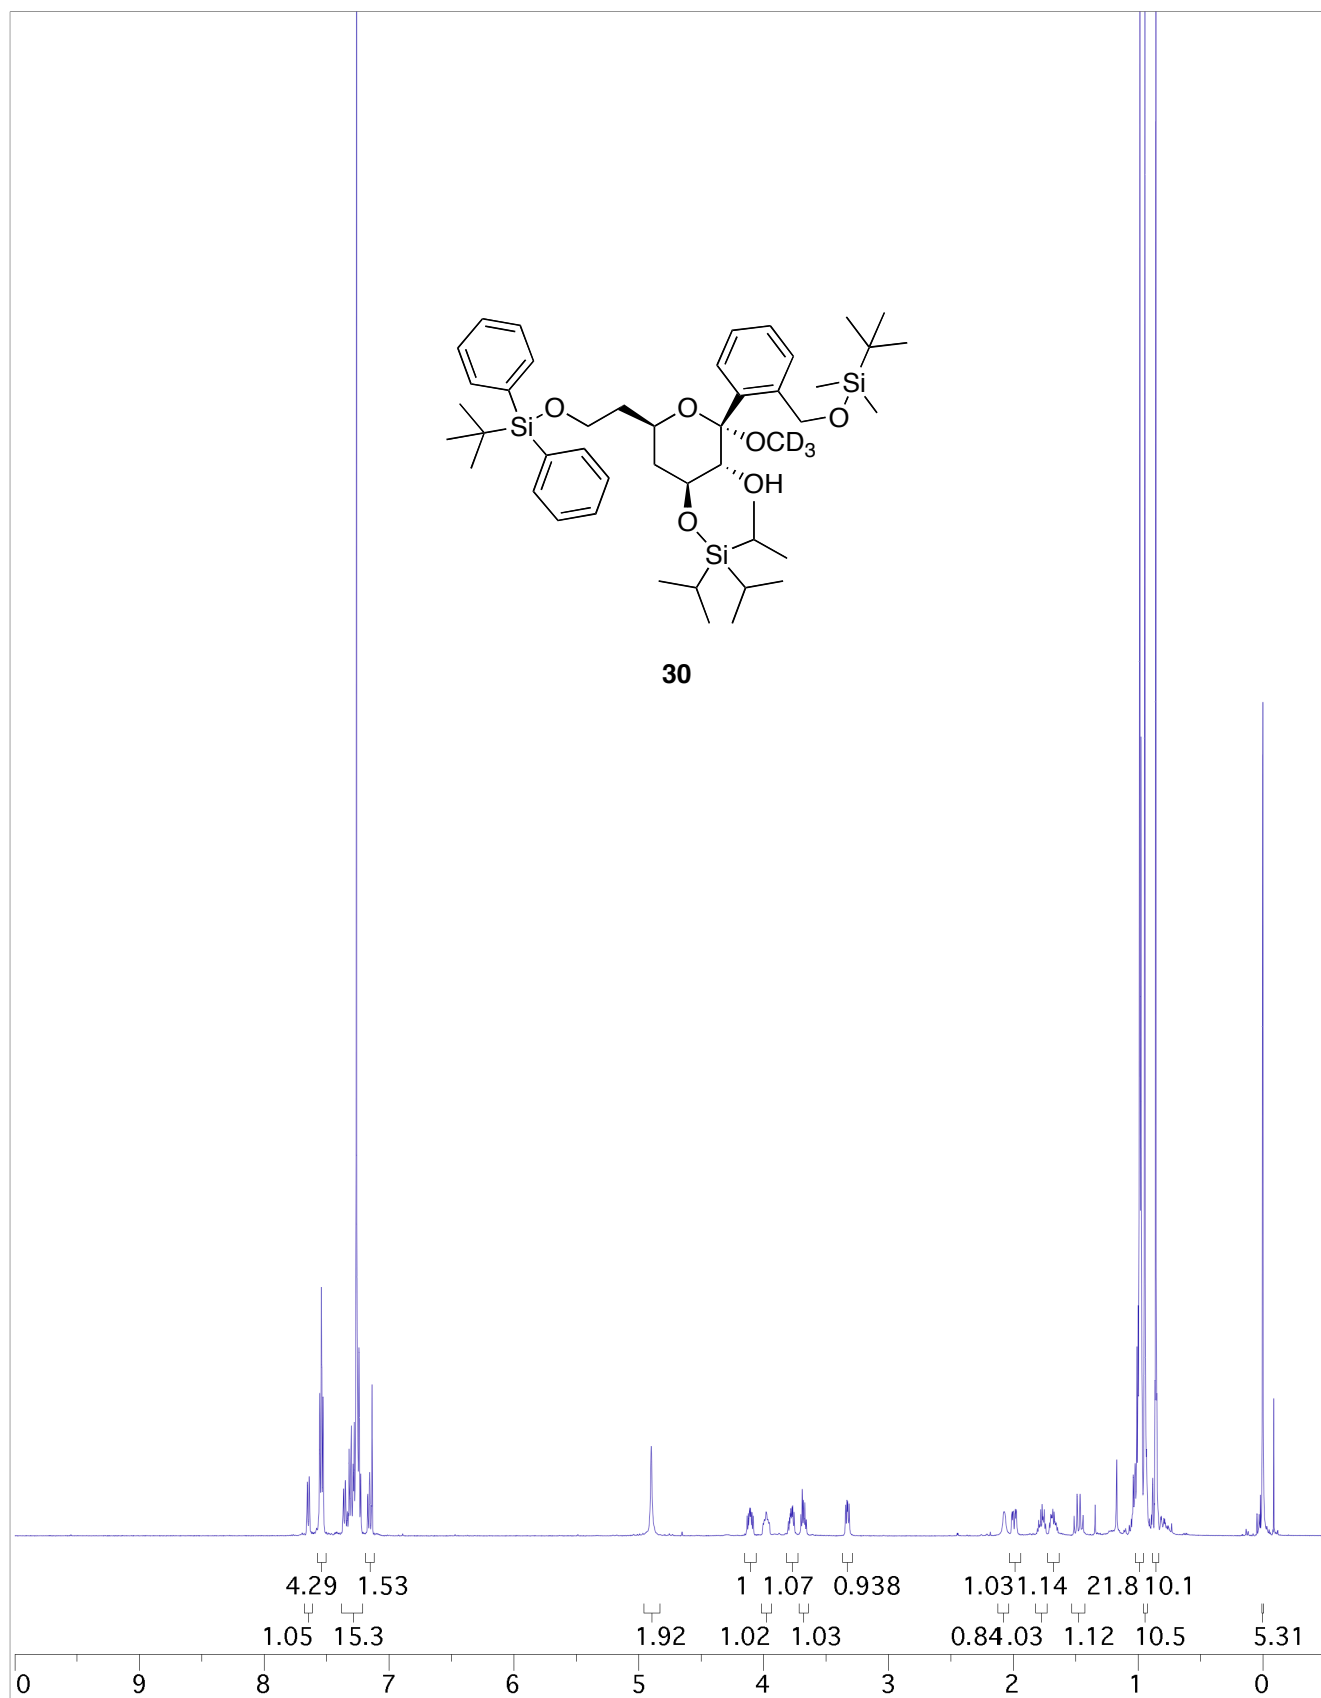

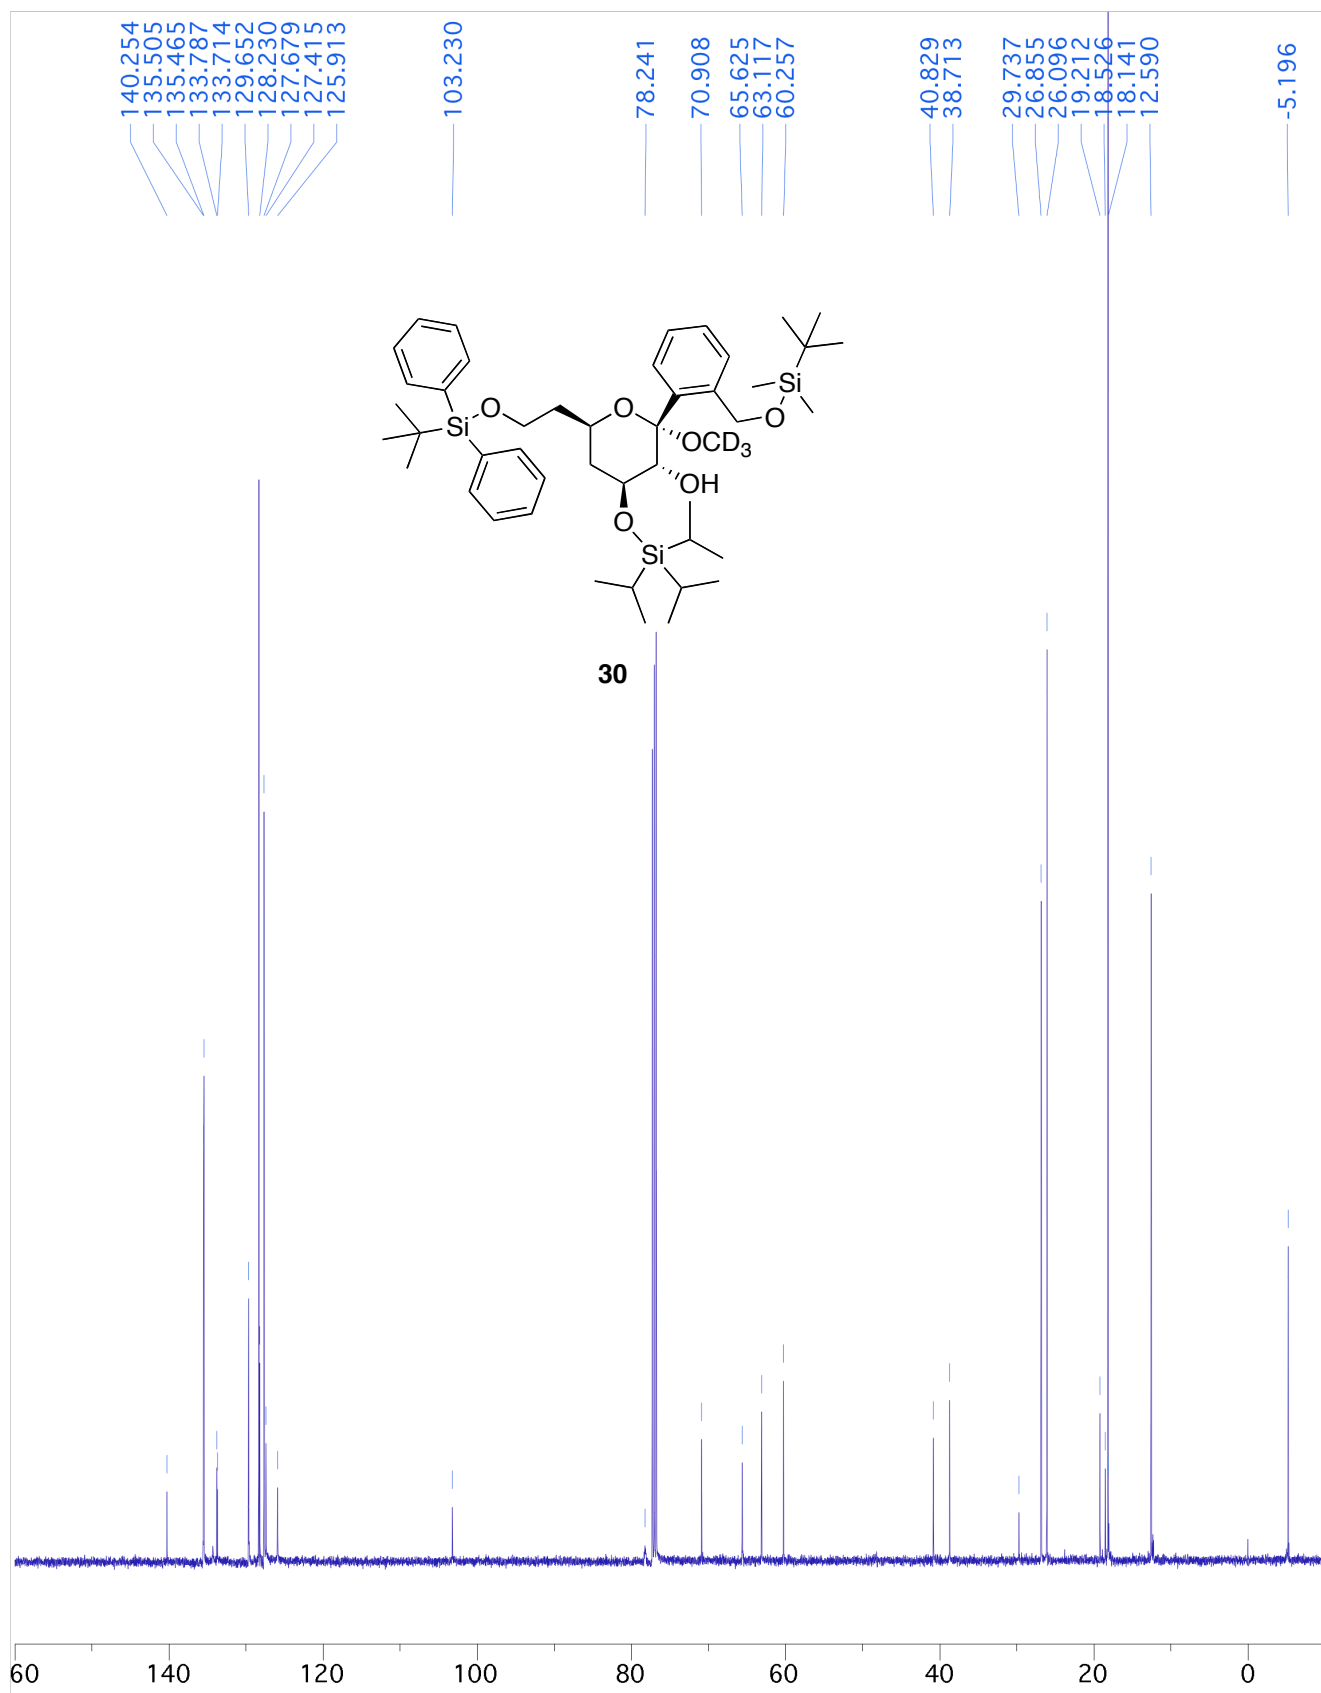

Supplement: NIHMS294153-supplement-2_si_002.pdf [file NIHMS294153-supplement-2_si_002.pdf]
